# Supplementary material for: Use and application of iNaturalist on land snails from Argentina
Source: PeerJ. 2025 Mar 17;13:e19152. doi: 10.7717/peerj.19152 (PMC11925043; doi:10.7717/peerj.19152)
Supplement: Supplemental Information 1 [file peerj-13-19152-s001.xlsx]

## Sheet: Hoja1
id	observed_on_string	observed_on	time_observed_at	time_zone	user_id	user_login	user_name	created_at	updated_at	quality_grade	license	url	image_url	sound_url	tag_list	description	num_identification_agreements	num_identification_disagreements	captive_cultivated	oauth_application_id	place_guess	latitude	longitude	positional_accuracy	private_place_guess	private_latitude	private_longitude	public_positional_accuracy	geoprivacy	taxon_geoprivacy	coordinates_obscured	positioning_method	positioning_device	place_town_name	place_county_name	place_state_name	place_country_name	place_admin1_name	place_admin2_name	species_guess	scientific_name	common_name	iconic_taxon_name	taxon_id	taxon_species_name	taxon_subclass_name	taxon_superorder_name	taxon_order_name	taxon_superfamily_name
57588360	2019-01-30 15:35:00	2019-01-30	2019-01-30 18:35:00 UTC	Buenos Aires	1454648	r-a-p	RAP	2020-08-25 22:21:44 UTC	2023-03-24 05:29:52 UTC	needs_id	CC-BY-NC	https://www.inaturalist.org/observations/57588360	https://static.inaturalist.org/photos/91871381/medium.jpg				0	0	false		Buenos Aires, CABA, Argentina	-34601423658	-584433571957	8440				8440			false				Distrito Federal	Ciudad de Buenos Aires	Argentina	Ciudad de Buenos Aires	Distrito Federal	Allopeas gracile	Allopeas gracile		Mollusca	122396	Allopeas gracile	Heterobranchia	Eupulmonata	Stylommatophora	Achatinoidea
116894775	2022-05-12 19:38:00	2022-05-12	2022-05-12 22:38:00 UTC	America/Argentina/Cordoba	2197647	nstor8	Néstor Trossero	2022-05-13 22:39:53 UTC	2022-05-13 22:44:56 UTC	needs_id	CC0	https://www.inaturalist.org/observations/116894775	https://static.inaturalist.org/photos/197356816/medium.jpg				0	0	false		Paraná, AR-ER, AR	-31752184	-60493257	7				7			false				Paraná	Entre Ríos	Argentina	Entre Ríos	Paraná	Graceful Awlsnail	Allopeas gracile		Mollusca	122396	Allopeas gracile	Heterobranchia	Eupulmonata	Stylommatophora	Achatinoidea
149044401	2023-02-18 12:09:26	2023-02-18	2023-02-18 15:09:26 UTC	Buenos Aires	2504198	fernandoarchuby	Fernando Archuby	2023-02-18 15:16:01 UTC	2023-02-23 16:15:16 UTC	needs_id	CC-BY-SA	https://www.inaturalist.org/observations/149044401	https://static.inaturalist.org/photos/256767591/medium.jpeg			Diego Gutierrez Gregoric me dijo que esta especie es similar a Subulina octona y es comÃºn en jardines de esta regiÃ³n.	0	0	false	2	B1896, Provincia de Buenos Aires, Argentina	-348655851401	-580375746265	9				9			false	gps	gps		La Plata	Buenos Aires	Argentina	Buenos Aires	La Plata	Allopeas gracile	Allopeas gracile		Mollusca	122396	Allopeas gracile	Heterobranchia	Eupulmonata	Stylommatophora	Achatinoidea
192783810	2023-12-02 00:53:29	2023-12-02	2023-12-02 03:53:29 UTC	America/Argentina/Cordoba	1075963	enzo_ferreyra	Enzo Edgardo Ferreyra	2023-12-02 04:00:27 UTC	2023-12-02 04:00:41 UTC	needs_id	CC-BY-NC	https://www.inaturalist.org/observations/192783810	https://static.inaturalist.org/photos/338508978/medium.jpeg				0	0	false	2	Yapeyú, Corrientes, Argentina	-294645631618	-568153643981	5				5			false	gps	gps		San Martín	Corrientes	Argentina	Corrientes	San Martín	Allopeas gracile	Allopeas gracile		Mollusca	122396	Allopeas gracile	Heterobranchia	Eupulmonata	Stylommatophora	Achatinoidea
202705570	2024-03-16 14:25:17	2024-03-16	2024-03-16 17:25:17 UTC	Buenos Aires	6668882	pablo1035	Pablo Rubinstein	2024-03-16 19:54:39 UTC	2024-03-17 03:12:45 UTC	needs_id		https://www.inaturalist.org/observations/202705570	https://static.inaturalist.org/photos/358033034/medium.jpeg				0	0	false	2	Buenos Aires, AR	-345222880864	-584778615832	9310				9310		open	false				Vicente LÃ³pez	Buenos Aires	Argentina	Buenos Aires	Vicente LÃ³pez	Striped Garden Slug	Ambigolimax parvipenis	Babosa de bandas	Mollusca	1402453	Ambigolimax parvipenis	Heterobranchia	Eupulmonata	Stylommatophora	Limacoidea
141312780	2022-11-06 18:37:00	2022-11-06	2022-11-06 21:37:00 UTC	Buenos Aires	5069381	rodriheliz		2022-11-06 22:20:43 UTC	2022-11-08 02:22:45 UTC	research	CC-BY-NC	https://www.inaturalist.org/observations/141312780	https://inaturalist-open-data.s3.amazonaws.com/photos/242055391/medium.jpg				1	0	false		Villa Real, CABA, Argentina	-34622312046	-585291426197	2				2		open	false				Distrito Federal	Ciudad de Buenos Aires	Argentina	Ciudad de Buenos Aires	Distrito Federal	Babosa de hibernadero	Ambigolimax valentianus	Babosa de hibernadero	Mollusca	448331	Ambigolimax valentianus	Heterobranchia	Eupulmonata	Stylommatophora	Limacoidea
141312785	2022-11-06 18:39:00	2022-11-06	2022-11-06 21:39:00 UTC	Buenos Aires	5069381	rodriheliz		2022-11-06 22:20:44 UTC	2022-11-07 00:15:22 UTC	research	CC-BY-NC	https://www.inaturalist.org/observations/141312785	https://inaturalist-open-data.s3.amazonaws.com/photos/242056170/medium.jpg				1	0	false		Villa Real, CABA, Argentina	-346221868102	-585292184759	2				2		open	false				Distrito Federal	Ciudad de Buenos Aires	Argentina	Ciudad de Buenos Aires	Distrito Federal	Babosa de hibernadero	Ambigolimax valentianus	Babosa de hibernadero	Mollusca	448331	Ambigolimax valentianus	Heterobranchia	Eupulmonata	Stylommatophora	Limacoidea
163104849	2023-05-22	2023-05-22		Buenos Aires	6908815	manuel1354	Manuel â€œManu-red010â€ Redondo	2023-05-22 12:15:38 UTC	2023-05-22 12:16:16 UTC	research		https://www.inaturalist.org/observations/163104849	https://static.inaturalist.org/photos/282074429/medium.jpeg				1	0	false	2	Balcarce 6202-6300, Loma Hermosa, Provincia de Buenos Aires, Argentina	-345547886358	-586064849049	21				21		open	false	gps	gps		General San MartÃ­n	Buenos Aires	Argentina	Buenos Aires	General San MartÃ­n	Babosa de hibernadero	Ambigolimax valentianus	Babosa de hibernadero	Mollusca	448331	Ambigolimax valentianus	Heterobranchia	Eupulmonata	Stylommatophora	Limacoidea
209108638	2024-04-23 20:53:56	2024-04-23	2024-04-23 23:53:56 UTC	Buenos Aires	4886524	ignaciocostagliola		2024-04-24 17:33:19 UTC	2024-04-24 17:41:52 UTC	research	CC-BY-NC	https://www.inaturalist.org/observations/209108638	https://inaturalist-open-data.s3.amazonaws.com/photos/370033950/medium.jpeg				1	0	false	2	Flores, Cdad. AutÃ³noma de Buenos Aires, Argentina	-346362579722	-58461139							open	false	gps	gps		Distrito Federal	Ciudad de Buenos Aires	Argentina	Ciudad de Buenos Aires	Distrito Federal	Babosa de hibernadero	Ambigolimax valentianus	Babosa de hibernadero	Mollusca	448331	Ambigolimax valentianus	Heterobranchia	Eupulmonata	Stylommatophora	Limacoidea
214079413	2024-05-06 19:41:35-03:00	2024-05-06	2024-05-06 22:41:35 UTC	Buenos Aires	7292486	glossopteris		2024-05-06 22:42:30 UTC	2024-05-06 23:43:48 UTC	research	CC-BY-NC	https://www.inaturalist.org/observations/214079413	https://inaturalist-open-data.s3.amazonaws.com/photos/378361357/medium.jpg				1	0	false	3	DublÃ­n, Buenos Aires, CABA, AR	-34583459165	-584806589469	13				13		open	false				Distrito Federal	Ciudad de Buenos Aires	Argentina	Ciudad de Buenos Aires	Distrito Federal	Babosa de hibernadero	Ambigolimax valentianus	Babosa de hibernadero	Mollusca	448331	Ambigolimax valentianus	Heterobranchia	Eupulmonata	Stylommatophora	Limacoidea
137231266	2022-10-01 16:31:23	2022-10-01	2022-10-01 19:31:23 UTC	America/Argentina/Ushuaia	4444997	fede_munoz	Federico MuÃ±oz	2022-10-02 02:10:57 UTC	2022-10-02 02:11:13 UTC	needs_id		https://www.inaturalist.org/observations/137231266	https://static.inaturalist.org/photos/234336529/medium.jpeg				0	0	false	2	Ushuaia, Tierra del Fuego, Argentina	-5481765	-681813333333								false	gps	gps		Ushuaia	Tierra del Fuego	Argentina	Tierra del Fuego	Ushuaia	Caracoles de tierra	Amphicyclotus	Caracoles de tierra	Mollusca	246689		Heterobranchia	Eupulmonata	Architaenioglossa	Cyclophoroidea
114915925	2022-05-01 11:24:00	2022-05-01	2022-05-01 14:24:00 UTC	America/Argentina/Cordoba	1111470	leoleiva	Leonardo AdriÃ¡n LEIVA	2022-05-02 22:58:50 UTC	2024-04-11 15:29:37 UTC	research	CC-BY-NC	https://www.inaturalist.org/observations/114915925	https://inaturalist-open-data.s3.amazonaws.com/photos/193990536/medium.jpeg				3	0	false		ColÃ³n 2130, Santo Tome (Dpto. La Capital), Santa Fe, Argentina	-316681287711	-607643775721	4				4			false				La Capital	Santa Fe	Argentina	Santa Fe	La Capital	Angustipes difficilis	Angustipes difficilis		Mollusca	1193767	Angustipes difficilis	Heterobranchia	Eupulmonata	Systellommatophora	Veronicelloidea
197897139	2024-01-14 21:09:45	2024-01-14	2024-01-15 00:09:45 UTC	America/Argentina/Cordoba	6263421	lucas_fornero	Lucas Fornero	2024-01-29 15:59:17 UTC	2024-01-31 02:54:05 UTC	research	CC-BY-NC	https://www.inaturalist.org/observations/197897139	https://inaturalist-open-data.s3.amazonaws.com/photos/348668422/medium.jpeg				1	0	false	2	Villa Ocampo, Santa Fe, Argentina	-285039998057	-593264545128	302				302			false	gps	gps		General Obligado	Santa Fe	Argentina	Santa Fe	General Obligado	Angustipes difficilis	Angustipes difficilis		Mollusca	1193767	Angustipes difficilis	Heterobranchia	Eupulmonata	Systellommatophora	Veronicelloidea
198321139	2024-01-28 08:28:00	2024-01-28	2024-01-28 11:28:00 UTC	America/Argentina/Cordoba	144	trekman	Gustavo Fernando DurÃ¡n	2024-02-03 20:08:41 UTC	2024-02-05 02:44:01 UTC	research	CC-BY-NC-SA	https://www.inaturalist.org/observations/198321139	https://inaturalist-open-data.s3.amazonaws.com/photos/349515333/medium.jpeg				1	0	false		San Jeronimo Nte., Santa Fe, Argentina	-315508321046	-610677500634	1934				1934			false				Las Colonias	Santa Fe	Argentina	Santa Fe	Las Colonias	Angustipes difficilis	Angustipes difficilis		Mollusca	1193767	Angustipes difficilis	Heterobranchia	Eupulmonata	Systellommatophora	Veronicelloidea
202967044	2024-03-18 09:33:57	2024-03-18	2024-03-18 12:33:57 UTC	America/Argentina/Cordoba	1205836	elbeltrocco	Eduardo Luis Beltrocco	2024-03-18 13:16:22 UTC	2024-05-22 01:28:16 UTC	research	CC-BY-NC	https://www.inaturalist.org/observations/202967044	https://inaturalist-open-data.s3.amazonaws.com/photos/358538192/medium.jpeg				2	0	false	2	Santa Fe de la Vera Cruz, Santa Fe, Argentina	-316075020382	-607245573029	4				4			false	gps	gps		La Capital	Santa Fe	Argentina	Santa Fe	La Capital	Angustipes difficilis	Angustipes difficilis		Mollusca	1193767	Angustipes difficilis	Heterobranchia	Eupulmonata	Systellommatophora	Veronicelloidea
20283998	2018-11-24 10:43:00	2018-11-24		Buenos Aires	472014	jjbonannod	Juan JosÃ© Bonanno	2019-02-11 18:57:46 UTC	2020-08-11 02:32:09 UTC	research	CC-BY-NC	https://www.inaturalist.org/observations/20283998	https://inaturalist-open-data.s3.amazonaws.com/photos/31313688/medium.jpg				2	0	false		Gdor. Virasoro, Corrientes, Argentina	-280543419	-560139884	2479				2479			false				Santo TomÃ©	Corrientes	Argentina	Corrientes	Santo TomÃ©	Anthinus albolabiatus	Anthinus albolabiatus		Mollusca	1074027	Anthinus albolabiatus	Heterobranchia	Eupulmonata	Stylommatophora	Rhytidoidea
122954348	2022-06-14 23:21:00	2022-06-14	2022-06-15 02:21:00 UTC	America/Argentina/Cordoba	1514402	hhulsberg	Hugo Hulsberg	2022-06-22 14:59:46 UTC	2022-07-14 11:52:33 UTC	research	CC-BY	https://www.inaturalist.org/observations/122954348	https://inaturalist-open-data.s3.amazonaws.com/photos/208237300/medium.jpg				2	0	false		GuaranÃ­, Misiones, Argentina	-266756077721	-54276216932	61				61			false				GuaranÃ­	Misiones	Argentina	Misiones	GuaranÃ­	Anthinus albolabiatus	Anthinus albolabiatus		Mollusca	1074027	Anthinus albolabiatus	Heterobranchia	Eupulmonata	Stylommatophora	Rhytidoidea
77657272	2017/01/24 2:16 PM CET	2017-01-24	2017-01-24 13:16:00 UTC	Madrid	174738	jacanteros	Javier A. Canteros	2021-05-06 20:48:02 UTC	2021-05-24 09:10:23 UTC	research	CC-BY-NC-SA	https://www.inaturalist.org/observations/77657272	https://static.inaturalist.org/photos/127000861/medium.jpg				3	0	false		FutaleufÃº, Chubut, Argentina	-426678991767	-716941797037	122				122		open	false				FutaleufÃº	Chubut	Argentina	Chubut	FutaleufÃº	Hedgehog Slug	Arion intermedius		Mollusca	214186	Arion intermedius	Heterobranchia	Eupulmonata	Stylommatophora	Arionoidea
107316714	2021-12-31 16:34:00	2021-12-31	2021-12-31 19:34:00 UTC	Buenos Aires	142253	carancho	Leonel Roget	2022-02-23 15:31:24 UTC	2023-07-28 20:03:41 UTC	research	CC-BY	https://www.inaturalist.org/observations/107316714	https://inaturalist-open-data.s3.amazonaws.com/photos/180467307/medium.jpeg				2	0	false		Los Lagos, NeuquÃ©n, Argentina	-408886698623	-714769740826	837				837		open	false				Los Lagos	NeuquÃ©n	Argentina	NeuquÃ©n	Los Lagos	Arion intermedius	Arion intermedius		Mollusca	214186	Arion intermedius	Heterobranchia	Eupulmonata	Stylommatophora	Arionoidea
111592930	2022-03-29 13:37:54	2022-03-29	2022-03-29 16:37:54 UTC	Buenos Aires	45711	ezattara	Eduardo E. Zattara	2022-04-16 00:53:43 UTC	2023-07-28 20:03:38 UTC	research	CC-BY-NC	https://www.inaturalist.org/observations/111592930	https://inaturalist-open-data.s3.amazonaws.com/photos/188401396/medium.jpeg				2	0	false	2	Bariloche Department, RÃ­o Negro, Argentina	-410252277778	-718183583333							open	false	gps	gps		Los Lagos	NeuquÃ©n	Argentina	NeuquÃ©n	Los Lagos	Hedgehog Slug	Arion intermedius		Mollusca	214186	Arion intermedius	Heterobranchia	Eupulmonata	Stylommatophora	Arionoidea
113164084	2022-04-26 11:51:58	2022-04-26	2022-04-26 14:51:58 UTC	America/Argentina/Ushuaia	4373573	david_nicolas_albo	david nicolÃ¡s albo	2022-04-28 00:47:29 UTC	2022-04-28 15:44:37 UTC	research		https://www.inaturalist.org/observations/113164084	https://static.inaturalist.org/photos/191203526/medium.jpeg				1	0	false	2	Ushuaia, Tierra del Fuego, Argentina	-54827196	-68355086							open	false	gps	gps		Ushuaia	Tierra del Fuego	Argentina	Tierra del Fuego	Ushuaia	Arion intermedius	Arion intermedius		Mollusca	214186	Arion intermedius	Heterobranchia	Eupulmonata	Stylommatophora	Arionoidea
220995679	2024-06-03 15:12:00	2024-06-03	2024-06-03 18:12:00 UTC	America/Argentina/Salta	5825420	tutitah	Julia Ariadna	2024-06-06 23:37:25 UTC	2024-06-07 18:09:03 UTC	research	CC0	https://www.inaturalist.org/observations/220995679	https://inaturalist-open-data.s3.amazonaws.com/photos/391283670/medium.jpeg				1	0	false		Lacar, LanÃ­n, NeuquÃ©n, Argentina	-401463555556	-713539277778	18				18		open	false				Lacar	NeuquÃ©n	Argentina	NeuquÃ©n	Lacar	Arion intermedius	Arion intermedius		Mollusca	214186	Arion intermedius	Heterobranchia	Eupulmonata	Stylommatophora	Arionoidea
37130720	2019-12-31 1:10:00 AM GMT-03:00	2019-12-31	2019-12-31 04:10:00 UTC	Brasilia	1424428	maurofossati	Mauro Fossati	2019-12-31 14:55:43 UTC	2023-07-07 16:26:16 UTC	research	CC-BY	https://www.inaturalist.org/observations/37130720	https://inaturalist-open-data.s3.amazonaws.com/photos/58812296/medium.jpg			Luego de lluvia	4	1	false	2	Villa Serrana La Gruta	-381650800306	-621868078038	2104				2104			false	gps	gps		Tornquist	Buenos Aires	Argentina	Buenos Aires	Tornquist	Austroborus dorbignyi	Austroborus dorbignyi		Mollusca	1032567	Austroborus dorbignyi	Heterobranchia	Eupulmonata	Stylommatophora	Rhytidoidea
38552195	Sat Dec 28 2019 19:10:45 GMT-0300 (GMT-3)	2019-12-28	2019-12-28 22:10:45 UTC	Buenos Aires	2551145	alfanova	ValentÃ­n Alfano	2020-02-11 23:28:38 UTC	2022-06-08 02:45:58 UTC	research	CC-BY-NC	https://www.inaturalist.org/observations/38552195	https://inaturalist-open-data.s3.amazonaws.com/photos/61288640/medium.jpg				1	0	false	3	AutovÃ­a BahÃ­a Blanca - Punta Alta, BahÃ­a Blanca, Buenos Aires, AR	-387733547516	-62139714055	34				34			false				BahÃ­a Blanca	Buenos Aires	Argentina	Buenos Aires	BahÃ­a Blanca	Austroborus dorbignyi	Austroborus dorbignyi		Mollusca	1032567	Austroborus dorbignyi	Heterobranchia	Eupulmonata	Stylommatophora	Rhytidoidea
73888750	Tue Apr 13 2021 16:38:38 GMT-0300 (GMT-3)	2021-04-13	2021-04-13 19:38:38 UTC	Buenos Aires	2551145	alfanova	ValentÃ­n Alfano	2021-04-13 22:42:53 UTC	2022-06-08 02:46:17 UTC	research	CC-BY-NC	https://www.inaturalist.org/observations/73888750	https://inaturalist-open-data.s3.amazonaws.com/photos/120693430/medium.jpg				2	0	false	3	Tornquist, Tornquist, Buenos Aires, AR	-380664555	-6187308667	5				5			false				Tornquist	Buenos Aires	Argentina	Buenos Aires	Tornquist	Austroborus dorbignyi	Austroborus dorbignyi		Mollusca	1032567	Austroborus dorbignyi	Heterobranchia	Eupulmonata	Stylommatophora	Rhytidoidea
123887951	2022-06-27 13:46:00	2022-06-27	2022-06-27 16:46:00 UTC	Buenos Aires	2479819	el-naturalista	El Naturalista	2022-06-28 21:36:20 UTC	2023-07-06 21:01:14 UTC	research	CC-BY-NC	https://www.inaturalist.org/observations/123887951	https://inaturalist-open-data.s3.amazonaws.com/photos/209925561/medium.jpg				1	0	false		Saavedra, Provincia de Buenos Aires, Argentina	-377344966977	-622422492948	244				244			false				Saavedra	Buenos Aires	Argentina	Buenos Aires	Saavedra	Austroborus dorbignyi	Austroborus dorbignyi		Mollusca	1032567	Austroborus dorbignyi	Heterobranchia	Eupulmonata	Stylommatophora	Rhytidoidea
123894727	2022-06-27 11:56:00	2022-06-27	2022-06-27 14:56:00 UTC	Buenos Aires	2479819	el-naturalista	El Naturalista	2022-06-28 22:36:07 UTC	2023-01-08 04:38:16 UTC	research	CC-BY-NC	https://www.inaturalist.org/observations/123894727	https://inaturalist-open-data.s3.amazonaws.com/photos/209937565/medium.jpg			Fenotipo muy distinto al mÃ¡s austral, el cual pierde el periÃ³straco antes de llegar a la adultÃ©z, siendo de rosado claro a blanco y con la.boca rosada o naranja muy claro.	1	0	false		Saavedra, Provincia de Buenos Aires, Argentina	-377415353322	-622439740892	488				488			false				Saavedra	Buenos Aires	Argentina	Buenos Aires	Saavedra	Austroborus dorbignyi	Austroborus dorbignyi		Mollusca	1032567	Austroborus dorbignyi	Heterobranchia	Eupulmonata	Stylommatophora	Rhytidoidea
169821656	2023-06-20 12:43:29-03:00	2023-06-20	2023-06-20 15:43:29 UTC	Buenos Aires	2551145	alfanova	ValentÃ­n Alfano	2023-06-27 19:15:46 UTC	2023-07-01 11:39:05 UTC	research	CC-BY-NC	https://www.inaturalist.org/observations/169821656	https://inaturalist-open-data.s3.amazonaws.com/photos/294455532/medium.jpg				2	0	false	3	Coronel de Marina Leonardo Rosales, Buenos Aires, AR	-387923473235	-621384183295	20				20			false				Coronel de Marina Leonardo Rosales	Buenos Aires	Argentina	Buenos Aires	Coronel de Marina Leonardo Rosales	Austroborus dorbignyi	Austroborus dorbignyi		Mollusca	1032567	Austroborus dorbignyi	Heterobranchia	Eupulmonata	Stylommatophora	Rhytidoidea
190093382	2023-11-05 08:41:40	2023-11-05	2023-11-05 11:41:40 UTC	Buenos Aires	5289074	vgsaladiaz		2023-11-05 17:42:12 UTC	2023-11-08 00:32:48 UTC	research	CC-BY-NC	https://www.inaturalist.org/observations/190093382	https://inaturalist-open-data.s3.amazonaws.com/photos/333162397/medium.jpeg				2	0	false	2	Coronel de Marina Leonardo Rosales, Provincia de Buenos Aires, Argentina	-38789889051	-621319479123	191				191			false	gps	gps		Coronel de Marina Leonardo Rosales	Buenos Aires	Argentina	Buenos Aires	Coronel de Marina Leonardo Rosales	Austroborus dorbignyi	Austroborus dorbignyi		Mollusca	1032567	Austroborus dorbignyi	Heterobranchia	Eupulmonata	Stylommatophora	Rhytidoidea
194527097	2023-12-21 11:22:23-03:00	2023-12-21	2023-12-21 14:22:23 UTC	Buenos Aires	2551145	alfanova	ValentÃ­n Alfano	2023-12-21 20:36:13 UTC	2024-01-01 20:06:53 UTC	research	CC-BY-NC	https://www.inaturalist.org/observations/194527097	https://inaturalist-open-data.s3.amazonaws.com/photos/341959179/medium.jpg				1	0	false	3	Punta Alta, Buenos Aires Province, AR	-38917205	-620614195	5				5			false				Coronel de Marina Leonardo Rosales	Buenos Aires	Argentina	Buenos Aires	Coronel de Marina Leonardo Rosales	Austroborus dorbignyi	Austroborus dorbignyi		Mollusca	1032567	Austroborus dorbignyi	Heterobranchia	Eupulmonata	Stylommatophora	Rhytidoidea
194759113	2023-12-15 13:59:06	2023-12-15	2023-12-15 16:59:06 UTC	Buenos Aires	2924353	damianganime	DamiÃ¡n Ganime	2023-12-24 19:06:48 UTC	2024-02-25 22:37:56 UTC	research	CC-BY-NC	https://www.inaturalist.org/observations/194759113	https://inaturalist-open-data.s3.amazonaws.com/photos/342433676/medium.jpeg				1	0	false	2	Buenos Aires, AR	-381230295253	-621844627347	10				28300	obscured		true	gps	gps		Tornquist	Buenos Aires	Argentina	Buenos Aires	Tornquist	Austroborus dorbignyi	Austroborus dorbignyi		Mollusca	1032567	Austroborus dorbignyi	Heterobranchia	Eupulmonata	Stylommatophora	Rhytidoidea
195365305	2023-12-14 18:04:35	2023-12-14	2023-12-14 21:04:35 UTC	Buenos Aires	7367766	abelpontoriero	Abel Pontoriero	2023-12-31 13:33:20 UTC	2024-01-10 17:06:05 UTC	research		https://www.inaturalist.org/observations/195365305	https://static.inaturalist.org/photos/343675468/medium.jpeg				2	0	false	2	BahÃ­a Blanca, Provincia de Buenos Aires, Argentina	-385623805556	-625502416667								false	gps	gps		BahÃ­a Blanca	Buenos Aires	Argentina	Buenos Aires	BahÃ­a Blanca	Austroborus dorbignyi	Austroborus dorbignyi		Mollusca	1032567	Austroborus dorbignyi	Heterobranchia	Eupulmonata	Stylommatophora	Rhytidoidea
209025695	2024-04-23 10:09:00	2024-04-23	2024-04-23 13:09:00 UTC	Buenos Aires	2551145	alfanova	ValentÃ­n Alfano	2024-04-24 04:02:23 UTC	2024-04-24 12:44:23 UTC	research	CC-BY-NC	https://www.inaturalist.org/observations/209025695	https://inaturalist-open-data.s3.amazonaws.com/photos/369878778/medium.jpeg				1	0	false		BahÃ­a Blanca, Provincia de Buenos Aires, Argentina	-387694250835	-621734793568	75				75			false				BahÃ­a Blanca	Buenos Aires	Argentina	Buenos Aires	BahÃ­a Blanca	Austroborus dorbignyi	Austroborus dorbignyi		Mollusca	1032567	Austroborus dorbignyi	Heterobranchia	Eupulmonata	Stylommatophora	Rhytidoidea
209025700	2024-04-23 11:42:00	2024-04-23	2024-04-23 14:42:00 UTC	Buenos Aires	2551145	alfanova	ValentÃ­n Alfano	2024-04-24 04:02:24 UTC	2024-04-24 12:44:03 UTC	research	CC-BY-NC	https://www.inaturalist.org/observations/209025700	https://inaturalist-open-data.s3.amazonaws.com/photos/369881181/medium.jpeg			debajo de Opuntia	1	0	false		BahÃ­a Blanca, Provincia de Buenos Aires, Argentina	-387721617137	-621713331051	45				45			false				BahÃ­a Blanca	Buenos Aires	Argentina	Buenos Aires	BahÃ­a Blanca	Austroborus dorbignyi	Austroborus dorbignyi		Mollusca	1032567	Austroborus dorbignyi	Heterobranchia	Eupulmonata	Stylommatophora	Rhytidoidea
210096404	2024-04-26 09:37:50	2024-04-26	2024-04-26 12:37:50 UTC	Buenos Aires	6128271	madreporita	Franco Bostal	2024-04-27 12:03:59 UTC	2024-04-28 21:02:45 UTC	research		https://www.inaturalist.org/observations/210096404	https://static.inaturalist.org/photos/371673009/medium.jpeg				1	0	false	2	Tornquist, Provincia de Buenos Aires, Argentina	-380574093371	-619712685049	196				196			false	gps	gps		Tornquist	Buenos Aires	Argentina	Buenos Aires	Tornquist	Austroborus dorbignyi	Austroborus dorbignyi		Mollusca	1032567	Austroborus dorbignyi	Heterobranchia	Eupulmonata	Stylommatophora	Rhytidoidea
217979996	2024-05-24 17:27:57-03:00	2024-05-24	2024-05-24 20:27:57 UTC	Buenos Aires	2551145	alfanova	ValentÃ­n Alfano	2024-05-24 21:29:57 UTC	2024-06-08 23:19:49 UTC	research	CC-BY-NC	https://www.inaturalist.org/observations/217979996	https://inaturalist-open-data.s3.amazonaws.com/photos/385682660/medium.jpg			con restos de periostraco	1	0	false	3	Paseo Urbano Juan Domingo PerÃ³n, BahÃ­a Blanca, Buenos Aires Province, AR	-3868927	-6225724167	5				5			false				BahÃ­a Blanca	Buenos Aires	Argentina	Buenos Aires	BahÃ­a Blanca	Austroborus dorbignyi	Austroborus dorbignyi		Mollusca	1032567	Austroborus dorbignyi	Heterobranchia	Eupulmonata	Stylommatophora	Rhytidoidea
221181410	2024-06-07 10:13:33	2024-06-07	2024-06-07 13:13:33 UTC	Buenos Aires	5289074	vgsaladiaz		2024-06-07 21:41:14 UTC	2024-06-08 23:18:36 UTC	research	CC-BY-NC	https://www.inaturalist.org/observations/221181410	https://inaturalist-open-data.s3.amazonaws.com/photos/391675625/medium.jpeg				2	0	false	2	Coronel de Marina Leonardo Rosales, Provincia de Buenos Aires, Argentina	-389149932778	-620650787222								false	gps	gps		Coronel de Marina Leonardo Rosales	Buenos Aires	Argentina	Buenos Aires	Coronel de Marina Leonardo Rosales	Austroborus dorbignyi	Austroborus dorbignyi		Mollusca	1032567	Austroborus dorbignyi	Heterobranchia	Eupulmonata	Stylommatophora	Rhytidoidea
30041592	Fri Aug 02 2019 11:41:28 GMT-0300 (GMT-3)	2019-08-02	2019-08-02 14:41:28 UTC	Brasilia	1665115	a_huenulefalonso		2019-08-02 14:43:30 UTC	2023-01-17 22:18:22 UTC	needs_id	CC-BY-NC	https://www.inaturalist.org/observations/30041592	https://inaturalist-open-data.s3.amazonaws.com/photos/46913810/medium.jpg				1	0	false	3	Calle Noruega 2301â€“2399, Posadas, Provincia de Misiones, AR	-27394705275	-559030546884	13348				13348			false				Capital	Misiones	Argentina	Misiones	Capital	Belocaulus	Belocaulus angustipes	Babosa sudamericana de terciopelo negro	Mollusca	328068	Belocaulus angustipes	Heterobranchia	Eupulmonata	Systellommatophora	Veronicelloidea
191485321	2023-11-06 21:11:00	2023-11-06	2023-11-07 00:11:00 UTC	America/Argentina/Tucuman	3669123	pabloscazzina		2023-11-19 16:49:11 UTC	2023-11-19 16:49:45 UTC	needs_id	CC-BY-NC	https://www.inaturalist.org/observations/191485321	https://inaturalist-open-data.s3.amazonaws.com/photos/335935056/medium.jpg				0	0	false		Chicligasta, TucumÃ¡n, Argentina	-272823373753	-659656624158	8				8			false				Chicligasta	TucumÃ¡n	Argentina	TucumÃ¡n	Chicligasta	Babosa Sudamericana de Terciopelo Negro	Belocaulus angustipes	Babosa sudamericana de terciopelo negro	Mollusca	328068	Belocaulus angustipes	Heterobranchia	Eupulmonata	Systellommatophora	Veronicelloidea
194531041	2023-12-21 18:38:44	2023-12-21	2023-12-21 21:38:44 UTC	Buenos Aires	7348633	gisestroh	Gise Stroh	2023-12-21 21:40:51 UTC	2023-12-21 23:34:16 UTC	needs_id	CC-BY-NC	https://www.inaturalist.org/observations/194531041	https://inaturalist-open-data.s3.amazonaws.com/photos/341967010/medium.jpeg				0	0	false	2	Coronel SuÃ¡rez, AR-BA, AR	-374510165	-6194004541	6				6			false				Coronel SuÃ¡rez	Buenos Aires	Argentina	Buenos Aires	Coronel SuÃ¡rez	Babosa sudamericana de terciopelo negro	Belocaulus angustipes	Babosa sudamericana de terciopelo negro	Mollusca	328068	Belocaulus angustipes	Heterobranchia	Eupulmonata	Systellommatophora	Veronicelloidea
43151183	2020-04-24 16:30:00	2020-04-24	2020-04-24 20:30:00 UTC	Santiago	2829502	vivianlillo		2020-04-24 19:32:00 UTC	2022-02-25 18:00:27 UTC	research	CC-BY-NC	https://www.inaturalist.org/observations/43151183	https://inaturalist-open-data.s3.amazonaws.com/photos/68498193/medium.jpg				2	0	false		TafÃ­ Viejo, TucumÃ¡n, Argentina	-267408580833	-652579513889								false				TafÃ­ Viejo	TucumÃ¡n	Argentina	TucumÃ¡n	TafÃ­ Viejo	Bostryx stelzneri	Bostryx stelzneri		Mollusca	1263310	Bostryx stelzneri	Heterobranchia	Eupulmonata	Stylommatophora	Orthalicoidea
18397744	2018-10-17 08:10:00	2018-10-17		Buenos Aires	144	trekman	Gustavo Fernando DurÃ¡n	2018-11-14 21:38:19 UTC	2023-08-10 06:47:03 UTC	research	CC-BY-NC-SA	https://www.inaturalist.org/observations/18397744	https://inaturalist-open-data.s3.amazonaws.com/photos/28119976/medium.jpeg				3	0	false		Puerto IguazÃº, MisiÃ³nes, Argentina	-256090716309	-545607566488	31				31			false				IguazÃº	Misiones	Argentina	Misiones	IguazÃº	Bradybaena similaris	Bradybaena similaris		Mollusca	215409	Bradybaena similaris	Heterobranchia	Eupulmonata	Stylommatophora	Helicoidea
23135529	2019-04-26 9:42:05 a. m. GMT-03:00	2019-04-26	2019-04-26 12:42:05 UTC	Brasilia	1671848	matiasbenitez	Matias Benitez	2019-04-26 14:20:40 UTC	2023-08-10 06:39:27 UTC	research		https://www.inaturalist.org/observations/23135529	https://static.inaturalist.org/photos/35861928/medium.jpeg				3	0	false	2	H Quiroga 1791, Montecarlo, MisiÃ³nes, Argentina	-265659188	-547636848	21				21			false				Montecarlo	Misiones	Argentina	Misiones	Montecarlo	Asian Tramp Snail	Bradybaena similaris		Mollusca	215409	Bradybaena similaris	Heterobranchia	Eupulmonata	Stylommatophora	Helicoidea
23359036	2019-04-27 10:36:16 AM GMT-03:00	2019-04-27	2019-04-27 13:36:16 UTC	Brasilia	1663473	juanantonio13	Juan Antonio Martinez Duarte	2019-04-27 13:37:53 UTC	2023-08-10 06:52:32 UTC	research		https://www.inaturalist.org/observations/23359036	https://static.inaturalist.org/photos/36185814/medium.jpeg				3	0	false	2	Av. San MartÃ­n Oeste 2616, Eldorado, MisiÃ³nes, Argentina	-2640779771	-546694353	16				16			false				Eldorado	Misiones	Argentina	Misiones	Eldorado	Asian Tramp Snail	Bradybaena similaris		Mollusca	215409	Bradybaena similaris	Heterobranchia	Eupulmonata	Stylommatophora	Helicoidea
23543641	2019/04/27 2:21 AM UTC	2019-04-27		UTC	1574372	irisfigueredo	Iris Figueredo	2019-04-28 02:22:22 UTC	2023-08-10 06:35:48 UTC	research		https://www.inaturalist.org/observations/23543641	https://static.inaturalist.org/photos/36455202/medium.jpeg				3	0	false		Montecarlo, MisiÃ³nes, Argentina	-265716167	-547413116	3713				3713			false				Montecarlo	Misiones	Argentina	Misiones	Montecarlo	Bradybaena similaris	Bradybaena similaris		Mollusca	215409	Bradybaena similaris	Heterobranchia	Eupulmonata	Stylommatophora	Helicoidea
23604781	2019-04-26 08:13:00	2019-04-26	2019-04-26 11:13:00 UTC	Brasilia	1574372	irisfigueredo	Iris Figueredo	2019-04-28 11:14:25 UTC	2023-08-10 06:35:49 UTC	research		https://www.inaturalist.org/observations/23604781	https://static.inaturalist.org/photos/36546408/medium.jpg				4	0	false		Montecarlo, MisiÃ³nes, Argentina	-265716167	-547413116	3713				3713			false				Montecarlo	Misiones	Argentina	Misiones	Montecarlo	Bradybaena similaris	Bradybaena similaris		Mollusca	215409	Bradybaena similaris	Heterobranchia	Eupulmonata	Stylommatophora	Helicoidea
23694381	2019-04-28 2:46:13 PM ART	2019-04-28	2019-04-28 17:46:13 UTC	Buenos Aires	1668501	inocencior	Inocencio Rodriguez	2019-04-28 18:19:32 UTC	2023-08-10 06:35:49 UTC	research	CC-BY-NC	https://www.inaturalist.org/observations/23694381	https://inaturalist-open-data.s3.amazonaws.com/photos/36670808/medium.jpg				4	0	false	2	AntÃ¡rtida Argentina 126, Puerto IguazÃº, MisiÃ³nes, Argentina	-256198298454	-545866800472	132				132			false	gps	gps		IguazÃº	Misiones	Argentina	Misiones	IguazÃº	Bradybaena similaris	Bradybaena similaris		Mollusca	215409	Bradybaena similaris	Heterobranchia	Eupulmonata	Stylommatophora	Helicoidea
23709463	2019/04/28 7:17 PM UTC	2019-04-28		UTC	1574372	irisfigueredo	Iris Figueredo	2019-04-28 19:18:17 UTC	2023-08-10 06:35:49 UTC	research		https://www.inaturalist.org/observations/23709463	https://static.inaturalist.org/photos/36692210/medium.jpg				4	0	false		Montecarlo, MisiÃ³nes, Argentina	-265716167	-547413116	3713				3713			false				Montecarlo	Misiones	Argentina	Misiones	Montecarlo	Bradybaena similaris	Bradybaena similaris		Mollusca	215409	Bradybaena similaris	Heterobranchia	Eupulmonata	Stylommatophora	Helicoidea
35960775	2019-11-14 9:35:33 AM GMT-03:00	2019-11-14	2019-11-14 12:35:33 UTC	Brasilia	2455902	marialourcabrera	MariaLour	2019-11-22 22:39:38 UTC	2023-08-10 06:35:54 UTC	research	CC-BY-NC	https://www.inaturalist.org/observations/35960775	https://inaturalist-open-data.s3.amazonaws.com/photos/56776477/medium.jpeg				3	0	false	2	Departamento Capital (TucumÃ¡n), TucumÃ¡n, Argentina	-268015005376	-652275004238	71049				71049			false	gps	gps		Capital	TucumÃ¡n	Argentina	TucumÃ¡n	Capital	Bradybaena similaris	Bradybaena similaris		Mollusca	215409	Bradybaena similaris	Heterobranchia	Eupulmonata	Stylommatophora	Helicoidea
38161454	2020-01-31 8:49:27 PM GMT-03:00	2020-01-31	2020-01-31 23:49:27 UTC	Brasilia	2505749	virili-lvx	Lucas Virili	2020-01-31 23:57:29 UTC	2023-08-10 07:11:43 UTC	research	CC-BY-NC-SA	https://www.inaturalist.org/observations/38161454	https://static.inaturalist.org/photos/60610908/medium.jpeg				2	0	false	2	General Obligado, AR-SF, AR	-290026550569	-59762435479	4208				29533	obscured		true	gps	gps		General Obligado	Santa Fe	Argentina	Santa Fe	General Obligado	Bradybaena similaris	Bradybaena similaris		Mollusca	215409	Bradybaena similaris	Heterobranchia	Eupulmonata	Stylommatophora	Helicoidea
43481058	Fri Apr 24 2020 18:10:28 GMT-0300 (GMT-3)	2020-04-24	2020-04-24 21:10:28 UTC	Brasilia	2833432	josefina31	Josefina Viejobueno	2020-04-25 23:09:07 UTC	2023-08-10 06:35:56 UTC	research		https://www.inaturalist.org/observations/43481058	https://static.inaturalist.org/photos/68987758/medium.jpg			Caracol en ventana	4	0	false	3	PerÃº, Yerba Buena, TucumÃ¡n, AR	-2680896167	-6528315833	10				10			false				Yerba Buena	TucumÃ¡n	Argentina	TucumÃ¡n	Yerba Buena	Bradybaena similaris	Bradybaena similaris		Mollusca	215409	Bradybaena similaris	Heterobranchia	Eupulmonata	Stylommatophora	Helicoidea
43677238	2020-04-26 2:54:08 PM GMT-03:00	2020-04-26	2020-04-26 17:54:08 UTC	Brasilia	2832029	andreaestevez	Andrea Estevez	2020-04-26 17:54:41 UTC	2023-08-10 06:35:56 UTC	research		https://www.inaturalist.org/observations/43677238	https://static.inaturalist.org/photos/69282633/medium.jpeg			CaparazÃ³n de caracol	4	0	false	2	Departamento Capital (TucumÃ¡n), TucumÃ¡n, Argentina	-2682844746	-6519710049	9				9			false				Capital	TucumÃ¡n	Argentina	TucumÃ¡n	Capital	Asian Tramp Snail	Bradybaena similaris		Mollusca	215409	Bradybaena similaris	Heterobranchia	Eupulmonata	Stylommatophora	Helicoidea
43911869	2020-04-27 12:40:06 PM GMT-03:00	2020-04-27	2020-04-27 15:40:06 UTC	Brasilia	2844049	claudiasilvanasolis	claudia silvana solis	2020-04-27 15:43:55 UTC	2023-08-10 07:17:21 UTC	research		https://www.inaturalist.org/observations/43911869	https://static.inaturalist.org/photos/69636095/medium.jpeg				2	0	false	2	AristÃ³bulo del Valle, Misiones, Argentina	-271083719722	-54874786								false	gps	gps		CainguÃ¡s	Misiones	Argentina	Misiones	CainguÃ¡s	Asian Tramp Snail	Bradybaena similaris		Mollusca	215409	Bradybaena similaris	Heterobranchia	Eupulmonata	Stylommatophora	Helicoidea
43927118	2020-04-26 17:21:00	2020-04-26	2020-04-26 20:21:00 UTC	Buenos Aires	2505749	virili-lvx	Lucas Virili	2020-04-27 16:51:15 UTC	2023-08-10 07:17:21 UTC	research	CC-BY-NC-SA	https://www.inaturalist.org/observations/43927118	https://static.inaturalist.org/photos/69658640/medium.jpg				3	0	false		General Obligado, AR-SF, AR	-290087227581	-596838709052	2918				29533	obscured		true				General Obligado	Santa Fe	Argentina	Santa Fe	General Obligado	Bradybaena similaris	Bradybaena similaris		Mollusca	215409	Bradybaena similaris	Heterobranchia	Eupulmonata	Stylommatophora	Helicoidea
43967526	2020-04-27 3:30:40 PM GMT-03:00	2020-04-27	2020-04-27 18:30:40 UTC	Brasilia	2449026	macarenacy	Macarena Cardenas Ypa	2020-04-27 19:43:18 UTC	2023-08-10 07:17:25 UTC	research		https://www.inaturalist.org/observations/43967526	https://static.inaturalist.org/photos/69721488/medium.jpeg				4	0	false	2	Yerba Buena, AR-TM, AR	-268067577935	-653278834373	11				11			false	gps	gps		Yerba Buena	TucumÃ¡n	Argentina	TucumÃ¡n	Yerba Buena	Bradybaena similaris	Bradybaena similaris		Mollusca	215409	Bradybaena similaris	Heterobranchia	Eupulmonata	Stylommatophora	Helicoidea
53089310	2017-06-13	2017-06-13		Pacific Time (US & Canada)	1772002	thomaseverest	Thomas Everest	2020-07-14 20:39:07 UTC	2023-08-10 07:26:53 UTC	research	CC-BY-NC	https://www.inaturalist.org/observations/53089310	https://inaturalist-open-data.s3.amazonaws.com/photos/84300068/medium.jpg			Under bushes	2	0	false		Los Lapachos 584, Puerto IguazÃº, Misiones, Argentina	-25607786	-54569204								false				IguazÃº	Misiones	Argentina	Misiones	IguazÃº	Asian Tramp Snail	Bradybaena similaris		Mollusca	215409	Bradybaena similaris	Heterobranchia	Eupulmonata	Stylommatophora	Helicoidea
92513658	2010-03-20 20:58:00	2010-03-20	2010-03-20 23:58:00 UTC	Brasilia	1514402	hhulsberg	Hugo Hulsberg	2021-08-25 22:10:07 UTC	2023-08-10 06:36:09 UTC	research	CC-BY	https://www.inaturalist.org/observations/92513658	https://inaturalist-open-data.s3.amazonaws.com/photos/153191305/medium.jpeg				2	0	false		Puerto IguazÃº, Misiones, Argentina	-256230880816	-545531167778	122				122			false				IguazÃº	Misiones	Argentina	Misiones	IguazÃº	Bradybaena similaris	Bradybaena similaris		Mollusca	215409	Bradybaena similaris	Heterobranchia	Eupulmonata	Stylommatophora	Helicoidea
105685120	2022-01-27 19:34:23	2022-01-27	2022-01-27 19:34:23 UTC	UTC	5294338	katy262	Katy berlanda	2022-01-27 22:36:30 UTC	2023-08-10 06:36:14 UTC	research		https://www.inaturalist.org/observations/105685120	https://static.inaturalist.org/photos/177377679/medium.jpeg				2	0	false	2	Avellaneda, Santa Fe, Argentina	-2911704825	-596619376944								false				General Obligado	Santa Fe	Argentina	Santa Fe	General Obligado	Asian Tramp Snail	Bradybaena similaris		Mollusca	215409	Bradybaena similaris	Heterobranchia	Eupulmonata	Stylommatophora	Helicoidea
109133288	2022-03-19 10:10:11	2022-03-19	2022-03-19 13:10:11 UTC	Brasilia	438241	soolquipildor	Sol Quipildor	2022-03-21 10:48:57 UTC	2023-08-10 06:36:17 UTC	research	CC-BY-SA	https://www.inaturalist.org/observations/109133288	https://inaturalist-open-data.s3.amazonaws.com/photos/183878648/medium.jpeg				4	0	false	2	Puerto IguazÃº, Misiones, Argentina	-256002554	-545775824997								false	gps	gps		IguazÃº	Misiones	Argentina	Misiones	IguazÃº	Bradybaena similaris	Bradybaena similaris		Mollusca	215409	Bradybaena similaris	Heterobranchia	Eupulmonata	Stylommatophora	Helicoidea
109316945	2021-09-20 09:36:00	2021-09-20	2021-09-20 12:36:00 UTC	Buenos Aires	2481121	bahianoayala	Bahiano Ayala	2022-03-23 20:35:32 UTC	2023-08-10 08:15:43 UTC	research	CC-BY	https://www.inaturalist.org/observations/109316945	https://inaturalist-open-data.s3.amazonaws.com/photos/184220632/medium.jpg				1	0	false		Banfield, Provincia de Buenos Aires, Argentina	-347339122019	-584152018933	2				2			false				LanÃºs	Buenos Aires	Argentina	Buenos Aires	LanÃºs	Bradybaena similaris	Bradybaena similaris		Mollusca	215409	Bradybaena similaris	Heterobranchia	Eupulmonata	Stylommatophora	Helicoidea
113442507	2022-04-27 13:28:19	2022-04-27	2022-04-27 16:28:19 UTC	America/Argentina/Tucuman	5247061	kuroulysses	Ulises Dantes	2022-04-29 15:52:38 UTC	2023-08-10 06:36:21 UTC	research		https://www.inaturalist.org/observations/113442507	https://static.inaturalist.org/photos/191658667/medium.jpeg				2	0	false	2	TafÃ­ Viejo	-267324147906	-652670288086	3034				3034			false	gps	gps		TafÃ­ Viejo	TucumÃ¡n	Argentina	TucumÃ¡n	TafÃ­ Viejo	Asian Tramp Snail	Bradybaena similaris		Mollusca	215409	Bradybaena similaris	Heterobranchia	Eupulmonata	Stylommatophora	Helicoidea
114384017	2022-05-01 11:08:08	2022-05-01	2022-05-01 14:08:08 UTC	America/Argentina/Tucuman	5602488	aechalup		2022-05-01 20:34:09 UTC	2023-08-10 06:36:21 UTC	research	CC-BY-NC	https://www.inaturalist.org/observations/114384017	https://inaturalist-open-data.s3.amazonaws.com/photos/193158340/medium.jpeg				4	0	false	2	Villa Carmela, TucumÃ¡n, Argentina	-267659449722	-6528346								false	gps	gps		Yerba Buena	TucumÃ¡n	Argentina	TucumÃ¡n	Yerba Buena	Bradybaena similaris	Bradybaena similaris		Mollusca	215409	Bradybaena similaris	Heterobranchia	Eupulmonata	Stylommatophora	Helicoidea
136925462	2022-09-29 09:16:38	2022-09-29	2022-09-29 12:16:38 UTC	America/Argentina/Cordoba	4531093	marquitos_pereyra	Marcos Pereyra	2022-09-29 16:05:19 UTC	2023-08-10 08:38:55 UTC	research		https://www.inaturalist.org/observations/136925462	https://static.inaturalist.org/photos/233763764/medium.jpeg				1	0	false	2	OberÃ¡, Misiones, Argentina	-274801424514	-551241447777	19				19			false	gps	gps		OberÃ¡	Misiones	Argentina	Misiones	OberÃ¡	Bradybaena similaris	Bradybaena similaris		Mollusca	215409	Bradybaena similaris	Heterobranchia	Eupulmonata	Stylommatophora	Helicoidea
140092584	2022-10-26 08:46:52	2022-10-26	2022-10-26 11:46:52 UTC	America/Argentina/Cordoba	4016462	nachopopurri	Nacho PavÃ­a	2022-10-26 20:32:57 UTC	2023-08-20 00:00:42 UTC	research	CC-BY-NC	https://www.inaturalist.org/observations/140092584	https://inaturalist-open-data.s3.amazonaws.com/photos/239747240/medium.jpeg				2	0	false	2	Posadas, Misiones, Argentina	-273586871997	-559138549997								false	gps	gps		Capital	Misiones	Argentina	Misiones	Capital	Bradybaena similaris	Bradybaena similaris		Mollusca	215409	Bradybaena similaris	Heterobranchia	Eupulmonata	Stylommatophora	Helicoidea
140672674	2022-10-31 10:52:54	2022-10-31	2022-10-31 13:52:54 UTC	America/Argentina/Tucuman	6215418	mauro_alejandro	Mauro Alejandro Singh	2022-10-31 16:51:31 UTC	2023-08-10 08:41:24 UTC	research		https://www.inaturalist.org/observations/140672674	https://static.inaturalist.org/photos/240831552/medium.jpeg				2	0	false	2	FundaciÃ³n Miguel Lillo	-268314416117	-652211824805	203				203			false	gps	gps		Capital	TucumÃ¡n	Argentina	TucumÃ¡n	Capital	Asian Tramp Snail	Bradybaena similaris		Mollusca	215409	Bradybaena similaris	Heterobranchia	Eupulmonata	Stylommatophora	Helicoidea
140688275	2022-10-31 16:13:00	2022-10-31	2022-10-31 19:13:00 UTC	America/Argentina/Cordoba	2479819	el-naturalista	El Naturalista	2022-10-31 19:22:17 UTC	2023-08-10 08:41:24 UTC	research	CC-BY-NC	https://www.inaturalist.org/observations/140688275	https://inaturalist-open-data.s3.amazonaws.com/photos/240860876/medium.jpg				3	0	false		Posadas, Misiones, Argentina	-273756102978	-558876170852	15				15			false				Capital	Misiones	Argentina	Misiones	Capital	Bradybaena similaris	Bradybaena similaris		Mollusca	215409	Bradybaena similaris	Heterobranchia	Eupulmonata	Stylommatophora	Helicoidea
140692741	2022-10-23 19:56:00	2022-10-23	2022-10-23 22:56:00 UTC	America/Argentina/Cordoba	2479819	el-naturalista	El Naturalista	2022-10-31 19:58:55 UTC	2023-08-10 08:41:25 UTC	research	CC-BY-NC	https://www.inaturalist.org/observations/140692741	https://inaturalist-open-data.s3.amazonaws.com/photos/240868815/medium.jpg				3	0	false		Posadas, Misiones, Argentina	-273968912294	-559148698616	61				61			false				Capital	Misiones	Argentina	Misiones	Capital	Bradybaena similaris	Bradybaena similaris		Mollusca	215409	Bradybaena similaris	Heterobranchia	Eupulmonata	Stylommatophora	Helicoidea
140702211	2022-10-30 18:39:12	2022-10-30	2022-10-30 21:39:12 UTC	America/Argentina/Cordoba	6283845	gabriela1019	Gabriela Scholles	2022-10-31 21:24:05 UTC	2023-08-10 06:36:41 UTC	research		https://www.inaturalist.org/observations/140702211	https://static.inaturalist.org/photos/240885911/medium.jpeg				2	0	false	2	Puerto Esperanza, Misiones, Argentina	-260156333997	-5460557								false	gps	gps		IguazÃº	Misiones	Argentina	Misiones	IguazÃº	Asian Tramp Snail	Bradybaena similaris		Mollusca	215409	Bradybaena similaris	Heterobranchia	Eupulmonata	Stylommatophora	Helicoidea
148479711	2018-02-25 13:34:00	2018-02-25	2018-02-25 16:34:00 UTC	America/Argentina/Cordoba	4355072	ricardomoyano	Ricardo D. Moyano	2023-02-10 23:09:22 UTC	2023-08-10 06:36:50 UTC	research	CC-BY-NC	https://www.inaturalist.org/observations/148479711	https://inaturalist-open-data.s3.amazonaws.com/photos/255697777/medium.jpeg				2	0	false		GuaranÃ­, Misiones, Argentina	-272001594938	-540175257186	15				15			false				GuaranÃ­	Misiones	Argentina	Misiones	GuaranÃ­	Bradybaena similaris	Bradybaena similaris		Mollusca	215409	Bradybaena similaris	Heterobranchia	Eupulmonata	Stylommatophora	Helicoidea
1106028	2009-02-05	2009-02-05		Buenos Aires	50445	nicoolejnik	Nicolas Olejnik	2014-12-01 18:00:33 UTC	2020-09-25 17:56:02 UTC	research	CC-BY-NC	http://www.inaturalist.org/observations/1106028	https://inaturalist-open-data.s3.amazonaws.com/photos/1390397/medium.JPG				0	0	false		Vuelta de Obligado	-33.596721	-59.81162	106				106			FALSE				San Pedro	Buenos Aires	Argentina	Buenos Aires	San Pedro	Ghost Bulimulus	Bulimulus bonariensis		Mollusca	831286	Bulimulus bonariensis		Eupulmonata	Stylommatophora	Orthalicoidea
1106033	2011-05-12	2011-05-12		Buenos Aires	50445	nicoolejnik	Nicolas Olejnik	2014-12-01 18:06:32 UTC	2020-07-24 16:03:33 UTC	research	CC-BY-NC	http://www.inaturalist.org/observations/1106033	https://inaturalist-open-data.s3.amazonaws.com/photos/1390403/medium.JPG																														Mollusca	831286	Bulimulus bonariensis		Eupulmonata	Stylommatophora	Orthalicoidea
1772150	2009-02-06	2009-02-06		Buenos Aires	50445	nicoolejnik	Nicolas Olejnik	2015-07-17 13:41:02 UTC	2020-07-24 16:03:09 UTC	research	CC-BY-NC	http://www.inaturalist.org/observations/1772150	https://inaturalist-open-data.s3.amazonaws.com/photos/2143785/medium.JPG				0	0	false		Vuelta de Obligado, Buenos Aires	-33.598634	-59.808658	92				92			FALSE				San Pedro	Buenos Aires	Argentina	Buenos Aires	San Pedro	Ghost Bulimulus	Bulimulus bonariensis		Mollusca	831286	Bulimulus bonariensis		Eupulmonata	Stylommatophora	Orthalicoidea
1806328	2007-04-15	2007-04-15		Buenos Aires	50445	nicoolejnik	Nicolas Olejnik	2015-07-27 13:07:57 UTC	2020-07-24 16:02:45 UTC	research	CC-BY-NC	http://www.inaturalist.org/observations/1806328	https://inaturalist-open-data.s3.amazonaws.com/photos/2188941/medium.JPG				0	0	false		Reserva natural Otamendi	-34.229705	-58.895624	144				144			FALSE				Campana	Buenos Aires	Argentina	Buenos Aires	Campana	Ghost Bulimulus	Bulimulus bonariensis		Mollusca	831286	Bulimulus bonariensis		Eupulmonata	Stylommatophora	Orthalicoidea
19163907	2018/12/11 8:36 PM -03	2018-12-11		Buenos Aires	966066	silviolamothe		2018-12-23 01:43:43 UTC	2018-12-24 21:59:01 UTC	research	CC-BY-NC	https://www.inaturalist.org/observations/19163907	https://inaturalist-open-data.s3.amazonaws.com/photos/29427703/medium.jpeg				1	0	false		Gral Villegas, Buenos Aires, Argentina	-35.0101831132	-62.9980429565	488				488			FALSE				General Villegas	Buenos Aires	Argentina	Buenos Aires	General Villegas	Bulimulus bonariensis	Bulimulus bonariensis		Mollusca	831286	Bulimulus bonariensis		Eupulmonata	Stylommatophora	Orthalicoidea
19739178	2019-01-17 5:49:39 p. m. GMT-03:00	2019-01-17	2019-01-17 14:49:39 UTC	Baghdad	1412717	elmen	El Men	2019-01-19 22:28:26 UTC	2021-08-12 18:52:07 UTC	research		https://www.inaturalist.org/observations/19739178	https://static.inaturalist.org/photos/30489554/medium.jpg				2	0	false	2	Punilla, AR-CB, AR	-31.4932365417	-64.5718154907								FALSE	gps	gps		Punilla	Córdoba	Argentina	Córdoba	Punilla	Ghost Bulimulus	Bulimulus bonariensis		Mollusca	831286	Bulimulus bonariensis		Eupulmonata	Stylommatophora	Orthalicoidea
20283497	2018/10/20 12:44 PM -03	2018-10-20		Buenos Aires	472014	jjbonannod	Juan José Bonanno	2019-02-11 18:34:09 UTC	2021-08-12 18:52:08 UTC	research	CC-BY-NC	https://www.inaturalist.org/observations/20283497	https://inaturalist-open-data.s3.amazonaws.com/photos/31312919/medium.jpg				1	0	false		La Lucila, Buenos Aires, Argentina	-34.4918126	-58.4794414	194				194			FALSE				San Isidro	Buenos Aires	Argentina	Buenos Aires	San Isidro	Bulimulus bonariensis	Bulimulus bonariensis		Mollusca	831286	Bulimulus bonariensis		Eupulmonata	Stylommatophora	Orthalicoidea
21362688	2019/03/17 1:48 PM -03	2019-03-17		Buenos Aires	1234701	germangfeler	Germán González	2019-03-18 18:24:30 UTC	2019-03-18 19:58:27 UTC	research	CC-BY-NC	https://www.inaturalist.org/observations/21362688	https://inaturalist-open-data.s3.amazonaws.com/photos/33042362/medium.jpeg				1	0	false		Ciudad de Córdoba, Provincia de Córdoba, Argentina	-31.3562022663	-64.272959177	424				424			FALSE				Capital	Córdoba	Argentina	Córdoba	Capital	Bulimulus bonariensis	Bulimulus bonariensis		Mollusca	831286	Bulimulus bonariensis		Eupulmonata	Stylommatophora	Orthalicoidea
23646961	2019/04/26 7:57 PM -03	2019-04-26		Buenos Aires	966066	silviolamothe		2019-04-28 15:25:45 UTC	2019-04-29 01:07:20 UTC	research	CC-BY-NC	https://www.inaturalist.org/observations/23646961	https://inaturalist-open-data.s3.amazonaws.com/photos/36603638/medium.jpeg				1	0	false		Gral Villegas, Buenos Aires, Argentina	-35.0099019141	-62.998729602	488				488			FALSE				General Villegas	Buenos Aires	Argentina	Buenos Aires	General Villegas	Bulimulus bonariensis	Bulimulus bonariensis		Mollusca	831286	Bulimulus bonariensis		Eupulmonata	Stylommatophora	Orthalicoidea
24851046	2016-03-02 17:53:16	2016-03-02	2016-03-02 20:53:16 UTC	Buenos Aires	144	trekman	Gustavo Fernando Durán	2019-05-09 19:36:04 UTC	2019-05-09 19:49:56 UTC	research	CC-BY-NC-SA	https://www.inaturalist.org/observations/24851046	https://inaturalist-open-data.s3.amazonaws.com/photos/30312523/medium.jpg		Bulimulus bonariensis, Bulimulus, bonariensis, Caracol y Hormiga	Bulimulus es un género de pequeños y medianos moluscos gasterópodos pulmonados tropicales y subtropicales de la subfamilia Bulimulinae, dentro de la familia Bulimulidae.																											Mollusca	831286	Bulimulus bonariensis		Eupulmonata	Stylommatophora	Orthalicoidea
25112370	2019-05-14 12:35:16 p. m. GMT-03:00	2019-05-14	2019-05-14 15:35:16 UTC	Brasilia	1069540	patriciaanamargaritafranchino	PATRICIA ANA MARGARITA Franchino	2019-05-14 15:36:33 UTC	2021-08-12 18:52:15 UTC	research		https://www.inaturalist.org/observations/25112370	https://static.inaturalist.org/photos/38866604/medium.jpeg				2	0	false	2	Av. Aristóbulo del Valle 5960, S3004FSS Santa Fe, Argentina	-31.6132717	-60.6957335	23				23			FALSE				La Capital	Santa Fe	Argentina	Santa Fe	La Capital	Ghost Bulimulus	Bulimulus bonariensis		Mollusca	831286	Bulimulus bonariensis		Eupulmonata	Stylommatophora	Orthalicoidea
25850064	2014/03/29 10:00 AM -03	2014-03-29		Buenos Aires	472014	jjbonannod	Juan José Bonanno	2019-05-27 01:41:55 UTC	2019-10-15 15:57:15 UTC	research	CC-BY-NC	https://www.inaturalist.org/observations/25850064	https://inaturalist-open-data.s3.amazonaws.com/photos/40066446/medium.jpg				1	0	false		La Lucila, Buenos Aires, Argentina	-34.4911242093	-58.4801207976	179				179			FALSE				San Isidro	Buenos Aires	Argentina	Buenos Aires	San Isidro	Ghost Bulimulus	Bulimulus bonariensis		Mollusca	831286	Bulimulus bonariensis		Eupulmonata	Stylommatophora	Orthalicoidea
26114672	2018/11/12 10:49 AM -03	2018-11-12		Buenos Aires	382941	lrubio7	Lucas Rubio	2019-05-31 14:16:07 UTC	2023-08-19 11:13:44 UTC	research	CC-BY	https://www.inaturalist.org/observations/26114672	https://inaturalist-open-data.s3.amazonaws.com/photos/40519487/medium.jpg				1	0	false		Dique Luján, Buenos Aires, Argentina	-34.3717288	-58.6880906	4296				4296			FALSE				Tigre	Buenos Aires	Argentina	Buenos Aires	Tigre	Ghost Bulimulus	Bulimulus bonariensis		Mollusca	831286	Bulimulus bonariensis		Eupulmonata	Stylommatophora	Orthalicoidea
28328723	2019/03/16 11:15 AM -03	2019-03-16		Buenos Aires	1509502	diego_t	Diego Trillo	2019-07-06 23:41:12 UTC	2019-07-07 21:17:44 UTC	research	CC-BY-NC	https://www.inaturalist.org/observations/28328723	https://inaturalist-open-data.s3.amazonaws.com/photos/44148995/medium.jpeg				1	0	false		Dock Sud, Provincia de Buenos Aires, Argentina	-34.6633388552	-58.3145581978	631				631			FALSE				Avellaneda	Buenos Aires	Argentina	Buenos Aires	Avellaneda	Bulimulus bonariensis	Bulimulus bonariensis		Mollusca	831286	Bulimulus bonariensis		Eupulmonata	Stylommatophora	Orthalicoidea
28332036	2019/04/13 10:06 AM -03	2019-04-13		Buenos Aires	1509502	diego_t	Diego Trillo	2019-07-07 00:31:58 UTC	2019-10-15 15:57:12 UTC	research	CC-BY-NC	https://www.inaturalist.org/observations/28332036	https://inaturalist-open-data.s3.amazonaws.com/photos/44155583/medium.jpeg				1	0	false		Dock Sud, Provincia de Buenos Aires, Argentina	-34.6633388552	-58.3145581978	631				631			FALSE				Avellaneda	Buenos Aires	Argentina	Buenos Aires	Avellaneda	Ghost Bulimulus	Bulimulus bonariensis		Mollusca	831286	Bulimulus bonariensis		Eupulmonata	Stylommatophora	Orthalicoidea
28384219	2016/03/12 10:52 AM -03	2016-03-12		Buenos Aires	1383117	rguller	Roberto Guller	2019-07-07 19:25:40 UTC	2019-07-08 14:50:10 UTC	research	CC-BY-NC	https://www.inaturalist.org/observations/28384219	https://inaturalist-open-data.s3.amazonaws.com/photos/44242491/medium.jpg				2	0	false		Agronomía, CABA, Argentina	-34.593029125	-58.4828984672	61				61			FALSE				Distrito Federal	Ciudad de Buenos Aires	Argentina	Ciudad de Buenos Aires	Distrito Federal	Ghost Bulimulus	Bulimulus bonariensis		Mollusca	831286	Bulimulus bonariensis		Eupulmonata	Stylommatophora	Orthalicoidea
32362296	2019/06/30 7:34 PM UTC	2019-06-30		UTC	2197647	nstor8	Néstor Trossero	2019-09-08 19:35:59 UTC	2019-10-15 15:57:10 UTC	research	CC0	https://www.inaturalist.org/observations/32362296	https://static.inaturalist.org/photos/50749402/medium.jpg				1	0	false		Paraná, Entre Ríos, Argentina	-31.7580317985	-60.4913479284	61				61			FALSE				Paraná	Entre Ríos	Argentina	Entre Ríos	Paraná	Ghost Bulimulus	Bulimulus bonariensis		Mollusca	831286	Bulimulus bonariensis		Eupulmonata	Stylommatophora	Orthalicoidea
36803736	2019-12-20 3:28:52 PM GMT-03:00	2019-12-20	2019-12-20 18:28:52 UTC	Buenos Aires	736966	jbar82	José Luis Barberán	2019-12-20 18:32:04 UTC	2021-08-12 18:52:38 UTC	research	CC-BY-NC-SA	https://www.inaturalist.org/observations/36803736	https://inaturalist-open-data.s3.amazonaws.com/photos/58237915/medium.jpeg				2	0	false	2	Marcos Juárez, AR-CB, AR	-32.7612592331	-62.0735770966					29066	obscured		TRUE	gps	gps		Marcos Juárez	Córdoba	Argentina	Córdoba	Marcos Juárez	Bulimulus bonariensis	Bulimulus bonariensis		Mollusca	831286	Bulimulus bonariensis		Eupulmonata	Stylommatophora	Orthalicoidea
36828564	2019/12/21 10:34 AM -0300	2019-12-21	2019-12-21 13:34:00 UTC	Buenos Aires	1205836	elbeltrocco	Eduardo Luis Beltrocco	2019-12-21 18:02:10 UTC	2021-08-12 18:52:39 UTC	research	CC-BY-NC	https://www.inaturalist.org/observations/36828564	https://inaturalist-open-data.s3.amazonaws.com/photos/58280543/medium.jpg				1	0	false		Sarmiento y Centenario, Santo Tome, Santa Fe	-31.6616575276	-60.7608092327	18				18			FALSE				La Capital	Santa Fe	Argentina	Santa Fe	La Capital	Bulimulus bonariensis	Bulimulus bonariensis		Mollusca	831286	Bulimulus bonariensis		Eupulmonata	Stylommatophora	Orthalicoidea
37062892	2019-12-29 10:05:57 AM GMT-03:00	2019-12-29	2019-12-29 13:05:57 UTC	Brasilia	2504198	fernandoarchuby	Fernando Archuby	2019-12-29 13:45:16 UTC	2020-01-06 21:59:58 UTC	research	CC-BY-SA	https://www.inaturalist.org/observations/37062892	https://inaturalist-open-data.s3.amazonaws.com/photos/58757017/medium.jpeg				1	0	false	2	Ruta 21 Y Garita Arroyo del Medio, Santa Fe, Argentina	-33.2863883972	-60.2730560303								FALSE	gps	gps		Constitución	Santa Fe	Argentina	Santa Fe	Constitución	Ghost Bulimulus	Bulimulus bonariensis		Mollusca	831286	Bulimulus bonariensis		Eupulmonata	Stylommatophora	Orthalicoidea
37275883	2020-01-04 12:11:14 PM GMT-03:00	2020-01-04	2020-01-04 15:11:14 UTC	Brasilia	2481121	bahianoayala	Bahiano Ayala	2020-01-04 20:13:18 UTC	2023-07-07 17:16:39 UTC	research	CC-BY	https://www.inaturalist.org/observations/37275883	https://inaturalist-open-data.s3.amazonaws.com/photos/59064394/medium.jpeg				2	0	false	2	Longchamps, Buenos Aires, Argentina	-34.8658335483	-58.4079233184	3				3			FALSE	gps	gps		Almirante Brown	Buenos Aires	Argentina	Buenos Aires	Almirante Brown	Ghost Bulimulus	Bulimulus bonariensis		Mollusca	831286	Bulimulus bonariensis		Eupulmonata	Stylommatophora	Orthalicoidea
37276794	2019/05/12 3:36 PM -0300	2019-05-12	2019-05-12 18:36:00 UTC	Buenos Aires	1454648	r-a-p	RAP	2020-01-04 20:36:21 UTC	2021-09-14 21:36:08 UTC	research	CC-BY-NC	https://www.inaturalist.org/observations/37276794	https://static.inaturalist.org/photos/59065769/medium.jpg				1	0	false		La Lucila, Buenos Aires, Argentina	-34.4918126	-58.4794414	194				194			FALSE				San Isidro	Buenos Aires	Argentina	Buenos Aires	San Isidro	Bulimulus bonariensis	Bulimulus bonariensis		Mollusca	831286	Bulimulus bonariensis		Eupulmonata	Stylommatophora	Orthalicoidea
37376095	2019/12/29 7:01 AM HST	2019-12-29	2019-12-29 17:01:00 UTC	Hawaii	854602	juanmago	Juan Matías	2020-01-07 18:39:51 UTC	2020-01-09 14:53:12 UTC	research	CC-BY-NC	https://www.inaturalist.org/observations/37376095	https://inaturalist-open-data.s3.amazonaws.com/photos/59240647/medium.jpeg				2	0	false		Bragado, Buenos Aires, Argentina	-34.8888180358	-60.5964577915	2676				2676			FALSE				Bragado	Buenos Aires	Argentina	Buenos Aires	Bragado	Bulimulus bonariensis	Bulimulus bonariensis		Mollusca	831286	Bulimulus bonariensis		Eupulmonata	Stylommatophora	Orthalicoidea
37575499	2019/12/03 10:52 AM -0300	2019-12-03	2019-12-03 13:52:00 UTC	Buenos Aires	110716	adrianbraidotti	Adrian Braidotti	2020-01-14 02:47:40 UTC	2020-01-14 09:32:14 UTC	research	CC-BY-NC	https://www.inaturalist.org/observations/37575499	https://inaturalist-open-data.s3.amazonaws.com/photos/59593437/medium.jpeg				1	0	false		Carcarañá Santa Fe Argentina	-32.853832672	-61.1566867366	122				122			FALSE				San Lorenzo	Santa Fe	Argentina	Santa Fe	San Lorenzo	Ghost Bulimulus	Bulimulus bonariensis		Mollusca	831286	Bulimulus bonariensis		Eupulmonata	Stylommatophora	Orthalicoidea
37627590	2020/01/14 9:38 PM UTC	2020-01-14		UTC	2197647	nstor8	Néstor Trossero	2020-01-15 21:41:59 UTC	2021-08-12 18:52:42 UTC	research	CC0	https://www.inaturalist.org/observations/37627590	https://static.inaturalist.org/photos/59685672/medium.jpg				2	0	false		Paraná, Entre Ríos, Argentina	-31.7521903222	-60.4933075461	122				122			FALSE				Paraná	Entre Ríos	Argentina	Entre Ríos	Paraná	Bulimulus bonariensis	Bulimulus bonariensis		Mollusca	831286	Bulimulus bonariensis		Eupulmonata	Stylommatophora	Orthalicoidea
37844450	2020-01-17 4:09:01 PM GMT-03:00	2020-01-17	2020-01-17 19:09:01 UTC	Brasilia	2479819	el-naturalista	El Naturalista	2020-01-22 14:07:04 UTC	2021-11-26 21:44:13 UTC	research	CC-BY-NC	https://www.inaturalist.org/observations/37844450	https://inaturalist-open-data.s3.amazonaws.com/photos/60073809/medium.jpeg			Hallados varios especímenes en la zona urbana de Rufino, al sur de Santa Fe.	2	0	false	2	Rufino	-34.2632375953	-62.7128278837	5577				5577			FALSE	gps	gps		General López	Santa Fe	Argentina	Santa Fe	General López	Ghost Bulimulus	Bulimulus bonariensis		Mollusca	831286	Bulimulus bonariensis		Eupulmonata	Stylommatophora	Orthalicoidea
38298291	2020/01/22 6:58 PM -0300	2020-01-22	2020-01-22 21:58:00 UTC	Buenos Aires	1205836	elbeltrocco	Eduardo Luis Beltrocco	2020-02-04 16:58:51 UTC	2021-08-12 18:52:52 UTC	research	CC-BY-NC	https://www.inaturalist.org/observations/38298291	https://inaturalist-open-data.s3.amazonaws.com/photos/60846801/medium.jpg				1	0	false		Sarmiento y Centenario, Santo Tome, Santa Fe	-31.6616575276	-60.7608092327	18				18			FALSE				La Capital	Santa Fe	Argentina	Santa Fe	La Capital	Ghost Bulimulus	Bulimulus bonariensis		Mollusca	831286	Bulimulus bonariensis		Eupulmonata	Stylommatophora	Orthalicoidea
38916736	2020/01/23 12:07 PM -0300	2020-01-23	2020-01-23 15:07:00 UTC	Buenos Aires	1454648	r-a-p	RAP	2020-02-20 19:29:59 UTC	2021-09-14 21:36:08 UTC	research	CC-BY-NC	https://www.inaturalist.org/observations/38916736	https://static.inaturalist.org/photos/61848085/medium.jpg				1	0	false		Puerto Madero, CABA, Argentina	-34.6080626338	-58.3509635925	244				244			FALSE				Distrito Federal	Ciudad de Buenos Aires	Argentina	Ciudad de Buenos Aires	Distrito Federal	Ghost Bulimulus	Bulimulus bonariensis		Mollusca	831286	Bulimulus bonariensis		Eupulmonata	Stylommatophora	Orthalicoidea
39062384	2020-02-22 7:12:17 PM GMT-03:00	2020-02-22	2020-02-22 22:12:17 UTC	Brasilia	2480992	francogoodman	Franco Goodman	2020-02-22 22:26:40 UTC	2021-08-12 18:52:59 UTC	research	CC-BY-NC	https://www.inaturalist.org/observations/39062384	https://inaturalist-open-data.s3.amazonaws.com/photos/61981284/medium.jpeg				1	0	false	2	Rosario, AR-SF, AR	-32.9498544863	-60.7016143575	9				9			FALSE	gps	gps		Rosario	Santa Fe	Argentina	Santa Fe	Rosario	Bulimulus bonariensis	Bulimulus bonariensis		Mollusca	831286	Bulimulus bonariensis		Eupulmonata	Stylommatophora	Orthalicoidea
39382182	2019/12/25 8:52 PM -0300	2019-12-25	2019-12-25 23:52:00 UTC	Buenos Aires	966066	silviolamothe		2020-03-01 01:47:57 UTC	2021-08-12 18:53:05 UTC	research	CC-BY-NC	https://www.inaturalist.org/observations/39382182	https://inaturalist-open-data.s3.amazonaws.com/photos/62470607/medium.jpeg				1	0	false		Gral Villegas, Buenos Aires, Argentina	-35.0539680572	-63.0560645019	488				488			FALSE				General Villegas	Buenos Aires	Argentina	Buenos Aires	General Villegas	Bulimulus bonariensis	Bulimulus bonariensis		Mollusca	831286	Bulimulus bonariensis		Eupulmonata	Stylommatophora	Orthalicoidea
40214751	2020/03/15 12:38 PM -0300	2020-03-15	2020-03-15 15:38:00 UTC	Buenos Aires	2569258	verogelem	Verónica André	2020-03-19 01:42:52 UTC	2020-04-01 23:30:26 UTC	research	CC-BY-NC	https://www.inaturalist.org/observations/40214751	https://inaturalist-open-data.s3.amazonaws.com/photos/63881618/medium.jpeg			en el agua.	2	0	false		Gral. Villegas, Buenos Aires, Argentina	-35.040089151	-63.0293471157	757				757			FALSE				General Villegas	Buenos Aires	Argentina	Buenos Aires	General Villegas	Ghost Bulimulus	Bulimulus bonariensis		Mollusca	831286	Bulimulus bonariensis		Eupulmonata	Stylommatophora	Orthalicoidea
40894219	2020/03/27 11:09 PM -0300	2020-03-27	2020-03-28 02:09:00 UTC	Buenos Aires	1111470	leoleiva	Leonardo Adrián LEIVA	2020-03-28 17:01:50 UTC	2020-03-28 18:50:21 UTC	research	CC-BY-NC	https://www.inaturalist.org/observations/40894219	https://inaturalist-open-data.s3.amazonaws.com/photos/64833417/medium.jpeg				2	0	false		Colón 2130, Santo Tome (Dpto. La Capital), Santa Fe, Argentina	-31.6681287711	-60.7643775721	4				4			FALSE				La Capital	Santa Fe	Argentina	Santa Fe	La Capital	Ghost Bulimulus	Bulimulus bonariensis		Mollusca	831286	Bulimulus bonariensis		Eupulmonata	Stylommatophora	Orthalicoidea
41405774	2020/04/04 11:50 PM UTC	2020-04-04		UTC	2197647	nstor8	Néstor Trossero	2020-04-04 23:51:57 UTC	2020-04-05 14:41:51 UTC	research	CC0	https://www.inaturalist.org/observations/41405774	https://static.inaturalist.org/photos/65681410/medium.jpg				1	0	false		Paraná, Entre Ríos, Argentina	-31.7523341299	-60.4931910769	61				61			FALSE				Paraná	Entre Ríos	Argentina	Entre Ríos	Paraná	Ghost Bulimulus	Bulimulus bonariensis		Mollusca	831286	Bulimulus bonariensis		Eupulmonata	Stylommatophora	Orthalicoidea
41550216	2016/06/01 4:29 PM -0300	2016-06-01	2016-06-01 19:29:00 UTC	Buenos Aires	2569170	demianlescano		2020-04-06 19:32:31 UTC	2020-04-14 19:56:37 UTC	research	CC-BY-NC	https://www.inaturalist.org/observations/41550216	https://inaturalist-open-data.s3.amazonaws.com/photos/65922409/medium.jpeg				1	0	false		Roque Sáenz Peña, Rosario, Santa Fe, Argentina	-33.0079855796	-60.6210766571	114				114			FALSE				Rosario	Santa Fe	Argentina	Santa Fe	Rosario	Ghost Bulimulus	Bulimulus bonariensis		Mollusca	831286	Bulimulus bonariensis		Eupulmonata	Stylommatophora	Orthalicoidea
42187907	2020/01/12 12:07 PM -0300	2020-01-12	2020-01-12 15:07:00 UTC	Buenos Aires	1454648	r-a-p	RAP	2020-04-14 20:31:49 UTC	2021-09-14 21:36:08 UTC	research	CC-BY-NC	https://www.inaturalist.org/observations/42187907	https://static.inaturalist.org/photos/66971145/medium.jpg				1	0	false		Acassuso, Buenos Aires, Argentina	-34.4700166985	-58.4962320328	61				61			FALSE				San Isidro	Buenos Aires	Argentina	Buenos Aires	San Isidro	Ghost Bulimulus	Bulimulus bonariensis		Mollusca	831286	Bulimulus bonariensis		Eupulmonata	Stylommatophora	Orthalicoidea
43306773	2020-04-25 9:35:04 AM GMT-03:00	2020-04-25	2020-04-25 12:35:04 UTC	Buenos Aires	1233171	gastma	Gaston Martinez	2020-04-25 12:41:35 UTC	2022-01-17 13:53:38 UTC	research	CC-BY-NC	https://www.inaturalist.org/observations/43306773	https://inaturalist-open-data.s3.amazonaws.com/photos/68734559/medium.jpeg				2	0	false	2	Recreo, Santa Fe, Argentina	-31.4937600817	-60.7356891409	6				6			FALSE	gps	gps		La Capital	Santa Fe	Argentina	Santa Fe	La Capital	Bulimulus bonariensis	Bulimulus bonariensis		Mollusca	831286	Bulimulus bonariensis		Eupulmonata	Stylommatophora	Orthalicoidea
43500892	2014/10/13 11:16 AM -0300	2014-10-13	2014-10-13 14:16:00 UTC	Buenos Aires	733101	pablohcapovilla	Pablo H Capovilla	2020-04-26 00:35:49 UTC	2024-01-04 03:03:33 UTC	research	CC-BY	https://www.inaturalist.org/observations/43500892	https://inaturalist-open-data.s3.amazonaws.com/photos/69000961/medium.jpeg				1	0	false		Departamento Las Colonias, Santa Fe, Argentina	-31.3837785061	-60.9139072848	15				15			FALSE				Las Colonias	Santa Fe	Argentina	Santa Fe	Las Colonias	Ghost Bulimulus	Bulimulus bonariensis		Mollusca	831286	Bulimulus bonariensis		Eupulmonata	Stylommatophora	Orthalicoidea
43727457	2019/04/13 5:02 PM -0300	2019-04-13	2019-04-13 20:02:00 UTC	Buenos Aires	1454648	r-a-p	RAP	2020-04-26 20:53:32 UTC	2021-09-14 21:36:08 UTC	research	CC-BY-NC	https://www.inaturalist.org/observations/43727457	https://static.inaturalist.org/photos/69353001/medium.jpg				1	0	false		Acassuso, Buenos Aires, Argentina	-34.4700166985	-58.4962320328	61				61			FALSE				San Isidro	Buenos Aires	Argentina	Buenos Aires	San Isidro	Ghost Bulimulus	Bulimulus bonariensis		Mollusca	831286	Bulimulus bonariensis		Eupulmonata	Stylommatophora	Orthalicoidea
43764895	2020/04/26 4:29 PM -0300	2020-04-26	2020-04-26 19:29:00 UTC	Buenos Aires	1111470	leoleiva	Leonardo Adrián LEIVA	2020-04-26 23:05:14 UTC	2020-04-28 16:11:32 UTC	research	CC-BY-NC	https://www.inaturalist.org/observations/43764895	https://inaturalist-open-data.s3.amazonaws.com/photos/69410089/medium.jpeg				2	0	false		Colón 2130, Santo Tome (Dpto. La Capital), Santa Fe, Argentina	-31.6681287711	-60.7643775721	4				4			FALSE				La Capital	Santa Fe	Argentina	Santa Fe	La Capital	Bulimulus bonariensis	Bulimulus bonariensis		Mollusca	831286	Bulimulus bonariensis		Eupulmonata	Stylommatophora	Orthalicoidea
43875410	2020/04/26 9:52 PM -0300	2020-04-26	2020-04-27 00:52:00 UTC	Buenos Aires	1111470	leoleiva	Leonardo Adrián LEIVA	2020-04-27 12:21:37 UTC	2020-04-27 13:06:50 UTC	research	CC-BY-NC	https://www.inaturalist.org/observations/43875410	https://inaturalist-open-data.s3.amazonaws.com/photos/69581040/medium.jpeg				2	0	false		Colón 2130, Santo Tome (Dpto. La Capital), Santa Fe, Argentina	-31.6681287711	-60.7643775721	4				4			FALSE				La Capital	Santa Fe	Argentina	Santa Fe	La Capital	Bulimulus bonariensis	Bulimulus bonariensis		Mollusca	831286	Bulimulus bonariensis		Eupulmonata	Stylommatophora	Orthalicoidea
43891597	2020-04-26 1:10:00 PM GMT-03:00	2020-04-26	2020-04-26 16:10:00 UTC	Brasilia	2854235	flor67	Flor Juncos	2020-04-27 14:08:09 UTC	2020-04-30 22:31:17 UTC	research		https://www.inaturalist.org/observations/43891597	https://static.inaturalist.org/photos/69605932/medium.jpg			Caracol	1	0	false	2	Costa Sacate	-31.6492746897	-63.7614234164	1395				1395			FALSE	gps	gps		Rió Segundo	Córdoba	Argentina	Córdoba	Rió Segundo	Ghost Bulimulus	Bulimulus bonariensis		Mollusca	831286	Bulimulus bonariensis		Eupulmonata	Stylommatophora	Orthalicoidea
44008033	2020/04/25 12:43 PM -0300	2020-04-25	2020-04-25 15:43:00 UTC	Buenos Aires	966066	silviolamothe		2020-04-27 22:27:30 UTC	2020-04-29 15:42:56 UTC	research	CC-BY-NC	https://www.inaturalist.org/observations/44008033	https://inaturalist-open-data.s3.amazonaws.com/photos/69780946/medium.jpeg				1	0	false		Gral Villegas, Buenos Aires, Argentina	-35.0514385867	-63.0491980469	488				488			FALSE				General Villegas	Buenos Aires	Argentina	Buenos Aires	General Villegas	Ghost Bulimulus	Bulimulus bonariensis		Mollusca	831286	Bulimulus bonariensis		Eupulmonata	Stylommatophora	Orthalicoidea
44196207	2020/04/26 6:00 PM -0300	2020-04-26	2020-04-26 21:00:00 UTC	Buenos Aires	1205836	elbeltrocco	Eduardo Luis Beltrocco	2020-04-28 23:56:15 UTC	2020-04-29 17:19:35 UTC	research	CC-BY-NC	https://www.inaturalist.org/observations/44196207	https://inaturalist-open-data.s3.amazonaws.com/photos/70068195/medium.jpg				1	0	false		Sarmiento y Centenario, Santo Tome, Santa Fe	-31.6616575276	-60.7608092327	18				18			FALSE				La Capital	Santa Fe	Argentina	Santa Fe	La Capital	Ghost Bulimulus	Bulimulus bonariensis		Mollusca	831286	Bulimulus bonariensis		Eupulmonata	Stylommatophora	Orthalicoidea
47633746	2020/05/27 11:23 AM	2020-05-27	2020-05-27 21:23:00 UTC	Hawaii	2458572	churrinchee	Flor Mottola	2020-05-28 16:18:33 UTC	2020-05-29 22:09:18 UTC	research		https://www.inaturalist.org/observations/47633746	https://static.inaturalist.org/photos/75549012/medium.jpeg				1	0	false		Estancia Benquerencia, Buenos Aires, Argentina	-35.5547941	-58.6218396	4095				4095			FALSE				Monte	Buenos Aires	Argentina	Buenos Aires	Monte	Bulimulus bonariensis	Bulimulus bonariensis		Mollusca	831286	Bulimulus bonariensis		Eupulmonata	Stylommatophora	Orthalicoidea
47934861	2020/05/19 5:00 PM -0300	2020-05-19	2020-05-19 20:00:00 UTC	Buenos Aires	2966277	juanagg	Juana Garcia Gonzalez	2020-05-31 02:49:34 UTC	2020-08-19 01:35:22 UTC	research	CC-BY-NC	https://www.inaturalist.org/observations/47934861	https://inaturalist-open-data.s3.amazonaws.com/photos/76037977/medium.png				3	0	false		Soldini, Santa Fe, Argentina	-33.0174173029	-60.7493097458	1				1			FALSE			Soldini	Rosario	Santa Fe	Argentina	Santa Fe	Rosario	Bulimulus bonariensis	Bulimulus bonariensis		Mollusca	831286	Bulimulus bonariensis		Eupulmonata	Stylommatophora	Orthalicoidea
48124517	2019/04/18 11:49 AM -0300	2019-04-18	2019-04-18 14:49:00 UTC	Buenos Aires	1454648	r-a-p	RAP	2020-06-01 14:54:15 UTC	2021-09-14 21:36:08 UTC	research	CC-BY-NC	https://www.inaturalist.org/observations/48124517	https://static.inaturalist.org/photos/76343322/medium.jpg				3	0	false		Acassuso, Buenos Aires, Argentina	-34.4700166985	-58.4962320328	61				61			FALSE				San Isidro	Buenos Aires	Argentina	Buenos Aires	San Isidro	Bulimulus bonariensis	Bulimulus bonariensis		Mollusca	831286	Bulimulus bonariensis		Eupulmonata	Stylommatophora	Orthalicoidea
49358526	2020/01/12 5:20 PM -0300	2020-01-12	2020-01-12 20:20:00 UTC	Buenos Aires	1454648	r-a-p	RAP	2020-06-12 19:11:03 UTC	2021-09-14 21:36:08 UTC	research	CC-BY-NC	https://www.inaturalist.org/observations/49358526	https://static.inaturalist.org/photos/78352898/medium.jpg				1	0	false		Acassuso, Buenos Aires, Argentina	-34.4700166985	-58.4962320328	61				61			FALSE				San Isidro	Buenos Aires	Argentina	Buenos Aires	San Isidro	Ghost Bulimulus	Bulimulus bonariensis		Mollusca	831286	Bulimulus bonariensis		Eupulmonata	Stylommatophora	Orthalicoidea
50474757	2020/06/11 1:02 PM -0300	2020-06-11	2020-06-11 16:02:00 UTC	Buenos Aires	2569258	verogelem	Verónica André	2020-06-21 21:34:36 UTC	2020-06-26 19:27:39 UTC	research	CC-BY-NC	https://www.inaturalist.org/observations/50474757	https://inaturalist-open-data.s3.amazonaws.com/photos/80144147/medium.jpeg				2	0	false		Gral. Villegas, Provincia de Buenos Aires, Argentina	-35.0141885885	-63.0100348434	671				671			FALSE				General Villegas	Buenos Aires	Argentina	Buenos Aires	General Villegas	Ghost Bulimulus	Bulimulus bonariensis		Mollusca	831286	Bulimulus bonariensis		Eupulmonata	Stylommatophora	Orthalicoidea
51578410	2019/11/19 03:49 PM	2019-11-19	2019-11-19 18:49:00 UTC	Buenos Aires	1447711	robertgodoy	Roberto Godoy	2020-07-01 13:48:14 UTC	2023-07-07 21:22:17 UTC	research		https://www.inaturalist.org/observations/51578410	https://inaturalist-open-data.s3.amazonaws.com/photos/81957834/medium.jpg				2	0	false		Rosario del Tala, Entre Ríos, Argentina	-32.3112890652	-59.1452656289	20				20			FALSE				Tala	Entre Ríos	Argentina	Entre Ríos	Tala	Bulimulus bonariensis	Bulimulus bonariensis		Mollusca	831286	Bulimulus bonariensis		Eupulmonata	Stylommatophora	Orthalicoidea
52399550	2019/02/07 4:27 PM -0300	2019-02-07	2019-02-07 19:27:00 UTC	Buenos Aires	1454648	r-a-p	RAP	2020-07-08 19:42:55 UTC	2021-09-14 21:36:08 UTC	research	CC-BY-NC	https://www.inaturalist.org/observations/52399550	https://static.inaturalist.org/photos/83294975/medium.jpg				1	0	false		Acassuso, Buenos Aires, Argentina	-34.4700166985	-58.4962320328	61				61			FALSE				San Isidro	Buenos Aires	Argentina	Buenos Aires	San Isidro	Ghost Bulimulus	Bulimulus bonariensis		Mollusca	831286	Bulimulus bonariensis		Eupulmonata	Stylommatophora	Orthalicoidea
53089309	2017/06/13	2017-06-13		Pacific Time (US & Canada)	1772002	thomaseverest	Thomas Everest	2020-07-14 20:39:07 UTC	2021-08-02 00:07:08 UTC	research	CC-BY-NC	https://www.inaturalist.org/observations/53089309	https://inaturalist-open-data.s3.amazonaws.com/photos/84300016/medium.jpg			Under bushes, note the carinated/deformed specimen	1	0	false		Los Lapachos 584, Puerto Iguazú, Misiones, Argentina	-25.607786	-54.569204								FALSE				Iguazú	Misiones	Argentina	Misiones	Iguazú	Ghost Bulimulus	Bulimulus bonariensis		Mollusca	831286	Bulimulus bonariensis		Eupulmonata	Stylommatophora	Orthalicoidea
53384151	2011/11/11 6:57 PM -0300	2011-11-11	2011-11-11 21:57:00 UTC	Buenos Aires	50445	nicoolejnik	Nicolas Olejnik	2020-07-17 17:32:53 UTC	2020-07-24 16:01:31 UTC	research	CC-BY-NC	https://www.inaturalist.org/observations/53384151	https://inaturalist-open-data.s3.amazonaws.com/photos/84904341/medium.jpg				1	0	false		Pilar, Provincia de Buenos Aires, Argentina	-34.4120112359	-58.919321972	46				46			FALSE				Pilar	Buenos Aires	Argentina	Buenos Aires	Pilar	Ghost Bulimulus	Bulimulus bonariensis		Mollusca	831286	Bulimulus bonariensis		Eupulmonata	Stylommatophora	Orthalicoidea
53384152	2011/11/21 3:06 PM -0300	2011-11-21	2011-11-21 18:06:00 UTC	Buenos Aires	50445	nicoolejnik	Nicolas Olejnik	2020-07-17 17:32:53 UTC	2020-07-24 16:01:20 UTC	research	CC-BY-NC	https://www.inaturalist.org/observations/53384152	https://inaturalist-open-data.s3.amazonaws.com/photos/84904579/medium.jpg				1	0	false		Pilar, Provincia de Buenos Aires, Argentina	-34.4116609554	-58.9191771327	24				24			FALSE				Pilar	Buenos Aires	Argentina	Buenos Aires	Pilar	Ghost Bulimulus	Bulimulus bonariensis		Mollusca	831286	Bulimulus bonariensis		Eupulmonata	Stylommatophora	Orthalicoidea
53384160	2012/08/27 11:21 AM -0300	2012-08-27	2012-08-27 14:21:00 UTC	Buenos Aires	50445	nicoolejnik	Nicolas Olejnik	2020-07-17 17:32:58 UTC	2020-07-24 17:08:18 UTC	research	CC-BY-NC	https://www.inaturalist.org/observations/53384160	https://inaturalist-open-data.s3.amazonaws.com/photos/84904612/medium.jpg				2	0	false		Pilar, Provincia de Buenos Aires, Argentina	-34.4115975108	-58.9188874542	15				15			FALSE				Pilar	Buenos Aires	Argentina	Buenos Aires	Pilar	Ghost Bulimulus	Bulimulus bonariensis		Mollusca	831286	Bulimulus bonariensis		Eupulmonata	Stylommatophora	Orthalicoidea
53384359	2008/01/31 2:53 PM -0200	2008-01-31	2008-01-31 16:53:00 UTC	Mid-Atlantic	50445	nicoolejnik	Nicolas Olejnik	2020-07-17 17:34:28 UTC	2020-07-24 16:00:44 UTC	research	CC-BY-NC	https://www.inaturalist.org/observations/53384359	https://inaturalist-open-data.s3.amazonaws.com/photos/84904963/medium.jpeg				1	0	false		Partido de San Pedro, Provincia de Buenos Aires, Argentina	-33.5983050326	-59.8081450567	44				44			FALSE				San Pedro	Buenos Aires	Argentina	Buenos Aires	San Pedro	Ghost Bulimulus	Bulimulus bonariensis		Mollusca	831286	Bulimulus bonariensis		Eupulmonata	Stylommatophora	Orthalicoidea
53679732	2020/07/19 4:41 PM -0300	2020-07-19	2020-07-19 19:41:00 UTC	Buenos Aires	1111470	leoleiva	Leonardo Adrián LEIVA	2020-07-20 01:29:52 UTC	2020-08-02 04:10:14 UTC	research	CC-BY-NC	https://www.inaturalist.org/observations/53679732	https://inaturalist-open-data.s3.amazonaws.com/photos/85387177/medium.jpg				1	0	false		La Capital, Santa Fe, Argentina	-31.7284115196	-60.9128015956	4				4			FALSE				La Capital	Santa Fe	Argentina	Santa Fe	La Capital	Ghost Bulimulus	Bulimulus bonariensis		Mollusca	831286	Bulimulus bonariensis		Eupulmonata	Stylommatophora	Orthalicoidea
53955925	2020/07/19 4:18 PM -0300	2020-07-19	2020-07-19 19:18:00 UTC	Buenos Aires	2926769	patriciabierig	Patricia L. Bierig	2020-07-22 15:22:52 UTC	2021-01-18 05:24:30 UTC	research	CC-BY-NC	https://www.inaturalist.org/observations/53955925	https://inaturalist-open-data.s3.amazonaws.com/photos/85824867/medium.jpg			Muchos ejemplares bajo el bosque exótico.	4	0	false		La Capital, Santa Fe, Argentina	-31.728375632	-60.9127952822	17				17			FALSE				La Capital	Santa Fe	Argentina	Santa Fe	La Capital	Bulimulus bonariensis	Bulimulus bonariensis		Mollusca	831286	Bulimulus bonariensis		Eupulmonata	Stylommatophora	Orthalicoidea
54519789	2019/03/03 12:26 PM UTC	2019-03-03	2019-03-03 12:26:00 UTC	UTC	1064018	yako	Joaquin Valentinuzzi	2020-07-27 13:57:09 UTC	2020-07-29 15:15:30 UTC	research	CC-BY	https://www.inaturalist.org/observations/54519789	https://inaturalist-open-data.s3.amazonaws.com/photos/86753280/medium.jpeg				2	0	false		Camino de la Ribera Norte 480, B1641 Acassuso, Provincia de Buenos Aires, Argentina	-34.4700314	-58.4962151	187				187			FALSE				San Isidro	Buenos Aires	Argentina	Buenos Aires	San Isidro	Ghost Bulimulus	Bulimulus bonariensis		Mollusca	831286	Bulimulus bonariensis		Eupulmonata	Stylommatophora	Orthalicoidea
55552443	2020/08/05 12:41 AM UTC	2020-08-05	2020-08-05 00:41:00 UTC	UTC	2197647	nstor8	Néstor Trossero	2020-08-06 00:42:18 UTC	2020-08-07 02:28:39 UTC	research	CC0	https://www.inaturalist.org/observations/55552443	https://static.inaturalist.org/photos/88465439/medium.jpg				1	0	false		Paraná, Entre Ríos, Argentina	-31.7523492419	-60.4931699027	61				61			FALSE				Paraná	Entre Ríos	Argentina	Entre Ríos	Paraná	Ghost Bulimulus	Bulimulus bonariensis		Mollusca	831286	Bulimulus bonariensis		Eupulmonata	Stylommatophora	Orthalicoidea
58592195	2010/11/10 12:01 AM -0300	2010-11-10	2010-11-10 03:01:00 UTC	Buenos Aires	893121	martin_arregui	Martin Arregui	2020-09-05 12:31:23 UTC	2021-03-09 00:32:04 UTC	research	CC-BY-NC	https://www.inaturalist.org/observations/58592195	https://inaturalist-open-data.s3.amazonaws.com/photos/93556737/medium.jpg				1	0	false		Magdalena, Provincia de Buenos Aires, Argentina	-35.0171047822	-57.53263492	328				328			FALSE				Magdalena	Buenos Aires	Argentina	Buenos Aires	Magdalena	Ghost Bulimulus	Bulimulus bonariensis		Mollusca	831286	Bulimulus bonariensis		Eupulmonata	Stylommatophora	Orthalicoidea
60714931	2020/09/25 10:48 AM -0300	2020-09-25	2020-09-25 13:48:00 UTC	Buenos Aires	1111470	leoleiva	Leonardo Adrián LEIVA	2020-09-25 14:46:52 UTC	2020-09-26 19:39:00 UTC	research	CC-BY-NC	https://www.inaturalist.org/observations/60714931	https://inaturalist-open-data.s3.amazonaws.com/photos/97103259/medium.jpg				1	0	false		La Capital, Santa Fe, Argentina	-31.6681823611	-60.7643585								FALSE				La Capital	Santa Fe	Argentina	Santa Fe	La Capital	Ghost Bulimulus	Bulimulus bonariensis		Mollusca	831286	Bulimulus bonariensis		Eupulmonata	Stylommatophora	Orthalicoidea
60759674	2020/09/24 5:49 PM -0300	2020-09-24	2020-09-24 20:49:00 UTC	Buenos Aires	3639817	ninapiazzac	Nina P. C.	2020-09-25 21:55:18 UTC	2020-09-26 21:45:42 UTC	research	CC-BY	https://www.inaturalist.org/observations/60759674	https://inaturalist-open-data.s3.amazonaws.com/photos/97175304/medium.jpeg				2	1	false		Santa Fe, AR	-31.669988663	-60.7556140762	15				29199	obscured		TRUE				La Capital	Santa Fe	Argentina	Santa Fe	La Capital	Bulimulus bonariensis	Bulimulus bonariensis		Mollusca	831286	Bulimulus bonariensis		Eupulmonata	Stylommatophora	Orthalicoidea
60919249	2020/09/26 4:40 PM -03	2020-09-26	2020-09-26 19:40:00 UTC	Buenos Aires	2528876	c4m1l0	Camilo Garcia Gonzalez	2020-09-27 03:08:52 UTC	2020-10-05 01:45:10 UTC	research	CC-BY-NC	https://www.inaturalist.org/observations/60919249	https://inaturalist-open-data.s3.amazonaws.com/photos/97430332/medium.jpg				1	0	false		Soldini, Santa Fe, Argentina	-33.0176553318	-60.7491672412	142				142			FALSE			Soldini	Rosario	Santa Fe	Argentina	Santa Fe	Rosario	Ghost Bulimulus	Bulimulus bonariensis		Mollusca	831286	Bulimulus bonariensis		Eupulmonata	Stylommatophora	Orthalicoidea
61159705	2020/09/26 8:30 PM -0300	2020-09-26	2020-09-26 23:30:00 UTC	Buenos Aires	966066	silviolamothe		2020-09-28 23:35:48 UTC	2020-09-28 23:42:22 UTC	research	CC-BY-NC	https://www.inaturalist.org/observations/61159705	https://inaturalist-open-data.s3.amazonaws.com/photos/97840536/medium.jpeg				1	0	false		Gral Villegas, Provincia de Buenos Aires, Argentina	-35.0487173202	-63.0440475324	122				122			FALSE				General Villegas	Buenos Aires	Argentina	Buenos Aires	General Villegas	Bulimulus bonariensis	Bulimulus bonariensis		Mollusca	831286	Bulimulus bonariensis		Eupulmonata	Stylommatophora	Orthalicoidea
61418039	2020/09/26 4:39 PM -0300	2020-09-26	2020-09-26 19:39:00 UTC	Buenos Aires	2966277	juanagg	Juana Garcia Gonzalez	2020-10-01 19:31:41 UTC	2020-10-04 14:36:54 UTC	research	CC-BY-NC	https://www.inaturalist.org/observations/61418039	https://inaturalist-open-data.s3.amazonaws.com/photos/98275437/medium.jpeg				1	0	false		Soldini, Santa Fe, Argentina	-33.0174740913	-60.7489690843	4				4			FALSE			Soldini	Rosario	Santa Fe	Argentina	Santa Fe	Rosario	Bulimulus bonariensis	Bulimulus bonariensis		Mollusca	831286	Bulimulus bonariensis		Eupulmonata	Stylommatophora	Orthalicoidea
62199597	2013/12/06 11:03 AM -0300	2013-12-06	2013-12-06 14:03:00 UTC	Buenos Aires	144	trekman	Gustavo Fernando Durán	2020-10-10 15:06:33 UTC	2020-10-16 00:20:58 UTC	research	CC-BY-NC-SA	https://www.inaturalist.org/observations/62199597	https://inaturalist-open-data.s3.amazonaws.com/photos/99623819/medium.jpeg				1	0	false		La Capital, Santa Fe, Argentina	-31.6366920385	-60.6734279759	194				194			FALSE				La Capital	Santa Fe	Argentina	Santa Fe	La Capital	Bulimulus bonariensis	Bulimulus bonariensis		Mollusca	831286	Bulimulus bonariensis		Eupulmonata	Stylommatophora	Orthalicoidea
63292164	2020-10-22 11:35:28 PM GMT-03:00	2020-10-22	2020-10-23 02:35:28 UTC	Brasilia	2585272	berlartigau	Bernardo Lartigau	2020-10-23 02:38:07 UTC	2021-12-23 17:35:46 UTC	research	CC-BY-NC	https://www.inaturalist.org/observations/63292164	https://inaturalist-open-data.s3.amazonaws.com/photos/101552780/medium.jpeg				2	0	false	2	B1744, Provincia de Buenos Aires, Argentina	-34.63613117	-58.79393991	9				9			FALSE				Moreno	Buenos Aires	Argentina	Buenos Aires	Moreno	Ghost Bulimulus	Bulimulus bonariensis		Mollusca	831286	Bulimulus bonariensis		Eupulmonata	Stylommatophora	Orthalicoidea
63494969	2020-10-25 1:59:40 PM GMT-03:00	2020-10-25	2020-10-25 16:59:40 UTC	Brasilia	3672544	marcelo_07	Marcelo	2020-10-25 17:00:50 UTC	2020-11-08 11:49:47 UTC	research		https://www.inaturalist.org/observations/63494969	https://static.inaturalist.org/photos/101908891/medium.jpeg				1	0	false	2	San Andres de Giles, Provincia de Buenos Aires, Argentina	-34.4450277997	-59.4597267997								FALSE	gps	gps		San Andrés de Giles	Buenos Aires	Argentina	Buenos Aires	San Andrés de Giles	Ghost Bulimulus	Bulimulus bonariensis		Mollusca	831286	Bulimulus bonariensis		Eupulmonata	Stylommatophora	Orthalicoidea
63536920	2020-10-25 8:24:20 PM GMT-03:00	2020-10-25	2020-10-25 23:24:20 UTC	Brasilia	2585272	berlartigau	Bernardo Lartigau	2020-10-26 00:54:32 UTC	2023-06-17 22:17:23 UTC	research	CC-BY-NC	https://www.inaturalist.org/observations/63536920	https://inaturalist-open-data.s3.amazonaws.com/photos/101983437/medium.jpeg				2	0	false	2	B1744, Provincia de Buenos Aires, Argentina	-34.636226	-58.7939739722								FALSE	gps	gps		Moreno	Buenos Aires	Argentina	Buenos Aires	Moreno	Ghost Bulimulus	Bulimulus bonariensis		Mollusca	831286	Bulimulus bonariensis		Eupulmonata	Stylommatophora	Orthalicoidea
63991594	2020-10-31 10:39:20 AM GMT-03:00	2020-10-31	2020-10-31 13:39:20 UTC	Buenos Aires	2379506	seba_fornes	Sebastián Fornés	2020-11-01 21:14:42 UTC	2020-11-02 16:38:02 UTC	research		https://www.inaturalist.org/observations/63991594	https://static.inaturalist.org/photos/102796975/medium.jpeg				2	0	false	2	Puerto Madero, CABA, Argentina	-34.601759	-58.360081								FALSE	gps	gps		Distrito Federal	Ciudad de Buenos Aires	Argentina	Ciudad de Buenos Aires	Distrito Federal	Bulimulus bonariensis	Bulimulus bonariensis		Mollusca	831286	Bulimulus bonariensis		Eupulmonata	Stylommatophora	Orthalicoidea
64884769	2020-11-14 11:46:30 AM GMT-03:00	2020-11-14	2020-11-14 14:46:30 UTC	Brasilia	3574162	siempreverde		2020-11-14 21:15:31 UTC	2020-11-16 00:34:32 UTC	research	CC-BY-NC	https://www.inaturalist.org/observations/64884769	https://inaturalist-open-data.s3.amazonaws.com/photos/104385696/medium.jpeg				2	0	false	2	Paraná, Entre Ríos, Argentina	-31.7796419722	-60.486479								FALSE	gps	gps		Paraná	Entre Ríos	Argentina	Entre Ríos	Paraná	Bulimulus bonariensis	Bulimulus bonariensis		Mollusca	831286	Bulimulus bonariensis		Eupulmonata	Stylommatophora	Orthalicoidea
65018888	2020/11/16 1:16 PM -0300	2020-11-16	2020-11-16 16:16:00 UTC	Brasilia	2635156	gonzatrucco	Gonzalo Trucco	2020-11-16 16:23:53 UTC	2020-11-17 18:59:26 UTC	research	CC-BY-NC	https://www.inaturalist.org/observations/65018888	https://inaturalist-open-data.s3.amazonaws.com/photos/104615842/medium.jpeg				1	0	false		Oncativo, Córdoba, Argentina	-31.9134288	-63.6820629	1770				1770			FALSE				Rió Segundo	Córdoba	Argentina	Córdoba	Rió Segundo	Bulimulus bonariensis	Bulimulus bonariensis		Mollusca	831286	Bulimulus bonariensis		Eupulmonata	Stylommatophora	Orthalicoidea
65242232	2020/11/18 6:14 PM -0300	2020-11-18	2020-11-18 21:14:00 UTC	Brasilia	1398693	mendezcla7		2020-11-19 23:03:10 UTC	2021-01-12 19:12:45 UTC	research	CC-BY-NC	https://www.inaturalist.org/observations/65242232	https://inaturalist-open-data.s3.amazonaws.com/photos/104972995/medium.jpg				2	0	false		Dr. Manuel Argerich 10, B1629 Pilar, Provincia de Buenos Aires, Argentina	-34.4126543	-58.9159119	191				191			FALSE				Pilar	Buenos Aires	Argentina	Buenos Aires	Pilar	Ghost Bulimulus	Bulimulus bonariensis		Mollusca	831286	Bulimulus bonariensis		Eupulmonata	Stylommatophora	Orthalicoidea
65442803	2020-11-22 6:32:10 PM GMT-03:00	2020-11-22	2020-11-22 21:32:10 UTC	Brasilia	2424754	taielnazar	Taiel Nazar	2020-11-23 00:21:13 UTC	2023-07-08 00:41:12 UTC	research	CC-BY	https://www.inaturalist.org/observations/65442803	https://inaturalist-open-data.s3.amazonaws.com/photos/105334324/medium.jpeg			Encontrado dentro de las hojas de un Eryngium (o serrucheta, falso caraguata, etc).	2	0	false	2	Burzaco, Provincia de Buenos Aires, Argentina	-34.8440296427	-58.385883607	52				52			FALSE	gps	gps		Almirante Brown	Buenos Aires	Argentina	Buenos Aires	Almirante Brown	Ghost Bulimulus	Bulimulus bonariensis		Mollusca	831286	Bulimulus bonariensis		Eupulmonata	Stylommatophora	Orthalicoidea
65824390	2020-11-27 8:27:01 PM GMT-03:00	2020-11-27	2020-11-27 23:27:01 UTC	Brasilia	2424754	taielnazar	Taiel Nazar	2020-11-29 17:10:49 UTC	2023-07-08 00:24:26 UTC	research	CC-BY	https://www.inaturalist.org/observations/65824390	https://inaturalist-open-data.s3.amazonaws.com/photos/106011575/medium.jpeg			Hallado dentro de un Eryngium.	2	0	false	2	Burzaco, Provincia de Buenos Aires, Argentina	-34.8450072968	-58.3863922209	27				27			FALSE	gps	gps		Almirante Brown	Buenos Aires	Argentina	Buenos Aires	Almirante Brown	Ghost Bulimulus	Bulimulus bonariensis		Mollusca	831286	Bulimulus bonariensis		Eupulmonata	Stylommatophora	Orthalicoidea
66273307	2020/11/10 6:56 PM -0300	2020-11-10	2020-11-10 21:56:00 UTC	Buenos Aires	1205836	elbeltrocco	Eduardo Luis Beltrocco	2020-12-08 01:08:58 UTC	2021-01-12 23:56:57 UTC	research	CC-BY-NC	https://www.inaturalist.org/observations/66273307	https://inaturalist-open-data.s3.amazonaws.com/photos/106796597/medium.jpg				1	0	false		Sarmiento y Centenario, Santo Tome, Santa Fe	-31.6616575276	-60.7608092327	18				18			FALSE				La Capital	Santa Fe	Argentina	Santa Fe	La Capital	Ghost Bulimulus	Bulimulus bonariensis		Mollusca	831286	Bulimulus bonariensis		Eupulmonata	Stylommatophora	Orthalicoidea
66339618	2020/12/04 10:54 AM -0300	2020-12-04	2020-12-04 13:54:00 UTC	Buenos Aires	1454648	r-a-p	RAP	2020-12-09 18:00:17 UTC	2021-09-14 21:36:08 UTC	research	CC-BY-NC	https://www.inaturalist.org/observations/66339618	https://static.inaturalist.org/photos/106923549/medium.jpg			IZQUIERDA	1	0	false		Lago Lugano, Buenos Aires, Argentina	-34.6811316	-58.44516	356				356			FALSE				Distrito Federal	Ciudad de Buenos Aires	Argentina	Ciudad de Buenos Aires	Distrito Federal	Ghost Bulimulus	Bulimulus bonariensis		Mollusca	831286	Bulimulus bonariensis		Eupulmonata	Stylommatophora	Orthalicoidea
67022214	2020/12/17 3:54 PM -0300	2020-12-17	2020-12-17 18:54:00 UTC	Buenos Aires	144	trekman	Gustavo Fernando Durán	2020-12-24 22:18:53 UTC	2021-08-12 18:51:45 UTC	research	CC-BY-NC-SA	https://www.inaturalist.org/observations/67022214	https://inaturalist-open-data.s3.amazonaws.com/photos/108182834/medium.jpg				1	0	false		La Capital, Santa Fe, Argentina	-31.636171	-60.675238								FALSE				La Capital	Santa Fe	Argentina	Santa Fe	La Capital	Bulimulus bonariensis	Bulimulus bonariensis		Mollusca	831286	Bulimulus bonariensis		Eupulmonata	Stylommatophora	Orthalicoidea
67246402	2020-12-29 8:41:53 AM GMT-03:00	2020-12-29	2020-12-29 11:41:53 UTC	Buenos Aires	438241	soolquipildor	Sol Quipildor	2020-12-29 12:34:15 UTC	2023-07-08 02:22:56 UTC	research	CC-BY-SA	https://www.inaturalist.org/observations/67246402	https://inaturalist-open-data.s3.amazonaws.com/photos/108598934/medium.jpeg				1	0	false	2	Av. H. Yrigoyen - Entre San Lorenzo y Mariano Boedo, La Merced, Salta, Argentina	-24.965065075	-65.4890881111								FALSE	gps	gps		Cerrillos	Salta	Argentina	Salta	Cerrillos	Ghost Bulimulus	Bulimulus bonariensis		Mollusca	831286	Bulimulus bonariensis		Eupulmonata	Stylommatophora	Orthalicoidea
67263970	2020-12-29 8:49:29 AM GMT-03:00	2020-12-29	2020-12-29 11:49:29 UTC	Buenos Aires	438241	soolquipildor	Sol Quipildor	2020-12-29 20:03:44 UTC	2023-07-08 01:56:08 UTC	research	CC-BY-SA	https://www.inaturalist.org/observations/67263970	https://inaturalist-open-data.s3.amazonaws.com/photos/108633122/medium.jpeg				2	0	false	2	Av. H. Yrigoyen - Entre San Lorenzo y Mariano Boedo, La Merced, Salta, Argentina	-24.9649882	-65.488988								FALSE	gps	gps		Cerrillos	Salta	Argentina	Salta	Cerrillos	Bulimulus bonariensis	Bulimulus bonariensis		Mollusca	831286	Bulimulus bonariensis		Eupulmonata	Stylommatophora	Orthalicoidea
67634208	2021/01/02 10:38 AM -0300	2021-01-02	2021-01-02 13:38:00 UTC	Buenos Aires	1454648	r-a-p	RAP	2021-01-05 20:54:33 UTC	2023-06-27 11:26:54 UTC	research	CC-BY-NC	https://www.inaturalist.org/observations/67634208	https://static.inaturalist.org/photos/109322200/medium.jpg				1	0	false		Reserva Natural Pilar, Buenos Aires, Argentina	-34.412999457	-58.9162874222	121				121			FALSE				Pilar	Buenos Aires	Argentina	Buenos Aires	Pilar	Ghost Bulimulus	Bulimulus bonariensis		Mollusca	831286	Bulimulus bonariensis		Eupulmonata	Stylommatophora	Orthalicoidea
67720952	2021/01/06 9:58 AM -0300	2021-01-06	2021-01-06 12:58:00 UTC	Buenos Aires	1454648	r-a-p	RAP	2021-01-07 21:23:14 UTC	2021-09-14 21:36:08 UTC	research	CC-BY-NC	https://www.inaturalist.org/observations/67720952	https://static.inaturalist.org/photos/109488655/medium.jpg				2	0	false		Lago Lugano, Buenos Aires, Argentina	-34.6811316	-58.44516	356				356			FALSE				Distrito Federal	Ciudad de Buenos Aires	Argentina	Ciudad de Buenos Aires	Distrito Federal	Bulimulus bonariensis	Bulimulus bonariensis		Mollusca	831286	Bulimulus bonariensis		Eupulmonata	Stylommatophora	Orthalicoidea
68195914	2017/01/16 7:04 AM -0300	2017-01-16	2017-01-16 10:04:00 UTC	Buenos Aires	144	trekman	Gustavo Fernando Durán	2021-01-17 04:45:07 UTC	2021-01-21 18:54:37 UTC	research	CC-BY-NC-SA	https://www.inaturalist.org/observations/68195914	https://inaturalist-open-data.s3.amazonaws.com/photos/110333486/medium.jpg				1	0	false		Ciudad de Santa Fe, Provincia de Santa Fe, Argentina	-31.6211830206	-60.7017571958	6130				6130			FALSE				La Capital	Santa Fe	Argentina	Santa Fe	La Capital	Ghost Bulimulus	Bulimulus bonariensis		Mollusca	831286	Bulimulus bonariensis		Eupulmonata	Stylommatophora	Orthalicoidea
68195923	2017/01/20 7:01 AM -0300	2017-01-20	2017-01-20 10:01:00 UTC	Buenos Aires	144	trekman	Gustavo Fernando Durán	2021-01-17 04:45:11 UTC	2021-01-21 18:54:24 UTC	research	CC-BY-NC-SA	https://www.inaturalist.org/observations/68195923	https://inaturalist-open-data.s3.amazonaws.com/photos/110333705/medium.jpg				1	0	false		Ciudad de Santa Fe, Provincia de Santa Fe, Argentina	-31.6211830206	-60.7017571958	6130				6130			FALSE				La Capital	Santa Fe	Argentina	Santa Fe	La Capital	Ghost Bulimulus	Bulimulus bonariensis		Mollusca	831286	Bulimulus bonariensis		Eupulmonata	Stylommatophora	Orthalicoidea
68195975	2017/02/15 7:02 AM -0300	2017-02-15	2017-02-15 10:02:00 UTC	Buenos Aires	144	trekman	Gustavo Fernando Durán	2021-01-17 04:45:35 UTC	2021-01-21 18:54:23 UTC	research	CC-BY-NC-SA	https://www.inaturalist.org/observations/68195975	https://inaturalist-open-data.s3.amazonaws.com/photos/110338937/medium.jpg				1	0	false		Ciudad de Santa Fe, Provincia de Santa Fe, Argentina	-31.6211830206	-60.7017571958	6130				6130			FALSE				La Capital	Santa Fe	Argentina	Santa Fe	La Capital	Ghost Bulimulus	Bulimulus bonariensis		Mollusca	831286	Bulimulus bonariensis		Eupulmonata	Stylommatophora	Orthalicoidea
68289959	2017/08/04 5:33 PM -0300	2017-08-04	2017-08-04 20:33:00 UTC	Buenos Aires	144	trekman	Gustavo Fernando Durán	2021-01-18 20:51:35 UTC	2021-01-20 19:24:22 UTC	research	CC-BY-NC-SA	https://www.inaturalist.org/observations/68289959	https://inaturalist-open-data.s3.amazonaws.com/photos/110529112/medium.jpg				2	0	false		Ciudad de Santa Fe, Provincia de Santa Fe, Argentina	-31.6294558342	-60.7075771607	4880				4880			FALSE				La Capital	Santa Fe	Argentina	Santa Fe	La Capital	Bulimulus bonariensis	Bulimulus bonariensis		Mollusca	831286	Bulimulus bonariensis		Eupulmonata	Stylommatophora	Orthalicoidea
68290025	2017/10/09 7:03 AM -0300	2017-10-09	2017-10-09 10:03:00 UTC	Buenos Aires	144	trekman	Gustavo Fernando Durán	2021-01-18 20:52:41 UTC	2021-01-20 19:24:25 UTC	research	CC-BY-NC-SA	https://www.inaturalist.org/observations/68290025	https://inaturalist-open-data.s3.amazonaws.com/photos/110530131/medium.jpg				1	0	false		Ciudad de Santa Fe, Provincia de Santa Fe, Argentina	-31.647626	-60.720531	100				100			FALSE				La Capital	Santa Fe	Argentina	Santa Fe	La Capital	Ghost Bulimulus	Bulimulus bonariensis		Mollusca	831286	Bulimulus bonariensis		Eupulmonata	Stylommatophora	Orthalicoidea
68374955	2021/01/19 11:42 AM -0300	2021-01-19	2021-01-19 14:42:00 UTC	Buenos Aires	1454648	r-a-p	RAP	2021-01-20 18:49:00 UTC	2021-09-14 21:36:08 UTC	research	CC-BY-NC	https://www.inaturalist.org/observations/68374955	https://static.inaturalist.org/photos/110697874/medium.jpg				1	0	false		Lago Lugano, Buenos Aires, Argentina	-34.6811316	-58.44516	356				356			FALSE				Distrito Federal	Ciudad de Buenos Aires	Argentina	Ciudad de Buenos Aires	Distrito Federal	Ghost Bulimulus	Bulimulus bonariensis		Mollusca	831286	Bulimulus bonariensis		Eupulmonata	Stylommatophora	Orthalicoidea
68487974	2021/01/12 8:23 AM -0300	2021-01-12	2021-01-12 11:23:00 UTC	Brasilia	3670694	graciela_gplp		2021-01-23 12:45:49 UTC	2022-01-12 20:07:38 UTC	research	CC-BY-NC	https://www.inaturalist.org/observations/68487974	https://inaturalist-open-data.s3.amazonaws.com/photos/110909185/medium.jpeg				2	0	false		Maracó, La Pampa, Argentina	-35.6972878056	-63.7202574208	581				581			FALSE				Maracó	La Pampa	Argentina	La Pampa	Maracó	Ghost Bulimulus	Bulimulus bonariensis		Mollusca	831286	Bulimulus bonariensis		Eupulmonata	Stylommatophora	Orthalicoidea
68942945	2021/01/19 8:55 AM HST	2021-01-19	2021-01-19 18:55:00 UTC	Hawaii	854602	juanmago	Juan Matías	2021-02-02 02:08:25 UTC	2021-02-02 22:50:16 UTC	research	CC-BY-NC	https://www.inaturalist.org/observations/68942945	https://inaturalist-open-data.s3.amazonaws.com/photos/111758641/medium.jpeg				2	0	false		Rivadavia, Provincia de Buenos Aires, Argentina	-35.5692139582	-63.3379113071	267				267			FALSE				Rivadavia	Buenos Aires	Argentina	Buenos Aires	Rivadavia	Bulimulus bonariensis	Bulimulus bonariensis		Mollusca	831286	Bulimulus bonariensis		Eupulmonata	Stylommatophora	Orthalicoidea
69215974	2021/02/07 10:45 AM -0300	2021-02-07	2021-02-07 13:45:00 UTC	Buenos Aires	2481121	bahianoayala	Bahiano Ayala	2021-02-07 19:25:53 UTC	2023-07-08 02:42:12 UTC	research	CC-BY	https://www.inaturalist.org/observations/69215974	https://inaturalist-open-data.s3.amazonaws.com/photos/112266712/medium.jpg				2	0	false		Llavallol, Provincia de Buenos Aires, Argentina	-34.78383598	-58.4345578244	8				8			FALSE				Lomas de Zamora	Buenos Aires	Argentina	Buenos Aires	Lomas de Zamora	Ghost Bulimulus	Bulimulus bonariensis		Mollusca	831286	Bulimulus bonariensis		Eupulmonata	Stylommatophora	Orthalicoidea
69235463	2021/02/06 10:36 AM -0300	2021-02-06	2021-02-06 13:36:00 UTC	Buenos Aires	972932	ejnadal	Eduardo Nadal	2021-02-08 01:52:04 UTC	2021-10-14 10:27:16 UTC	research	CC-BY-NC	https://www.inaturalist.org/observations/69235463	https://inaturalist-open-data.s3.amazonaws.com/photos/112302647/medium.jpg				2	0	false		Dock Sud, Provincia de Buenos Aires, Argentina	-34.6652483333	-58.31812								FALSE				Avellaneda	Buenos Aires	Argentina	Buenos Aires	Avellaneda	Ghost Bulimulus	Bulimulus bonariensis		Mollusca	831286	Bulimulus bonariensis		Eupulmonata	Stylommatophora	Orthalicoidea
69471843	Fri Feb 12 2021 17:28:53 GMT-0300 (GMT-3)	2021-02-12	2021-02-12 20:28:53 UTC	Buenos Aires	1355443	mnomg	Mariano Ordoñez	2021-02-12 21:14:23 UTC	2021-02-13 17:59:03 UTC	research		https://www.inaturalist.org/observations/69471843	https://static.inaturalist.org/photos/112729124/medium.jpg				1	0	false	3	General Mosconi, Firmat (General López), Santa Fe, AR	-33.46635	-61.4881666667	48				48			FALSE				General López	Santa Fe	Argentina	Santa Fe	General López	Ghost Bulimulus	Bulimulus bonariensis		Mollusca	831286	Bulimulus bonariensis		Eupulmonata	Stylommatophora	Orthalicoidea
69539204	2021/02/13 9:12 AM HST	2021-02-13	2021-02-13 19:12:00 UTC	Hawaii	854602	juanmago	Juan Matías	2021-02-14 03:01:45 UTC	2021-12-16 21:25:07 UTC	research	CC-BY-NC	https://www.inaturalist.org/observations/69539204	https://inaturalist-open-data.s3.amazonaws.com/photos/112853341/medium.jpeg				2	0	false		Maracó, La Pampa, Argentina	-35.5600235264	-63.4491051755	654				654			FALSE				Maracó	La Pampa	Argentina	La Pampa	Maracó	Ghost Bulimulus	Bulimulus bonariensis		Mollusca	831286	Bulimulus bonariensis		Eupulmonata	Stylommatophora	Orthalicoidea
69564487	2021/02/13 9:51 AM HST	2021-02-13	2021-02-13 19:51:00 UTC	Hawaii	854602	juanmago	Juan Matías	2021-02-14 16:09:07 UTC	2021-07-01 11:55:47 UTC	research	CC-BY-NC	https://www.inaturalist.org/observations/69564487	https://inaturalist-open-data.s3.amazonaws.com/photos/112901262/medium.jpeg				2	0	false		Maracó, La Pampa, Argentina	-35.5596899604	-63.4651474888	891				891			FALSE				Maracó	La Pampa	Argentina	La Pampa	Maracó	Ghost Bulimulus	Bulimulus bonariensis		Mollusca	831286	Bulimulus bonariensis		Eupulmonata	Stylommatophora	Orthalicoidea
69600253	2021/02/09 7:51 AM -0300	2021-02-09	2021-02-09 10:51:00 UTC	Buenos Aires	144	trekman	Gustavo Fernando Durán	2021-02-15 03:40:44 UTC	2021-02-16 01:25:20 UTC	research	CC-BY-NC-SA	https://www.inaturalist.org/observations/69600253	https://inaturalist-open-data.s3.amazonaws.com/photos/112964000/medium.jpg				1	0	false		General Obligado, Santa Fe, Argentina	-28.5103599722	-59.2619889722								FALSE				General Obligado	Santa Fe	Argentina	Santa Fe	General Obligado	Ghost Bulimulus	Bulimulus bonariensis		Mollusca	831286	Bulimulus bonariensis		Eupulmonata	Stylommatophora	Orthalicoidea
69651856	2021/02/13 2:11 PM HST	2021-02-13	2021-02-14 00:11:00 UTC	Hawaii	854602	juanmago	Juan Matías	2021-02-16 02:59:21 UTC	2021-02-17 01:15:22 UTC	research	CC-BY-NC	https://www.inaturalist.org/observations/69651856	https://inaturalist-open-data.s3.amazonaws.com/photos/113063516/medium.jpeg				1	0	false		Maracó, La Pampa, Argentina	-35.5747518069	-63.5448284565	364				364			FALSE				Maracó	La Pampa	Argentina	La Pampa	Maracó	Ghost Bulimulus	Bulimulus bonariensis		Mollusca	831286	Bulimulus bonariensis		Eupulmonata	Stylommatophora	Orthalicoidea
69733989	2021/01/10 11:01 AM -0300	2021-01-10	2021-01-10 14:01:00 UTC	Buenos Aires	1454648	r-a-p	RAP	2021-02-17 20:31:56 UTC	2021-09-14 21:36:08 UTC	research	CC-BY-NC	https://www.inaturalist.org/observations/69733989	https://static.inaturalist.org/photos/113218146/medium.jpg				1	0	false		Reserva Natural Pilar, Buenos Aires, Argentina	-34.412999457	-58.9162874222	121				121			FALSE				Pilar	Buenos Aires	Argentina	Buenos Aires	Pilar	Ghost Bulimulus	Bulimulus bonariensis		Mollusca	831286	Bulimulus bonariensis		Eupulmonata	Stylommatophora	Orthalicoidea
69866779	2021/02/09 8:54 AM -0300	2021-02-09	2021-02-09 11:54:00 UTC	Buenos Aires	144	trekman	Gustavo Fernando Durán	2021-02-20 16:37:22 UTC	2021-02-21 22:14:10 UTC	research	CC-BY-NC-SA	https://www.inaturalist.org/observations/69866779	https://inaturalist-open-data.s3.amazonaws.com/photos/113464215/medium.jpeg				1	0	false		Gral Obligado, Santa Fe, Argentina	-28.5102913272	-59.2619732581	126				126			FALSE				General Obligado	Santa Fe	Argentina	Santa Fe	General Obligado	Ghost Bulimulus	Bulimulus bonariensis		Mollusca	831286	Bulimulus bonariensis		Eupulmonata	Stylommatophora	Orthalicoidea
69945893	2021/02/15 8:21 AM -0300	2021-02-15	2021-02-15 11:21:00 UTC	Buenos Aires	472014	jjbonannod	Juan José Bonanno	2021-02-21 21:04:01 UTC	2021-02-26 22:10:59 UTC	research	CC-BY-NC	https://www.inaturalist.org/observations/69945893	https://inaturalist-open-data.s3.amazonaws.com/photos/113612985/medium.jpg				1	0	false		Isla Martín García, Provincia de Buenos Aires, Argentina	-34.1852459474	-58.2514722156	468				468			FALSE				San Fernando (1)	Buenos Aires	Argentina	Buenos Aires	San Fernando (1)	Ghost Bulimulus	Bulimulus bonariensis		Mollusca	831286	Bulimulus bonariensis		Eupulmonata	Stylommatophora	Orthalicoidea
70425007	2021-03-01 9:42:43 AM GMT-03:00	2021-03-01	2021-03-01 12:42:43 UTC	Brasilia	2424754	taielnazar	Taiel Nazar	2021-03-02 01:48:30 UTC	2023-07-08 03:26:11 UTC	research	CC-BY	https://www.inaturalist.org/observations/70425007	https://inaturalist-open-data.s3.amazonaws.com/photos/114486232/medium.jpeg				1	0	false	2	Longchamps, Provincia de Buenos Aires, Argentina	-34.8602839365	-58.4168919548	289				289			FALSE	gps	gps		Almirante Brown	Buenos Aires	Argentina	Buenos Aires	Almirante Brown	Bulimulus bonariensis	Bulimulus bonariensis		Mollusca	831286	Bulimulus bonariensis		Eupulmonata	Stylommatophora	Orthalicoidea
70427828	2021/03/01 9:43 AM -0300	2021-03-01	2021-03-01 12:43:00 UTC	Buenos Aires	2481121	bahianoayala	Bahiano Ayala	2021-03-02 02:50:52 UTC	2023-07-08 03:32:39 UTC	research	CC-BY	https://www.inaturalist.org/observations/70427828	https://inaturalist-open-data.s3.amazonaws.com/photos/114491079/medium.jpg			No estaba truncado, se partió al manipularlo.	1	0	false		Longchamps, Provincia de Buenos Aires, Argentina	-34.8566364041	-58.4187435076	4				4			FALSE				Almirante Brown	Buenos Aires	Argentina	Buenos Aires	Almirante Brown	Ghost Bulimulus	Bulimulus bonariensis		Mollusca	831286	Bulimulus bonariensis		Eupulmonata	Stylommatophora	Orthalicoidea
70528289	2017/10/27 12:00 AM -03	2017-10-27	2017-10-27 03:00:00 UTC	Buenos Aires	782244	yamilcotsali	Yamil Pablo	2021-03-04 00:16:37 UTC	2021-04-10 13:43:14 UTC	research		https://www.inaturalist.org/observations/70528289	https://static.inaturalist.org/photos/114674796/medium.jpeg				1	0	false		Olavarría, Provincia de Buenos Aires, Argentina	-36.8937167	-60.3233499	20970				20970			FALSE				Olavarría	Buenos Aires	Argentina	Buenos Aires	Olavarría	Bulimulus bonariensis	Bulimulus bonariensis		Mollusca	831286	Bulimulus bonariensis		Eupulmonata	Stylommatophora	Orthalicoidea
70846786	2021/03/07 9:04 AM -0300	2021-03-07	2021-03-07 12:04:00 UTC	Buenos Aires	893121	martin_arregui	Martin Arregui	2021-03-09 00:28:12 UTC	2021-03-12 12:59:12 UTC	research	CC-BY-NC	https://www.inaturalist.org/observations/70846786	https://inaturalist-open-data.s3.amazonaws.com/photos/115249755/medium.jpeg				1	0	false		Berisso, Provincia de Buenos Aires, Argentina	-34.869698389	-57.8299453642	358				358			FALSE				Berisso	Buenos Aires	Argentina	Buenos Aires	Berisso	Ghost Bulimulus	Bulimulus bonariensis		Mollusca	831286	Bulimulus bonariensis		Eupulmonata	Stylommatophora	Orthalicoidea
71223189	2021/03/14 10:12 AM -0300	2021-03-14	2021-03-14 13:12:00 UTC	Buenos Aires	915765	magcl	Malena Lorente	2021-03-14 16:23:07 UTC	2021-07-26 20:28:45 UTC	research	CC-BY	https://www.inaturalist.org/observations/71223189	https://inaturalist-open-data.s3.amazonaws.com/photos/115922160/medium.jpeg				2	0	false		La Plata, Provincia de Buenos Aires, Argentina	-34.9112361677	-57.9250844577	11				11			FALSE				La Plata	Buenos Aires	Argentina	Buenos Aires	La Plata	Ghost Bulimulus	Bulimulus bonariensis		Mollusca	831286	Bulimulus bonariensis		Eupulmonata	Stylommatophora	Orthalicoidea
71449785	Wed Mar 17 2021 15:52:53 GMT-0300 (GMT-3)	2021-03-17	2021-03-17 18:52:53 UTC	Buenos Aires	2551145	alfanova	Valentín Alfano	2021-03-17 22:23:04 UTC	2021-11-24 18:16:39 UTC	research	CC-BY-NC	https://www.inaturalist.org/observations/71449785	https://inaturalist-open-data.s3.amazonaws.com/photos/116329457/medium.jpg			21mm	2	0	false	3	Coronel Pringles, Coronel Pringles, Buenos Aires, AR	-37.97790833	-61.390725	5				5			FALSE				Coronel Pringles	Buenos Aires	Argentina	Buenos Aires	Coronel Pringles	Ghost Bulimulus	Bulimulus bonariensis		Mollusca	831286	Bulimulus bonariensis		Eupulmonata	Stylommatophora	Orthalicoidea
71955216	2021/03/24 11:28 AM -0300	2021-03-24	2021-03-24 14:28:00 UTC	Brasilia	3647285	svr78	svr78	2021-03-24 16:44:43 UTC	2021-03-25 04:05:47 UTC	research	CC-BY-NC	https://www.inaturalist.org/observations/71955216	https://inaturalist-open-data.s3.amazonaws.com/photos/117233063/medium.jpg				1	0	false		Int. Alvear, La Pampa, Argentina	-35.2320082323	-63.6020251371	33				33			FALSE				Chapaleufú	La Pampa	Argentina	La Pampa	Chapaleufú	Bulimulus bonariensis	Bulimulus bonariensis		Mollusca	831286	Bulimulus bonariensis		Eupulmonata	Stylommatophora	Orthalicoidea
72796808	2021/04/03 9:51 AM -0300	2021-04-03	2021-04-03 12:51:00 UTC	Buenos Aires	144	trekman	Gustavo Fernando Durán	2021-04-03 17:29:27 UTC	2021-04-09 18:42:47 UTC	research	CC-BY-NC-SA	https://www.inaturalist.org/observations/72796808	https://inaturalist-open-data.s3.amazonaws.com/photos/118756348/medium.jpeg				1	0	false		La Capital, Santa Fe, Argentina	-31.6685842701	-60.7155121228	169				169			FALSE				La Capital	Santa Fe	Argentina	Santa Fe	La Capital	Ghost Bulimulus	Bulimulus bonariensis		Mollusca	831286	Bulimulus bonariensis		Eupulmonata	Stylommatophora	Orthalicoidea
72938940	2021/04/03 9:58 AM -0300	2021-04-03	2021-04-03 12:58:00 UTC	Buenos Aires	1454648	r-a-p	RAP	2021-04-04 21:23:29 UTC	2021-09-14 21:36:08 UTC	research	CC-BY-NC	https://www.inaturalist.org/observations/72938940	https://static.inaturalist.org/photos/119008950/medium.jpg				1	0	false		Saavedra, CABA, Argentina	-34.559995	-58.500643	142				142			FALSE				Distrito Federal	Ciudad de Buenos Aires	Argentina	Ciudad de Buenos Aires	Distrito Federal	Bulimulus bonariensis	Bulimulus bonariensis		Mollusca	831286	Bulimulus bonariensis		Eupulmonata	Stylommatophora	Orthalicoidea
73309121	2021/04/08 11:22 AM -0300	2021-04-08	2021-04-08 14:22:00 UTC	Buenos Aires	2642814	ariadna09	Ariadna	2021-04-08 16:13:15 UTC	2021-08-12 18:53:52 UTC	research	CC-BY-NC	https://www.inaturalist.org/observations/73309121	https://inaturalist-open-data.s3.amazonaws.com/photos/119664654/medium.jpg				1	0	false		Santo Tomé, Santa Fe, Argentina	-31.680917	-60.756712								FALSE				La Capital	Santa Fe	Argentina	Santa Fe	La Capital	Ghost Bulimulus	Bulimulus bonariensis		Mollusca	831286	Bulimulus bonariensis		Eupulmonata	Stylommatophora	Orthalicoidea
73893491	2021-04-13 12:01:37 PM GMT-03:00	2021-04-13	2021-04-13 15:01:37 UTC	Brasilia	3574162	siempreverde		2021-04-13 23:32:36 UTC	2021-04-28 18:52:50 UTC	research	CC-BY-NC	https://www.inaturalist.org/observations/73893491	https://inaturalist-open-data.s3.amazonaws.com/photos/120701835/medium.jpeg				1	0	false	2	Paraná, Entre Ríos, Argentina	-31.77945	-60.486355								FALSE	gps	gps		Paraná	Entre Ríos	Argentina	Entre Ríos	Paraná	Ghost Bulimulus	Bulimulus bonariensis		Mollusca	831286	Bulimulus bonariensis		Eupulmonata	Stylommatophora	Orthalicoidea
73903894	2021/04/12 5:22 PM HST	2021-04-12	2021-04-13 03:22:00 UTC	Hawaii	854602	juanmago	Juan Matías	2021-04-14 01:37:05 UTC	2021-04-14 22:20:31 UTC	research	CC-BY-NC	https://www.inaturalist.org/observations/73903894	https://inaturalist-open-data.s3.amazonaws.com/photos/120717258/medium.jpeg				2	0	false		González Moreno, Provincia de Buenos Aires, Argentina	-35.5530767907	-63.3815824845	1170				1170			FALSE				Rivadavia	Buenos Aires	Argentina	Buenos Aires	Rivadavia	Bulimulus bonariensis	Bulimulus bonariensis		Mollusca	831286	Bulimulus bonariensis		Eupulmonata	Stylommatophora	Orthalicoidea
74166233	2021/04/14 11:43 AM -0300	2021-04-14	2021-04-14 14:43:00 UTC	Buenos Aires	1454648	r-a-p	RAP	2021-04-16 19:22:26 UTC	2021-09-14 21:36:08 UTC	research	CC-BY-NC	https://www.inaturalist.org/observations/74166233	https://static.inaturalist.org/photos/121181241/medium.jpg				2	0	false		Lago Lugano, Buenos Aires, Argentina	-34.6811316	-58.44516	356				356			FALSE				Distrito Federal	Ciudad de Buenos Aires	Argentina	Ciudad de Buenos Aires	Distrito Federal	Bulimulus bonariensis	Bulimulus bonariensis		Mollusca	831286	Bulimulus bonariensis		Eupulmonata	Stylommatophora	Orthalicoidea
74543626	2021/04/14 11:01 AM -0300	2021-04-14	2021-04-14 14:01:00 UTC	Buenos Aires	1454648	r-a-p	RAP	2021-04-19 18:44:44 UTC	2021-09-14 21:36:08 UTC	research	CC-BY-NC	https://www.inaturalist.org/observations/74543626	https://static.inaturalist.org/photos/121841778/medium.jpg				1	0	false		Lago Lugano, Buenos Aires, Argentina	-34.6811316	-58.44516	356				356			FALSE				Distrito Federal	Ciudad de Buenos Aires	Argentina	Ciudad de Buenos Aires	Distrito Federal	Ghost Bulimulus	Bulimulus bonariensis		Mollusca	831286	Bulimulus bonariensis		Eupulmonata	Stylommatophora	Orthalicoidea
74762775	2021/03/17 8:49 AM -0300	2021-03-17	2021-03-17 11:49:00 UTC	Buenos Aires	1383117	rguller	Roberto Guller	2021-04-21 19:29:29 UTC	2021-04-22 16:03:46 UTC	research	CC-BY-NC	https://www.inaturalist.org/observations/74762775	https://inaturalist-open-data.s3.amazonaws.com/photos/122231240/medium.jpg				1	0	false		Puerto Iguazú, Misiones, Argentina	-25.5954838515	-54.5505599815	15				15			FALSE				Iguazú	Misiones	Argentina	Misiones	Iguazú	Ghost Bulimulus	Bulimulus bonariensis		Mollusca	831286	Bulimulus bonariensis		Eupulmonata	Stylommatophora	Orthalicoidea
74766571	2021/04/20 11:13 AM -0300	2021-04-20	2021-04-20 14:13:00 UTC	Buenos Aires	1454648	r-a-p	RAP	2021-04-21 20:08:12 UTC	2021-09-14 21:36:08 UTC	research	CC-BY-NC	https://www.inaturalist.org/observations/74766571	https://static.inaturalist.org/photos/122237588/medium.jpg				2	0	false		Lago Lugano, Buenos Aires, Argentina	-34.6811316	-58.44516	356				356			FALSE				Distrito Federal	Ciudad de Buenos Aires	Argentina	Ciudad de Buenos Aires	Distrito Federal	Bulimulus bonariensis	Bulimulus bonariensis		Mollusca	831286	Bulimulus bonariensis		Eupulmonata	Stylommatophora	Orthalicoidea
75137721	2021/04/23 5:47 PM HST	2021-04-23	2021-04-24 03:47:00 UTC	Hawaii	854602	juanmago	Juan Matías	2021-04-25 04:22:08 UTC	2021-04-27 19:19:48 UTC	research	CC-BY-NC	https://www.inaturalist.org/observations/75137721	https://inaturalist-open-data.s3.amazonaws.com/photos/122885459/medium.jpeg				1	0	false		González Moreno, Provincia de Buenos Aires, Argentina	-35.5603604787	-63.386573214	2140				2140			FALSE				Rivadavia	Buenos Aires	Argentina	Buenos Aires	Rivadavia	Ghost Bulimulus	Bulimulus bonariensis		Mollusca	831286	Bulimulus bonariensis		Eupulmonata	Stylommatophora	Orthalicoidea
75141384	2021-04-24 3:52:28 PM GMT-03:00	2021-04-24	2021-04-24 18:52:28 UTC	Brasilia	4232371	carlos1447	Carlos Rossello	2021-04-25 05:24:52 UTC	2021-05-16 04:02:58 UTC	research		https://www.inaturalist.org/observations/75141384	https://static.inaturalist.org/photos/122894499/medium.jpeg				1	0	false	2	P3600, Formosa, Argentina	-26.1697894227	-58.1937184185	20				20			FALSE	gps	gps		Formosa	Formosa	Argentina	Formosa	Formosa	Ghost Bulimulus	Bulimulus bonariensis		Mollusca	831286	Bulimulus bonariensis		Eupulmonata	Stylommatophora	Orthalicoidea
75233910	2021/03/29 9:32 AM -0300	2021-03-29	2021-03-29 12:32:00 UTC	Buenos Aires	2820474	hugoalbertovalderrey	Hugo	2021-04-25 21:23:18 UTC	2021-04-27 21:16:05 UTC	research	CC-BY-NC	https://www.inaturalist.org/observations/75233910	https://inaturalist-open-data.s3.amazonaws.com/photos/123051828/medium.jpg				1	0	false		Maracó, La Pampa, Argentina	-35.68307	-63.6901066667								FALSE				Maracó	La Pampa	Argentina	La Pampa	Maracó	Bulimulus bonariensis	Bulimulus bonariensis		Mollusca	831286	Bulimulus bonariensis		Eupulmonata	Stylommatophora	Orthalicoidea
75313286	2021/03/29 9:32 AM -0300	2021-03-29	2021-03-29 12:32:00 UTC	Buenos Aires	2820474	hugoalbertovalderrey	Hugo	2021-04-26 14:33:46 UTC	2021-04-26 22:41:55 UTC	research	CC-BY-NC	https://www.inaturalist.org/observations/75313286	https://inaturalist-open-data.s3.amazonaws.com/photos/123196000/medium.jpg				2	0	false		Maracó, La Pampa, Argentina	-35.68307	-63.6901066667								FALSE				Maracó	La Pampa	Argentina	La Pampa	Maracó	Bulimulus bonariensis	Bulimulus bonariensis		Mollusca	831286	Bulimulus bonariensis		Eupulmonata	Stylommatophora	Orthalicoidea
75678223	2021/04/28 10:20 AM -0300	2021-04-28	2021-04-28 13:20:00 UTC	Buenos Aires	1454648	r-a-p	RAP	2021-04-29 18:13:06 UTC	2021-09-14 21:36:08 UTC	research	CC-BY-NC	https://www.inaturalist.org/observations/75678223	https://static.inaturalist.org/photos/123837756/medium.jpg				1	0	false		Saavedra, CABA, Argentina	-34.559995	-58.500643	142				142			FALSE				Distrito Federal	Ciudad de Buenos Aires	Argentina	Ciudad de Buenos Aires	Distrito Federal	Bulimulus bonariensis	Bulimulus bonariensis		Mollusca	831286	Bulimulus bonariensis		Eupulmonata	Stylommatophora	Orthalicoidea
75710203	2020/02/21 8:47 PM UTC	2020-02-21	2020-02-21 20:47:00 UTC	UTC	2812190	margaritacervio	Margarita Cervio	2021-04-29 23:10:59 UTC	2021-10-26 17:35:33 UTC	research		https://www.inaturalist.org/observations/75710203	https://static.inaturalist.org/photos/123893711/medium.jpeg				2	0	false		Maracó, La Pampa, Argentina	-35.6902433333	-63.7017566667								FALSE				Maracó	La Pampa	Argentina	La Pampa	Maracó	Bulimulus bonariensis	Bulimulus bonariensis		Mollusca	831286	Bulimulus bonariensis		Eupulmonata	Stylommatophora	Orthalicoidea
75916356	2021-04-30 17:07:27	2021-04-30	2021-04-30 20:07:27 UTC	Buenos Aires	2723799	aceci	Cecilia	2021-04-30 20:08:22 UTC	2021-04-30 23:51:24 UTC	research	CC-BY-NC	https://www.inaturalist.org/observations/75916356	https://inaturalist-open-data.s3.amazonaws.com/photos/124218023/medium.jpeg				2	0	false	2	Villa María, Córdoba, Argentina	-32.4163928427	-63.2635496579	12				12			FALSE				General San Martín	Córdoba	Argentina	Córdoba	General San Martín	Bulimulus bonariensis	Bulimulus bonariensis		Mollusca	831286	Bulimulus bonariensis		Eupulmonata	Stylommatophora	Orthalicoidea
75995086	2021/04/30 12:38 PM -0300	2021-04-30	2021-04-30 15:38:00 UTC	Buenos Aires	1205836	elbeltrocco	Eduardo Luis Beltrocco	2021-05-01 01:10:05 UTC	2021-05-05 16:17:53 UTC	research	CC-BY-NC	https://www.inaturalist.org/observations/75995086	https://inaturalist-open-data.s3.amazonaws.com/photos/124336457/medium.jpg				1	0	false		Sarmiento y Centenario, Santo Tome, Santa Fe	-31.6616575276	-60.7608092327	18				18			FALSE				La Capital	Santa Fe	Argentina	Santa Fe	La Capital	Ghost Bulimulus	Bulimulus bonariensis		Mollusca	831286	Bulimulus bonariensis		Eupulmonata	Stylommatophora	Orthalicoidea
76133038	2021-04-30 14:04:00	2021-04-30	2021-04-30 17:04:00 UTC	Buenos Aires	2812190	margaritacervio	Margarita Cervio	2021-05-01 13:44:57 UTC	2021-05-03 21:27:42 UTC	research		https://www.inaturalist.org/observations/76133038	https://static.inaturalist.org/photos/124556491/medium.jpeg				2	0	false	2	Gral. Pico, La Pampa, Argentina	-35.6585917901	-63.7676717062	6				6			FALSE				Maracó	La Pampa	Argentina	La Pampa	Maracó	Ghost Bulimulus	Bulimulus bonariensis		Mollusca	831286	Bulimulus bonariensis		Eupulmonata	Stylommatophora	Orthalicoidea
76325314	2021/05/01 10:47 AM -0300	2021-05-01	2021-05-01 13:47:00 UTC	Buenos Aires	2820474	hugoalbertovalderrey	Hugo	2021-05-01 22:43:46 UTC	2021-10-25 04:44:49 UTC	research	CC-BY-NC	https://www.inaturalist.org/observations/76325314	https://inaturalist-open-data.s3.amazonaws.com/photos/124852520/medium.jpg				2	0	false		Maracó, La Pampa, Argentina	-35.7343583333	-63.8283								FALSE				Maracó	La Pampa	Argentina	La Pampa	Maracó	Ghost Bulimulus	Bulimulus bonariensis		Mollusca	831286	Bulimulus bonariensis		Eupulmonata	Stylommatophora	Orthalicoidea
76368514	2021/04/30 12:23 PM HST	2021-04-30	2021-04-30 22:23:00 UTC	Hawaii	854602	juanmago	Juan Matías	2021-05-02 01:08:36 UTC	2021-05-02 12:17:07 UTC	research	CC-BY-NC	https://www.inaturalist.org/observations/76368514	https://inaturalist-open-data.s3.amazonaws.com/photos/124892523/medium.jpeg				1	0	false		González Moreno, Provincia de Buenos Aires, Argentina	-35.5605194432	-63.3865745551	1876				1876			FALSE				Rivadavia	Buenos Aires	Argentina	Buenos Aires	Rivadavia	Bulimulus bonariensis	Bulimulus bonariensis		Mollusca	831286	Bulimulus bonariensis		Eupulmonata	Stylommatophora	Orthalicoidea
76746957	2021/05/02 11:28 AM -0300	2021-05-02	2021-05-02 14:28:00 UTC	Buenos Aires	1312003	gustavoherrera	Gustavo Herrera	2021-05-02 23:30:43 UTC	2023-11-19 01:59:37 UTC	research	CC-BY-NC	https://www.inaturalist.org/observations/76746957	https://inaturalist-open-data.s3.amazonaws.com/photos/125519483/medium.jpeg				2	0	false		La Plata, Provincia de Buenos Aires, Argentina	-34.9052029559	-57.9332685533	4				4			FALSE				La Plata	Buenos Aires	Argentina	Buenos Aires	La Plata	Bulimulus bonariensis	Bulimulus bonariensis		Mollusca	831286	Bulimulus bonariensis		Eupulmonata	Stylommatophora	Orthalicoidea
76770553	2021/05/02 11:10 AM -0300	2021-05-02	2021-05-02 14:10:00 UTC	Buenos Aires	429193	bombin	Pablo Bombín	2021-05-03 00:42:34 UTC	2021-05-03 02:03:23 UTC	research	CC0	https://www.inaturalist.org/observations/76770553	https://inaturalist-open-data.s3.amazonaws.com/photos/125538535/medium.jpeg				1	0	false		Reserva Natural de Pilar, Dr. Manuel Argerich 10, B1629 Pilar, Provincia de Buenos Aires, Argentina	-34.4126543	-58.9159119	191				191			FALSE				Pilar	Buenos Aires	Argentina	Buenos Aires	Pilar	Ghost Bulimulus	Bulimulus bonariensis		Mollusca	831286	Bulimulus bonariensis		Eupulmonata	Stylommatophora	Orthalicoidea
76961885	2021/05/02 1:20 PM HST	2021-05-02	2021-05-02 23:20:00 UTC	Hawaii	854602	juanmago	Juan Matías	2021-05-03 15:16:51 UTC	2021-05-03 21:21:54 UTC	research	CC-BY-NC	https://www.inaturalist.org/observations/76961885	https://inaturalist-open-data.s3.amazonaws.com/photos/125854624/medium.jpeg				1	0	false		González Moreno, Provincia de Buenos Aires, Argentina	-35.5595768216	-63.3861024863	1674				1674			FALSE				Rivadavia	Buenos Aires	Argentina	Buenos Aires	Rivadavia	Ghost Bulimulus	Bulimulus bonariensis		Mollusca	831286	Bulimulus bonariensis		Eupulmonata	Stylommatophora	Orthalicoidea
77045253	2021/05/01 11:14 AM -0300	2021-05-01	2021-05-01 14:14:00 UTC	Buenos Aires	1205836	elbeltrocco	Eduardo Luis Beltrocco	2021-05-03 19:32:05 UTC	2021-05-03 21:24:45 UTC	research	CC-BY-NC	https://www.inaturalist.org/observations/77045253	https://inaturalist-open-data.s3.amazonaws.com/photos/125992891/medium.jpeg				2	0	false		Santo Tomé, Santa Fe, Argentina	-31.6689970365	-60.7536013348	4				4			FALSE				La Capital	Santa Fe	Argentina	Santa Fe	La Capital	Ghost Bulimulus	Bulimulus bonariensis		Mollusca	831286	Bulimulus bonariensis		Eupulmonata	Stylommatophora	Orthalicoidea
77130124	2021-05-03 8:02:19 PM GMT-03:00	2021-05-03	2021-05-03 23:02:19 UTC	Brasilia	3640164	luchila	Lucila Boasso	2021-05-03 23:53:23 UTC	2023-07-08 03:47:21 UTC	research	CC-BY-NC	https://www.inaturalist.org/observations/77130124	https://inaturalist-open-data.s3.amazonaws.com/photos/126129434/medium.jpeg				1	0	false	2	Córdoba Y Solis, Santo Tomé, Santa Fe, Argentina	-31.6650264131	-60.7680094242	13				13			FALSE	gps	gps		La Capital	Santa Fe	Argentina	Santa Fe	La Capital	Ghost Bulimulus	Bulimulus bonariensis		Mollusca	831286	Bulimulus bonariensis		Eupulmonata	Stylommatophora	Orthalicoidea
77186708	2021/05/02 4:34 PM HST	2021-05-02	2021-05-03 02:34:00 UTC	Hawaii	854602	juanmago	Juan Matías	2021-05-04 03:16:05 UTC	2021-05-05 15:59:38 UTC	research	CC-BY-NC	https://www.inaturalist.org/observations/77186708	https://inaturalist-open-data.s3.amazonaws.com/photos/126217416/medium.jpeg				1	0	false		González Moreno, Provincia de Buenos Aires, Argentina	-35.5547971225	-63.3692269071	210				210			FALSE				Rivadavia	Buenos Aires	Argentina	Buenos Aires	Rivadavia	Ghost Bulimulus	Bulimulus bonariensis		Mollusca	831286	Bulimulus bonariensis		Eupulmonata	Stylommatophora	Orthalicoidea
77544569	2021/05/01 4:32 PM -0400	2021-05-01	2021-05-01 20:32:00 UTC	Santiago	2821748	oscar_galli_merino		2021-05-06 02:04:42 UTC	2021-10-08 23:37:03 UTC	research	CC-BY	https://www.inaturalist.org/observations/77544569	https://inaturalist-open-data.s3.amazonaws.com/photos/126821154/medium.jpeg				1	0	false		San Cosme, Corrientes, Argentina	-27.4522348809	-58.6610202735	8				8			FALSE				San Cosme	Corrientes	Argentina	Corrientes	San Cosme	Ghost Bulimulus	Bulimulus bonariensis		Mollusca	831286	Bulimulus bonariensis		Eupulmonata	Stylommatophora	Orthalicoidea
77629128	2021/05/01 3:18 PM -0400	2021-05-01	2021-05-01 19:18:00 UTC	Santiago	3225167	laurabm2020	Lauu	2021-05-06 17:20:12 UTC	2022-04-26 20:14:48 UTC	research	CC-BY	https://www.inaturalist.org/observations/77629128	https://inaturalist-open-data.s3.amazonaws.com/photos/126973501/medium.jpeg				2	0	false		Rivadavia, Provincia de Buenos Aires, Argentina	-35.5098754927	-62.9725866116	31				31			FALSE				Rivadavia	Buenos Aires	Argentina	Buenos Aires	Rivadavia	Bulimulus bonariensis	Bulimulus bonariensis		Mollusca	831286	Bulimulus bonariensis		Eupulmonata	Stylommatophora	Orthalicoidea
77814269	2021/05/02 12:43 PM -0300	2021-05-02	2021-05-02 15:43:00 UTC	Buenos Aires	930841	michelledelaloye	Michelle Delaloye	2021-05-07 22:32:25 UTC	2021-07-31 20:28:16 UTC	research	CC-BY-NC	https://www.inaturalist.org/observations/77814269	https://inaturalist-open-data.s3.amazonaws.com/photos/127284178/medium.jpeg				2	0	false		La Plata, Provincia de Buenos Aires, Argentina	-34.9093701255	-57.9274300362	4				4			FALSE				La Plata	Buenos Aires	Argentina	Buenos Aires	La Plata	Bulimulus bonariensis	Bulimulus bonariensis		Mollusca	831286	Bulimulus bonariensis		Eupulmonata	Stylommatophora	Orthalicoidea
77976202	2021-05-05	2021-05-05		UTC	2785593	mabel33	Mabel Valdez	2021-05-08 22:47:04 UTC	2022-05-03 01:01:09 UTC	research		https://www.inaturalist.org/observations/77976202	https://static.inaturalist.org/photos/127560234/medium.jpeg				2	0	false	2	San Miguel de Tucumán	-26.8082752542	-65.217590332	7406				7406			FALSE	gps	gps		Capital	Tucumán	Argentina	Tucumán	Capital	Bulimulus bonariensis	Bulimulus bonariensis		Mollusca	831286	Bulimulus bonariensis		Eupulmonata	Stylommatophora	Orthalicoidea
78524563	2021/05/02 10:48 AM -0300	2021-05-02	2021-05-02 13:48:00 UTC	Buenos Aires	144	trekman	Gustavo Fernando Durán	2021-05-13 00:38:55 UTC	2021-05-13 16:07:29 UTC	research	CC-BY-NC-SA	https://www.inaturalist.org/observations/78524563	https://inaturalist-open-data.s3.amazonaws.com/photos/128513618/medium.jpeg				1	0	false		San Jeronimo Nte., Santa Fe, Argentina	-31.550868676	-61.0677071481	1934				1934			FALSE				Las Colonias	Santa Fe	Argentina	Santa Fe	Las Colonias	Ghost Bulimulus	Bulimulus bonariensis		Mollusca	831286	Bulimulus bonariensis		Eupulmonata	Stylommatophora	Orthalicoidea
78615917	2021-05-13 16:46:44	2021-05-13	2021-05-13 19:46:44 UTC	Buenos Aires	3574162	siempreverde		2021-05-13 19:47:35 UTC	2021-05-17 02:11:59 UTC	research	CC-BY-NC	https://www.inaturalist.org/observations/78615917	https://inaturalist-open-data.s3.amazonaws.com/photos/128679523/medium.jpeg				1	0	false	2	Paraná, Entre Ríos, Argentina	-31.779447	-60.486359								FALSE	gps	gps		Paraná	Entre Ríos	Argentina	Entre Ríos	Paraná	Bulimulus bonariensis	Bulimulus bonariensis		Mollusca	831286	Bulimulus bonariensis		Eupulmonata	Stylommatophora	Orthalicoidea
79111024	2021-05-15 12:03:18	2021-05-15	2021-05-15 15:03:18 UTC	Buenos Aires	3574162	siempreverde		2021-05-17 03:51:06 UTC	2021-05-17 23:56:55 UTC	research	CC-BY-NC	https://www.inaturalist.org/observations/79111024	https://inaturalist-open-data.s3.amazonaws.com/photos/129544070/medium.jpeg				1	0	false	2	Paraná, Entre Ríos, Argentina	-31.7786739722	-60.4853779722								FALSE	gps	gps		Paraná	Entre Ríos	Argentina	Entre Ríos	Paraná	Bulimulus bonariensis	Bulimulus bonariensis		Mollusca	831286	Bulimulus bonariensis		Eupulmonata	Stylommatophora	Orthalicoidea
79797844	2021/05/22 11:25 AM -0400	2021-05-22	2021-05-22 15:25:00 UTC	Santiago	4441144	escuela239santarita		2021-05-22 16:16:47 UTC	2021-07-04 18:32:22 UTC	research	CC-BY-NC	https://www.inaturalist.org/observations/79797844	https://inaturalist-open-data.s3.amazonaws.com/photos/130727535/medium.jpg				1	0	false		25 de Mayo, Misiones, Argentina	-27.5473190747	-54.7500547701	122				122			FALSE				Veinticinco de Mayo	Misiones	Argentina	Misiones	Veinticinco de Mayo	Bulimulus bonariensis	Bulimulus bonariensis		Mollusca	831286	Bulimulus bonariensis		Eupulmonata	Stylommatophora	Orthalicoidea
80972277	2021/05/08 10:56 AM -0300	2021-05-08	2021-05-08 13:56:00 UTC	Buenos Aires	1182839	giramone	Guille Ivan Spajic	2021-05-31 00:37:25 UTC	2021-07-15 05:02:16 UTC	research	CC-BY-NC	https://www.inaturalist.org/observations/80972277	https://inaturalist-open-data.s3.amazonaws.com/photos/132759725/medium.jpeg				1	0	false		RECS	-34.6081059	-58.3509217	1439				1439			FALSE				Distrito Federal	Ciudad de Buenos Aires	Argentina	Ciudad de Buenos Aires	Distrito Federal	Ghost Bulimulus	Bulimulus bonariensis		Mollusca	831286	Bulimulus bonariensis		Eupulmonata	Stylommatophora	Orthalicoidea
81029471	2021/01/06 10:29 AM -0300	2021-01-06	2021-01-06 13:29:00 UTC	Buenos Aires	1454648	r-a-p	RAP	2021-05-31 14:04:25 UTC	2021-09-14 21:36:08 UTC	research	CC-BY-NC	https://www.inaturalist.org/observations/81029471	https://static.inaturalist.org/photos/132861158/medium.jpg				1	0	false		Lago Lugano, Buenos Aires, Argentina	-34.6811316	-58.44516	356				356			FALSE				Distrito Federal	Ciudad de Buenos Aires	Argentina	Ciudad de Buenos Aires	Distrito Federal	Bulimulus bonariensis	Bulimulus bonariensis		Mollusca	831286	Bulimulus bonariensis		Eupulmonata	Stylommatophora	Orthalicoidea
84368532	2021/06/21 11:04 AM -0300	2021-06-21	2021-06-21 14:04:00 UTC	Buenos Aires	893121	martin_arregui	Martin Arregui	2021-06-24 23:58:45 UTC	2022-05-02 20:46:38 UTC	research	CC-BY-NC	https://www.inaturalist.org/observations/84368532	https://inaturalist-open-data.s3.amazonaws.com/photos/138655530/medium.jpeg				2	0	false		Ensenada, Provincia de Buenos Aires, Argentina	-34.8069477666	-58.0399207709	31				31			FALSE				Ensenada	Buenos Aires	Argentina	Buenos Aires	Ensenada	Bulimulus bonariensis	Bulimulus bonariensis		Mollusca	831286	Bulimulus bonariensis		Eupulmonata	Stylommatophora	Orthalicoidea
84419080	2021/06/16 1:42 PM -0300	2021-06-16	2021-06-16 16:42:00 UTC	Buenos Aires	1458503	lorenazapata	Lorena Zapata	2021-06-25 13:22:47 UTC	2023-01-06 19:02:21 UTC	research	CC-BY-NC	https://www.inaturalist.org/observations/84419080	https://inaturalist-open-data.s3.amazonaws.com/photos/138748622/medium.jpg				1	0	false		Reserva Ecológica Lago Lugano, CABA, Argentina	-34.6834022448	-58.4439647322	37				37			FALSE				Distrito Federal	Ciudad de Buenos Aires	Argentina	Ciudad de Buenos Aires	Distrito Federal	Ghost Bulimulus	Bulimulus bonariensis		Mollusca	831286	Bulimulus bonariensis		Eupulmonata	Stylommatophora	Orthalicoidea
84855389	2021/05/17 9:34 AM -0300	2021-05-17	2021-05-17 12:34:00 UTC	Buenos Aires	3663500	andrea_janin		2021-06-28 15:13:41 UTC	2021-08-31 20:40:12 UTC	research	CC-BY	https://www.inaturalist.org/observations/84855389	https://inaturalist-open-data.s3.amazonaws.com/photos/139517500/medium.jpeg				1	0	false		Resistencia, Chaco, Argentina	-27.4518622	-58.9855547	6521				6521			FALSE				San Fernando	Chaco	Argentina	Chaco	San Fernando	Bulimulus bonariensis	Bulimulus bonariensis		Mollusca	831286	Bulimulus bonariensis		Eupulmonata	Stylommatophora	Orthalicoidea
85840560	2021/07/03 3:23 PM -0300	2021-07-03	2021-07-03 18:23:00 UTC	Buenos Aires	1205836	elbeltrocco	Eduardo Luis Beltrocco	2021-07-05 23:02:35 UTC	2021-12-14 01:41:47 UTC	research	CC-BY-NC	https://www.inaturalist.org/observations/85840560	https://inaturalist-open-data.s3.amazonaws.com/photos/141301515/medium.jpeg				2	0	false		La Capital, Santa Fe, Argentina	-31.637264778	-60.6737387835								FALSE				La Capital	Santa Fe	Argentina	Santa Fe	La Capital	Ghost Bulimulus	Bulimulus bonariensis		Mollusca	831286	Bulimulus bonariensis		Eupulmonata	Stylommatophora	Orthalicoidea
86347458	2021-07-09 20:20:00	2021-07-09	2021-07-09 23:20:00 UTC	Buenos Aires	1075963	enzo_ferreyra	Enzo Edgardo Ferreyra	2021-07-10 00:21:01 UTC	2021-09-03 21:21:47 UTC	research	CC-BY-NC	https://www.inaturalist.org/observations/86347458	https://static.inaturalist.org/photos/142234760/medium.jpeg				1	0	false	2	Yapeyú, Corrientes, Argentina	-29.4645056552	-56.815706715	12				12			FALSE	gps	gps		San Martín	Corrientes	Argentina	Corrientes	San Martín	Ghost Bulimulus	Bulimulus bonariensis		Mollusca	831286	Bulimulus bonariensis		Eupulmonata	Stylommatophora	Orthalicoidea
86808075	2021/07/10 8:13 PM -0400	2021-07-10	2021-07-11 00:13:00 UTC	Santiago	2479819	el-naturalista	El Naturalista	2021-07-13 02:30:43 UTC	2022-01-08 07:04:30 UTC	research	CC-BY-NC	https://www.inaturalist.org/observations/86808075	https://inaturalist-open-data.s3.amazonaws.com/photos/143071526/medium.jpeg			Varias conchillas de ejemplares muertos en zona de caldenes, especialmente en torno a estos, algunas pocas con periostraco (también habían conchillas de P. patagonicus y S. meridionalis).	1	0	false		Bahía Blanca, Provincia de Buenos Aires, Argentina	-38.6894362787	-62.3526095135	61				61			FALSE				Bahía Blanca	Buenos Aires	Argentina	Buenos Aires	Bahía Blanca	Ghost Bulimulus	Bulimulus bonariensis		Mollusca	831286	Bulimulus bonariensis		Eupulmonata	Stylommatophora	Orthalicoidea
86892491	2021/06/24 2:42 PM -0300	2021-06-24	2021-06-24 17:42:00 UTC	Buenos Aires	2481121	bahianoayala	Bahiano Ayala	2021-07-13 19:27:39 UTC	2022-08-03 19:03:42 UTC	research	CC-BY	https://www.inaturalist.org/observations/86892491	https://inaturalist-open-data.s3.amazonaws.com/photos/143222802/medium.jpg				1	0	false		Longchamps, Provincia de Buenos Aires, Argentina	-34.8621869472	-58.4137235934	4				4			FALSE				Almirante Brown	Buenos Aires	Argentina	Buenos Aires	Almirante Brown	Ghost Bulimulus	Bulimulus bonariensis		Mollusca	831286	Bulimulus bonariensis		Eupulmonata	Stylommatophora	Orthalicoidea
86898599	2021/07/08 2:27 PM -0300	2021-07-08	2021-07-08 17:27:00 UTC	Buenos Aires	2481121	bahianoayala	Bahiano Ayala	2021-07-13 20:16:44 UTC	2022-08-03 19:03:42 UTC	research	CC-BY	https://www.inaturalist.org/observations/86898599	https://inaturalist-open-data.s3.amazonaws.com/photos/143232429/medium.jpg				2	0	false		Longchamps, Provincia de Buenos Aires, Argentina	-34.8603959068	-58.4146706294	2				2			FALSE				Almirante Brown	Buenos Aires	Argentina	Buenos Aires	Almirante Brown	Ghost Bulimulus	Bulimulus bonariensis		Mollusca	831286	Bulimulus bonariensis		Eupulmonata	Stylommatophora	Orthalicoidea
88554786	2011/04/17 10:01 AM -0300	2011-04-17	2011-04-17 13:01:00 UTC	Buenos Aires	1742792	diegoeseolivera	DiegoEseO	2021-07-25 15:42:13 UTC	2021-09-13 22:10:01 UTC	research	CC-BY-NC	https://www.inaturalist.org/observations/88554786	https://inaturalist-open-data.s3.amazonaws.com/photos/146119830/medium.jpeg				1	0	false		Ramallo, Provincia de Buenos Aires, Argentina	-33.4452347	-60.055482	167				167			FALSE				Ramallo	Buenos Aires	Argentina	Buenos Aires	Ramallo	Ghost Bulimulus	Bulimulus bonariensis		Mollusca	831286	Bulimulus bonariensis		Eupulmonata	Stylommatophora	Orthalicoidea
89826303	2021-08-03 16:51:43	2021-08-03	2021-08-03 19:51:43 UTC	Buenos Aires	1075963	enzo_ferreyra	Enzo Edgardo Ferreyra	2021-08-03 20:50:08 UTC	2021-08-04 19:38:16 UTC	research	CC-BY-NC	https://www.inaturalist.org/observations/89826303	https://static.inaturalist.org/photos/148377301/medium.jpeg				1	0	false	2	San Martín, Corrientes, Argentina	-29.4634723611	-56.8133811944								FALSE	gps	gps		San Martín	Corrientes	Argentina	Corrientes	San Martín	Ghost Bulimulus	Bulimulus bonariensis		Mollusca	831286	Bulimulus bonariensis		Eupulmonata	Stylommatophora	Orthalicoidea
89995559	2021-07-25 08:53:52	2021-07-25	2021-07-25 11:53:52 UTC	Buenos Aires	1447711	robertgodoy	Roberto Godoy	2021-08-05 04:44:03 UTC	2021-09-28 01:00:29 UTC	research		https://www.inaturalist.org/observations/89995559	https://inaturalist-open-data.s3.amazonaws.com/photos/148677561/medium.jpeg				1	0	false	2	Rosario del Tala, Entre Ríos, Argentina	-32.3114116557	-59.1393017024	8				8			FALSE	gps	gps		Tala	Entre Ríos	Argentina	Entre Ríos	Tala	Ghost Bulimulus	Bulimulus bonariensis		Mollusca	831286	Bulimulus bonariensis		Eupulmonata	Stylommatophora	Orthalicoidea
90022480	2021/08/03 1:15 PM -0300	2021-08-03	2021-08-03 16:15:00 UTC	Buenos Aires	1111470	leoleiva	Leonardo Adrián LEIVA	2021-08-05 13:11:57 UTC	2021-10-05 16:00:50 UTC	research	CC-BY-NC	https://www.inaturalist.org/observations/90022480	https://inaturalist-open-data.s3.amazonaws.com/photos/148725024/medium.jpg				2	0	false		La Capital, Santa Fe, Argentina	-31.73106575	-60.8620490833								FALSE				La Capital	Santa Fe	Argentina	Santa Fe	La Capital	Ghost Bulimulus	Bulimulus bonariensis		Mollusca	831286	Bulimulus bonariensis		Eupulmonata	Stylommatophora	Orthalicoidea
90617170	2021-07-13 14:12:11	2021-07-13	2021-07-13 17:12:11 UTC	Buenos Aires	3663500	andrea_janin		2021-08-10 03:09:28 UTC	2021-09-30 13:33:15 UTC	research	CC-BY	https://www.inaturalist.org/observations/90617170	https://inaturalist-open-data.s3.amazonaws.com/photos/149785381/medium.jpeg				1	0	false	2	Resistencia, Chaco, Argentina	-27.4516510611	-58.9855547994	6526				6526			FALSE	gps	gps		San Fernando	Chaco	Argentina	Chaco	San Fernando	Ghost Bulimulus	Bulimulus bonariensis		Mollusca	831286	Bulimulus bonariensis		Eupulmonata	Stylommatophora	Orthalicoidea
92572618	2010/11/18 4:51 PM -0300	2010-11-18	2010-11-18 18:51:00 UTC	Brasilia	1514402	hhulsberg	Hugo Hulsberg	2021-08-26 14:34:08 UTC	2021-10-04 19:08:32 UTC	research	CC-BY	https://www.inaturalist.org/observations/92572618	https://inaturalist-open-data.s3.amazonaws.com/photos/153298167/medium.jpeg				1	0	false		Alto Los Cardales, Provincia de Buenos Aires, Argentina	-34.3101804378	-58.9929312803	244				244			FALSE				Campana	Buenos Aires	Argentina	Buenos Aires	Campana	Ghost Bulimulus	Bulimulus bonariensis		Mollusca	831286	Bulimulus bonariensis		Eupulmonata	Stylommatophora	Orthalicoidea
92572692	2007/01/13 3:47 PM -0300	2007-01-13	2007-01-13 17:47:00 UTC	Brasilia	1514402	hhulsberg	Hugo Hulsberg	2021-08-26 14:34:53 UTC	2021-10-04 19:08:32 UTC	research	CC-BY	https://www.inaturalist.org/observations/92572692	https://inaturalist-open-data.s3.amazonaws.com/photos/153298449/medium.jpeg				1	0	false		Acassuso, Provincia de Buenos Aires, Argentina	-34.4684895237	-58.4952173031	122				122			FALSE				San Isidro	Buenos Aires	Argentina	Buenos Aires	San Isidro	Ghost Bulimulus	Bulimulus bonariensis		Mollusca	831286	Bulimulus bonariensis		Eupulmonata	Stylommatophora	Orthalicoidea
92572782	2013/01/27 9:29 AM -0300	2013-01-27	2013-01-27 11:29:00 UTC	Brasilia	1514402	hhulsberg	Hugo Hulsberg	2021-08-26 14:35:56 UTC	2021-10-04 19:08:32 UTC	research	CC-BY	https://www.inaturalist.org/observations/92572782	https://inaturalist-open-data.s3.amazonaws.com/photos/153298600/medium.jpg				1	0	false		Gral Villegas, Provincia de Buenos Aires, Argentina	-35.0964788912	-62.9579766781	977				977			FALSE				General Villegas	Buenos Aires	Argentina	Buenos Aires	General Villegas	Ghost Bulimulus	Bulimulus bonariensis		Mollusca	831286	Bulimulus bonariensis		Eupulmonata	Stylommatophora	Orthalicoidea
92572871	2009/12/25 1:44 PM -0300	2009-12-25	2009-12-25 15:44:00 UTC	Brasilia	1514402	hhulsberg	Hugo Hulsberg	2021-08-26 14:36:42 UTC	2021-10-04 19:08:32 UTC	research	CC-BY	https://www.inaturalist.org/observations/92572871	https://inaturalist-open-data.s3.amazonaws.com/photos/153298765/medium.jpeg				1	0	false		Pirané, Formosa, Argentina	-25.6436796832	-59.1410397923	1953				1953			FALSE				Pirané	Formosa	Argentina	Formosa	Pirané	Ghost Bulimulus	Bulimulus bonariensis		Mollusca	831286	Bulimulus bonariensis		Eupulmonata	Stylommatophora	Orthalicoidea
92572915	2011/10/10 10:15 PM -0300	2011-10-10	2011-10-11 01:15:00 UTC	Brasilia	1514402	hhulsberg	Hugo Hulsberg	2021-08-26 14:37:16 UTC	2021-10-04 19:08:32 UTC	research	CC-BY	https://www.inaturalist.org/observations/92572915	https://inaturalist-open-data.s3.amazonaws.com/photos/153298897/medium.jpg				1	0	false		Gral Manuel Belgrano, Misiones, Argentina	-25.7254019573	-54.0602736303	1953				1953			FALSE				General Manuel Belgrano	Misiones	Argentina	Misiones	General Manuel Belgrano	Ghost Bulimulus	Bulimulus bonariensis		Mollusca	831286	Bulimulus bonariensis		Eupulmonata	Stylommatophora	Orthalicoidea
92573012	2013/02/10 2:45 PM -0300	2013-02-10	2013-02-10 16:45:00 UTC	Brasilia	1514402	hhulsberg	Hugo Hulsberg	2021-08-26 14:38:24 UTC	2023-12-03 19:28:46 UTC	research	CC-BY	https://www.inaturalist.org/observations/92573012	https://inaturalist-open-data.s3.amazonaws.com/photos/153298987/medium.jpg				2	0	false		Santo Tomé, Corrientes, Argentina	-28.248985059	-55.9817641295	977				977			FALSE				Santo Tomé	Corrientes	Argentina	Corrientes	Santo Tomé	Bulimulus bonariensis	Bulimulus bonariensis		Mollusca	831286	Bulimulus bonariensis		Eupulmonata	Stylommatophora	Orthalicoidea
92615131	2007/10/21 10:53 AM -0300	2007-10-21	2007-10-21 12:53:00 UTC	Brasilia	1514402	hhulsberg	Hugo Hulsberg	2021-08-26 22:12:27 UTC	2021-10-04 19:11:24 UTC	research	CC-BY	https://www.inaturalist.org/observations/92615131	https://inaturalist-open-data.s3.amazonaws.com/photos/153374296/medium.jpeg				1	0	false		Formosa, Argentina	-25.8840956231	-58.5813143389	1953				1953			FALSE				Formosa	Formosa	Argentina	Formosa	Formosa	Ghost Bulimulus	Bulimulus bonariensis		Mollusca	831286	Bulimulus bonariensis		Eupulmonata	Stylommatophora	Orthalicoidea
92615831	2021/02/24 3:09 PM -0300	2021-02-24	2021-02-24 18:09:00 UTC	Brasilia	1514402	hhulsberg	Hugo Hulsberg	2021-08-26 22:18:22 UTC	2021-10-04 19:08:32 UTC	research	CC-BY	https://www.inaturalist.org/observations/92615831	https://inaturalist-open-data.s3.amazonaws.com/photos/153375175/medium.jpg				1	0	false		Anta, Salta, Argentina	-24.1956064946	-63.9987566044	244				244			FALSE				Anta	Salta	Argentina	Salta	Anta	Ghost Bulimulus	Bulimulus bonariensis		Mollusca	831286	Bulimulus bonariensis		Eupulmonata	Stylommatophora	Orthalicoidea
92616908	2021/03/17 11:50 AM -0300	2021-03-17	2021-03-17 14:50:00 UTC	Brasilia	1514402	hhulsberg	Hugo Hulsberg	2021-08-26 22:31:01 UTC	2021-10-04 19:08:32 UTC	research	CC-BY	https://www.inaturalist.org/observations/92616908	https://inaturalist-open-data.s3.amazonaws.com/photos/153377269/medium.jpg				1	0	false		Juárez Celman, Córdoba, Argentina	-33.41350374	-63.257040383	31				31			FALSE				Juárez Celman	Córdoba	Argentina	Córdoba	Juárez Celman	Ghost Bulimulus	Bulimulus bonariensis		Mollusca	831286	Bulimulus bonariensis		Eupulmonata	Stylommatophora	Orthalicoidea
92617777	2012/08/18 9:35 PM -0400	2012-08-18	2012-08-19 01:35:00 UTC	Santiago	1514402	hhulsberg	Hugo Hulsberg	2021-08-26 22:41:57 UTC	2022-11-22 19:18:04 UTC	research	CC-BY	https://www.inaturalist.org/observations/92617777	https://inaturalist-open-data.s3.amazonaws.com/photos/153379293/medium.jpg				1	0	false		Candelaria, Misiones, Argentina	-27.4706301594	-55.7356864973	244				244			FALSE				Candelaria	Misiones	Argentina	Misiones	Candelaria	Ghost Bulimulus	Bulimulus bonariensis		Mollusca	831286	Bulimulus bonariensis		Eupulmonata	Stylommatophora	Orthalicoidea
93370186	2021/08/26 12:48 PM -0300	2021-08-26	2021-08-26 15:48:00 UTC	Buenos Aires	50445	nicoolejnik	Nicolas Olejnik	2021-09-02 15:33:45 UTC	2021-09-02 16:44:28 UTC	research	CC-BY-NC	https://www.inaturalist.org/observations/93370186	https://inaturalist-open-data.s3.amazonaws.com/photos/154743009/medium.jpeg				1	0	false		Esteban Echeverría, Provincia de Buenos Aires, Argentina	-34.7860522254	-58.512752034	108				108			FALSE				Esteban Echeverría	Buenos Aires	Argentina	Buenos Aires	Esteban Echeverría	Ghost Bulimulus	Bulimulus bonariensis		Mollusca	831286	Bulimulus bonariensis		Eupulmonata	Stylommatophora	Orthalicoidea
95576514	2021/09/18 10:31 AM -0300	2021-09-18	2021-09-18 13:31:00 UTC	Buenos Aires	110716	adrianbraidotti	Adrian Braidotti	2021-09-20 20:27:40 UTC	2021-09-22 02:09:44 UTC	research	CC-BY-NC	https://www.inaturalist.org/observations/95576514	https://inaturalist-open-data.s3.amazonaws.com/photos/158685675/medium.jpeg				3	0	false		Reserva Natural Parque termal, Chajarí, Entre Ríos, Argentina	-30.7405213613	-58.0127343528	122				122			FALSE				Federación	Entre Ríos	Argentina	Entre Ríos	Federación	Ghost Bulimulus	Bulimulus bonariensis		Mollusca	831286	Bulimulus bonariensis		Eupulmonata	Stylommatophora	Orthalicoidea
95879072	2017/12/28 11:08 AM -0300	2017-12-28	2017-12-28 14:08:00 UTC	Buenos Aires	1205836	elbeltrocco	Eduardo Luis Beltrocco	2021-09-23 18:27:56 UTC	2022-04-09 13:17:28 UTC	research	CC-BY-NC	https://www.inaturalist.org/observations/95879072	https://inaturalist-open-data.s3.amazonaws.com/photos/159222978/medium.jpeg				2	0	false		Sarmiento y Centenario, Santo Tome, Santa Fe	-31.6616575276	-60.7608092327	18				18			FALSE				La Capital	Santa Fe	Argentina	Santa Fe	La Capital	Bulimulus bonariensis	Bulimulus bonariensis		Mollusca	831286	Bulimulus bonariensis		Eupulmonata	Stylommatophora	Orthalicoidea
97704556	2021/10/09 11:12 AM -0300	2021-10-09	2021-10-09 14:12:00 UTC	Buenos Aires	1454648	r-a-p	RAP	2021-10-09 22:17:13 UTC	2021-10-09 23:56:09 UTC	research	CC-BY-NC	https://www.inaturalist.org/observations/97704556	https://static.inaturalist.org/photos/162531848/medium.jpg				1	0	false		Lago Lugano, Buenos Aires, Argentina	-34.6811316	-58.44516	356				356			FALSE				Distrito Federal	Ciudad de Buenos Aires	Argentina	Ciudad de Buenos Aires	Distrito Federal	Ghost Bulimulus	Bulimulus bonariensis		Mollusca	831286	Bulimulus bonariensis		Eupulmonata	Stylommatophora	Orthalicoidea
97837805	2021/10/09 11:04 AM -0300	2021-10-09	2021-10-09 14:04:00 UTC	Buenos Aires	1454648	r-a-p	RAP	2021-10-10 23:20:23 UTC	2021-10-12 22:14:04 UTC	research	CC-BY-NC	https://www.inaturalist.org/observations/97837805	https://static.inaturalist.org/photos/162776336/medium.jpg				1	0	false		Lago Lugano, Buenos Aires, Argentina	-34.6811316	-58.44516	356				356			FALSE				Distrito Federal	Ciudad de Buenos Aires	Argentina	Ciudad de Buenos Aires	Distrito Federal	Ghost Bulimulus	Bulimulus bonariensis		Mollusca	831286	Bulimulus bonariensis		Eupulmonata	Stylommatophora	Orthalicoidea
98003465	2021/10/11 4:56 PM HST	2021-10-11	2021-10-12 02:56:00 UTC	Hawaii	854602	juanmago	Juan Matías	2021-10-12 14:06:50 UTC	2021-10-13 18:51:56 UTC	research	CC-BY-NC	https://www.inaturalist.org/observations/98003465	https://inaturalist-open-data.s3.amazonaws.com/photos/163085819/medium.jpeg				1	0	false		González Moreno, Provincia de Buenos Aires, Argentina	-35.5557804335	-63.3703701682	31				31			FALSE				Rivadavia	Buenos Aires	Argentina	Buenos Aires	Rivadavia	Ghost Bulimulus	Bulimulus bonariensis		Mollusca	831286	Bulimulus bonariensis		Eupulmonata	Stylommatophora	Orthalicoidea
98917679	2021/10/21 10:36 AM -0300	2021-10-21	2021-10-21 13:36:00 UTC	Buenos Aires	1454648	r-a-p	RAP	2021-10-21 21:21:56 UTC	2021-10-22 18:18:35 UTC	research	CC-BY-NC	https://www.inaturalist.org/observations/98917679	https://static.inaturalist.org/photos/164794882/medium.jpg				1	0	false		Lago Lugano, Buenos Aires, Argentina	-34.6811316	-58.44516	356				356			FALSE				Distrito Federal	Ciudad de Buenos Aires	Argentina	Ciudad de Buenos Aires	Distrito Federal	Ghost Bulimulus	Bulimulus bonariensis		Mollusca	831286	Bulimulus bonariensis		Eupulmonata	Stylommatophora	Orthalicoidea
98989382	2021/10/17 10:09 AM -0300	2021-10-17	2021-10-17 13:09:00 UTC	Buenos Aires	966066	silviolamothe		2021-10-22 16:09:07 UTC	2021-10-22 18:14:09 UTC	research	CC-BY-NC	https://www.inaturalist.org/observations/98989382	https://inaturalist-open-data.s3.amazonaws.com/photos/164929191/medium.jpeg				1	0	false		Gral Villegas, Provincia de Buenos Aires, Argentina	-35.0453834051	-63.0430155386	488				488			FALSE				General Villegas	Buenos Aires	Argentina	Buenos Aires	General Villegas	Ghost Bulimulus	Bulimulus bonariensis		Mollusca	831286	Bulimulus bonariensis		Eupulmonata	Stylommatophora	Orthalicoidea
99207503	2021/10/23 3:06 PM UTC	2021-10-23	2021-10-23 15:06:00 UTC	UTC	2574389	florenciaansaldi	Florencia Ansaldi	2021-10-24 12:51:31 UTC	2023-07-08 06:43:07 UTC	research	CC-BY-NC	https://www.inaturalist.org/observations/99207503	https://inaturalist-open-data.s3.amazonaws.com/photos/165329624/medium.jpeg				2	0	false		Roque Sáenz Peña, S2000 Villa Gdor. Galvez, Santa Fe, Argentina	-33.0103428	-60.6245528	335				335			FALSE				Rosario	Santa Fe	Argentina	Santa Fe	Rosario	Ghost Bulimulus	Bulimulus bonariensis		Mollusca	831286	Bulimulus bonariensis		Eupulmonata	Stylommatophora	Orthalicoidea
99312049	2021/10/22 6:41 PM HST	2021-10-22	2021-10-23 04:41:00 UTC	Hawaii	854602	juanmago	Juan Matías	2021-10-25 04:49:08 UTC	2021-10-25 16:43:32 UTC	research	CC-BY-NC	https://www.inaturalist.org/observations/99312049	https://inaturalist-open-data.s3.amazonaws.com/photos/165526255/medium.jpeg				1	0	false		González Moreno, Provincia de Buenos Aires, Argentina	-35.5572677603	-63.3741450913	6				6			FALSE				Rivadavia	Buenos Aires	Argentina	Buenos Aires	Rivadavia	Ghost Bulimulus	Bulimulus bonariensis		Mollusca	831286	Bulimulus bonariensis		Eupulmonata	Stylommatophora	Orthalicoidea
99312054	2021/10/22 6:48 PM HST	2021-10-22	2021-10-23 04:48:00 UTC	Hawaii	854602	juanmago	Juan Matías	2021-10-25 04:49:09 UTC	2022-01-27 13:00:42 UTC	research	CC-BY-NC	https://www.inaturalist.org/observations/99312054	https://inaturalist-open-data.s3.amazonaws.com/photos/165526431/medium.jpeg				1	0	false		González Moreno, Provincia de Buenos Aires, Argentina	-35.5572459396	-63.3740324385	4				4			FALSE				Rivadavia	Buenos Aires	Argentina	Buenos Aires	Rivadavia	Ghost Bulimulus	Bulimulus bonariensis		Mollusca	831286	Bulimulus bonariensis		Eupulmonata	Stylommatophora	Orthalicoidea
99312060	2021/10/22 6:55 PM HST	2021-10-22	2021-10-23 04:55:00 UTC	Hawaii	854602	juanmago	Juan Matías	2021-10-25 04:49:11 UTC	2021-10-25 16:44:16 UTC	research	CC-BY-NC	https://www.inaturalist.org/observations/99312060	https://inaturalist-open-data.s3.amazonaws.com/photos/165527000/medium.jpeg				1	0	false		González Moreno, Provincia de Buenos Aires, Argentina	-35.5572197547	-63.3741236336	4				4			FALSE				Rivadavia	Buenos Aires	Argentina	Buenos Aires	Rivadavia	Ghost Bulimulus	Bulimulus bonariensis		Mollusca	831286	Bulimulus bonariensis		Eupulmonata	Stylommatophora	Orthalicoidea
99312062	2021/10/22 6:57 PM HST	2021-10-22	2021-10-23 04:57:00 UTC	Hawaii	854602	juanmago	Juan Matías	2021-10-25 04:49:12 UTC	2021-10-25 16:44:22 UTC	research	CC-BY-NC	https://www.inaturalist.org/observations/99312062	https://inaturalist-open-data.s3.amazonaws.com/photos/165527033/medium.jpeg				1	0	false		González Moreno, Provincia de Buenos Aires, Argentina	-35.5571957519	-63.3740217097	4				4			FALSE				Rivadavia	Buenos Aires	Argentina	Buenos Aires	Rivadavia	Ghost Bulimulus	Bulimulus bonariensis		Mollusca	831286	Bulimulus bonariensis		Eupulmonata	Stylommatophora	Orthalicoidea
99312064	2021/10/22 7:07 PM HST	2021-10-22	2021-10-23 05:07:00 UTC	Hawaii	854602	juanmago	Juan Matías	2021-10-25 04:49:13 UTC	2021-10-25 16:44:26 UTC	research	CC-BY-NC	https://www.inaturalist.org/observations/99312064	https://inaturalist-open-data.s3.amazonaws.com/photos/165528028/medium.jpeg				1	0	false		González Moreno, Provincia de Buenos Aires, Argentina	-35.5572873989	-63.3740607973	4				4			FALSE				Rivadavia	Buenos Aires	Argentina	Buenos Aires	Rivadavia	Ghost Bulimulus	Bulimulus bonariensis		Mollusca	831286	Bulimulus bonariensis		Eupulmonata	Stylommatophora	Orthalicoidea
99314217	2021/10/22 7:12 PM HST	2021-10-22	2021-10-23 05:12:00 UTC	Hawaii	854602	juanmago	Juan Matías	2021-10-25 05:20:30 UTC	2021-10-25 16:44:30 UTC	research	CC-BY-NC	https://www.inaturalist.org/observations/99314217	https://inaturalist-open-data.s3.amazonaws.com/photos/165531460/medium.jpeg				1	0	false		González Moreno, Provincia de Buenos Aires, Argentina	-35.5572205066	-63.3739200555	4				4			FALSE				Rivadavia	Buenos Aires	Argentina	Buenos Aires	Rivadavia	Ghost Bulimulus	Bulimulus bonariensis		Mollusca	831286	Bulimulus bonariensis		Eupulmonata	Stylommatophora	Orthalicoidea
99314228	2021/10/22 7:21 PM HST	2021-10-22	2021-10-23 05:21:00 UTC	Hawaii	854602	juanmago	Juan Matías	2021-10-25 05:20:33 UTC	2021-10-25 16:44:34 UTC	research	CC-BY-NC	https://www.inaturalist.org/observations/99314228	https://inaturalist-open-data.s3.amazonaws.com/photos/165531838/medium.jpeg				1	0	false		González Moreno, Provincia de Buenos Aires, Argentina	-35.5571463161	-63.3739978395	4				4			FALSE				Rivadavia	Buenos Aires	Argentina	Buenos Aires	Rivadavia	Ghost Bulimulus	Bulimulus bonariensis		Mollusca	831286	Bulimulus bonariensis		Eupulmonata	Stylommatophora	Orthalicoidea
99339185	2021/10/22 6:38 PM -0300	2021-10-22	2021-10-22 21:38:00 UTC	Buenos Aires	1205836	elbeltrocco	Eduardo Luis Beltrocco	2021-10-25 12:38:45 UTC	2021-10-26 16:10:49 UTC	research	CC-BY-NC	https://www.inaturalist.org/observations/99339185	https://inaturalist-open-data.s3.amazonaws.com/photos/165576707/medium.jpg				1	0	false		Sarmiento y Centenario, Santo Tome, Santa Fe	-31.6616575276	-60.7608092327	18				18			FALSE				La Capital	Santa Fe	Argentina	Santa Fe	La Capital	Ghost Bulimulus	Bulimulus bonariensis		Mollusca	831286	Bulimulus bonariensis		Eupulmonata	Stylommatophora	Orthalicoidea
99347437	2021/10/22 7:29 PM HST	2021-10-22	2021-10-23 05:29:00 UTC	Hawaii	854602	juanmago	Juan Matías	2021-10-25 14:18:56 UTC	2021-10-26 16:14:00 UTC	research	CC-BY-NC	https://www.inaturalist.org/observations/99347437	https://inaturalist-open-data.s3.amazonaws.com/photos/165589490/medium.jpeg				1	0	false		González Moreno, Provincia de Buenos Aires, Argentina	-35.5571816669	-63.3740232494	31				31			FALSE				Rivadavia	Buenos Aires	Argentina	Buenos Aires	Rivadavia	Ghost Bulimulus	Bulimulus bonariensis		Mollusca	831286	Bulimulus bonariensis		Eupulmonata	Stylommatophora	Orthalicoidea
99347438	2021/10/22 7:29 PM HST	2021-10-22	2021-10-23 05:29:00 UTC	Hawaii	854602	juanmago	Juan Matías	2021-10-25 14:18:56 UTC	2021-10-26 16:18:48 UTC	research	CC-BY-NC	https://www.inaturalist.org/observations/99347438	https://inaturalist-open-data.s3.amazonaws.com/photos/165589562/medium.jpeg				1	0	false		González Moreno, Provincia de Buenos Aires, Argentina	-35.5571791614	-63.3739239868	4				4			FALSE				Rivadavia	Buenos Aires	Argentina	Buenos Aires	Rivadavia	Ghost Bulimulus	Bulimulus bonariensis		Mollusca	831286	Bulimulus bonariensis		Eupulmonata	Stylommatophora	Orthalicoidea
99347446	2021/10/22 7:56 PM HST	2021-10-22	2021-10-23 05:56:00 UTC	Hawaii	854602	juanmago	Juan Matías	2021-10-25 14:19:00 UTC	2021-10-25 16:43:58 UTC	research	CC-BY-NC	https://www.inaturalist.org/observations/99347446	https://inaturalist-open-data.s3.amazonaws.com/photos/165589879/medium.jpeg				1	0	false		González Moreno, Provincia de Buenos Aires, Argentina	-35.5572729905	-63.3740312751	4				4			FALSE				Rivadavia	Buenos Aires	Argentina	Buenos Aires	Rivadavia	Ghost Bulimulus	Bulimulus bonariensis		Mollusca	831286	Bulimulus bonariensis		Eupulmonata	Stylommatophora	Orthalicoidea
99381128	2021/10/22 5:29 PM UTC	2021-10-22	2021-10-22 17:29:00 UTC	UTC	2492304	martinaarias	Martina Arias	2021-10-25 19:59:58 UTC	2021-10-26 16:48:25 UTC	research		https://www.inaturalist.org/observations/99381128	https://static.inaturalist.org/photos/165637855/medium.jpg				1	0	false		Unquillo, Córdoba, Argentina	-31.2180018381	-64.344116836	31				31			FALSE				Colón	Córdoba	Argentina	Córdoba	Colón	Bulimulus bonariensis	Bulimulus bonariensis		Mollusca	831286	Bulimulus bonariensis		Eupulmonata	Stylommatophora	Orthalicoidea
99417418	2021/10/23 10:03 AM -0300	2021-10-23	2021-10-23 13:03:00 UTC	Brasilia	3670694	graciela_gplp		2021-10-26 02:34:29 UTC	2021-10-26 22:19:52 UTC	research	CC-BY-NC	https://www.inaturalist.org/observations/99417418	https://inaturalist-open-data.s3.amazonaws.com/photos/165721340/medium.jpeg				2	0	false		Maracó, La Pampa, Argentina	-35.7271415862	-63.8323818244	244				244			FALSE				Maracó	La Pampa	Argentina	La Pampa	Maracó	Ghost Bulimulus	Bulimulus bonariensis		Mollusca	831286	Bulimulus bonariensis		Eupulmonata	Stylommatophora	Orthalicoidea
99512562	2021/10/22 11:18 AM -0300	2021-10-22	2021-10-22 14:18:00 UTC	Brasilia	3670694	graciela_gplp		2021-10-27 02:47:29 UTC	2022-01-27 02:52:53 UTC	research	CC-BY-NC	https://www.inaturalist.org/observations/99512562	https://inaturalist-open-data.s3.amazonaws.com/photos/165903840/medium.jpg				2	0	false		Maracó, La Pampa, Argentina	-35.6821509765	-63.6945111972	244				244			FALSE				Maracó	La Pampa	Argentina	La Pampa	Maracó	Ghost Bulimulus	Bulimulus bonariensis		Mollusca	831286	Bulimulus bonariensis		Eupulmonata	Stylommatophora	Orthalicoidea
100013639	Mon Nov 01 2021 09:42:44 GMT-0300 (GMT-3)	2021-11-01	2021-11-01 12:42:44 UTC	Buenos Aires	2551145	alfanova	Valentín Alfano	2021-11-01 21:37:52 UTC	2021-11-02 04:01:40 UTC	research	CC-BY-NC	https://www.inaturalist.org/observations/100013639	https://inaturalist-open-data.s3.amazonaws.com/photos/166867999/medium.jpg			@csarmmolina	1	0	false	3	Bahía Blanca, Bahía Blanca, Buenos Aires, AR	-38.69194667	-62.35651667	5				5			FALSE				Bahía Blanca	Buenos Aires	Argentina	Buenos Aires	Bahía Blanca	Bulimulus bonariensis	Bulimulus bonariensis		Mollusca	831286	Bulimulus bonariensis		Eupulmonata	Stylommatophora	Orthalicoidea
100138363	2021/10/24 11:01 AM -0300	2021-10-24	2021-10-24 14:01:00 UTC	Buenos Aires	1454648	r-a-p	RAP	2021-11-03 11:45:59 UTC	2021-11-03 18:15:45 UTC	research	CC-BY-NC	https://www.inaturalist.org/observations/100138363	https://static.inaturalist.org/photos/167093337/medium.jpg				1	0	false		Lago Lugano, Buenos Aires, Argentina	-34.6811316	-58.44516	356				356			FALSE				Distrito Federal	Ciudad de Buenos Aires	Argentina	Ciudad de Buenos Aires	Distrito Federal	Ghost Bulimulus	Bulimulus bonariensis		Mollusca	831286	Bulimulus bonariensis		Eupulmonata	Stylommatophora	Orthalicoidea
100179125	2021/11/03 6:08 PM -0300	2021-11-03	2021-11-03 21:08:00 UTC	Brasilia	3660407	txurruarin	Isaias Maximiliano Churruarin	2021-11-03 21:13:56 UTC	2021-11-04 17:27:29 UTC	research	CC-BY-NC	https://www.inaturalist.org/observations/100179125	https://inaturalist-open-data.s3.amazonaws.com/photos/167164479/medium.jpeg				1	0	false		Tostado, Santa Fe, Argentina	-29.2236357298	-61.7682564642	15				15			FALSE				Nueve de Julio	Santa Fe	Argentina	Santa Fe	Nueve de Julio	Ghost Bulimulus	Bulimulus bonariensis		Mollusca	831286	Bulimulus bonariensis		Eupulmonata	Stylommatophora	Orthalicoidea
100354111	2021/11/05 11:51 AM -0300	2021-11-05	2021-11-05 14:51:00 UTC	Buenos Aires	2447101	buddyfede	Federico	2021-11-05 23:30:39 UTC	2021-11-29 22:02:40 UTC	research	CC-BY-NC	https://www.inaturalist.org/observations/100354111	https://inaturalist-open-data.s3.amazonaws.com/photos/167479661/medium.jpeg				1	0	false		Pilar, Provincia de Buenos Aires, Argentina	-34.3987805556	-58.9104083333	3524				3524			FALSE				Pilar	Buenos Aires	Argentina	Buenos Aires	Pilar	Ghost Bulimulus	Bulimulus bonariensis		Mollusca	831286	Bulimulus bonariensis		Eupulmonata	Stylommatophora	Orthalicoidea
100518391	2021/11/06 12:56 PM -0300	2021-11-06	2021-11-06 15:56:00 UTC	Buenos Aires	1454648	r-a-p	RAP	2021-11-07 18:44:59 UTC	2021-11-08 17:37:34 UTC	research	CC-BY-NC	https://www.inaturalist.org/observations/100518391	https://static.inaturalist.org/photos/167777756/medium.jpg				1	0	false		Lago Lugano, Buenos Aires, Argentina	-34.6811316	-58.44516	356				356			FALSE				Distrito Federal	Ciudad de Buenos Aires	Argentina	Ciudad de Buenos Aires	Distrito Federal	Ghost Bulimulus	Bulimulus bonariensis		Mollusca	831286	Bulimulus bonariensis		Eupulmonata	Stylommatophora	Orthalicoidea
100902727	2021/11/11 12:10 PM UTC	2021-11-11	2021-11-11 12:10:00 UTC	UTC	2492304	martinaarias	Martina Arias	2021-11-12 03:13:55 UTC	2021-11-15 13:19:15 UTC	research		https://www.inaturalist.org/observations/100902727	https://static.inaturalist.org/photos/168459213/medium.jpg				1	0	false		Unquillo, Córdoba, Argentina	-31.2178561363	-64.3522410921	31				31			FALSE				Colón	Córdoba	Argentina	Córdoba	Colón	Ghost Bulimulus	Bulimulus bonariensis		Mollusca	831286	Bulimulus bonariensis		Eupulmonata	Stylommatophora	Orthalicoidea
101052444	2021/11/13 11:12 AM -0300	2021-11-13	2021-11-13 14:12:00 UTC	Buenos Aires	972932	ejnadal	Eduardo Nadal	2021-11-14 00:09:08 UTC	2021-11-15 10:27:29 UTC	research	CC-BY-NC	https://www.inaturalist.org/observations/101052444	https://inaturalist-open-data.s3.amazonaws.com/photos/168716580/medium.jpg				1	0	false		Castelar, Provincia de Buenos Aires, Argentina	-34.6709933333	-58.65288								FALSE				Morón	Buenos Aires	Argentina	Buenos Aires	Morón	Ghost Bulimulus	Bulimulus bonariensis		Mollusca	831286	Bulimulus bonariensis		Eupulmonata	Stylommatophora	Orthalicoidea
101281698	2021/11/06 12:56 PM -0300	2021-11-06	2021-11-06 15:56:00 UTC	Buenos Aires	1454648	r-a-p	RAP	2021-11-16 20:31:47 UTC	2021-11-17 16:31:13 UTC	research	CC-BY-NC	https://www.inaturalist.org/observations/101281698	https://static.inaturalist.org/photos/169129785/medium.jpg				2	0	false		Lago Lugano, Buenos Aires, Argentina	-34.6811316	-58.44516	356				356			FALSE				Distrito Federal	Ciudad de Buenos Aires	Argentina	Ciudad de Buenos Aires	Distrito Federal	Ghost Bulimulus	Bulimulus bonariensis		Mollusca	831286	Bulimulus bonariensis		Eupulmonata	Stylommatophora	Orthalicoidea
101392533	2021/11/17 9:37 AM -0300	2021-11-17	2021-11-17 12:37:00 UTC	Buenos Aires	1205836	elbeltrocco	Eduardo Luis Beltrocco	2021-11-18 11:08:15 UTC	2021-11-20 23:33:29 UTC	research	CC-BY-NC	https://www.inaturalist.org/observations/101392533	https://inaturalist-open-data.s3.amazonaws.com/photos/169326139/medium.jpeg				2	0	false		Santa Fe, Argentina	-31.6075443834	-60.7252113627	4				4			FALSE				La Capital	Santa Fe	Argentina	Santa Fe	La Capital	Ghost Bulimulus	Bulimulus bonariensis		Mollusca	831286	Bulimulus bonariensis		Eupulmonata	Stylommatophora	Orthalicoidea
101589650	2021/11/13 7:43 PM HST	2021-11-13	2021-11-14 05:43:00 UTC	Hawaii	854602	juanmago	Juan Matías	2021-11-21 03:35:49 UTC	2021-11-21 19:41:39 UTC	research	CC-BY-NC	https://www.inaturalist.org/observations/101589650	https://inaturalist-open-data.s3.amazonaws.com/photos/169674389/medium.jpeg				1	0	false		González Moreno, Provincia de Buenos Aires, Argentina	-35.5572604917	-63.3742168944	15				15			FALSE				Rivadavia	Buenos Aires	Argentina	Buenos Aires	Rivadavia	Ghost Bulimulus	Bulimulus bonariensis		Mollusca	831286	Bulimulus bonariensis		Eupulmonata	Stylommatophora	Orthalicoidea
101642504	2021/11/20 7:41 PM HST	2021-11-20	2021-11-21 05:41:00 UTC	Hawaii	854602	juanmago	Juan Matías	2021-11-21 19:18:27 UTC	2021-11-22 20:15:53 UTC	research	CC-BY-NC	https://www.inaturalist.org/observations/101642504	https://inaturalist-open-data.s3.amazonaws.com/photos/169763024/medium.jpeg				1	0	false		González Moreno, Provincia de Buenos Aires, Argentina	-35.5545950128	-63.3704595145	10				10			FALSE				Rivadavia	Buenos Aires	Argentina	Buenos Aires	Rivadavia	Ghost Bulimulus	Bulimulus bonariensis		Mollusca	831286	Bulimulus bonariensis		Eupulmonata	Stylommatophora	Orthalicoidea
101731183	2021/11/20 11:41 AM -0300	2021-11-20	2021-11-20 14:41:00 UTC	Buenos Aires	1509502	diego_t	Diego Trillo	2021-11-22 23:14:58 UTC	2021-11-23 20:36:32 UTC	research	CC-BY-NC	https://www.inaturalist.org/observations/101731183	https://inaturalist-open-data.s3.amazonaws.com/photos/169923553/medium.jpeg				2	0	false		Dock Sud, Provincia de Buenos Aires, Argentina	-34.6633388552	-58.3145581978	631				631			FALSE				Avellaneda	Buenos Aires	Argentina	Buenos Aires	Avellaneda	Ghost Bulimulus	Bulimulus bonariensis		Mollusca	831286	Bulimulus bonariensis		Eupulmonata	Stylommatophora	Orthalicoidea
102537818	2021-12-05 10:17:40	2021-12-05	2021-12-05 13:17:40 UTC	Buenos Aires	3225167	laurabm2020	Lauu	2021-12-05 16:11:49 UTC	2022-04-26 20:03:28 UTC	research	CC-BY	https://www.inaturalist.org/observations/102537818	https://inaturalist-open-data.s3.amazonaws.com/photos/171430090/medium.jpeg				1	0	false	2	Rivadavia, Provincia de Buenos Aires, Argentina	-35.5071102869	-62.9743191227	113				113			FALSE	gps	gps		Rivadavia	Buenos Aires	Argentina	Buenos Aires	Rivadavia	Ghost Bulimulus	Bulimulus bonariensis		Mollusca	831286	Bulimulus bonariensis		Eupulmonata	Stylommatophora	Orthalicoidea
102545480	2021/11/28 8:11 PM HST	2021-11-28	2021-11-29 06:11:00 UTC	Hawaii	854602	juanmago	Juan Matías	2021-12-05 17:59:36 UTC	2021-12-06 17:27:29 UTC	research	CC-BY-NC	https://www.inaturalist.org/observations/102545480	https://inaturalist-open-data.s3.amazonaws.com/photos/171443448/medium.jpeg				1	0	false		González Moreno, Provincia de Buenos Aires, Argentina	-35.55725216	-63.3739752732	4				4			FALSE				Rivadavia	Buenos Aires	Argentina	Buenos Aires	Rivadavia	Ghost Bulimulus	Bulimulus bonariensis		Mollusca	831286	Bulimulus bonariensis		Eupulmonata	Stylommatophora	Orthalicoidea
102612501	2021/12/02 11:40 AM -0300	2021-12-02	2021-12-02 14:40:00 UTC	Buenos Aires	1454648	r-a-p	RAP	2021-12-06 17:21:47 UTC	2021-12-06 18:50:31 UTC	research	CC-BY-NC	https://www.inaturalist.org/observations/102612501	https://static.inaturalist.org/photos/171570260/medium.jpg				1	0	false		Lago Lugano, Buenos Aires, Argentina	-34.6811316	-58.44516	356				356			FALSE				Distrito Federal	Ciudad de Buenos Aires	Argentina	Ciudad de Buenos Aires	Distrito Federal	Ghost Bulimulus	Bulimulus bonariensis		Mollusca	831286	Bulimulus bonariensis		Eupulmonata	Stylommatophora	Orthalicoidea
102793815	2021/12/08 12:55 AM UTC	2021-12-08	2021-12-08 00:55:00 UTC	UTC	2197647	nstor8	Néstor Trossero	2021-12-10 00:56:14 UTC	2021-12-10 19:35:29 UTC	research	CC0	https://www.inaturalist.org/observations/102793815	https://static.inaturalist.org/photos/171910358/medium.jpg			33 mm de longitud... me quedan dudas de la especie, demasiado grande para los bulimulus que se suelen ver en esta zona... pero no cuento con un rol más completo de otras especies...	1	0	false		Paraná, AR-ER, AR	-31.752181	-60.493239	225				225			FALSE				Paraná	Entre Ríos	Argentina	Entre Ríos	Paraná	Ghost Bulimulus	Bulimulus bonariensis		Mollusca	831286	Bulimulus bonariensis		Eupulmonata	Stylommatophora	Orthalicoidea
102867218	2021/12/02 3:15 PM -0300	2021-12-02	2021-12-02 18:15:00 UTC	Buenos Aires	1454648	r-a-p	RAP	2021-12-11 13:11:15 UTC	2021-12-12 14:37:06 UTC	research	CC-BY-NC	https://www.inaturalist.org/observations/102867218	https://static.inaturalist.org/photos/172047109/medium.jpg				1	0	false		Lago Lugano, Buenos Aires, Argentina	-34.6811316	-58.44516	356				356			FALSE				Distrito Federal	Ciudad de Buenos Aires	Argentina	Ciudad de Buenos Aires	Distrito Federal	Ghost Bulimulus	Bulimulus bonariensis		Mollusca	831286	Bulimulus bonariensis		Eupulmonata	Stylommatophora	Orthalicoidea
102907685	2021-12-12 00:26:04	2021-12-12	2021-12-12 03:26:04 UTC	Buenos Aires	2852440	caro_moro	caro	2021-12-12 03:31:11 UTC	2023-05-01 21:16:35 UTC	research	CC-BY-NC	https://www.inaturalist.org/observations/102907685	https://inaturalist-open-data.s3.amazonaws.com/photos/172122434/medium.jpeg				2	0	false	2	Arroyo Leyes, Santa Fe, Argentina	-31.5850495509	-60.5352054164	15				15			FALSE	gps	gps		La Capital	Santa Fe	Argentina	Santa Fe	La Capital	Bulimulus bonariensis	Bulimulus bonariensis		Mollusca	831286	Bulimulus bonariensis		Eupulmonata	Stylommatophora	Orthalicoidea
103124261	2021/12/14 7:52 PM HST	2021-12-14	2021-12-15 05:52:00 UTC	Hawaii	854602	juanmago	Juan Matías	2021-12-16 01:31:14 UTC	2021-12-16 19:44:49 UTC	research	CC-BY-NC	https://www.inaturalist.org/observations/103124261	https://inaturalist-open-data.s3.amazonaws.com/photos/172528178/medium.jpeg				1	0	false		González Moreno, Provincia de Buenos Aires, Argentina	-35.5573493909	-63.3739789093	8				8			FALSE				Rivadavia	Buenos Aires	Argentina	Buenos Aires	Rivadavia	Ghost Bulimulus	Bulimulus bonariensis		Mollusca	831286	Bulimulus bonariensis		Eupulmonata	Stylommatophora	Orthalicoidea
103124262	2021/12/14 7:54 PM HST	2021-12-14	2021-12-15 05:54:00 UTC	Hawaii	854602	juanmago	Juan Matías	2021-12-16 01:31:15 UTC	2021-12-16 19:45:26 UTC	research	CC-BY-NC	https://www.inaturalist.org/observations/103124262	https://inaturalist-open-data.s3.amazonaws.com/photos/172528211/medium.jpeg				1	0	false		González Moreno, Provincia de Buenos Aires, Argentina	-35.5573548461	-63.3738072269	4				4			FALSE				Rivadavia	Buenos Aires	Argentina	Buenos Aires	Rivadavia	Ghost Bulimulus	Bulimulus bonariensis		Mollusca	831286	Bulimulus bonariensis		Eupulmonata	Stylommatophora	Orthalicoidea
103199744	2021/12/16 7:27 PM HST	2021-12-16	2021-12-17 05:27:00 UTC	Hawaii	854602	juanmago	Juan Matías	2021-12-17 16:29:57 UTC	2021-12-20 21:01:16 UTC	research	CC-BY-NC	https://www.inaturalist.org/observations/103199744	https://inaturalist-open-data.s3.amazonaws.com/photos/172666935/medium.jpeg				2	0	false		González Moreno, Provincia de Buenos Aires, Argentina	-35.557143052	-63.373504304	4				4			FALSE				Rivadavia	Buenos Aires	Argentina	Buenos Aires	Rivadavia	Bulimulus bonariensis	Bulimulus bonariensis		Mollusca	831286	Bulimulus bonariensis		Eupulmonata	Stylommatophora	Orthalicoidea
103246956	2021-12-18	2021-12-18		UTC	5263008	alejandra536	Alejandra Rios	2021-12-18 13:00:04 UTC	2021-12-18 13:10:05 UTC	research		https://www.inaturalist.org/observations/103246956	https://static.inaturalist.org/photos/172753357/medium.jpeg				1	0	false	2	San Martín, Santa Fe, Argentina	-31.9838568889	-61.7674248806								FALSE				San Martín	Santa Fe	Argentina	Santa Fe	San Martín	Bulimulus bonariensis	Bulimulus bonariensis		Mollusca	831286	Bulimulus bonariensis		Eupulmonata	Stylommatophora	Orthalicoidea
103415892	2021/12/21 8:44 AM -0300	2021-12-21	2021-12-21 11:44:00 UTC	Brasilia	5270719	nico-17		2021-12-21 14:00:53 UTC	2021-12-23 17:11:37 UTC	research	CC-BY-NC	https://www.inaturalist.org/observations/103415892	https://inaturalist-open-data.s3.amazonaws.com/photos/173076052/medium.jpeg				2	0	false		Cuartel V, Provincia de Buenos Aires, Argentina	-34.5715701961	-58.8370214926	5998				5998			FALSE				Moreno	Buenos Aires	Argentina	Buenos Aires	Moreno	Ghost Bulimulus	Bulimulus bonariensis		Mollusca	831286	Bulimulus bonariensis		Eupulmonata	Stylommatophora	Orthalicoidea
103601234	2021/12/24 11:19 AM -03	2021-12-24	2021-12-24 14:19:00 UTC	Buenos Aires	144	trekman	Gustavo Fernando Durán	2021-12-24 21:23:02 UTC	2021-12-26 17:31:10 UTC	research	CC-BY-NC-SA	https://www.inaturalist.org/observations/103601234	https://inaturalist-open-data.s3.amazonaws.com/photos/173431992/medium.jpg				2	0	false		La Capital, Santa Fe, Argentina	-31.636577858	-60.6734226115	194				194			FALSE				La Capital	Santa Fe	Argentina	Santa Fe	La Capital	Bulimulus bonariensis	Bulimulus bonariensis		Mollusca	831286	Bulimulus bonariensis		Eupulmonata	Stylommatophora	Orthalicoidea
103730819	2021/12/26 10:56 AM UTC	2021-12-26	2021-12-26 10:56:00 UTC	UTC	2492304	martinaarias	Martina Arias	2021-12-27 03:10:41 UTC	2021-12-27 18:57:33 UTC	research		https://www.inaturalist.org/observations/103730819	https://static.inaturalist.org/photos/173677237/medium.jpg				1	0	false		Colón, Córdoba, Argentina	-31.322585114	-64.3296614293	2				2			FALSE				Colón	Córdoba	Argentina	Córdoba	Colón	Ghost Bulimulus	Bulimulus bonariensis		Mollusca	831286	Bulimulus bonariensis		Eupulmonata	Stylommatophora	Orthalicoidea
103933173	2021/12/28 8:12 PM HST	2021-12-28	2021-12-29 06:12:00 UTC	Hawaii	854602	juanmago	Juan Matías	2021-12-30 03:44:36 UTC	2021-12-30 16:30:09 UTC	research	CC-BY-NC	https://www.inaturalist.org/observations/103933173	https://inaturalist-open-data.s3.amazonaws.com/photos/174076600/medium.jpeg				2	0	false		González Moreno, Provincia de Buenos Aires, Argentina	-35.5571066938	-63.3735171838	8				8			FALSE				Rivadavia	Buenos Aires	Argentina	Buenos Aires	Rivadavia	Bulimulus bonariensis	Bulimulus bonariensis		Mollusca	831286	Bulimulus bonariensis		Eupulmonata	Stylommatophora	Orthalicoidea
104128209	2022-01-01 16:58:11	2022-01-01	2022-01-01 19:58:11 UTC	Buenos Aires	4274059	lolo42		2022-01-01 20:34:16 UTC	2022-01-03 22:54:04 UTC	research	CC-BY-NC	https://www.inaturalist.org/observations/104128209	https://inaturalist-open-data.s3.amazonaws.com/photos/174443013/medium.jpeg				2	0	false	2	Villa Elisa, Entre Ríos, Argentina	-32.1659806109	-58.4005750716	9				9			FALSE	gps	gps		Colón	Entre Ríos	Argentina	Entre Ríos	Colón	Ghost Bulimulus	Bulimulus bonariensis		Mollusca	831286	Bulimulus bonariensis		Eupulmonata	Stylommatophora	Orthalicoidea
104240781	2022-01-02 09:50:42	2022-01-02	2022-01-02 12:50:42 UTC	Buenos Aires	1401709	nahue	Nahuel	2022-01-03 02:57:28 UTC	2022-01-03 12:52:02 UTC	research	CC-BY-NC	https://www.inaturalist.org/observations/104240781	https://inaturalist-open-data.s3.amazonaws.com/photos/174640262/medium.jpeg				1	0	false	2	Belgrano, CABA, Argentina	-34.5371927203	-58.4438528493	152				152			FALSE	gps	gps		Distrito Federal	Ciudad de Buenos Aires	Argentina	Ciudad de Buenos Aires	Distrito Federal	Ghost Bulimulus	Bulimulus bonariensis		Mollusca	831286	Bulimulus bonariensis		Eupulmonata	Stylommatophora	Orthalicoidea
104315916	2022/01/02 10:04 AM -0300	2022-01-02	2022-01-02 13:04:00 UTC	Brasilia	2223515	isisagostina	Isis Agostina Ibañez	2022-01-04 01:58:33 UTC	2022-01-04 18:11:59 UTC	research	CC-BY-NC	https://www.inaturalist.org/observations/104315916	https://inaturalist-open-data.s3.amazonaws.com/photos/174762264/medium.jpeg				2	0	false		Belgrano, CABA, Argentina	-34.5383614061	-58.4431919313	194				194			FALSE				Distrito Federal	Ciudad de Buenos Aires	Argentina	Ciudad de Buenos Aires	Distrito Federal	Ghost Bulimulus	Bulimulus bonariensis		Mollusca	831286	Bulimulus bonariensis		Eupulmonata	Stylommatophora	Orthalicoidea
104374016	2022/01/03 5:51 PM -0300	2022-01-03	2022-01-03 20:51:00 UTC	Brasilia	2479819	el-naturalista	El Naturalista	2022-01-04 23:49:34 UTC	2022-01-06 12:52:24 UTC	research	CC-BY-NC	https://www.inaturalist.org/observations/104374016	https://inaturalist-open-data.s3.amazonaws.com/photos/174875033/medium.jpg			Zona médano relictual, Trenque Lauquen.	2	0	false		Trenque Lauquen, Provincia de Buenos Aires, Argentina	-36.0007080562	-62.7470457024	15				15			FALSE				Trenque Lauquen	Buenos Aires	Argentina	Buenos Aires	Trenque Lauquen	Ghost Bulimulus	Bulimulus bonariensis		Mollusca	831286	Bulimulus bonariensis		Eupulmonata	Stylommatophora	Orthalicoidea
104437043	2022/01/02 1:48 PM -0300	2022-01-02	2022-01-02 16:48:00 UTC	Buenos Aires	1478388	typophyllum	Holger Braun	2022-01-06 01:05:34 UTC	2022-03-28 15:01:47 UTC	research	CC-BY-NC	https://www.inaturalist.org/observations/104437043	https://inaturalist-open-data.s3.amazonaws.com/photos/174994556/medium.jpeg				1	0	false		Pereyra, Provincia de Buenos Aires, Argentina	-34.8169938231	-58.0981995093	101				101			FALSE				Berazategui	Buenos Aires	Argentina	Buenos Aires	Berazategui	Ghost Bulimulus	Bulimulus bonariensis		Mollusca	831286	Bulimulus bonariensis		Eupulmonata	Stylommatophora	Orthalicoidea
104542831	2022/01/02 6:57 AM -0300	2022-01-02	2022-01-02 09:57:00 UTC	Buenos Aires	144	trekman	Gustavo Fernando Durán	2022-01-07 22:57:07 UTC	2022-01-08 01:39:36 UTC	research	CC-BY-NC-SA	https://www.inaturalist.org/observations/104542831	https://inaturalist-open-data.s3.amazonaws.com/photos/175192928/medium.jpeg				1	0	false		Las Colonias, Santa Fe, Argentina	-31.5387510959	-61.0659255132	629				629			FALSE				Las Colonias	Santa Fe	Argentina	Santa Fe	Las Colonias	Bulimulus bonariensis	Bulimulus bonariensis		Mollusca	831286	Bulimulus bonariensis		Eupulmonata	Stylommatophora	Orthalicoidea
104557750	2016/07/17 3:33 PM -0400	2016-07-17	2016-07-17 19:33:00 UTC	Santiago	3344965	luchoperalta	Luciano Peralta	2022-01-08 04:28:10 UTC	2022-01-08 20:58:17 UTC	research	CC-BY-NC	https://www.inaturalist.org/observations/104557750	https://inaturalist-open-data.s3.amazonaws.com/photos/175223557/medium.jpg				1	0	false		Bernal, Provincia de Buenos Aires, Argentina	-34.6906390909	-58.258395195	76				76			FALSE				Quilmes	Buenos Aires	Argentina	Buenos Aires	Quilmes	Ghost Bulimulus	Bulimulus bonariensis		Mollusca	831286	Bulimulus bonariensis		Eupulmonata	Stylommatophora	Orthalicoidea
104601066	2016/10/29 1:31 PM -0300	2016-10-29	2016-10-29 15:31:00 UTC	Brasilia	3344965	luchoperalta	Luciano Peralta	2022-01-08 21:55:07 UTC	2022-01-10 03:35:31 UTC	research	CC-BY-NC	https://www.inaturalist.org/observations/104601066	https://inaturalist-open-data.s3.amazonaws.com/photos/175304924/medium.jpg				2	0	false		Bahía Blanca, Provincia de Buenos Aires, Argentina	-38.6390418298	-62.2895415959	211				211			FALSE				Bahía Blanca	Buenos Aires	Argentina	Buenos Aires	Bahía Blanca	Ghost Bulimulus	Bulimulus bonariensis		Mollusca	831286	Bulimulus bonariensis		Eupulmonata	Stylommatophora	Orthalicoidea
104983618	2022/01/08 9:40 AM HST	2022-01-08	2022-01-08 19:40:00 UTC	Hawaii	854602	juanmago	Juan Matías	2022-01-15 18:57:39 UTC	2022-01-15 19:06:33 UTC	research	CC-BY-NC	https://www.inaturalist.org/observations/104983618	https://inaturalist-open-data.s3.amazonaws.com/photos/176037497/medium.jpeg				1	0	false		González Moreno, Provincia de Buenos Aires, Argentina	-35.5525505037	-63.3765642889	4				4			FALSE				Rivadavia	Buenos Aires	Argentina	Buenos Aires	Rivadavia	Ghost Bulimulus	Bulimulus bonariensis		Mollusca	831286	Bulimulus bonariensis		Eupulmonata	Stylommatophora	Orthalicoidea
105174076	2022/01/13 12:22 PM -0300	2022-01-13	2022-01-13 15:22:00 UTC	Buenos Aires	50445	nicoolejnik	Nicolas Olejnik	2022-01-18 21:19:52 UTC	2022-01-19 00:39:22 UTC	research	CC-BY-NC	https://www.inaturalist.org/observations/105174076	https://inaturalist-open-data.s3.amazonaws.com/photos/176405804/medium.jpeg				2	0	false		Cafayate, Salta, Argentina	-26.0932406095	-66.0152790927	54				54			FALSE				Cafayate	Salta	Argentina	Salta	Cafayate	Ghost Bulimulus	Bulimulus bonariensis		Mollusca	831286	Bulimulus bonariensis		Eupulmonata	Stylommatophora	Orthalicoidea
105210558	2022/01/08 12:27 PM -0300	2022-01-08	2022-01-08 15:27:00 UTC	Buenos Aires	50445	nicoolejnik	Nicolas Olejnik	2022-01-19 14:35:23 UTC	2022-02-24 17:14:11 UTC	research	CC-BY-NC	https://www.inaturalist.org/observations/105210558	https://inaturalist-open-data.s3.amazonaws.com/photos/176475743/medium.jpeg				1	0	false		Salta, Argentina	-24.786931282	-65.3927872935	52				52			FALSE				Capital	Salta	Argentina	Salta	Capital	Ghost Bulimulus	Bulimulus bonariensis		Mollusca	831286	Bulimulus bonariensis		Eupulmonata	Stylommatophora	Orthalicoidea
105358396	2015/05/01 9:11 AM -03	2015-05-01	2015-05-01 12:11:00 UTC	Buenos Aires	1198642	rdsage		2022-01-22 12:22:51 UTC	2022-02-25 02:54:34 UTC	research	CC-BY-NC	https://www.inaturalist.org/observations/105358396	https://inaturalist-open-data.s3.amazonaws.com/photos/176759950/medium.jpg				1	0	false		Tafí Viejo Department, Tucumán, Argentina	-26.607768	-65.175764	200				200			FALSE				Tafí Viejo	Tucumán	Argentina	Tucumán	Tafí Viejo	Ghost Bulimulus	Bulimulus bonariensis		Mollusca	831286	Bulimulus bonariensis		Eupulmonata	Stylommatophora	Orthalicoidea
105395958	2022/01/01 10:06 PM -0300	2022-01-01	2022-01-02 01:06:00 UTC	Buenos Aires	2430991	mariazeta	María Zeta	2022-01-22 23:29:49 UTC	2022-04-26 23:20:20 UTC	research	CC-BY-SA	https://www.inaturalist.org/observations/105395958	https://inaturalist-open-data.s3.amazonaws.com/photos/176829171/medium.jpeg				2	0	false		San Cristóbal, Santa Fe, Argentina	-30.1852597793	-61.1895974372	15				15			FALSE				San Cristóbal	Santa Fe	Argentina	Santa Fe	San Cristóbal	Bulimulus bonariensis	Bulimulus bonariensis		Mollusca	831286	Bulimulus bonariensis		Eupulmonata	Stylommatophora	Orthalicoidea
105399922	2022/01/22 4:09 PM HST	2022-01-22	2022-01-23 02:09:00 UTC	Hawaii	854602	juanmago	Juan Matías	2022-01-23 00:28:56 UTC	2022-02-25 02:02:54 UTC	research	CC-BY-NC	https://www.inaturalist.org/observations/105399922	https://inaturalist-open-data.s3.amazonaws.com/photos/176836752/medium.jpeg				1	0	false		González Moreno, Provincia de Buenos Aires, Argentina	-35.5515538197	-63.3835516754	4				4			FALSE				Rivadavia	Buenos Aires	Argentina	Buenos Aires	Rivadavia	Ghost Bulimulus	Bulimulus bonariensis		Mollusca	831286	Bulimulus bonariensis		Eupulmonata	Stylommatophora	Orthalicoidea
105438760	2021/11/02 9:33 PM -0300	2021-11-02	2021-11-03 00:33:00 UTC	Buenos Aires	966066	silviolamothe		2022-01-23 16:54:06 UTC	2022-01-24 12:18:38 UTC	research	CC-BY-NC	https://www.inaturalist.org/observations/105438760	https://inaturalist-open-data.s3.amazonaws.com/photos/176911663/medium.jpeg				1	0	false		Gral Villegas, Provincia de Buenos Aires, Argentina	-35.0104235064	-62.9987269033	488				488			FALSE				General Villegas	Buenos Aires	Argentina	Buenos Aires	General Villegas	Ghost Bulimulus	Bulimulus bonariensis		Mollusca	831286	Bulimulus bonariensis		Eupulmonata	Stylommatophora	Orthalicoidea
105503139	2022/01/24 12:41 PM -0300	2022-01-24	2022-01-24 15:41:00 UTC	Brasilia	5070568	tuckylozano		2022-01-24 15:50:31 UTC	2022-02-25 02:06:14 UTC	research	CC-BY-NC	https://www.inaturalist.org/observations/105503139	https://inaturalist-open-data.s3.amazonaws.com/photos/177033323/medium.jpg			dav	2	0	false		General Villegas, AR-BA, AR	-35.0366775928	-63.0099161635	4				4			FALSE				General Villegas	Buenos Aires	Argentina	Buenos Aires	General Villegas	Ghost Bulimulus	Bulimulus bonariensis		Mollusca	831286	Bulimulus bonariensis		Eupulmonata	Stylommatophora	Orthalicoidea
105554405	Tue Jan 25 2022 10:23:27 GMT-0300 (GMT-3)	2022-01-25	2022-01-25 13:23:27 UTC	Brasilia	2844043	sabrina_rnd	Sabrina Rendón	2022-01-25 14:27:20 UTC	2022-01-25 15:06:30 UTC	research		https://www.inaturalist.org/observations/105554405	https://static.inaturalist.org/photos/177132042/medium.jpg				1	0	false	3	Facultad de Ciencias Veterinarias - UBA, Buenos Aires, Ciudad Autónoma de Buenos Aires, AR	-34.594495	-58.4848883333	24				24			FALSE				Distrito Federal	Ciudad de Buenos Aires	Argentina	Ciudad de Buenos Aires	Distrito Federal	Ghost Bulimulus	Bulimulus bonariensis		Mollusca	831286	Bulimulus bonariensis		Eupulmonata	Stylommatophora	Orthalicoidea
106121417	2022-02-02 15:50:21	2022-02-02	2022-02-02 18:50:21 UTC	Buenos Aires	2526835	marielgall	Mariel Gall	2022-02-04 14:46:45 UTC	2022-02-25 02:28:35 UTC	research	CC-BY-NC	https://www.inaturalist.org/observations/106121417	https://inaturalist-open-data.s3.amazonaws.com/photos/178212342/medium.jpeg				1	0	false	2	Colón, Córdoba, Argentina	-31.1944916667	-64.3676								FALSE	gps	gps		Colón	Córdoba	Argentina	Córdoba	Colón	Ghost Bulimulus	Bulimulus bonariensis		Mollusca	831286	Bulimulus bonariensis		Eupulmonata	Stylommatophora	Orthalicoidea
106142363	2022-02-04 19:18:38	2022-02-04	2022-02-04 22:18:38 UTC	Buenos Aires	670350	lauravb	Laura Veronica Bianchi	2022-02-04 22:56:38 UTC	2022-04-11 19:32:47 UTC	research	CC-BY-SA	https://www.inaturalist.org/observations/106142363	https://inaturalist-open-data.s3.amazonaws.com/photos/178252219/medium.jpeg				2	0	false	2	Polvaredas, Provincia de Buenos Aires, Argentina	-35.5959964108	-59.5027085021	9				9			FALSE	gps	gps		Saladillo	Buenos Aires	Argentina	Buenos Aires	Saladillo	Ghost Bulimulus	Bulimulus bonariensis		Mollusca	831286	Bulimulus bonariensis		Eupulmonata	Stylommatophora	Orthalicoidea
106151121	2022/02/04 6:10 PM -0300	2022-02-04	2022-02-04 21:10:00 UTC	Brasilia	2523944	juanmanuelatencio	Geografiaargentina	2022-02-05 02:22:36 UTC	2022-05-21 18:57:23 UTC	research	CC-BY	https://www.inaturalist.org/observations/106151121	https://inaturalist-open-data.s3.amazonaws.com/photos/178267975/medium.jpg			Caparazón vacío encontrado en el jardín de una chacra.																											Mollusca	831286	Bulimulus bonariensis		Eupulmonata	Stylommatophora	Orthalicoidea
106372669	2022-02-07 19:57:23	2022-02-07	2022-02-07 22:57:23 UTC	Buenos Aires	3459281	turkeeeto	Lucas Cheme Arriaga	2022-02-08 12:11:49 UTC	2022-04-11 19:31:22 UTC	research		https://www.inaturalist.org/observations/106372669	https://static.inaturalist.org/photos/178680540/medium.jpeg				2	0	false	2	Toay, La Pampa, Argentina	-36.6799988352	-64.3741210923	39				39			FALSE	gps	gps		Toay	La Pampa	Argentina	La Pampa	Toay	Ghost Bulimulus	Bulimulus bonariensis		Mollusca	831286	Bulimulus bonariensis		Eupulmonata	Stylommatophora	Orthalicoidea
106706131	2022-02-13 18:35:51	2022-02-13	2022-02-13 21:35:51 UTC	Buenos Aires	2331254	preli	Pablo Preliasco	2022-02-13 22:12:50 UTC	2022-02-14 17:04:15 UTC	research	CC-BY-NC	https://www.inaturalist.org/observations/106706131	https://inaturalist-open-data.s3.amazonaws.com/photos/179310205/medium.jpeg				1	0	false	2	Avenida Bernabe Marquez 5880-6200, Billinghurst, Provincia de Buenos Aires, Argentina	-34.566743	-58.588844								FALSE	gps	gps		General San Martín	Buenos Aires	Argentina	Buenos Aires	General San Martín	Ghost Bulimulus	Bulimulus bonariensis		Mollusca	831286	Bulimulus bonariensis		Eupulmonata	Stylommatophora	Orthalicoidea
107501529	2022/02/24 8:02 AM -0300	2022-02-24	2022-02-24 11:02:00 UTC	Buenos Aires	1205836	elbeltrocco	Eduardo Luis Beltrocco	2022-02-26 20:22:29 UTC	2022-02-28 02:37:03 UTC	research	CC-BY-NC	https://www.inaturalist.org/observations/107501529	https://inaturalist-open-data.s3.amazonaws.com/photos/180816027/medium.jpg				2	0	false		Sarmiento y Centenario, Santo Tome, Santa Fe	-31.6616575276	-60.7608092327	18				18			FALSE				La Capital	Santa Fe	Argentina	Santa Fe	La Capital	Bulimulus bonariensis	Bulimulus bonariensis		Mollusca	831286	Bulimulus bonariensis		Eupulmonata	Stylommatophora	Orthalicoidea
107595068	2022/02/27 12:26 PM -0300	2022-02-27	2022-02-27 15:26:00 UTC	Buenos Aires	144	trekman	Gustavo Fernando Durán	2022-02-27 23:13:56 UTC	2022-02-28 19:18:23 UTC	research	CC-BY-NC-SA	https://www.inaturalist.org/observations/107595068	https://inaturalist-open-data.s3.amazonaws.com/photos/180991478/medium.jpg				1	0	false		San Jeronimo Nte., Santa Fe, Argentina	-31.548722	-61.0720949722								FALSE				Las Colonias	Santa Fe	Argentina	Santa Fe	Las Colonias	Ghost Bulimulus	Bulimulus bonariensis		Mollusca	831286	Bulimulus bonariensis		Eupulmonata	Stylommatophora	Orthalicoidea
107778060	2022-03-02 07:15:28	2022-03-02	2022-03-02 10:15:28 UTC	Buenos Aires	5290740	anto44	Antonela Boggian	2022-03-02 19:19:43 UTC	2023-07-08 07:36:28 UTC	research	CC-BY-NC	https://www.inaturalist.org/observations/107778060	https://inaturalist-open-data.s3.amazonaws.com/photos/181337598/medium.jpeg				1	0	false	2	San Mart�n Alberdi J Garay S J, Coronda, Santa Fe, S2240 Coronda, Santa Fe, Argentina	-31.9777532047	-60.9204816073	190				190			FALSE	gps	gps		San Jerónimo	Santa Fe	Argentina	Santa Fe	San Jerónimo	Ghost Bulimulus	Bulimulus bonariensis		Mollusca	831286	Bulimulus bonariensis		Eupulmonata	Stylommatophora	Orthalicoidea
107801619	2013/03/08 6:22 PM -0300	2013-03-08	2013-03-08 21:22:00 UTC	Brasilia	3344965	luchoperalta	Luciano Peralta	2022-03-03 02:37:36 UTC	2022-03-03 18:23:50 UTC	research	CC-BY-NC	https://www.inaturalist.org/observations/107801619	https://inaturalist-open-data.s3.amazonaws.com/photos/181380944/medium.jpg				1	0	false		Centro, Córdoba, Argentina	-31.417739637	-64.1887757396	6283				6283			FALSE				Capital	Córdoba	Argentina	Córdoba	Capital	Ghost Bulimulus	Bulimulus bonariensis		Mollusca	831286	Bulimulus bonariensis		Eupulmonata	Stylommatophora	Orthalicoidea
108022705	2022-03-05 09:26:09	2022-03-05	2022-03-05 12:26:09 UTC	Buenos Aires	2741741	astridnautas		2022-03-06 13:39:01 UTC	2022-03-08 17:34:20 UTC	research	CC-BY-NC	https://www.inaturalist.org/observations/108022705	https://inaturalist-open-data.s3.amazonaws.com/photos/181793795/medium.jpeg				2	0	false	2	El Palomar, Provincia de Buenos Aires, Argentina	-34.624591	-58.616419								FALSE	gps	gps		Morón	Buenos Aires	Argentina	Buenos Aires	Morón	Ghost Bulimulus	Bulimulus bonariensis		Mollusca	831286	Bulimulus bonariensis		Eupulmonata	Stylommatophora	Orthalicoidea
108299515	2022-03-09 15:36:11	2022-03-09	2022-03-09 18:36:11 UTC	Buenos Aires	3225167	laurabm2020	Lauu	2022-03-10 13:26:33 UTC	2022-03-10 14:36:07 UTC	research	CC-BY	https://www.inaturalist.org/observations/108299515	https://inaturalist-open-data.s3.amazonaws.com/photos/182315145/medium.jpeg				1	0	false	2	Rivadavia, AR-BA, AR	-35.4863838158	-62.9804556817	383				383			FALSE	gps	gps		Rivadavia	Buenos Aires	Argentina	Buenos Aires	Rivadavia	Bulimulus bonariensis	Bulimulus bonariensis		Mollusca	831286	Bulimulus bonariensis		Eupulmonata	Stylommatophora	Orthalicoidea
108586825	2022-03-11 19:21:35	2022-03-11	2022-03-11 22:21:35 UTC	Buenos Aires	1368185	skay		2022-03-14 14:30:10 UTC	2022-03-16 14:54:02 UTC	research	CC-BY-NC	https://www.inaturalist.org/observations/108586825	https://inaturalist-open-data.s3.amazonaws.com/photos/182854006/medium.jpeg				2	0	false	2	Oliva, Córdoba, Argentina	-32.041411	-63.571802								FALSE	gps	gps		Tercero Arriba	Córdoba	Argentina	Córdoba	Tercero Arriba	Ghost Bulimulus	Bulimulus bonariensis		Mollusca	831286	Bulimulus bonariensis		Eupulmonata	Stylommatophora	Orthalicoidea
108648742	2022/02/19 8:55 AM -0300	2022-02-19	2022-02-19 11:55:00 UTC	Buenos Aires	2481121	bahianoayala	Bahiano Ayala	2022-03-15 11:53:42 UTC	2022-08-03 19:03:42 UTC	research	CC-BY	https://www.inaturalist.org/observations/108648742	https://inaturalist-open-data.s3.amazonaws.com/photos/182971717/medium.jpg				2	0	false		El Palomar, Provincia de Buenos Aires, Argentina	-34.6255306844	-58.6154927665	8				8			FALSE				Morón	Buenos Aires	Argentina	Buenos Aires	Morón	Bulimulus bonariensis	Bulimulus bonariensis		Mollusca	831286	Bulimulus bonariensis		Eupulmonata	Stylommatophora	Orthalicoidea
108649931	2022-03-12 11:49:15	2022-03-12	2022-03-12 14:49:15 UTC	Buenos Aires	146947	mbernini	Mauro Bernini	2022-03-15 12:30:03 UTC	2022-03-16 17:20:26 UTC	research	CC-BY-NC-SA	https://www.inaturalist.org/observations/108649931	https://inaturalist-open-data.s3.amazonaws.com/photos/182974037/medium.jpeg				2	0	false	2	Reserva Ecológica Ciudad Universitaria-Costanera Norte, CABA, Argentina	-34.538274812	-58.4424805641	169				169			FALSE	gps	gps		Distrito Federal	Ciudad de Buenos Aires	Argentina	Ciudad de Buenos Aires	Distrito Federal	Bulimulus bonariensis	Bulimulus bonariensis		Mollusca	831286	Bulimulus bonariensis		Eupulmonata	Stylommatophora	Orthalicoidea
108672421	2022/03/13 12:20 PM -0300	2022-03-13	2022-03-13 15:20:00 UTC	Buenos Aires	1454648	r-a-p	RAP	2022-03-15 19:15:22 UTC	2022-03-16 17:22:19 UTC	research	CC-BY-NC	https://www.inaturalist.org/observations/108672421	https://static.inaturalist.org/photos/183014471/medium.jpg				1	0	false		Dock Sud, Buenos Aires, Argentina	-34.664275815	-58.3156228065	457				457			FALSE				Avellaneda	Buenos Aires	Argentina	Buenos Aires	Avellaneda	Ghost Bulimulus	Bulimulus bonariensis		Mollusca	831286	Bulimulus bonariensis		Eupulmonata	Stylommatophora	Orthalicoidea
108722126	2022/03/08 9:14 AM -0300	2022-03-08	2022-03-08 12:14:00 UTC	Brasilia	4234570	silvia_mallet	Silvia Mallet	2022-03-16 13:02:15 UTC	2022-04-11 19:17:22 UTC	research	CC-BY-NC	https://www.inaturalist.org/observations/108722126	https://inaturalist-open-data.s3.amazonaws.com/photos/183109464/medium.jpeg				2	0	false		Gral. Pico, La Pampa, Argentina	-35.6593239	-63.7577887	4571				4571			FALSE				Maracó	La Pampa	Argentina	La Pampa	Maracó	Ghost Bulimulus	Bulimulus bonariensis		Mollusca	831286	Bulimulus bonariensis		Eupulmonata	Stylommatophora	Orthalicoidea
108733616	Sat Mar 12 2022 11:50:30 GMT-0300 (GMT-3)	2022-03-12	2022-03-12 14:50:30 UTC	Buenos Aires	142253	carancho	Leonel Roget	2022-03-16 16:45:13 UTC	2022-03-18 21:42:43 UTC	research	CC-BY	https://www.inaturalist.org/observations/108733616	https://inaturalist-open-data.s3.amazonaws.com/photos/183130185/medium.jpg				1	0	false	3	Parque de la Memoria, Buenos Aires, Ciudad Autónoma de Buenos Aires, AR	-34.5376138135	-58.443711972	97				97			FALSE				Distrito Federal	Ciudad de Buenos Aires	Argentina	Ciudad de Buenos Aires	Distrito Federal	Ghost Bulimulus	Bulimulus bonariensis		Mollusca	831286	Bulimulus bonariensis		Eupulmonata	Stylommatophora	Orthalicoidea
108772789	2022-03-12 11:17:48	2022-03-12	2022-03-12 14:17:48 UTC	Buenos Aires	1401709	nahue	Nahuel	2022-03-17 02:22:07 UTC	2022-03-18 19:29:39 UTC	research	CC-BY-NC	https://www.inaturalist.org/observations/108772789	https://inaturalist-open-data.s3.amazonaws.com/photos/183204304/medium.jpeg				2	0	false	2	Reserva Ecológica Vicente López	-34.4916788374	-58.4794970602	264				264			FALSE	gps	gps		San Isidro	Buenos Aires	Argentina	Buenos Aires	San Isidro	Bulimulus bonariensis	Bulimulus bonariensis		Mollusca	831286	Bulimulus bonariensis		Eupulmonata	Stylommatophora	Orthalicoidea
108795056	2022/02/26 9:57 AM -0300	2022-02-26	2022-02-26 12:57:00 UTC	Buenos Aires	1454648	r-a-p	RAP	2022-03-17 12:45:12 UTC	2022-03-18 19:42:19 UTC	research	CC-BY-NC	https://www.inaturalist.org/observations/108795056	https://static.inaturalist.org/photos/183246447/medium.jpg				2	0	false		Lago Lugano, Buenos Aires, Argentina	-34.6811316	-58.44516	356				356			FALSE				Distrito Federal	Ciudad de Buenos Aires	Argentina	Ciudad de Buenos Aires	Distrito Federal	Ghost Bulimulus	Bulimulus bonariensis		Mollusca	831286	Bulimulus bonariensis		Eupulmonata	Stylommatophora	Orthalicoidea
108905213	2022/03/13 9:32 AM -0300	2022-03-13	2022-03-13 12:32:00 UTC	Buenos Aires	144	trekman	Gustavo Fernando Durán	2022-03-18 22:39:28 UTC	2022-03-21 05:46:14 UTC	research	CC-BY-NC-SA	https://www.inaturalist.org/observations/108905213	https://inaturalist-open-data.s3.amazonaws.com/photos/183446305/medium.jpeg				1	0	false		San Jeronimo Nte., Santa Fe, Argentina	-31.5508493944	-61.0677623322	1253				1253			FALSE				Las Colonias	Santa Fe	Argentina	Santa Fe	Las Colonias	Ghost Bulimulus	Bulimulus bonariensis		Mollusca	831286	Bulimulus bonariensis		Eupulmonata	Stylommatophora	Orthalicoidea
109099360	2022/03/20 5:11 PM -0300	2022-03-20	2022-03-20 20:11:00 UTC	Buenos Aires	144	trekman	Gustavo Fernando Durán	2022-03-20 23:53:21 UTC	2022-03-21 05:46:18 UTC	research	CC-BY-NC-SA	https://www.inaturalist.org/observations/109099360	https://inaturalist-open-data.s3.amazonaws.com/photos/183811609/medium.jpg				1	0	false		Las Colonias, Santa Fe, Argentina	-31.551351	-61.0857079722								FALSE				Las Colonias	Santa Fe	Argentina	Santa Fe	Las Colonias	Ghost Bulimulus	Bulimulus bonariensis		Mollusca	831286	Bulimulus bonariensis		Eupulmonata	Stylommatophora	Orthalicoidea
109164335	2022-03-18 11:56:48	2022-03-18	2022-03-18 14:56:48 UTC	Buenos Aires	5290740	anto44	Antonela Boggian	2022-03-21 19:06:47 UTC	2023-07-08 07:52:13 UTC	research	CC-BY-NC	https://www.inaturalist.org/observations/109164335	https://inaturalist-open-data.s3.amazonaws.com/photos/183936883/medium.jpeg				1	0	false	2	Coronda, Santa Fe, Argentina	-31.9788245304	-60.9160314873	181				181			FALSE	gps	gps		San Jerónimo	Santa Fe	Argentina	Santa Fe	San Jerónimo	Ghost Bulimulus	Bulimulus bonariensis		Mollusca	831286	Bulimulus bonariensis		Eupulmonata	Stylommatophora	Orthalicoidea
109285979	Wed Mar 23 2022 08:00:00 GMT-0300 (GMT-3)	2022-03-23	2022-03-23 11:00:00 UTC	Brasilia	723035	juanitoescamilla	Juanito Escamilla	2022-03-23 14:23:10 UTC	2023-03-18 20:05:47 UTC	research	CC-BY	https://www.inaturalist.org/observations/109285979	https://inaturalist-open-data.s3.amazonaws.com/photos/184164396/medium.jpg				1	0	false	3	Gobernador Manuel I. Lagraña, Corrientes, Corrientes, AR	-27.4626166667	-58.8258283333	35				35			FALSE				Capital	Corrientes	Argentina	Corrientes	Capital	Ghost Bulimulus	Bulimulus bonariensis		Mollusca	831286	Bulimulus bonariensis		Eupulmonata	Stylommatophora	Orthalicoidea
109305537	2022-03-22 17:21:52	2022-03-22	2022-03-22 20:21:52 UTC	Buenos Aires	1075963	enzo_ferreyra	Enzo Edgardo Ferreyra	2022-03-23 18:28:46 UTC	2022-03-24 17:18:35 UTC	research	CC-BY-NC	https://www.inaturalist.org/observations/109305537	https://static.inaturalist.org/photos/184202014/medium.jpeg				2	0	false	2	Yapeyú, Corrientes, Argentina	-29.4639965599	-56.8161083758	7				7			FALSE	gps	gps		San Martín	Corrientes	Argentina	Corrientes	San Martín	阿根廷泡蜗牛	Bulimulus bonariensis		Mollusca	831286	Bulimulus bonariensis		Eupulmonata	Stylommatophora	Orthalicoidea
109465422	2022-03-25 13:53:15	2022-03-25	2022-03-25 16:53:15 UTC	Buenos Aires	5299179	r-ento		2022-03-25 16:59:52 UTC	2022-03-26 13:50:38 UTC	research	CC-BY-NC	https://www.inaturalist.org/observations/109465422	https://inaturalist-open-data.s3.amazonaws.com/photos/184499857/medium.jpeg				1	0	false	2	CABA	-34.6034629521	-58.3815592155	9572				9572			FALSE	gps	gps		Distrito Federal	Ciudad de Buenos Aires	Argentina	Ciudad de Buenos Aires	Distrito Federal	Ghost Bulimulus	Bulimulus bonariensis		Mollusca	831286	Bulimulus bonariensis		Eupulmonata	Stylommatophora	Orthalicoidea
109549619	2022/03/12 8:51 AM -0300	2022-03-12	2022-03-12 11:51:00 UTC	Brasilia	5403004	organizacion_isla_verde		2022-03-26 15:47:30 UTC	2022-03-30 00:05:27 UTC	research	CC-BY-NC	https://www.inaturalist.org/observations/109549619	https://inaturalist-open-data.s3.amazonaws.com/photos/184656739/medium.jpeg			Relevamiento RUD El Palomar-Isla Verde. Registro fotográfico: Sabrina Ferraris	1	0	false		El Palomar, Provincia de Buenos Aires, Argentina	-34.6215862307	-58.6128984406	72				72			FALSE				Morón	Buenos Aires	Argentina	Buenos Aires	Morón	Ghost Bulimulus	Bulimulus bonariensis		Mollusca	831286	Bulimulus bonariensis		Eupulmonata	Stylommatophora	Orthalicoidea
109705354	2022/03/27 3:42 PM -0300	2022-03-27	2022-03-27 18:42:00 UTC	Buenos Aires	893121	martin_arregui	Martin Arregui	2022-03-27 23:18:44 UTC	2022-03-28 22:24:05 UTC	research	CC-BY-NC	https://www.inaturalist.org/observations/109705354	https://inaturalist-open-data.s3.amazonaws.com/photos/184939422/medium.jpeg				1	0	false		Berisso, Provincia de Buenos Aires, Argentina	-34.9402278548	-57.7330125841	3642				3642			FALSE				Berisso	Buenos Aires	Argentina	Buenos Aires	Berisso	Ghost Bulimulus	Bulimulus bonariensis		Mollusca	831286	Bulimulus bonariensis		Eupulmonata	Stylommatophora	Orthalicoidea
109747293	2022/03/27 9:10 AM -0300	2022-03-27	2022-03-27 12:10:00 UTC	Brasilia	4234570	silvia_mallet	Silvia Mallet	2022-03-28 12:26:16 UTC	2022-04-11 19:12:45 UTC	research	CC-BY-NC	https://www.inaturalist.org/observations/109747293	https://inaturalist-open-data.s3.amazonaws.com/photos/185025633/medium.jpeg				2	0	false		Gral. Pico, La Pampa, Argentina	-35.6593239	-63.7577887	4571				4571			FALSE				Maracó	La Pampa	Argentina	La Pampa	Maracó	Ghost Bulimulus	Bulimulus bonariensis		Mollusca	831286	Bulimulus bonariensis		Eupulmonata	Stylommatophora	Orthalicoidea
110169260	2022/04/01 4:26 PM -0300	2022-04-01	2022-04-01 19:26:00 UTC	Buenos Aires	972932	ejnadal	Eduardo Nadal	2022-04-02 12:24:16 UTC	2022-04-11 19:12:14 UTC	research	CC-BY-NC	https://www.inaturalist.org/observations/110169260	https://inaturalist-open-data.s3.amazonaws.com/photos/185806060/medium.jpg				2	0	false		Villa Giardino, Córdoba, Argentina	-31.0242033333	-64.4727216667								FALSE				Punilla	Córdoba	Argentina	Córdoba	Punilla	Ghost Bulimulus	Bulimulus bonariensis		Mollusca	831286	Bulimulus bonariensis		Eupulmonata	Stylommatophora	Orthalicoidea
110361227	2022/04/03 5:25 PM -03	2022-04-03	2022-04-03 20:25:00 UTC	Buenos Aires	144	trekman	Gustavo Fernando Durán	2022-04-04 02:29:57 UTC	2022-04-04 16:32:40 UTC	research	CC-BY-NC-SA	https://www.inaturalist.org/observations/110361227	https://inaturalist-open-data.s3.amazonaws.com/photos/186154204/medium.jpg				1	0	false		San Jeronimo Nte., Santa Fe, Argentina	-31.5514355314	-61.0857530503	14				14			FALSE				Las Colonias	Santa Fe	Argentina	Santa Fe	Las Colonias	Ghost Bulimulus	Bulimulus bonariensis		Mollusca	831286	Bulimulus bonariensis		Eupulmonata	Stylommatophora	Orthalicoidea
110816699	2022-04-08 14:50:23	2022-04-08	2022-04-08 17:50:23 UTC	Buenos Aires	2530824	animamotrix1	Anima Motrix	2022-04-09 04:11:05 UTC	2022-04-09 21:26:14 UTC	research	CC-BY-NC	https://www.inaturalist.org/observations/110816699	https://inaturalist-open-data.s3.amazonaws.com/photos/187001741/medium.jpeg				2	0	false	2	Belgrano, CABA, Argentina	-34.5385976692	-58.4433814511	382				382			FALSE	gps	gps		Distrito Federal	Ciudad de Buenos Aires	Argentina	Ciudad de Buenos Aires	Distrito Federal	Bulimulus bonariensis	Bulimulus bonariensis		Mollusca	831286	Bulimulus bonariensis		Eupulmonata	Stylommatophora	Orthalicoidea
110883161	2022-04-08 15:57:06	2022-04-08	2022-04-08 18:57:06 UTC	Buenos Aires	2530824	animamotrix1	Anima Motrix	2022-04-09 20:07:03 UTC	2022-04-10 21:58:22 UTC	research	CC-BY-NC	https://www.inaturalist.org/observations/110883161	https://inaturalist-open-data.s3.amazonaws.com/photos/187120548/medium.jpeg				1	0	false	2	Belgrano, CABA, Argentina	-34.5387633781	-58.4446521476	382				382			FALSE	gps	gps		Distrito Federal	Ciudad de Buenos Aires	Argentina	Ciudad de Buenos Aires	Distrito Federal	Ghost Bulimulus	Bulimulus bonariensis		Mollusca	831286	Bulimulus bonariensis		Eupulmonata	Stylommatophora	Orthalicoidea
110909265	2022/04/09 12:22 PM -0300	2022-04-09	2022-04-09 15:22:00 UTC	Buenos Aires	782978	matiascabezas	Matias Cabezas	2022-04-10 00:27:13 UTC	2022-04-11 19:09:19 UTC	research	CC-BY	https://www.inaturalist.org/observations/110909265	https://inaturalist-open-data.s3.amazonaws.com/photos/187166617/medium.jpeg				1	0	false		Berazategui, Provincia de Buenos Aires, Argentina	-34.7536176576	-58.1098610213	25				25			FALSE				Berazategui	Buenos Aires	Argentina	Buenos Aires	Berazategui	Ghost Bulimulus	Bulimulus bonariensis		Mollusca	831286	Bulimulus bonariensis		Eupulmonata	Stylommatophora	Orthalicoidea
111241037	2022/04/10 12:31 PM -0300	2022-04-10	2022-04-10 15:31:00 UTC	Buenos Aires	429193	bombin	Pablo Bombín	2022-04-12 21:11:15 UTC	2022-04-13 19:49:40 UTC	research	CC0	https://www.inaturalist.org/observations/111241037	https://inaturalist-open-data.s3.amazonaws.com/photos/187762464/medium.jpeg				1	0	false		Reserva Costera Municipal de Avellaneda, Eco Área, Provincia de Buenos Aires, Argentina	-34.663993432	-58.3178329468	122				122			FALSE				Avellaneda	Buenos Aires	Argentina	Buenos Aires	Avellaneda	Bulimulus bonariensis	Bulimulus bonariensis		Mollusca	831286	Bulimulus bonariensis		Eupulmonata	Stylommatophora	Orthalicoidea
111350168	2022/04/13 15:07 PM -03	2022-04-13	2022-04-13 18:07:00 UTC	Buenos Aires	144	trekman	Gustavo Fernando Durán	2022-04-13 21:13:46 UTC	2022-04-14 16:07:36 UTC	research	CC-BY-NC-SA	https://www.inaturalist.org/observations/111350168	https://inaturalist-open-data.s3.amazonaws.com/photos/187960302/medium.jpg				1	0	false		Ciudad de Santa Fe, Provincia de Santa Fe, Argentina	-31.618668	-60.683199								FALSE				La Capital	Santa Fe	Argentina	Santa Fe	La Capital	Ghost Bulimulus	Bulimulus bonariensis		Mollusca	831286	Bulimulus bonariensis		Eupulmonata	Stylommatophora	Orthalicoidea
111534161	2022-04-15 10:15:13	2022-04-15	2022-04-15 13:15:13 UTC	Buenos Aires	3492146	cesarazehn11	Cesar A. Zehnder	2022-04-15 16:34:26 UTC	2022-04-25 13:18:34 UTC	research		https://www.inaturalist.org/observations/111534161	https://static.inaturalist.org/photos/188294155/medium.jpeg				2	0	false	2	Unión, Córdoba, Argentina	-32.8806179925	-62.6186883822	848				848			FALSE	gps	gps		Unión	Córdoba	Argentina	Córdoba	Unión	Ghost Bulimulus	Bulimulus bonariensis		Mollusca	831286	Bulimulus bonariensis		Eupulmonata	Stylommatophora	Orthalicoidea
111713570	2022/03/06 10:17 AM -0300	2022-03-06	2022-03-06 13:17:00 UTC	Buenos Aires	966066	silviolamothe		2022-04-16 23:04:59 UTC	2022-04-18 17:07:16 UTC	research	CC-BY-NC	https://www.inaturalist.org/observations/111713570	https://inaturalist-open-data.s3.amazonaws.com/photos/188617028/medium.jpeg				1	0	false		Gral Villegas, Provincia de Buenos Aires, Argentina	-35.0480953185	-63.0450754751	488				488			FALSE				General Villegas	Buenos Aires	Argentina	Buenos Aires	General Villegas	Ghost Bulimulus	Bulimulus bonariensis		Mollusca	831286	Bulimulus bonariensis		Eupulmonata	Stylommatophora	Orthalicoidea
111885706	2022/03/29 5:11 PM -0300	2022-03-29	2022-03-29 20:11:00 UTC	Buenos Aires	2424754	taielnazar	Taiel Nazar	2022-04-18 04:06:58 UTC	2023-07-08 07:59:08 UTC	research	CC-BY	https://www.inaturalist.org/observations/111885706	https://inaturalist-open-data.s3.amazonaws.com/photos/188931319/medium.jpg				1	0	false		Burzaco, Provincia de Buenos Aires, Argentina	-34.8438708737	-58.3856851766	2				2			FALSE				Almirante Brown	Buenos Aires	Argentina	Buenos Aires	Almirante Brown	Ghost Bulimulus	Bulimulus bonariensis		Mollusca	831286	Bulimulus bonariensis		Eupulmonata	Stylommatophora	Orthalicoidea
112042003	2022/04/17 2:13 PM UTC	2022-04-17	2022-04-17 14:13:00 UTC	UTC	2197647	nstor8	Néstor Trossero	2022-04-19 14:15:33 UTC	2022-04-19 14:31:33 UTC	research	CC0	https://www.inaturalist.org/observations/112042003	https://static.inaturalist.org/photos/189219182/medium.jpg				1	0	false		Paraná, AR-ER, AR	-31.75217	-60.492976	112				112			FALSE				Paraná	Entre Ríos	Argentina	Entre Ríos	Paraná	Bulimulus bonariensis	Bulimulus bonariensis		Mollusca	831286	Bulimulus bonariensis		Eupulmonata	Stylommatophora	Orthalicoidea
112762714	2022/04/16 4:05 PM	2022-04-16	2022-04-16 19:05:00 UTC	America/Argentina/Salta	3625121	mimacoronel	María Silvia Coronel	2022-04-24 23:54:12 UTC	2022-08-18 11:22:18 UTC	research	CC-BY-NC	https://www.inaturalist.org/observations/112762714	https://inaturalist-open-data.s3.amazonaws.com/photos/190485110/medium.jpeg				1	0	false		General Pico, La Pampa, Argentina	-35.6593239	-63.7577887	4571				4571			FALSE				Maracó	La Pampa	Argentina	La Pampa	Maracó	Ghost Bulimulus	Bulimulus bonariensis		Mollusca	831286	Bulimulus bonariensis		Eupulmonata	Stylommatophora	Orthalicoidea
113162596	2022/04/27 5:18 PM	2022-04-27	2022-04-27 20:18:00 UTC	America/Argentina/Cordoba	4355072	ricardomoyano	Ricardo D. Moyano	2022-04-28 00:31:26 UTC	2022-04-28 16:22:34 UTC	research	CC-BY-NC	https://www.inaturalist.org/observations/113162596	https://inaturalist-open-data.s3.amazonaws.com/photos/191199834/medium.jpeg				1	0	false		Guaraní, Misiones, Argentina	-27.2021299582	-54.094322811	244				244			FALSE				Guaraní	Misiones	Argentina	Misiones	Guaraní	Bulimulus bonariensis	Bulimulus bonariensis		Mollusca	831286	Bulimulus bonariensis		Eupulmonata	Stylommatophora	Orthalicoidea
114263319	2022-05-01 12:54:25	2022-05-01	2022-05-01 15:54:25 UTC	America/Argentina/Cordoba	2451257	dslepikas	Daniel O. Slepikas	2022-05-01 16:01:00 UTC	2022-05-03 16:31:34 UTC	research		https://www.inaturalist.org/observations/114263319	https://static.inaturalist.org/photos/192968239/medium.jpeg			Longitud 3cm	1	0	false	2	Oro Verde, Entre Ríos, Argentina	-31.823395	-60.5200609722								FALSE	gps	gps		Paraná	Entre Ríos	Argentina	Entre Ríos	Paraná	Ghost Bulimulus	Bulimulus bonariensis		Mollusca	831286	Bulimulus bonariensis		Eupulmonata	Stylommatophora	Orthalicoidea
114321267	2022-04-30 12:32:22	2022-04-30	2022-04-30 15:32:22 UTC	Buenos Aires	3555874	micaelayakowitz22		2022-05-01 18:11:30 UTC	2022-05-08 14:00:17 UTC	research	CC-BY-NC	https://www.inaturalist.org/observations/114321267	https://inaturalist-open-data.s3.amazonaws.com/photos/193059223/medium.jpeg				1	0	false	2	San Nicolás de los Arroyos, Buenos Aires Province, Argentina	-33.364932	-60.314968	878				878			FALSE	gps	manual		San Nicolás	Buenos Aires	Argentina	Buenos Aires	San Nicolás	Ghost Bulimulus	Bulimulus bonariensis		Mollusca	831286	Bulimulus bonariensis		Eupulmonata	Stylommatophora	Orthalicoidea
114426459	2022/04/30 11:20 AM	2022-04-30	2022-04-30 14:20:00 UTC	Buenos Aires	854602	juanmago	Juan Matías	2022-05-01 22:13:12 UTC	2022-05-02 20:44:08 UTC	research	CC-BY-NC	https://www.inaturalist.org/observations/114426459	https://inaturalist-open-data.s3.amazonaws.com/photos/193207897/medium.jpeg				1	0	false		Berazategui, Provincia de Buenos Aires, Argentina	-34.7513156379	-58.1208210032	8				8			FALSE				Berazategui	Buenos Aires	Argentina	Buenos Aires	Berazategui	Ghost Bulimulus	Bulimulus bonariensis		Mollusca	831286	Bulimulus bonariensis		Eupulmonata	Stylommatophora	Orthalicoidea
114915927	2022/05/01 11:25 AM	2022-05-01	2022-05-01 14:25:00 UTC	America/Argentina/Cordoba	1111470	leoleiva	Leonardo Adrián LEIVA	2022-05-02 22:58:50 UTC	2022-05-03 14:59:54 UTC	research	CC-BY-NC	https://www.inaturalist.org/observations/114915927	https://inaturalist-open-data.s3.amazonaws.com/photos/193990715/medium.jpeg				1	0	false		Colón 2130, Santo Tome (Dpto. La Capital), Santa Fe, Argentina	-31.6681287711	-60.7643775721	4				4			FALSE				La Capital	Santa Fe	Argentina	Santa Fe	La Capital	Ghost Bulimulus	Bulimulus bonariensis		Mollusca	831286	Bulimulus bonariensis		Eupulmonata	Stylommatophora	Orthalicoidea
115435995	2022/04/30 12:24 PM	2022-04-30	2022-04-30 15:24:00 UTC	Buenos Aires	2662436	alelallo	Alejandra Lallo	2022-05-04 20:02:26 UTC	2022-05-05 14:54:46 UTC	research	CC-BY-NC	https://www.inaturalist.org/observations/115435995	https://inaturalist-open-data.s3.amazonaws.com/photos/194821489/medium.jpg				1	0	false		San Nicolás, Provincia de Buenos Aires, Argentina	-33.3586162186	-60.3255326286	15				15			FALSE				Constitución	Santa Fe	Argentina	Santa Fe	Constitución	Ghost Bulimulus	Bulimulus bonariensis		Mollusca	831286	Bulimulus bonariensis		Eupulmonata	Stylommatophora	Orthalicoidea
115817242	2022-05-06 16:34:00-03:00	2022-05-06	2022-05-06 19:34:00 UTC	America/Argentina/Cordoba	723035	juanitoescamilla	Juanito Escamilla	2022-05-06 23:35:16 UTC	2023-03-18 20:05:47 UTC	research	CC-BY	https://www.inaturalist.org/observations/115817242	https://inaturalist-open-data.s3.amazonaws.com/photos/195470527/medium.jpg				1	0	false	3	Corrientes City, Corrientes, Corrientes, AR	-27.4903833333	-58.75933	10				10			FALSE				Capital	Corrientes	Argentina	Corrientes	Capital	Ghost Bulimulus	Bulimulus bonariensis		Mollusca	831286	Bulimulus bonariensis		Eupulmonata	Stylommatophora	Orthalicoidea
115944798	2022/04/30 12:52 PM	2022-04-30	2022-04-30 15:52:00 UTC	Buenos Aires	3555874	micaelayakowitz22		2022-05-07 18:17:26 UTC	2022-05-09 22:22:16 UTC	research	CC-BY-NC	https://www.inaturalist.org/observations/115944798	https://inaturalist-open-data.s3.amazonaws.com/photos/195616703/medium.jpg				2	0	false		San Nicolás Partido, Buenos Aires Province, Argentina	-33.3579806302	-60.321629171	268				268			FALSE				San Nicolás	Buenos Aires	Argentina	Buenos Aires	San Nicolás	Ghost Bulimulus	Bulimulus bonariensis		Mollusca	831286	Bulimulus bonariensis		Eupulmonata	Stylommatophora	Orthalicoidea
116672562	2022-05-11 11:40:00	2022-05-11	2022-05-11 14:40:00 UTC	Buenos Aires	5060539	calandria4		2022-05-12 10:13:43 UTC	2022-05-13 23:42:53 UTC	research	CC-BY-NC	https://www.inaturalist.org/observations/116672562	https://inaturalist-open-data.s3.amazonaws.com/photos/196968877/medium.jpeg				1	0	false	2	FH73+CM, Buenos Aires, Argentina	-34.53648375	-58.4459266667								FALSE				Distrito Federal	Ciudad de Buenos Aires	Argentina	Ciudad de Buenos Aires	Distrito Federal	Bulimulus bonariensis	Bulimulus bonariensis		Mollusca	831286	Bulimulus bonariensis		Eupulmonata	Stylommatophora	Orthalicoidea
117600609	2022-04-30 17:54:08	2022-04-30	2022-04-30 20:54:08 UTC	America/Argentina/Cordoba	2530644	mirian15	Mirian Del Rio	2022-05-18 15:26:05 UTC	2022-10-30 17:22:36 UTC	research		https://www.inaturalist.org/observations/117600609	https://static.inaturalist.org/photos/198628797/medium.jpeg				2	0	false	2	San Fernando, AR-CC, AR	-27.4533333333	-59.0088888889								FALSE	gps	gps		San Fernando	Chaco	Argentina	Chaco	San Fernando	Ghost Bulimulus	Bulimulus bonariensis		Mollusca	831286	Bulimulus bonariensis		Eupulmonata	Stylommatophora	Orthalicoidea
117795783	2018/01/07 8:28 PM	2018-01-07	2018-01-07 23:28:00 UTC	Buenos Aires	3411038	joseluisblazquez		2022-05-19 23:38:12 UTC	2022-07-13 22:48:00 UTC	research	CC-BY-NC	https://www.inaturalist.org/observations/117795783	https://inaturalist-open-data.s3.amazonaws.com/photos/198969114/medium.jpg				3	1	false		Acassuso, Provincia de Buenos Aires, Argentina	-34.4690284518	-58.4941249517	147				147			FALSE				San Isidro	Buenos Aires	Argentina	Buenos Aires	San Isidro	Bulimulus bonariensis	Bulimulus bonariensis		Mollusca	831286	Bulimulus bonariensis		Eupulmonata	Stylommatophora	Orthalicoidea
117953461	2022/05/18 2:18 PM	2022-05-18	2022-05-18 17:18:00 UTC	America/Argentina/Cordoba	144	trekman	Gustavo Fernando Durán	2022-05-21 03:08:31 UTC	2022-05-21 16:35:13 UTC	research	CC-BY-NC-SA	https://www.inaturalist.org/observations/117953461	https://inaturalist-open-data.s3.amazonaws.com/photos/199243617/medium.jpeg				1	0	false		La Capital, Santa Fe, Argentina	-31.6357377906	-60.6758141157	41				41			FALSE				La Capital	Santa Fe	Argentina	Santa Fe	La Capital	Ghost Bulimulus	Bulimulus bonariensis		Mollusca	831286	Bulimulus bonariensis		Eupulmonata	Stylommatophora	Orthalicoidea
118241479	2022-05-21 12:54:35	2022-05-21	2022-05-21 15:54:35 UTC	America/Argentina/Cordoba	3509797	juli_ame	Julieta Ameglio	2022-05-22 19:01:07 UTC	2022-05-23 14:45:27 UTC	research	CC-BY-NC	https://www.inaturalist.org/observations/118241479	https://inaturalist-open-data.s3.amazonaws.com/photos/199749165/medium.jpeg				2	0	false	2	Funes, Santa Fe, Argentina	-32.9042874994	-60.801419355	361				361			FALSE	gps	gps		Rosario	Santa Fe	Argentina	Santa Fe	Rosario	Ghost Bulimulus	Bulimulus bonariensis		Mollusca	831286	Bulimulus bonariensis		Eupulmonata	Stylommatophora	Orthalicoidea
118268925	2022/05/22 6:15 PM	2022-05-22	2022-05-22 21:15:00 UTC	Buenos Aires	2479819	el-naturalista	El Naturalista	2022-05-22 21:25:20 UTC	2022-05-23 19:01:08 UTC	research	CC-BY-NC	https://www.inaturalist.org/observations/118268925	https://inaturalist-open-data.s3.amazonaws.com/photos/199796487/medium.png			Varios ejemplares, bajo un plastico negro (no los vi en el campo trabajado).	1	0	false		Bahía Blanca, Provincia de Buenos Aires, Argentina	-38.6760247594	-62.3131867852	61				61			FALSE				Bahía Blanca	Buenos Aires	Argentina	Buenos Aires	Bahía Blanca	Ghost Bulimulus	Bulimulus bonariensis		Mollusca	831286	Bulimulus bonariensis		Eupulmonata	Stylommatophora	Orthalicoidea
118409268	2022/05/21 12:02 PM	2022-05-21	2022-05-21 15:02:00 UTC	Buenos Aires	1454648	r-a-p	RAP	2022-05-23 19:01:52 UTC	2022-05-24 16:23:20 UTC	research	CC-BY-NC	https://www.inaturalist.org/observations/118409268	https://static.inaturalist.org/photos/200053676/medium.jpg				1	0	false		Cam. de la Ribera Nte. 480, B1641 Acassuso, Provincia de Buenos Aires, Argentina	-34.4701831	-58.4961097	194				194			FALSE				San Isidro	Buenos Aires	Argentina	Buenos Aires	San Isidro	Ghost Bulimulus	Bulimulus bonariensis		Mollusca	831286	Bulimulus bonariensis		Eupulmonata	Stylommatophora	Orthalicoidea
118982687	2022/04/28 12:44 PM	2022-04-28	2022-04-28 15:44:00 UTC	Buenos Aires	1454648	r-a-p	RAP	2022-05-27 22:45:29 UTC	2022-05-30 22:04:59 UTC	research	CC-BY-NC	https://www.inaturalist.org/observations/118982687	https://static.inaturalist.org/photos/201090322/medium.jpg				1	0	false		Lago Lugano, Buenos Aires, Argentina	-34.6811316	-58.44516	356				356			FALSE				Distrito Federal	Ciudad de Buenos Aires	Argentina	Ciudad de Buenos Aires	Distrito Federal	Ghost Bulimulus	Bulimulus bonariensis		Mollusca	831286	Bulimulus bonariensis		Eupulmonata	Stylommatophora	Orthalicoidea
120243891	Sat Jun 04 2022 14:45:07 GMT-0300 (GMT-3)	2022-06-04	2022-06-04 17:45:07 UTC	Buenos Aires	2551145	alfanova	Valentín Alfano	2022-06-04 23:11:35 UTC	2022-06-06 03:48:44 UTC	research	CC-BY-NC	https://www.inaturalist.org/observations/120243891	https://inaturalist-open-data.s3.amazonaws.com/photos/203348503/medium.jpg				2	0	false	3	Bahía Blanca, Bahía Blanca, Buenos Aires, AR	-38.68823667	-62.35276333	5				5			FALSE				Bahía Blanca	Buenos Aires	Argentina	Buenos Aires	Bahía Blanca	Bulimulus bonariensis	Bulimulus bonariensis		Mollusca	831286	Bulimulus bonariensis		Eupulmonata	Stylommatophora	Orthalicoidea
120506574	2022/06/04 4:06 PM	2022-06-04	2022-06-04 19:06:00 UTC	Buenos Aires	3225167	laurabm2020	Lauu	2022-06-06 13:36:06 UTC	2022-06-07 21:59:18 UTC	research	CC-BY	https://www.inaturalist.org/observations/120506574	https://inaturalist-open-data.s3.amazonaws.com/photos/203829414/medium.jpeg				2	0	false		Rivadavia, Provincia de Buenos Aires, Argentina	-35.5141494492	-62.982623281	61				61			FALSE				Rivadavia	Buenos Aires	Argentina	Buenos Aires	Rivadavia	Ghost Bulimulus	Bulimulus bonariensis		Mollusca	831286	Bulimulus bonariensis		Eupulmonata	Stylommatophora	Orthalicoidea
127233237	2022-07-20 16:23:37	2022-07-20	2022-07-20 19:23:37 UTC	America/Argentina/Cordoba	3640164	luchila	Lucila Boasso	2022-07-21 15:22:29 UTC	2023-07-31 23:55:57 UTC	research	CC-BY-NC	https://www.inaturalist.org/observations/127233237	https://inaturalist-open-data.s3.amazonaws.com/photos/215980386/medium.jpeg				2	0	false	2	La Capital, Santa Fe, Argentina	-31.5971748861	-60.6632782146	496				496			FALSE	gps	gps		La Capital	Santa Fe	Argentina	Santa Fe	La Capital	Bulimulus bonariensis	Bulimulus bonariensis		Mollusca	831286	Bulimulus bonariensis		Eupulmonata	Stylommatophora	Orthalicoidea
129369177	2022-08-02 16:36:10	2022-08-02	2022-08-02 19:36:10 UTC	Buenos Aires	5060539	calandria4		2022-08-04 03:25:16 UTC	2022-08-31 14:43:00 UTC	research	CC-BY-NC	https://www.inaturalist.org/observations/129369177	https://inaturalist-open-data.s3.amazonaws.com/photos/219841020/medium.jpeg				1	0	false	2	Reserva Ecológica Ciudad Universitaria-Costanera Norte	-34.5385446423	-58.4436640888	121				121			FALSE	gps	gps		Distrito Federal	Ciudad de Buenos Aires	Argentina	Ciudad de Buenos Aires	Distrito Federal	Ghost Bulimulus	Bulimulus bonariensis		Mollusca	831286	Bulimulus bonariensis		Eupulmonata	Stylommatophora	Orthalicoidea
132482825	2022-08-26 17:34:25	2022-08-26	2022-08-26 20:34:25 UTC	America/Argentina/Cordoba	972932	ejnadal	Eduardo Nadal	2022-08-26 23:57:48 UTC	2022-09-09 19:12:15 UTC	research	CC-BY-NC	https://www.inaturalist.org/observations/132482825	https://inaturalist-open-data.s3.amazonaws.com/photos/225604034/medium.jpeg				2	0	false	2	Aeropuerto Misiones, Aero Internacional de Puerto, Puerto Iguazú, Misiones, Argentina	-25.7317866667	-54.4754133333								FALSE	gps	gps		Iguazú	Misiones	Argentina	Misiones	Iguazú	Ghost Bulimulus	Bulimulus bonariensis		Mollusca	831286	Bulimulus bonariensis		Eupulmonata	Stylommatophora	Orthalicoidea
132968625	2022/08/29 12:52 PM	2022-08-29	2022-08-29 15:52:00 UTC	Buenos Aires	1458503	lorenazapata	Lorena Zapata	2022-08-30 16:57:05 UTC	2023-05-24 22:48:49 UTC	research	CC-BY-NC	https://www.inaturalist.org/observations/132968625	https://inaturalist-open-data.s3.amazonaws.com/photos/226415446/medium.jpg				2	0	false		Reserva Ecológica Costanera Sur, CABA, Argentina	-34.613936189	-58.3492899359	58				58			FALSE				Distrito Federal	Ciudad de Buenos Aires	Argentina	Ciudad de Buenos Aires	Distrito Federal	Bulimulus bonariensis	Bulimulus bonariensis		Mollusca	831286	Bulimulus bonariensis		Eupulmonata	Stylommatophora	Orthalicoidea
135066748	2022/09/13 4:37 PM	2022-09-13	2022-09-13 19:37:00 UTC	Buenos Aires	2578408	dermochelys	Valentín Vidal	2022-09-15 01:30:32 UTC	2022-09-15 12:10:36 UTC	research	CC-BY-NC	https://www.inaturalist.org/observations/135066748	https://inaturalist-open-data.s3.amazonaws.com/photos/230322030/medium.jpg				1	0	false		Intendente Güiraldes 2160, Buenos Aires, C1704 CABA, Argentina	-34.538547	-58.443664	120				120			FALSE				Distrito Federal	Ciudad de Buenos Aires	Argentina	Ciudad de Buenos Aires	Distrito Federal	Ghost Bulimulus	Bulimulus bonariensis		Mollusca	831286	Bulimulus bonariensis		Eupulmonata	Stylommatophora	Orthalicoidea
135301833	2022-09-16 18:54:45	2022-09-16	2022-09-16 21:54:45 UTC	America/Argentina/Cordoba	1075963	enzo_ferreyra	Enzo Edgardo Ferreyra	2022-09-16 21:57:56 UTC	2023-07-25 23:49:15 UTC	research	CC-BY-NC	https://www.inaturalist.org/observations/135301833	https://static.inaturalist.org/photos/230747901/medium.jpeg				1	0	false	2	Yapeyú, Corrientes, Argentina	-29.4645617023	-56.8153690919	5				5			FALSE	gps	gps		San Martín	Corrientes	Argentina	Corrientes	San Martín	Ghost Bulimulus	Bulimulus bonariensis		Mollusca	831286	Bulimulus bonariensis		Eupulmonata	Stylommatophora	Orthalicoidea
135834075	2019/03/11 4:17 PM	2019-03-11	2019-03-11 19:17:00 UTC	America/Argentina/Cordoba	1205836	elbeltrocco	Eduardo Luis Beltrocco	2022-09-20 20:46:25 UTC	2022-09-23 10:28:19 UTC	research	CC-BY-NC	https://www.inaturalist.org/observations/135834075	https://inaturalist-open-data.s3.amazonaws.com/photos/231737302/medium.jpeg				1	0	false		Santo Tomé, Santa Fe, Argentina	-31.6615564468	-60.7608006983	2				2			FALSE				La Capital	Santa Fe	Argentina	Santa Fe	La Capital	Ghost Bulimulus	Bulimulus bonariensis		Mollusca	831286	Bulimulus bonariensis		Eupulmonata	Stylommatophora	Orthalicoidea
136576303	2022-09-26 10:05:32	2022-09-26	2022-09-26 13:05:32 UTC	America/Argentina/Cordoba	6175551	orcovegan	Brian	2022-09-26 15:07:50 UTC	2022-09-26 15:16:33 UTC	research		https://www.inaturalist.org/observations/136576303	https://static.inaturalist.org/photos/233117159/medium.jpeg				1	0	false	2	Guaraní, Misiones, Argentina	-26.7411583333	-54.2683527778								FALSE	gps	gps		Guaraní	Misiones	Argentina	Misiones	Guaraní	Ghost Bulimulus	Bulimulus bonariensis		Mollusca	831286	Bulimulus bonariensis		Eupulmonata	Stylommatophora	Orthalicoidea
137547664	2022-10-04 14:37:28	2022-10-04	2022-10-04 17:37:28 UTC	Buenos Aires	3863194	gabriela456	Gabriela Bergesio	2022-10-04 17:48:19 UTC	2022-10-06 13:00:27 UTC	research		https://www.inaturalist.org/observations/137547664	https://static.inaturalist.org/photos/234937637/medium.jpeg				1	0	false	2	Flores, CABA, Argentina	-34.6370514854	-58.4625458345	6				6			FALSE	gps	gps		Distrito Federal	Ciudad de Buenos Aires	Argentina	Ciudad de Buenos Aires	Distrito Federal	Ghost Bulimulus	Bulimulus bonariensis		Mollusca	831286	Bulimulus bonariensis		Eupulmonata	Stylommatophora	Orthalicoidea
140548320	2022/10/29 3:23 PM	2022-10-29	2022-10-29 18:23:00 UTC	America/Argentina/Cordoba	4355072	ricardomoyano	Ricardo D. Moyano	2022-10-30 18:16:42 UTC	2022-10-30 19:41:46 UTC	research	CC-BY-NC	https://www.inaturalist.org/observations/140548320	https://inaturalist-open-data.s3.amazonaws.com/photos/240597390/medium.jpeg				1	0	false		Guaraní, Misiones, Argentina	-27.2001451587	-54.0167318686	244				244			FALSE				Guaraní	Misiones	Argentina	Misiones	Guaraní	Ghost Bulimulus	Bulimulus bonariensis		Mollusca	831286	Bulimulus bonariensis		Eupulmonata	Stylommatophora	Orthalicoidea
141296037	2011/09/25 12:08 PM	2011-09-25	2011-09-25 15:08:00 UTC	America/Argentina/Cordoba	1742792	diegoeseolivera	DiegoEseO	2022-11-06 19:41:06 UTC	2022-11-07 19:06:04 UTC	research	CC-BY-NC	https://www.inaturalist.org/observations/141296037	https://inaturalist-open-data.s3.amazonaws.com/photos/242025486/medium.jpeg				1	0	false		Maestras Piaggio, Gualeguaychú, Entre Ríos, Argentina	-32.9897422	-58.5454406	206				206			FALSE				Gualeguaychú	Entre Ríos	Argentina	Entre Ríos	Gualeguaychú	Ghost Bulimulus	Bulimulus bonariensis		Mollusca	831286	Bulimulus bonariensis		Eupulmonata	Stylommatophora	Orthalicoidea
142129410	2022-11-15 16:49:59	2022-11-15	2022-11-15 19:49:59 UTC	Buenos Aires	3875525	juanurrutia	Juan Urrutia	2022-11-16 08:41:20 UTC	2022-11-17 13:01:15 UTC	research	CC-BY-NC	https://www.inaturalist.org/observations/142129410	https://inaturalist-open-data.s3.amazonaws.com/photos/243626875/medium.jpeg				1	0	false	2	Carlos Tejedor, Provincia de Buenos Aires, Argentina	-35.3878631389	-62.4498214722								FALSE	gps	gps		Carlos Tejedor	Buenos Aires	Argentina	Buenos Aires	Carlos Tejedor	Bulimulus bonariensis	Bulimulus bonariensis		Mollusca	831286	Bulimulus bonariensis		Eupulmonata	Stylommatophora	Orthalicoidea
142478104	2022/11/20 4:06 PM	2022-11-20	2022-11-20 19:06:00 UTC	America/Argentina/Cordoba	2682583	arielrotondo	Ariel Rotondo	2022-11-20 20:27:13 UTC	2022-11-20 20:37:10 UTC	research	CC-BY-NC	https://www.inaturalist.org/observations/142478104	https://inaturalist-open-data.s3.amazonaws.com/photos/244272462/medium.jpg				1	0	false		Santa Teresa, Santa Fe, Argentina	-33.4416549291	-60.7941679644	15				15			FALSE				Constitución	Santa Fe	Argentina	Santa Fe	Constitución	Ghost Bulimulus	Bulimulus bonariensis		Mollusca	831286	Bulimulus bonariensis		Eupulmonata	Stylommatophora	Orthalicoidea
143559751	2022-11-05 08:53:54	2022-11-05	2022-11-05 11:53:54 UTC	America/Argentina/Cordoba	2445036	martin_ferrari		2022-12-03 12:59:28 UTC	2022-12-04 01:03:06 UTC	research	CC-BY-NC	https://www.inaturalist.org/observations/143559751	https://inaturalist-open-data.s3.amazonaws.com/photos/246222225/medium.jpeg				1	0	false	2	Casa	-26.1806561841	-58.173962608	4				4			FALSE	gps	gps		Formosa	Formosa	Argentina	Formosa	Formosa	Ghost Bulimulus	Bulimulus bonariensis		Mollusca	831286	Bulimulus bonariensis		Eupulmonata	Stylommatophora	Orthalicoidea
143824082	2022-12-06 14:04:44	2022-12-06	2022-12-06 17:04:44 UTC	Buenos Aires	3794592	viole2309	Violeta Lang	2022-12-06 22:41:03 UTC	2022-12-07 13:32:57 UTC	research	CC-BY-NC	https://www.inaturalist.org/observations/143824082	https://inaturalist-open-data.s3.amazonaws.com/photos/246728470/medium.jpeg				1	0	false	2	Acassuso, Provincia de Buenos Aires, Argentina	-34.4684439722	-58.49334								FALSE	gps	gps		San Isidro	Buenos Aires	Argentina	Buenos Aires	San Isidro	Ghost Bulimulus	Bulimulus bonariensis		Mollusca	831286	Bulimulus bonariensis		Eupulmonata	Stylommatophora	Orthalicoidea
144179586	2022-12-11 12:39:12	2022-12-11	2022-12-11 15:39:12 UTC	America/Argentina/Cordoba	6253857	joel_1989	Joel	2022-12-11 21:24:01 UTC	2022-12-16 15:14:33 UTC	research	CC-BY-NC	https://www.inaturalist.org/observations/144179586	https://inaturalist-open-data.s3.amazonaws.com/photos/247408165/medium.jpeg				2	0	false	2	Islas del Ibicuy, Entre Ríos, Argentina	-33.856222011	-58.9456022903	1704				1704			FALSE	gps	gps		Islas del Ibicuy	Entre Ríos	Argentina	Entre Ríos	Islas del Ibicuy	Bulimulus bonariensis	Bulimulus bonariensis		Mollusca	831286	Bulimulus bonariensis		Eupulmonata	Stylommatophora	Orthalicoidea
144397758	2022-12-14 09:41:02	2022-12-14	2022-12-14 12:41:02 UTC	America/Argentina/Salta	2815997	msantillan		2022-12-15 03:20:31 UTC	2023-01-03 21:43:38 UTC	research	CC-BY-NC	https://www.inaturalist.org/observations/144397758	https://inaturalist-open-data.s3.amazonaws.com/photos/247819366/medium.jpeg				2	0	false	2	Toay, La Pampa, Argentina	-36.678316665	-64.391990304	21				21			FALSE	gps	gps		Toay	La Pampa	Argentina	La Pampa	Toay	Bulimulus bonariensis	Bulimulus bonariensis		Mollusca	831286	Bulimulus bonariensis		Eupulmonata	Stylommatophora	Orthalicoidea
144820802	2022/12/11 1:10 PM	2022-12-11	2022-12-11 16:10:00 UTC	America/Argentina/Cordoba	144	trekman	Gustavo Fernando Durán	2022-12-21 23:45:51 UTC	2022-12-21 23:55:18 UTC	research	CC-BY-NC-SA	https://www.inaturalist.org/observations/144820802	https://inaturalist-open-data.s3.amazonaws.com/photos/248640787/medium.jpg				1	0	false		Las Colonias, Santa Fe, Argentina	-31.5462479722	-61.0767609722								FALSE				Las Colonias	Santa Fe	Argentina	Santa Fe	Las Colonias	Ghost Bulimulus	Bulimulus bonariensis		Mollusca	831286	Bulimulus bonariensis		Eupulmonata	Stylommatophora	Orthalicoidea
145206163	2022-12-15 16:06:15	2022-12-15	2022-12-15 19:06:15 UTC	America/Argentina/Tucuman	164042	plainsashchalaca	Sasha Robinson	2022-12-27 19:46:18 UTC	2022-12-28 12:19:49 UTC	research		https://www.inaturalist.org/observations/145206163	https://static.inaturalist.org/photos/249388246/medium.jpeg				1	0	false	2	Monteros Department, Tucumán, Argentina	-27.0019643997	-65.6634221997								FALSE	gps	gps		Monteros	Tucumán	Argentina	Tucumán	Monteros	Ghost Bulimulus	Bulimulus bonariensis		Mollusca	831286	Bulimulus bonariensis		Eupulmonata	Stylommatophora	Orthalicoidea
145581772	2022/12/12 12:22 PM	2022-12-12	2022-12-12 15:22:00 UTC	Buenos Aires	1398663	alecearnshaw	Alec Earnshaw	2023-01-01 15:23:27 UTC	2023-01-01 18:05:48 UTC	research		https://www.inaturalist.org/observations/145581772	https://static.inaturalist.org/photos/250091789/medium.jpg				1	0	false		Reserva Natural de Pilar, Pilar, Buenos Aires	-34.4093544301	-58.9199692993	1062				1062			FALSE				Pilar	Buenos Aires	Argentina	Buenos Aires	Pilar	Ghost Bulimulus	Bulimulus bonariensis		Mollusca	831286	Bulimulus bonariensis		Eupulmonata	Stylommatophora	Orthalicoidea
145602484	2023-01-01 12:07:00	2023-01-01	2023-01-01 15:07:00 UTC	America/Argentina/Cordoba	3866233	paulabernardi	Paula Bernardi	2023-01-01 20:08:41 UTC	2023-01-01 20:32:31 UTC	research	CC-BY-NC	https://www.inaturalist.org/observations/145602484	https://inaturalist-open-data.s3.amazonaws.com/photos/250131301/medium.jpeg				1	0	false	2	Ucacha, Córdoba, Argentina	-33.0297742915	-63.5020487756	78				78			FALSE	gps	gps		Juárez Celman	Córdoba	Argentina	Córdoba	Juárez Celman	Bulimulus bonariensis	Bulimulus bonariensis		Mollusca	831286	Bulimulus bonariensis		Eupulmonata	Stylommatophora	Orthalicoidea
145670957	2023-01-02 12:46:02	2023-01-02	2023-01-02 15:46:02 UTC	America/Argentina/Cordoba	1438274	mariano421	Mariano Llarias	2023-01-02 15:47:52 UTC	2023-01-03 01:59:27 UTC	research		https://www.inaturalist.org/observations/145670957	https://static.inaturalist.org/photos/250264409/medium.jpeg				1	0	false	2	7X3Q+6M, Chajarí, Entre Ríos, Argentina	-30.7458576327	-58.0107668694	7				7			FALSE				Federación	Entre Ríos	Argentina	Entre Ríos	Federación	Ghost Bulimulus	Bulimulus bonariensis		Mollusca	831286	Bulimulus bonariensis		Eupulmonata	Stylommatophora	Orthalicoidea
146205348	2023/01/04 6:08 PM	2023-01-04	2023-01-04 21:08:00 UTC	America/Argentina/Tucuman	688093	analiab87	Analía Benavidez	2023-01-09 14:24:41 UTC	2023-01-10 14:54:27 UTC	research	CC-BY-NC	https://www.inaturalist.org/observations/146205348	https://inaturalist-open-data.s3.amazonaws.com/photos/251312697/medium.jpeg		Argentina, Tucumán, Fauna		2	0	false		El Bajo, San Miguel de Tucumán, Tucumán, Argentina	-26.830280023	-65.1952256058	8				8			FALSE				Capital	Tucumán	Argentina	Tucumán	Capital	Ghost Bulimulus	Bulimulus bonariensis		Mollusca	831286	Bulimulus bonariensis		Eupulmonata	Stylommatophora	Orthalicoidea
146482720	2023-01-13 14:27:58	2023-01-13	2023-01-13 17:27:58 UTC	America/Argentina/Cordoba	1075963	enzo_ferreyra	Enzo Edgardo Ferreyra	2023-01-13 19:50:30 UTC	2023-01-13 21:19:59 UTC	research	CC-BY-NC	https://www.inaturalist.org/observations/146482720	https://static.inaturalist.org/photos/251849482/medium.jpeg				1	0	false	2	Yapeyú, Corrientes, Argentina	-29.4645838875	-56.8153053895	6				6			FALSE	gps	gps		San Martín	Corrientes	Argentina	Corrientes	San Martín	Ghost Bulimulus	Bulimulus bonariensis		Mollusca	831286	Bulimulus bonariensis		Eupulmonata	Stylommatophora	Orthalicoidea
146485853	2023-01-13 17:42:52-03:00	2023-01-13	2023-01-13 20:42:52 UTC	America/Argentina/Tucuman	688093	analiab87	Analía Benavidez	2023-01-13 20:44:46 UTC	2023-03-01 05:14:08 UTC	research	CC-BY-NC	https://www.inaturalist.org/observations/146485853	https://inaturalist-open-data.s3.amazonaws.com/photos/251855555/medium.jpg		Caracoles, Argentina, Tucumán		1	0	false	3	Gobernador Celedonio Gutiérrez, Municipalidad de San Miguel De Tucuman, Tucumán, AR	-26.8303627289	-65.1952167906	11				11			FALSE				Capital	Tucumán	Argentina	Tucumán	Capital	Ghost Bulimulus	Bulimulus bonariensis		Mollusca	831286	Bulimulus bonariensis		Eupulmonata	Stylommatophora	Orthalicoidea
147212874	2023/01/22 9:32 AM	2023-01-22	2023-01-22 12:32:00 UTC	America/Argentina/Salta	2820474	hugoalbertovalderrey	Hugo	2023-01-23 19:57:50 UTC	2023-01-24 22:13:52 UTC	research	CC-BY-NC	https://www.inaturalist.org/observations/147212874	https://inaturalist-open-data.s3.amazonaws.com/photos/253272348/medium.jpg				1	0	false		Maracó, La Pampa, Argentina	-35.6826687942	-63.6967811561	244				244			FALSE				Maracó	La Pampa	Argentina	La Pampa	Maracó	Bulimulus bonariensis	Bulimulus bonariensis		Mollusca	831286	Bulimulus bonariensis		Eupulmonata	Stylommatophora	Orthalicoidea
147220132	2023-01-22 07:03:51	2023-01-22	2023-01-22 10:03:51 UTC	America/Argentina/Cordoba	1111470	leoleiva	Leonardo Adrián LEIVA	2023-01-23 21:48:33 UTC	2023-01-24 02:01:29 UTC	research	CC-BY-NC	https://www.inaturalist.org/observations/147220132	https://inaturalist-open-data.s3.amazonaws.com/photos/253287019/medium.jpeg				1	0	false	2	San Agustin, Santa Fe, Argentina	-31.6803004142	-60.9343486279	4				4			FALSE	gps	gps	San Agustín y alrededores	Las Colonias	Santa Fe	Argentina	Santa Fe	Las Colonias	Ghost Bulimulus	Bulimulus bonariensis		Mollusca	831286	Bulimulus bonariensis		Eupulmonata	Stylommatophora	Orthalicoidea
147275327	2023-01-19 12:02:23	2023-01-19	2023-01-19 15:02:23 UTC	Buenos Aires	1182839	giramone	Guille Ivan Spajic	2023-01-24 17:41:03 UTC	2023-03-13 14:41:35 UTC	research	CC-BY-NC	https://www.inaturalist.org/observations/147275327	https://inaturalist-open-data.s3.amazonaws.com/photos/253393176/medium.jpeg				1	0	false	2	Reserva Ecológica Vicente López, Av. Paraná y El Río, La Lucila, Provincia de Buenos Aires, Argentina	-34.4924430833	-58.4802741944								FALSE	gps	gps		San Isidro	Buenos Aires	Argentina	Buenos Aires	San Isidro	Ghost Bulimulus	Bulimulus bonariensis		Mollusca	831286	Bulimulus bonariensis		Eupulmonata	Stylommatophora	Orthalicoidea
147458963	2023-01-27 07:08:05	2023-01-27	2023-01-27 10:08:05 UTC	America/Argentina/Cordoba	2752593	miguelansenuza	Miguel	2023-01-27 14:39:54 UTC	2024-02-28 13:42:00 UTC	research	CC-BY-NC	https://www.inaturalist.org/observations/147458963	https://inaturalist-open-data.s3.amazonaws.com/photos/253743210/medium.jpeg				1	0	false	2	Balnearia, Córdoba, Argentina	-31.0277284	-62.661171								FALSE	gps	gps		San Justo	Córdoba	Argentina	Córdoba	San Justo	Ghost Bulimulus	Bulimulus bonariensis		Mollusca	831286	Bulimulus bonariensis		Eupulmonata	Stylommatophora	Orthalicoidea
147460461	2023/01/25 11:01 PM	2023-01-25	2023-01-26 02:01:00 UTC	America/Argentina/Cordoba	3660407	txurruarin	Isaias Maximiliano Churruarin	2023-01-27 15:04:09 UTC	2023-01-28 00:23:51 UTC	research	CC-BY-NC	https://www.inaturalist.org/observations/147460461	https://inaturalist-open-data.s3.amazonaws.com/photos/253745396/medium.jpeg				1	0	false		Nueve de Julio, Santa Fe, Argentina	-29.2658497661	-61.7573183225	61				61			FALSE				Nueve de Julio	Santa Fe	Argentina	Santa Fe	Nueve de Julio	Ghost Bulimulus	Bulimulus bonariensis		Mollusca	831286	Bulimulus bonariensis		Eupulmonata	Stylommatophora	Orthalicoidea
147757457	2023/01/22 9:29 AM	2023-01-22	2023-01-22 12:29:00 UTC	America/Argentina/Salta	5588906	ferferrari		2023-01-31 11:31:31 UTC	2024-05-08 22:18:54 UTC	research	CC0	https://www.inaturalist.org/observations/147757457	https://inaturalist-open-data.s3.amazonaws.com/photos/254308941/medium.jpeg				1	0	false		La Pampa, Argentina	-35.6788751	-63.6981183	94				94			FALSE				Maracó	La Pampa	Argentina	La Pampa	Maracó	Ghost Bulimulus	Bulimulus bonariensis		Mollusca	831286	Bulimulus bonariensis		Eupulmonata	Stylommatophora	Orthalicoidea
147788472	2023-01-31 18:43:49	2023-01-31	2023-01-31 21:43:49 UTC	America/Argentina/Cordoba	2689775	federicogratacos	Federico Gratacos	2023-01-31 21:45:31 UTC	2023-02-01 13:43:53 UTC	research		https://www.inaturalist.org/observations/147788472	https://static.inaturalist.org/photos/254368507/medium.jpeg				1	0	false	2	E3202, Entre Ríos, Argentina	-31.3925838333	-58.0147209167								FALSE	gps	gps		Concordia	Entre Ríos	Argentina	Entre Ríos	Concordia	Ghost Bulimulus	Bulimulus bonariensis		Mollusca	831286	Bulimulus bonariensis		Eupulmonata	Stylommatophora	Orthalicoidea
147902243	2023-02-02 15:47:32	2023-02-02	2023-02-02 18:47:32 UTC	America/Argentina/Cordoba	4536646	julian_balla	Julian Balla	2023-02-02 18:48:12 UTC	2023-02-02 21:42:30 UTC	research		https://www.inaturalist.org/observations/147902243	https://static.inaturalist.org/photos/254589877/medium.jpeg				1	0	false	2	Av. Jorge Newbery - Pedro Martinez, Paraná, Entre Ríos, Argentina	-31.7790933333	-60.4734466667	9				9			FALSE				Paraná	Entre Ríos	Argentina	Entre Ríos	Paraná	Ghost Bulimulus	Bulimulus bonariensis		Mollusca	831286	Bulimulus bonariensis		Eupulmonata	Stylommatophora	Orthalicoidea
148183454	2023-01-27 17:48:51	2023-01-27	2023-01-27 20:48:51 UTC	America/Argentina/Cordoba	6480369	marcela405	Marcela Noemí Daza	2023-02-06 14:57:09 UTC	2023-11-26 19:27:31 UTC	research		https://www.inaturalist.org/observations/148183454	https://static.inaturalist.org/photos/255130100/medium.jpeg				2	0	false	2	La Calera, Córdoba, Argentina	-31.352554659	-64.3401297927	4350				4350			FALSE	gps	gps		Colón	Córdoba	Argentina	Córdoba	Colón	Bulimulus bonariensis	Bulimulus bonariensis		Mollusca	831286	Bulimulus bonariensis		Eupulmonata	Stylommatophora	Orthalicoidea
148185014	2023-02-03 09:44:29	2023-02-03	2023-02-03 12:44:29 UTC	America/Argentina/Salta	3618207	latalo	Andrea Talone Rìo	2023-02-06 15:32:26 UTC	2023-02-06 15:33:31 UTC	research	CC-BY-NC	https://www.inaturalist.org/observations/148185014	https://inaturalist-open-data.s3.amazonaws.com/photos/255133291/medium.jpeg				1	0	false	2	General Pico	-35.6899353263	-63.6933341995	4571				4571			FALSE	gps	gps		Maracó	La Pampa	Argentina	La Pampa	Maracó	Ghost Bulimulus	Bulimulus bonariensis		Mollusca	831286	Bulimulus bonariensis		Eupulmonata	Stylommatophora	Orthalicoidea
148274477	2023/02/06 6:28 PM	2023-02-06	2023-02-06 21:28:00 UTC	America/Argentina/Cordoba	4093130	maximilianoleo	Maximiliano Leo	2023-02-07 21:00:52 UTC	2023-02-09 01:56:18 UTC	research	CC-BY-NC	https://www.inaturalist.org/observations/148274477	https://inaturalist-open-data.s3.amazonaws.com/photos/255302631/medium.jpeg				1	0	false		San Jerónimo, Santa Fe, Argentina	-32.4473739513	-60.8146451042	61				61			FALSE				San Jerónimo	Santa Fe	Argentina	Santa Fe	San Jerónimo	Ghost Bulimulus	Bulimulus bonariensis		Mollusca	831286	Bulimulus bonariensis		Eupulmonata	Stylommatophora	Orthalicoidea
148359273	2023/02/03 9:44 AM	2023-02-03	2023-02-03 12:44:00 UTC	America/Argentina/Salta	5588906	ferferrari		2023-02-09 03:16:12 UTC	2024-05-08 22:18:54 UTC	research	CC0	https://www.inaturalist.org/observations/148359273	https://inaturalist-open-data.s3.amazonaws.com/photos/255468364/medium.jpeg				1	0	false		Maracó, La Pampa, Argentina	-35.68862	-63.6900883333								FALSE				Maracó	La Pampa	Argentina	La Pampa	Maracó	Ghost Bulimulus	Bulimulus bonariensis		Mollusca	831286	Bulimulus bonariensis		Eupulmonata	Stylommatophora	Orthalicoidea
148443242	2023-02-10 08:09:56	2023-02-10	2023-02-10 11:09:56 UTC	Buenos Aires	3225167	laurabm2020	Lauu	2023-02-10 11:53:58 UTC	2023-02-10 13:02:43 UTC	research	CC-BY	https://www.inaturalist.org/observations/148443242	https://inaturalist-open-data.s3.amazonaws.com/photos/255631338/medium.jpeg				1	0	false	2	Rivadavia, AR-BA, AR	-35.4880589722	-62.989451								FALSE	gps	gps		Rivadavia	Buenos Aires	Argentina	Buenos Aires	Rivadavia	Ghost Bulimulus	Bulimulus bonariensis		Mollusca	831286	Bulimulus bonariensis		Eupulmonata	Stylommatophora	Orthalicoidea
148631513	2023-02-12 13:44:45-03:00	2023-02-12	2023-02-12 16:44:45 UTC	America/Argentina/Cordoba	127917	soti	Pedro Joaquin Soto	2023-02-12 20:08:26 UTC	2023-02-12 20:44:27 UTC	research	CC-BY-NC	https://www.inaturalist.org/observations/148631513	https://inaturalist-open-data.s3.amazonaws.com/photos/255990308/medium.jpg				1	0	false	3	Boulevar Gaillard, Colón, Entre Ríos, AR	-32.2140716667	-58.1399221667	4				4			FALSE				Colón	Entre Ríos	Argentina	Entre Ríos	Colón	Ghost Bulimulus	Bulimulus bonariensis		Mollusca	831286	Bulimulus bonariensis		Eupulmonata	Stylommatophora	Orthalicoidea
149069496	2023-02-18 17:41:07	2023-02-18	2023-02-18 20:41:07 UTC	America/Argentina/Salta	3618207	latalo	Andrea Talone Rìo	2023-02-18 20:43:16 UTC	2023-11-26 19:27:24 UTC	research	CC-BY-NC	https://www.inaturalist.org/observations/149069496	https://inaturalist-open-data.s3.amazonaws.com/photos/256813890/medium.jpeg				2	0	false	2	Gral. Pico, La Pampa, Argentina	-35.647690213	-63.7445100769	22				22			FALSE	gps	gps		Maracó	La Pampa	Argentina	La Pampa	Maracó	Bulimulus bonariensis	Bulimulus bonariensis		Mollusca	831286	Bulimulus bonariensis		Eupulmonata	Stylommatophora	Orthalicoidea
150210672	2023/01/03 8:21 AM	2023-01-03	2023-01-03 11:21:00 UTC	America/Argentina/Cordoba	6263421	lucas_fornero	Lucas Fornero	2023-03-04 14:31:29 UTC	2023-03-05 14:28:00 UTC	research	CC-BY-NC	https://www.inaturalist.org/observations/150210672	https://inaturalist-open-data.s3.amazonaws.com/photos/258964079/medium.jpg				1	0	false		Gral Obligado, Santa Fe, Argentina	-28.4366666667	-59.2738888889								FALSE				General Obligado	Santa Fe	Argentina	Santa Fe	General Obligado	Bulimulus bonariensis	Bulimulus bonariensis		Mollusca	831286	Bulimulus bonariensis		Eupulmonata	Stylommatophora	Orthalicoidea
150745443	2023-03-10 12:53:14	2023-03-10	2023-03-10 15:53:14 UTC	America/Argentina/Cordoba	2512321	tomascarper	Tomás Carranza Perales	2023-03-10 17:37:18 UTC	2023-03-12 03:37:52 UTC	research	CC-BY	https://www.inaturalist.org/observations/150745443	https://inaturalist-open-data.s3.amazonaws.com/photos/259991295/medium.jpeg				1	0	false	2	Cdad. Universitaria, Córdoba, Argentina	-31.4346940333	-64.19318345								FALSE	gps	gps		Capital	Córdoba	Argentina	Córdoba	Capital	Ghost Bulimulus	Bulimulus bonariensis		Mollusca	831286	Bulimulus bonariensis		Eupulmonata	Stylommatophora	Orthalicoidea
150953532	2023/03/09 8:28 AM	2023-03-09	2023-03-09 11:28:00 UTC	Buenos Aires	1383117	rguller	Roberto Guller	2023-03-12 18:44:13 UTC	2023-03-13 23:16:38 UTC	research	CC-BY-NC	https://www.inaturalist.org/observations/150953532	https://inaturalist-open-data.s3.amazonaws.com/photos/260383869/medium.jpg				1	0	false		Tigre, Provincia de Buenos Aires, Argentina	-34.3927542354	-58.5247610392	2				2			FALSE				Tigre	Buenos Aires	Argentina	Buenos Aires	Tigre	Ghost Bulimulus	Bulimulus bonariensis		Mollusca	831286	Bulimulus bonariensis		Eupulmonata	Stylommatophora	Orthalicoidea
150993296	2023-03-12 10:53:28	2023-03-12	2023-03-12 13:53:28 UTC	America/Argentina/Salta	2815997	msantillan		2023-03-13 01:03:54 UTC	2023-03-13 12:29:52 UTC	research	CC-BY-NC	https://www.inaturalist.org/observations/150993296	https://inaturalist-open-data.s3.amazonaws.com/photos/260458798/medium.jpeg				1	0	false	2	Toay, AR-LP, AR	-36.6783338741	-64.3920043856	6				6			FALSE	gps	gps		Toay	La Pampa	Argentina	La Pampa	Toay	Ghost Bulimulus	Bulimulus bonariensis		Mollusca	831286	Bulimulus bonariensis		Eupulmonata	Stylommatophora	Orthalicoidea
151734308	2023/03/18 9:41 AM	2023-03-18	2023-03-18 12:41:00 UTC	Buenos Aires	1454648	r-a-p	RAP	2023-03-20 15:29:42 UTC	2023-03-21 22:24:41 UTC	research	CC-BY-NC	https://www.inaturalist.org/observations/151734308	https://static.inaturalist.org/photos/261849433/medium.jpg				1	0	false		La Lucila, Buenos Aires, Argentina	-34.4918126	-58.4794414	194				194			FALSE				San Isidro	Buenos Aires	Argentina	Buenos Aires	San Isidro	Ghost Bulimulus	Bulimulus bonariensis		Mollusca	831286	Bulimulus bonariensis		Eupulmonata	Stylommatophora	Orthalicoidea
153523490	2023/03/26 9:39 AM	2023-03-26	2023-03-26 12:39:00 UTC	America/Argentina/Cordoba	144	trekman	Gustavo Fernando Durán	2023-04-05 02:39:16 UTC	2023-04-05 13:38:30 UTC	research	CC-BY-NC-SA	https://www.inaturalist.org/observations/153523490	https://inaturalist-open-data.s3.amazonaws.com/photos/265157940/medium.jpeg				1	0	false		San Jeronimo Nte., Santa Fe, Argentina	-31.5509418127	-61.0677071425	1934				1934			FALSE				Las Colonias	Santa Fe	Argentina	Santa Fe	Las Colonias	Ghost Bulimulus	Bulimulus bonariensis		Mollusca	831286	Bulimulus bonariensis		Eupulmonata	Stylommatophora	Orthalicoidea
154029792	2023/03/16 7:27 AM	2023-03-16	2023-03-16 10:27:00 UTC	America/Argentina/Cordoba	2512321	tomascarper	Tomás Carranza Perales	2023-04-09 00:54:29 UTC	2023-04-09 13:34:50 UTC	research	CC-BY	https://www.inaturalist.org/observations/154029792	https://inaturalist-open-data.s3.amazonaws.com/photos/266071006/medium.jpg				2	0	false		Parque Chateau Carreras, Córdoba, Argentina	-31.3692103039	-64.2615975145	163				163			FALSE				Capital	Córdoba	Argentina	Córdoba	Capital	Bulimulus bonariensis	Bulimulus bonariensis		Mollusca	831286	Bulimulus bonariensis		Eupulmonata	Stylommatophora	Orthalicoidea
154270511	2023-04-09 16:56:21	2023-04-09	2023-04-09 19:56:21 UTC	America/Argentina/Cordoba	3640164	luchila	Lucila Boasso	2023-04-10 14:02:11 UTC	2023-11-26 19:27:25 UTC	research	CC-BY-NC	https://www.inaturalist.org/observations/154270511	https://inaturalist-open-data.s3.amazonaws.com/photos/266545596/medium.jpeg				2	0	false	2	Clucellas, Santa Fe, Argentina	-31.4525624183	-61.7070893571	78				78			FALSE	gps	gps		Castellanos	Santa Fe	Argentina	Santa Fe	Castellanos	Bulimulus bonariensis	Bulimulus bonariensis		Mollusca	831286	Bulimulus bonariensis		Eupulmonata	Stylommatophora	Orthalicoidea
154273982	2023-04-09 15:11:22	2023-04-09	2023-04-09 18:11:22 UTC	America/Argentina/Cordoba	3640164	luchila	Lucila Boasso	2023-04-10 14:29:34 UTC	2023-04-16 02:17:19 UTC	research	CC-BY-NC	https://www.inaturalist.org/observations/154273982	https://inaturalist-open-data.s3.amazonaws.com/photos/266551539/medium.jpeg				1	0	false	2	Clucellas, Santa Fe, Argentina	-31.4525996002	-61.7070179433	139				139			FALSE	gps	gps		Castellanos	Santa Fe	Argentina	Santa Fe	Castellanos	Ghost Bulimulus	Bulimulus bonariensis		Mollusca	831286	Bulimulus bonariensis		Eupulmonata	Stylommatophora	Orthalicoidea
155040562	2023-04-15 17:22:26	2023-04-15	2023-04-15 20:22:26 UTC	Buenos Aires	2727788	sandrawilliams	sandra williams	2023-04-15 20:52:38 UTC	2023-04-15 22:56:37 UTC	research		https://www.inaturalist.org/observations/155040562	https://static.inaturalist.org/photos/267948132/medium.jpeg				1	0	false	2	San Isidro, Provincia de Buenos Aires, Argentina	-34.4518589722	-58.507133								FALSE				San Isidro	Buenos Aires	Argentina	Buenos Aires	San Isidro	Bulimulus bonariensis	Bulimulus bonariensis		Mollusca	831286	Bulimulus bonariensis		Eupulmonata	Stylommatophora	Orthalicoidea
155413496	2023-04-16 18:23:33	2023-04-16	2023-04-16 21:23:33 UTC	America/Argentina/Cordoba	1111470	leoleiva	Leonardo Adrián LEIVA	2023-04-18 01:48:02 UTC	2023-04-18 02:26:16 UTC	research	CC-BY-NC	https://www.inaturalist.org/observations/155413496	https://inaturalist-open-data.s3.amazonaws.com/photos/268643687/medium.jpeg				1	0	false	2	Las Colonias, Santa Fe, Argentina	-31.6788889392	-60.9397220984								FALSE	gps	gps	San Agustín y alrededores	Las Colonias	Santa Fe	Argentina	Santa Fe	Las Colonias	Bulimulus bonariensis	Bulimulus bonariensis		Mollusca	831286	Bulimulus bonariensis		Eupulmonata	Stylommatophora	Orthalicoidea
155496627	2022-12-03 16:34:57	2022-12-03	2022-12-03 19:34:57 UTC	America/Argentina/Cordoba	6270029	luiscapeletti	Luis Capeletti	2023-04-18 17:37:11 UTC	2023-04-18 19:01:14 UTC	research		https://www.inaturalist.org/observations/155496627	https://static.inaturalist.org/photos/268794864/medium.jpeg			Estimo que es esta especie	1	0	false	2	E3228 Chajarí, Entre Ríos, Argentina	-30.7478754224	-57.9793750495	23				23			FALSE	gps	gps		Federación	Entre Ríos	Argentina	Entre Ríos	Federación	Ghost Bulimulus	Bulimulus bonariensis		Mollusca	831286	Bulimulus bonariensis		Eupulmonata	Stylommatophora	Orthalicoidea
155673920	2023/04/15 1:30 PM	2023-04-15	2023-04-15 16:30:00 UTC	Buenos Aires	1454648	r-a-p	RAP	2023-04-19 22:57:18 UTC	2023-04-20 02:18:48 UTC	research	CC-BY-NC	https://www.inaturalist.org/observations/155673920	https://static.inaturalist.org/photos/269114325/medium.jpg				1	0	false		San Miguel del Monte, Buenos Aires, Argentina	-35.4411249	-58.8070938	3842				3842			FALSE				Monte	Buenos Aires	Argentina	Buenos Aires	Monte	Ghost Bulimulus	Bulimulus bonariensis		Mollusca	831286	Bulimulus bonariensis		Eupulmonata	Stylommatophora	Orthalicoidea
156043605	2023-04-22 10:45:26-03:00	2023-04-22	2023-04-22 13:45:26 UTC	Buenos Aires	6623706	inzaenity	inzaenity	2023-04-22 13:48:27 UTC	2023-11-26 19:27:26 UTC	research	CC-BY-NC	https://www.inaturalist.org/observations/156043605	https://inaturalist-open-data.s3.amazonaws.com/photos/269790737/medium.jpg				1	0	false	3	Perdriel, San Isidro, Buenos Aires, AR	-34.4770180322	-58.4854957174	55				55			FALSE				San Isidro	Buenos Aires	Argentina	Buenos Aires	San Isidro	Bulimulus bonariensis	Bulimulus bonariensis		Mollusca	831286	Bulimulus bonariensis		Eupulmonata	Stylommatophora	Orthalicoidea
156682671	2023-04-25 09:44:52-03:00	2023-04-25	2023-04-25 12:44:52 UTC	America/Argentina/Cordoba	142253	carancho	Leonel Roget	2023-04-26 03:13:26 UTC	2023-04-26 14:42:14 UTC	research	CC-BY	https://www.inaturalist.org/observations/156682671	https://inaturalist-open-data.s3.amazonaws.com/photos/270959105/medium.jpg				2	0	false	3	Cataratas International Airport, Iguazú, Misiones, AR	-25.7313283333	-54.4767083333	50				50			FALSE				Iguazú	Misiones	Argentina	Misiones	Iguazú	Bulimulus bonariensis	Bulimulus bonariensis		Mollusca	831286	Bulimulus bonariensis		Eupulmonata	Stylommatophora	Orthalicoidea
156832054	2023/04/02 5:00 PM	2023-04-02	2023-04-02 20:00:00 UTC	America/Argentina/Cordoba	144	trekman	Gustavo Fernando Durán	2023-04-27 02:38:39 UTC	2023-04-27 11:50:46 UTC	research	CC-BY-NC-SA	https://www.inaturalist.org/observations/156832054	https://inaturalist-open-data.s3.amazonaws.com/photos/271216127/medium.jpeg				1	0	false		San Jeronimo Nte., Santa Fe, Argentina	-31.5517623263	-61.0863194982	61				61			FALSE				Las Colonias	Santa Fe	Argentina	Santa Fe	Las Colonias	Ghost Bulimulus	Bulimulus bonariensis		Mollusca	831286	Bulimulus bonariensis		Eupulmonata	Stylommatophora	Orthalicoidea
158081643	2023-04-28 16:50:48	2023-04-28	2023-04-28 19:50:48 UTC	America/Argentina/Salta	2815997	msantillan		2023-04-30 13:35:27 UTC	2023-05-01 16:28:01 UTC	research	CC-BY-NC	https://www.inaturalist.org/observations/158081643	https://inaturalist-open-data.s3.amazonaws.com/photos/273246218/medium.jpeg				1	0	false	2	Toay, La Pampa, Argentina	-36.6781690431	-64.3918997794	16				16			FALSE	gps	gps		Toay	La Pampa	Argentina	La Pampa	Toay	Ghost Bulimulus	Bulimulus bonariensis		Mollusca	831286	Bulimulus bonariensis		Eupulmonata	Stylommatophora	Orthalicoidea
160143841	2023/04/28 11:12 AM	2023-04-28	2023-04-28 14:12:00 UTC	America/Argentina/Cordoba	144	trekman	Gustavo Fernando Durán	2023-05-06 19:41:37 UTC	2023-05-08 10:28:16 UTC	research	CC-BY-NC-SA	https://www.inaturalist.org/observations/160143841	https://inaturalist-open-data.s3.amazonaws.com/photos/276698732/medium.jpeg				1	0	false		Costanera Este, Santa Fe, Argentina	-31.636824	-60.673589	194				194			FALSE				La Capital	Santa Fe	Argentina	Santa Fe	La Capital	Bulimulus bonariensis	Bulimulus bonariensis		Mollusca	831286	Bulimulus bonariensis		Eupulmonata	Stylommatophora	Orthalicoidea
160375667	2023-05-01 15:26:00-03:00	2023-05-01	2023-05-01 18:26:00 UTC	America/Argentina/Tucuman	688093	analiab87	Analía Benavidez	2023-05-07 18:28:10 UTC	2023-11-26 19:27:15 UTC	research	CC-BY-NC	https://www.inaturalist.org/observations/160375667	https://inaturalist-open-data.s3.amazonaws.com/photos/277126048/medium.jpg				2	0	false	3	Río de Janeiro, Municipalidad de San Miguel De Tucuman, Tucumán, AR	-26.8304967446	-65.1952242514	395				395			FALSE				Capital	Tucumán	Argentina	Tucumán	Capital	Bulimulus bonariensis	Bulimulus bonariensis		Mollusca	831286	Bulimulus bonariensis		Eupulmonata	Stylommatophora	Orthalicoidea
160587066	2023/04/28 10:29 AM	2023-04-28	2023-04-28 13:29:00 UTC	America/Argentina/Cordoba	1205836	elbeltrocco	Eduardo Luis Beltrocco	2023-05-08 16:47:51 UTC	2023-05-08 17:27:48 UTC	research	CC-BY-NC	https://www.inaturalist.org/observations/160587066	https://inaturalist-open-data.s3.amazonaws.com/photos/277503004/medium.jpg				1	0	false		Santo Tomé, Santa Fe, Argentina	-31.6615445194	-60.7608695719	2				2			FALSE				La Capital	Santa Fe	Argentina	Santa Fe	La Capital	Ghost Bulimulus	Bulimulus bonariensis		Mollusca	831286	Bulimulus bonariensis		Eupulmonata	Stylommatophora	Orthalicoidea
160794162	2023/05/04 11:44 AM	2023-05-04	2023-05-04 14:44:00 UTC	Buenos Aires	1454648	r-a-p	RAP	2023-05-09 20:03:03 UTC	2023-05-09 23:15:14 UTC	research	CC-BY-NC	https://www.inaturalist.org/observations/160794162	https://static.inaturalist.org/photos/277878738/medium.jpg			IZQUIERDA	1	0	false		Lago Lugano, Buenos Aires, Argentina	-34.6811316	-58.44516	356				356			FALSE				Distrito Federal	Ciudad de Buenos Aires	Argentina	Ciudad de Buenos Aires	Distrito Federal	Ghost Bulimulus	Bulimulus bonariensis		Mollusca	831286	Bulimulus bonariensis		Eupulmonata	Stylommatophora	Orthalicoidea
161506670	2022/12/07 9:49 AM	2022-12-07	2022-12-07 12:49:00 UTC	Buenos Aires	981840	diegoarosa	Diego Alfonso Rosa	2023-05-13 23:26:15 UTC	2023-05-14 13:45:51 UTC	research	CC-BY-NC	https://www.inaturalist.org/observations/161506670	https://static.inaturalist.org/photos/279052389/medium.jpeg				2	0	false		La Lucila, Provincia de Buenos Aires, Argentina	-34.49249785	-58.48024883								FALSE				San Isidro	Buenos Aires	Argentina	Buenos Aires	San Isidro	Bulimulus bonariensis	Bulimulus bonariensis		Mollusca	831286	Bulimulus bonariensis		Eupulmonata	Stylommatophora	Orthalicoidea
161813906	2023/05/13 12:14 PM	2023-05-13	2023-05-13 15:14:00 UTC	Buenos Aires	1454648	r-a-p	RAP	2023-05-15 15:25:12 UTC	2023-05-16 12:42:15 UTC	research	CC-BY-NC	https://www.inaturalist.org/observations/161813906	https://static.inaturalist.org/photos/279724057/medium.jpg				1	0	false		Lago Lugano, Buenos Aires, Argentina	-34.6811316	-58.44516	356				356			FALSE				Distrito Federal	Ciudad de Buenos Aires	Argentina	Ciudad de Buenos Aires	Distrito Federal	Ghost Bulimulus	Bulimulus bonariensis		Mollusca	831286	Bulimulus bonariensis		Eupulmonata	Stylommatophora	Orthalicoidea
161916793	2016/02/08 6:53 PM	2016-02-08	2016-02-08 21:53:00 UTC	Buenos Aires	854602	juanmago	Juan Matías	2023-05-16 02:48:21 UTC	2023-05-16 12:42:08 UTC	research	CC-BY-NC	https://www.inaturalist.org/observations/161916793	https://inaturalist-open-data.s3.amazonaws.com/photos/279911975/medium.jpeg				1	0	false		Rivadavia, Provincia de Buenos Aires, Argentina	-35.6512588317	-63.2370333266	15				15			FALSE				Rivadavia	Buenos Aires	Argentina	Buenos Aires	Rivadavia	Ghost Bulimulus	Bulimulus bonariensis		Mollusca	831286	Bulimulus bonariensis		Eupulmonata	Stylommatophora	Orthalicoidea
162573476	2023/05/19 1:16 PM	2023-05-19	2023-05-19 16:16:00 UTC	Buenos Aires	854602	juanmago	Juan Matías	2023-05-20 00:06:31 UTC	2023-05-20 00:42:53 UTC	research	CC-BY-NC	https://www.inaturalist.org/observations/162573476	https://inaturalist-open-data.s3.amazonaws.com/photos/281114780/medium.jpeg				1	0	false		González Moreno, Provincia de Buenos Aires, Argentina	-35.5515789774	-63.3836030499	2				2			FALSE				Rivadavia	Buenos Aires	Argentina	Buenos Aires	Rivadavia	Ghost Bulimulus	Bulimulus bonariensis		Mollusca	831286	Bulimulus bonariensis		Eupulmonata	Stylommatophora	Orthalicoidea
163015766	2023/05/20 12:25 PM	2023-05-20	2023-05-20 15:25:00 UTC	America/Argentina/Cordoba	4355072	ricardomoyano	Ricardo D. Moyano	2023-05-21 23:11:50 UTC	2023-05-22 14:01:48 UTC	research	CC-BY-NC	https://www.inaturalist.org/observations/163015766	https://inaturalist-open-data.s3.amazonaws.com/photos/281905584/medium.jpeg				1	0	false		Guaraní, Misiones, Argentina	-27.2004791419	-54.0167318686	244				244			FALSE				Guaraní	Misiones	Argentina	Misiones	Guaraní	Ghost Bulimulus	Bulimulus bonariensis		Mollusca	831286	Bulimulus bonariensis		Eupulmonata	Stylommatophora	Orthalicoidea
163247665	2023/05/03 11:32 AM	2023-05-03	2023-05-03 14:32:00 UTC	America/Argentina/Cordoba	1368063	goncrisdi	Gonzalo Diaz	2023-05-23 02:57:06 UTC	2023-05-23 12:00:26 UTC	research	CC-BY-NC	https://www.inaturalist.org/observations/163247665	https://inaturalist-open-data.s3.amazonaws.com/photos/282333649/medium.jpeg				1	0	false		Pirané Department, Formosa Province, Argentina	-25.4725333333	-58.788495								FALSE				Pirané	Formosa	Argentina	Formosa	Pirané	Ghost Bulimulus	Bulimulus bonariensis		Mollusca	831286	Bulimulus bonariensis		Eupulmonata	Stylommatophora	Orthalicoidea
163356253	2023/05/04 12:16 PM	2023-05-04	2023-05-04 15:16:00 UTC	America/Argentina/Cordoba	1368063	goncrisdi	Gonzalo Diaz	2023-05-23 18:58:09 UTC	2023-05-24 11:19:42 UTC	research	CC-BY-NC	https://www.inaturalist.org/observations/163356253	https://inaturalist-open-data.s3.amazonaws.com/photos/282525575/medium.jpeg				1	0	false		Pirané Department, Formosa Province, Argentina	-25.470905	-58.7901783333								FALSE				Pirané	Formosa	Argentina	Formosa	Pirané	Ghost Bulimulus	Bulimulus bonariensis		Mollusca	831286	Bulimulus bonariensis		Eupulmonata	Stylommatophora	Orthalicoidea
163497906	2023/05/06 4:30 PM	2023-05-06	2023-05-06 19:30:00 UTC	America/Argentina/Cordoba	1368063	goncrisdi	Gonzalo Diaz	2023-05-24 15:48:52 UTC	2023-05-25 02:36:59 UTC	research	CC-BY-NC	https://www.inaturalist.org/observations/163497906	https://inaturalist-open-data.s3.amazonaws.com/photos/282785004/medium.jpeg				1	0	false		Pirané Department, Formosa Province, Argentina	-25.4685683333	-58.7949616667								FALSE				Pirané	Formosa	Argentina	Formosa	Pirané	Ghost Bulimulus	Bulimulus bonariensis		Mollusca	831286	Bulimulus bonariensis		Eupulmonata	Stylommatophora	Orthalicoidea
163521079	2023/05/23 11:43 AM	2023-05-23	2023-05-23 14:43:00 UTC	Buenos Aires	1454648	r-a-p	RAP	2023-05-24 18:13:25 UTC	2023-05-24 22:16:04 UTC	research	CC-BY-NC	https://www.inaturalist.org/observations/163521079	https://static.inaturalist.org/photos/282825897/medium.jpg				1	0	false		Lago Lugano, Buenos Aires, Argentina	-34.6811316	-58.44516	356				356			FALSE				Distrito Federal	Ciudad de Buenos Aires	Argentina	Ciudad de Buenos Aires	Distrito Federal	Ghost Bulimulus	Bulimulus bonariensis		Mollusca	831286	Bulimulus bonariensis		Eupulmonata	Stylommatophora	Orthalicoidea
163884011	2023-05-26 14:01:12	2023-05-26	2023-05-26 17:01:12 UTC	America/Argentina/Salta	3618207	latalo	Andrea Talone Rìo	2023-05-26 21:40:50 UTC	2023-05-27 17:15:51 UTC	research	CC-BY-NC	https://www.inaturalist.org/observations/163884011	https://inaturalist-open-data.s3.amazonaws.com/photos/283503467/medium.jpeg				1	0	false	2	Gral. Pico, La Pampa, Argentina	-35.6476564291	-63.7446039543	20				20			FALSE	gps	gps		Maracó	La Pampa	Argentina	La Pampa	Maracó	Bulimulus bonariensis	Bulimulus bonariensis		Mollusca	831286	Bulimulus bonariensis		Eupulmonata	Stylommatophora	Orthalicoidea
165609643	2023-05-19 12:18:55	2023-05-19	2023-05-19 15:18:55 UTC	America/Argentina/Cordoba	2653109	fergoracy	María Fernanda Goracy	2023-06-04 22:20:35 UTC	2023-06-06 18:35:14 UTC	research	CC-BY-NC	https://www.inaturalist.org/observations/165609643	https://inaturalist-open-data.s3.amazonaws.com/photos/286690396/medium.jpeg				1	0	false	2	Reserva Natural El Puente Verde / Aves Argentinas	-25.5340308395	-54.1338118538	202				202			FALSE	gps	gps		General Manuel Belgrano	Misiones	Argentina	Misiones	General Manuel Belgrano	Ghost Bulimulus	Bulimulus bonariensis		Mollusca	831286	Bulimulus bonariensis		Eupulmonata	Stylommatophora	Orthalicoidea
166118705	2023/05/23 4:14 PM	2023-05-23	2023-05-23 19:14:00 UTC	America/Argentina/Cordoba	5155200	joaquintassara	Joaquin Tassara	2023-06-07 19:15:31 UTC	2023-06-08 22:42:43 UTC	research		https://www.inaturalist.org/observations/166118705	https://static.inaturalist.org/photos/287634524/medium.png				1	0	false		Int. Ramon B. Mestre (N) 1633, Córdoba, Argentina	-31.3652733	-64.2623813	197				197			FALSE				Capital	Córdoba	Argentina	Córdoba	Capital	Bulimulus bonariensis	Bulimulus bonariensis		Mollusca	831286	Bulimulus bonariensis		Eupulmonata	Stylommatophora	Orthalicoidea
167943580	2023/06/17 2:24 PM	2023-06-17	2023-06-17 17:24:00 UTC	Buenos Aires	7013572	rubenoinst		2023-06-17 19:33:48 UTC	2023-06-17 23:28:18 UTC	research	CC-BY	https://www.inaturalist.org/observations/167943580	https://inaturalist-open-data.s3.amazonaws.com/photos/290987626/medium.jpg			Caracol Bullimulus, Reserva Natural Urbana "El Corredor", Bella Vista (prov. de Buenos Aires)	1	0	false		Bella Vista, Provincia de Buenos Aires, Argentina	-34.5722445108	-58.6694311423	8				8			FALSE				General Sarmiento	Buenos Aires	Argentina	Buenos Aires	General Sarmiento	Ghost Bulimulus	Bulimulus bonariensis		Mollusca	831286	Bulimulus bonariensis		Eupulmonata	Stylommatophora	Orthalicoidea
168233784	2023-06-18 12:31:39	2023-06-18	2023-06-18 15:31:39 UTC	America/Argentina/Cordoba	3640164	luchila	Lucila Boasso	2023-06-19 03:23:02 UTC	2023-06-19 11:22:03 UTC	research	CC-BY-NC	https://www.inaturalist.org/observations/168233784	https://inaturalist-open-data.s3.amazonaws.com/photos/291532520/medium.jpeg				2	0	false	2	Santo Tomé, Santa Fe, Argentina	-31.6696822978	-60.7633685321	114				114			FALSE	gps	gps		La Capital	Santa Fe	Argentina	Santa Fe	La Capital	Bulimulus bonariensis	Bulimulus bonariensis		Mollusca	831286	Bulimulus bonariensis		Eupulmonata	Stylommatophora	Orthalicoidea
168529870	2023/06/18 3:26 PM	2023-06-18	2023-06-18 18:26:00 UTC	America/Argentina/Cordoba	5214686	evaristoso	E Santos Ortega	2023-06-20 18:42:57 UTC	2023-06-21 22:45:34 UTC	research		https://www.inaturalist.org/observations/168529870	https://static.inaturalist.org/photos/292079985/medium.jpeg				1	0	false		Uruguay, Entre Ríos, Argentina	-32.2607033369	-59.057137831	81				81			FALSE				Uruguay	Entre Ríos	Argentina	Entre Ríos	Uruguay	Ghost Bulimulus	Bulimulus bonariensis		Mollusca	831286	Bulimulus bonariensis		Eupulmonata	Stylommatophora	Orthalicoidea
169580746	2023/01/05 8:17 AM	2023-01-05	2023-01-05 11:17:00 UTC	America/Argentina/Cordoba	6263421	lucas_fornero	Lucas Fornero	2023-06-26 13:46:42 UTC	2023-06-27 18:16:41 UTC	research	CC-BY-NC	https://www.inaturalist.org/observations/169580746	https://inaturalist-open-data.s3.amazonaws.com/photos/294020298/medium.jpeg				1	0	false		Gral Obligado, Santa Fe, Argentina	-28.5001236141	-59.2495095142	306				306			FALSE				General Obligado	Santa Fe	Argentina	Santa Fe	General Obligado	Ghost Bulimulus	Bulimulus bonariensis		Mollusca	831286	Bulimulus bonariensis		Eupulmonata	Stylommatophora	Orthalicoidea
169580751	2023/03/25 12:07 PM	2023-03-25	2023-03-25 15:07:00 UTC	America/Argentina/Cordoba	6263421	lucas_fornero	Lucas Fornero	2023-06-26 13:46:43 UTC	2023-10-19 23:22:51 UTC	research	CC-BY-NC	https://www.inaturalist.org/observations/169580751	https://inaturalist-open-data.s3.amazonaws.com/photos/294020382/medium.jpg				1	0	false		Gral Obligado, Santa Fe, Argentina	-28.4827777778	-59.3188888889								FALSE				General Obligado	Santa Fe	Argentina	Santa Fe	General Obligado	Bulimulus bonariensis	Bulimulus bonariensis		Mollusca	831286	Bulimulus bonariensis		Eupulmonata	Stylommatophora	Orthalicoidea
172500618	2023/07/12 10:00	2023-07-12	2023-07-12 13:00:00 UTC	America/Argentina/Cordoba	6599492	robgrss	Roberto Grassi	2023-07-12 13:23:32 UTC	2023-07-12 13:26:59 UTC	research		https://www.inaturalist.org/observations/172500618	https://static.inaturalist.org/photos/299467577/medium.jpeg				1	0	false		Puerto Iguazú, Misiones, Argentina	-25.605816317	-54.565768001	2				2			FALSE				Iguazú	Misiones	Argentina	Misiones	Iguazú	Ghost Bulimulus	Bulimulus bonariensis		Mollusca	831286	Bulimulus bonariensis		Eupulmonata	Stylommatophora	Orthalicoidea
172623832	2023/07/13 00:18	2023-07-13	2023-07-13 03:18:00 UTC	America/Argentina/Cordoba	6599492	robgrss	Roberto Grassi	2023-07-13 04:11:50 UTC	2023-07-14 02:34:40 UTC	research		https://www.inaturalist.org/observations/172623832	https://static.inaturalist.org/photos/299690497/medium.jpeg				1	0	false		Puerto Iguazú, Misiones, Argentina	-25.6058131008	-54.5657689924	2				2			FALSE				Iguazú	Misiones	Argentina	Misiones	Iguazú	Ghost Bulimulus	Bulimulus bonariensis		Mollusca	831286	Bulimulus bonariensis		Eupulmonata	Stylommatophora	Orthalicoidea
172623834	2023/07/13 00:19	2023-07-13	2023-07-13 03:19:00 UTC	America/Argentina/Cordoba	6599492	robgrss	Roberto Grassi	2023-07-13 04:11:50 UTC	2023-07-14 02:34:34 UTC	research		https://www.inaturalist.org/observations/172623834	https://static.inaturalist.org/photos/299690513/medium.jpeg				1	0	false		Puerto Iguazú, Misiones, Argentina	-25.6058128929	-54.5657743568	2				2			FALSE				Iguazú	Misiones	Argentina	Misiones	Iguazú	Ghost Bulimulus	Bulimulus bonariensis		Mollusca	831286	Bulimulus bonariensis		Eupulmonata	Stylommatophora	Orthalicoidea
173239955	2023-06-19 15:18:09	2023-06-19	2023-06-19 18:18:09 UTC	Buenos Aires	5261724	leogsantoro	Leonardo Santoro	2023-07-16 16:37:08 UTC	2023-07-18 11:30:48 UTC	research		https://www.inaturalist.org/observations/173239955	https://static.inaturalist.org/photos/300828133/medium.jpeg				1	0	false	2	Ramallo, Provincia de Buenos Aires, Argentina	-33.4469070278	-60.0570526111								FALSE				Ramallo	Buenos Aires	Argentina	Buenos Aires	Ramallo	Ghost Bulimulus	Bulimulus bonariensis		Mollusca	831286	Bulimulus bonariensis		Eupulmonata	Stylommatophora	Orthalicoidea
174526826	2023-07-23 20:02:32	2023-07-23	2023-07-23 23:02:32 UTC	America/Argentina/Cordoba	6813678	jordinatura_shells	JORDINATURA_SHELLS	2023-07-23 18:26:47 UTC	2023-07-24 02:05:44 UTC	research		https://www.inaturalist.org/observations/174526826	https://static.inaturalist.org/photos/303207810/medium.jpeg			Ejemplar del 2009	1	0	false	2	Pinto	-29.1447281239	-62.6545116305	1724				1724			FALSE	gps	gps		Aguirre	Santiago del Estero	Argentina	Santiago del Estero	Aguirre	Ghost Bulimulus	Bulimulus bonariensis		Mollusca	831286	Bulimulus bonariensis		Eupulmonata	Stylommatophora	Orthalicoidea
175451508	2023-07-23 17:15:36	2023-07-23	2023-07-23 20:15:36 UTC	America/Argentina/Cordoba	3640164	luchila	Lucila Boasso	2023-07-28 23:24:47 UTC	2023-07-29 21:35:25 UTC	research	CC-BY-NC	https://www.inaturalist.org/observations/175451508	https://inaturalist-open-data.s3.amazonaws.com/photos/304919938/medium.jpeg				2	0	false	2	Parque Nacional Pre Delta	-32.1216028086	-60.6340394542	193				193			FALSE	gps	gps		Diamante	Entre Ríos	Argentina	Entre Ríos	Diamante	Bulimulus bonariensis	Bulimulus bonariensis		Mollusca	831286	Bulimulus bonariensis		Eupulmonata	Stylommatophora	Orthalicoidea
176830624	2023-08-05 12:03:07-03:00	2023-08-05	2023-08-05 15:03:07 UTC	Buenos Aires	2551145	alfanova	Valentín Alfano	2023-08-05 19:34:08 UTC	2023-08-07 18:05:50 UTC	research	CC-BY-NC	https://www.inaturalist.org/observations/176830624	https://inaturalist-open-data.s3.amazonaws.com/photos/307473004/medium.jpg				1	0	false	3	Bahía Blanca, Buenos Aires, AR	-38.69093667	-62.36112	5				5			FALSE				Bahía Blanca	Buenos Aires	Argentina	Buenos Aires	Bahía Blanca	Bulimulus bonariensis	Bulimulus bonariensis		Mollusca	831286	Bulimulus bonariensis		Eupulmonata	Stylommatophora	Orthalicoidea
176850891	2023-08-05 10:57:14-03:00	2023-08-05	2023-08-05 13:57:14 UTC	Buenos Aires	5024206	nikibez	Niki Beznosko	2023-08-05 21:26:38 UTC	2023-08-08 03:30:46 UTC	research	CC-BY-NC-ND	https://www.inaturalist.org/observations/176850891	https://inaturalist-open-data.s3.amazonaws.com/photos/307510814/medium.jpg				1	0	false	3	Avenida del Trabajo, Tigre, Buenos Aires, AR	-34.5047216667	-58.6179583333	4				4			FALSE				Tigre	Buenos Aires	Argentina	Buenos Aires	Tigre	Bulimulus bonariensis	Bulimulus bonariensis		Mollusca	831286	Bulimulus bonariensis		Eupulmonata	Stylommatophora	Orthalicoidea
176863416	2023/08/05 2:28 PM	2023-08-05	2023-08-05 17:28:00 UTC	America/Argentina/Cordoba	2430991	mariazeta	María Zeta	2023-08-05 22:46:13 UTC	2023-11-26 19:27:08 UTC	research	CC-BY-SA	https://www.inaturalist.org/observations/176863416	https://inaturalist-open-data.s3.amazonaws.com/photos/307530529/medium.jpeg				2	0	false		Esperanza, Santa Fe, Argentina	-31.4645259075	-60.915189833	15				15			FALSE				Las Colonias	Santa Fe	Argentina	Santa Fe	Las Colonias	Bulimulus bonariensis	Bulimulus bonariensis		Mollusca	831286	Bulimulus bonariensis		Eupulmonata	Stylommatophora	Orthalicoidea
177019132	2023-08-06 14:51:42	2023-08-06	2023-08-06 17:51:42 UTC	Buenos Aires	3225167	laurabm2020	Lauu	2023-08-06 18:44:41 UTC	2023-08-07 17:17:31 UTC	research	CC-BY	https://www.inaturalist.org/observations/177019132	https://inaturalist-open-data.s3.amazonaws.com/photos/307823488/medium.jpeg				1	0	false	2	América, Provincia de Buenos Aires, Argentina	-35.488869	-62.977116								FALSE	gps	gps		Rivadavia	Buenos Aires	Argentina	Buenos Aires	Rivadavia	Bulimulus bonariensis	Bulimulus bonariensis		Mollusca	831286	Bulimulus bonariensis		Eupulmonata	Stylommatophora	Orthalicoidea
177641920	2023-08-06 16:51:18	2023-08-06	2023-08-06 19:51:18 UTC	America/Argentina/Salta	2815997	msantillan		2023-08-10 10:02:01 UTC	2023-08-10 12:59:45 UTC	research	CC-BY-NC	https://www.inaturalist.org/observations/177641920	https://inaturalist-open-data.s3.amazonaws.com/photos/308993224/medium.jpeg				1	0	false	2	Toay, La Pampa, Argentina	-36.6782220149	-64.3918766454	8				8			FALSE	gps	gps		Toay	La Pampa	Argentina	La Pampa	Toay	Bulimulus bonariensis	Bulimulus bonariensis		Mollusca	831286	Bulimulus bonariensis		Eupulmonata	Stylommatophora	Orthalicoidea
177681306	2023/08/05 10:56 AM	2023-08-05	2023-08-05 13:56:00 UTC	Buenos Aires	142253	carancho	Leonel Roget	2023-08-10 15:52:47 UTC	2023-08-11 12:06:43 UTC	research	CC-BY	https://www.inaturalist.org/observations/177681306	https://inaturalist-open-data.s3.amazonaws.com/photos/309058562/medium.jpeg			Safari de Invierno!	2	0	false		Don Torcuato, Provincia de Buenos Aires, Argentina	-34.5047805556	-58.6179611111	18				18			FALSE				Tigre	Buenos Aires	Argentina	Buenos Aires	Tigre	Bulimulus bonariensis	Bulimulus bonariensis		Mollusca	831286	Bulimulus bonariensis		Eupulmonata	Stylommatophora	Orthalicoidea
178090119	2023-06-10 09:04:38	2023-06-10	2023-06-10 12:04:38 UTC	America/Argentina/Salta	7094895	metalphylum	Daniel Ayola	2023-08-13 00:11:46 UTC	2023-08-13 16:34:57 UTC	research	CC-BY-NC	https://www.inaturalist.org/observations/178090119	https://inaturalist-open-data.s3.amazonaws.com/photos/309830979/medium.jpeg				1	0	false	2	Salta, Argentina	-24.7282534944	-65.4071933404	79				79			FALSE				Capital	Salta	Argentina	Salta	Capital	Bulimulus bonariensis	Bulimulus bonariensis		Mollusca	831286	Bulimulus bonariensis		Eupulmonata	Stylommatophora	Orthalicoidea
178198257	2023/08/07 5:40 PM	2023-08-07	2023-08-07 20:40:00 UTC	America/Argentina/Cordoba	1205836	elbeltrocco	Eduardo Luis Beltrocco	2023-08-13 15:59:40 UTC	2023-08-13 16:12:55 UTC	research	CC-BY-NC	https://www.inaturalist.org/observations/178198257	https://inaturalist-open-data.s3.amazonaws.com/photos/310036765/medium.jpeg				1	0	false		Santo Tomé, Santa Fe, Argentina	-31.6615624956	-60.7607367378	2				2			FALSE				La Capital	Santa Fe	Argentina	Santa Fe	La Capital	Bulimulus bonariensis	Bulimulus bonariensis		Mollusca	831286	Bulimulus bonariensis		Eupulmonata	Stylommatophora	Orthalicoidea
178391866	2023-08-14 13:39:51	2023-08-14	2023-08-14 16:39:51 UTC	America/Argentina/Salta	7094895	metalphylum	Daniel Ayola	2023-08-14 16:50:14 UTC	2023-08-15 13:08:55 UTC	research	CC-BY-NC	https://www.inaturalist.org/observations/178391866	https://inaturalist-open-data.s3.amazonaws.com/photos/310412260/medium.jpeg				1	0	false	2	4400, Salta, Argentina	-24.7280222222	-65.4063972222								FALSE	gps	gps		Capital	Salta	Argentina	Salta	Capital	Bulimulus bonariensis	Bulimulus bonariensis		Mollusca	831286	Bulimulus bonariensis		Eupulmonata	Stylommatophora	Orthalicoidea
178995241	2023-08-18 11:10:12	2023-08-18	2023-08-18 14:10:12 UTC	America/Argentina/Cordoba	1075963	enzo_ferreyra	Enzo Edgardo Ferreyra	2023-08-18 14:57:30 UTC	2023-08-18 15:26:41 UTC	research	CC-BY-NC	https://www.inaturalist.org/observations/178995241	https://static.inaturalist.org/photos/311566343/medium.jpeg				1	0	false	2	Yapeyú, Corrientes, Argentina	-29.4645812603	-56.8153134361								FALSE	gps	gps		San Martín	Corrientes	Argentina	Corrientes	San Martín	Bulimulus bonariensis	Bulimulus bonariensis		Mollusca	831286	Bulimulus bonariensis		Eupulmonata	Stylommatophora	Orthalicoidea
182834624	2023-09-07 13:57:56	2023-09-07	2023-09-07 16:57:56 UTC	America/Argentina/Salta	7094895	metalphylum	Daniel Ayola	2023-09-11 17:45:15 UTC	2023-09-13 02:17:16 UTC	research	CC-BY-NC	https://www.inaturalist.org/observations/182834624	https://inaturalist-open-data.s3.amazonaws.com/photos/318860050/medium.jpeg				1	0	false	2	Salta, Argentina	-24.72775	-65.406575								FALSE	gps	gps		Capital	Salta	Argentina	Salta	Capital	Bulimulus bonariensis	Bulimulus bonariensis		Mollusca	831286	Bulimulus bonariensis		Eupulmonata	Stylommatophora	Orthalicoidea
183065591	2021/12/11 10:25 AM	2021-12-11	2021-12-11 13:25:00 UTC	America/Argentina/Cordoba	2823932	rebecaquetglas	Rebeca Quetglas	2023-09-13 11:34:31 UTC	2023-09-13 12:47:25 UTC	research	CC0	https://www.inaturalist.org/observations/183065591	https://inaturalist-open-data.s3.amazonaws.com/photos/319315453/medium.jpg				1	0	false		Bell Ville, Córdoba, Argentina	-32.623505	-62.6947789722								FALSE				Unión	Córdoba	Argentina	Córdoba	Unión	Bulimulus bonariensis	Bulimulus bonariensis		Mollusca	831286	Bulimulus bonariensis		Eupulmonata	Stylommatophora	Orthalicoidea
183316666	2023-09-09 15:25:21	2023-09-09	2023-09-09 18:25:21 UTC	America/Argentina/Cordoba	3640164	luchila	Lucila Boasso	2023-09-15 04:43:07 UTC	2023-09-15 11:46:17 UTC	research	CC-BY-NC	https://www.inaturalist.org/observations/183316666	https://inaturalist-open-data.s3.amazonaws.com/photos/319799667/medium.jpeg				1	0	false	2	Santa Fe de la Vera Cruz, Santa Fe, Argentina	-31.6366942819	-60.6730867177	116				116			FALSE	gps	gps		La Capital	Santa Fe	Argentina	Santa Fe	La Capital	Bulimulus bonariensis	Bulimulus bonariensis		Mollusca	831286	Bulimulus bonariensis		Eupulmonata	Stylommatophora	Orthalicoidea
183358714	2019/10/24 12:09 PM	2019-10-24	2019-10-24 15:09:00 UTC	America/Argentina/Cordoba	2823932	rebecaquetglas	Rebeca Quetglas	2023-09-15 14:29:01 UTC	2023-09-15 17:14:35 UTC	research	CC0	https://www.inaturalist.org/observations/183358714	https://inaturalist-open-data.s3.amazonaws.com/photos/319880057/medium.jpg				1	0	false		Bell Ville, Córdoba, Argentina	-32.6256880498	-62.6991698286	8				8			FALSE				Unión	Córdoba	Argentina	Córdoba	Unión	Bulimulus bonariensis	Bulimulus bonariensis		Mollusca	831286	Bulimulus bonariensis		Eupulmonata	Stylommatophora	Orthalicoidea
184611948	2023-09-23 12:12:04-03:00	2023-09-23	2023-09-23 15:12:04 UTC	Buenos Aires	2551145	alfanova	Valentín Alfano	2023-09-23 23:38:54 UTC	2023-09-24 13:42:40 UTC	research	CC-BY-NC	https://www.inaturalist.org/observations/184611948	https://inaturalist-open-data.s3.amazonaws.com/photos/322280613/medium.jpg				3	0	false	3	Ruta Provincial 11, Magdalena, Buenos Aires, AR	-35.18202499	-57.34270833	20				20			FALSE				Magdalena	Buenos Aires	Argentina	Buenos Aires	Magdalena		Bulimulus bonariensis		Mollusca	831286	Bulimulus bonariensis		Eupulmonata	Stylommatophora	Orthalicoidea
184646745	2023-09-23 17:23:31-03:00	2023-09-23	2023-09-23 20:23:31 UTC	America/Argentina/Cordoba	5825420	tutitah	Julia Ariadna	2023-09-24 05:35:04 UTC	2023-09-24 13:42:46 UTC	research	CC0	https://www.inaturalist.org/observations/184646745	https://inaturalist-open-data.s3.amazonaws.com/photos/322351455/medium.jpg				1	0	false	3	Comuna Bigand, Santa Fe, AR	-33.3822583333	-61.1854166667	12				12			FALSE				Caseros	Santa Fe	Argentina	Santa Fe	Caseros	Bulimulus bonariensis	Bulimulus bonariensis		Mollusca	831286	Bulimulus bonariensis		Eupulmonata	Stylommatophora	Orthalicoidea
186089201	2023/09/16 5:36 PM	2023-09-16	2023-09-16 20:36:00 UTC	America/Argentina/Cordoba	1391118	carlossch	Carlos Schmidtutz	2023-10-03 21:33:07 UTC	2023-10-04 18:28:22 UTC	research	CC-BY-NC	https://www.inaturalist.org/observations/186089201	https://inaturalist-open-data.s3.amazonaws.com/photos/325116855/medium.jpeg				1	0	false		Reserva de Biosfera Laguna Oca, Formosa, Argentina	-26.2188403613	-58.1751623246	61				61			FALSE				Formosa	Formosa	Argentina	Formosa	Formosa	Bulimulus bonariensis	Bulimulus bonariensis		Mollusca	831286	Bulimulus bonariensis		Eupulmonata	Stylommatophora	Orthalicoidea
186089211	2023/09/16 5:46 PM	2023-09-16	2023-09-16 20:46:00 UTC	America/Argentina/Cordoba	1391118	carlossch	Carlos Schmidtutz	2023-10-03 21:33:10 UTC	2023-10-04 18:29:09 UTC	research	CC-BY-NC	https://www.inaturalist.org/observations/186089211	https://inaturalist-open-data.s3.amazonaws.com/photos/325116906/medium.jpeg				1	0	false		Reserva de Biosfera Laguna Oca, Formosa, Argentina	-26.2187633614	-58.1750335785	61				61			FALSE				Formosa	Formosa	Argentina	Formosa	Formosa	Bulimulus bonariensis	Bulimulus bonariensis		Mollusca	831286	Bulimulus bonariensis		Eupulmonata	Stylommatophora	Orthalicoidea
187207662	2023/05/12 5:11 PM	2023-05-12	2023-05-12 20:11:00 UTC	Buenos Aires	142253	carancho	Leonel Roget	2023-10-12 04:25:04 UTC	2023-11-02 13:43:45 UTC	research	CC-BY	https://www.inaturalist.org/observations/187207662	https://inaturalist-open-data.s3.amazonaws.com/photos/327337053/medium.jpeg				2	0	false		Zárate, Provincia de Buenos Aires, Argentina	-34.0055472222	-59.1590777778	12				12			FALSE				Zárate	Buenos Aires	Argentina	Buenos Aires	Zárate	Bulimulus bonariensis	Bulimulus bonariensis		Mollusca	831286	Bulimulus bonariensis		Eupulmonata	Stylommatophora	Orthalicoidea
187907466	2023-10-14 09:10:03	2023-10-14	2023-10-14 12:10:03 UTC	America/Argentina/Cordoba	1426044	gonsaro	Gonzalo Roget	2023-10-17 15:20:38 UTC	2023-11-26 19:27:11 UTC	research	CC-BY-NC	https://www.inaturalist.org/observations/187907466	https://inaturalist-open-data.s3.amazonaws.com/photos/328720899/medium.jpeg				1	0	false	2	Gral Obligado, Santa Fe, Argentina	-28.5211967997	-59.1415488								FALSE	gps	gps		General Obligado	Santa Fe	Argentina	Santa Fe	General Obligado	Bulimulus bonariensis	Bulimulus bonariensis		Mollusca	831286	Bulimulus bonariensis		Eupulmonata	Stylommatophora	Orthalicoidea
188169775	2023/10/14 9:29 AM	2023-10-14	2023-10-14 12:29:00 UTC	America/Argentina/Cordoba	2569170	demianlescano		2023-10-19 18:41:27 UTC	2023-11-26 19:27:03 UTC	research	CC-BY-NC	https://www.inaturalist.org/observations/188169775	https://inaturalist-open-data.s3.amazonaws.com/photos/329253850/medium.jpeg				2	0	false		Gral Obligado, Santa Fe, Argentina	-28.5202392167	-59.1418496606	61				61			FALSE				General Obligado	Santa Fe	Argentina	Santa Fe	General Obligado	Bulimulus bonariensis	Bulimulus bonariensis		Mollusca	831286	Bulimulus bonariensis		Eupulmonata	Stylommatophora	Orthalicoidea
188266609	2023-10-20 11:10:00-03:00	2023-10-20	2023-10-20 14:10:00 UTC	America/Argentina/Cordoba	2538474	ramiroripa	Ramiro Ripa	2023-10-20 15:38:25 UTC	2023-10-21 13:20:43 UTC	research		https://www.inaturalist.org/observations/188266609	https://static.inaturalist.org/photos/329458724/medium.jpg				1	0	false	3	Avenida Tres Fronteras, Puerto Iguazú, Misiones, AR	-25.5964133333	-54.5853533333	5				5			FALSE				Iguazú	Misiones	Argentina	Misiones	Iguazú	Bulimulus bonariensis	Bulimulus bonariensis		Mollusca	831286	Bulimulus bonariensis		Eupulmonata	Stylommatophora	Orthalicoidea
188555109	2023/10/21 3:43 PM	2023-10-21	2023-10-21 18:43:00 UTC	America/Argentina/Cordoba	5332664	nachobarragan		2023-10-22 18:43:47 UTC	2023-11-26 19:26:59 UTC	research	CC-BY-NC	https://www.inaturalist.org/observations/188555109	https://inaturalist-open-data.s3.amazonaws.com/photos/330050045/medium.jpg				1	0	false		arroyo perucho verne	-32.1666674444	-58.3437131916	977				977			FALSE				Colón	Entre Ríos	Argentina	Entre Ríos	Colón	Bulimulus bonariensis	Bulimulus bonariensis		Mollusca	831286	Bulimulus bonariensis		Eupulmonata	Stylommatophora	Orthalicoidea
188811708	2023-10-24 15:40:54	2023-10-24	2023-10-24 18:40:54 UTC	America/Argentina/Catamarca	3464188	facundo_lobos	Facundo Nicolas Marcial Lobos	2023-10-24 18:58:49 UTC	2023-11-26 19:27:01 UTC	research	CC-BY-NC	https://www.inaturalist.org/observations/188811708	https://inaturalist-open-data.s3.amazonaws.com/photos/330574905/medium.jpeg				2	0	false	2	San Fernando del Valle de Catamarca, Catamarca, Argentina	-28.4802777778	-65.7980555556								FALSE				Capital	Catamarca	Argentina	Catamarca	Capital	Bulimulus bonariensis	Bulimulus bonariensis		Mollusca	831286	Bulimulus bonariensis		Eupulmonata	Stylommatophora	Orthalicoidea
189001618	2023/10/15 4:49 PM	2023-10-15	2023-10-15 19:49:00 UTC	America/Argentina/Cordoba	1205836	elbeltrocco	Eduardo Luis Beltrocco	2023-10-26 13:05:19 UTC	2023-10-28 10:34:14 UTC	research	CC-BY-NC	https://www.inaturalist.org/observations/189001618	https://inaturalist-open-data.s3.amazonaws.com/photos/330968032/medium.jpeg				1	0	false		Gral Obligado, Santa Fe, Argentina	-28.2328066667	-59.1171883333								FALSE				General Obligado	Santa Fe	Argentina	Santa Fe	General Obligado	Bulimulus bonariensis	Bulimulus bonariensis		Mollusca	831286	Bulimulus bonariensis		Eupulmonata	Stylommatophora	Orthalicoidea
189042365	2023/10/26 2:39 PM	2023-10-26	2023-10-26 17:39:00 UTC	America/Argentina/Cordoba	1205836	elbeltrocco	Eduardo Luis Beltrocco	2023-10-26 19:47:31 UTC	2023-10-27 13:33:40 UTC	research	CC-BY-NC	https://www.inaturalist.org/observations/189042365	https://inaturalist-open-data.s3.amazonaws.com/photos/331043426/medium.jpeg				1	0	false		Santa Fe de la Vera Cruz, Santa Fe, Argentina	-31.6567357561	-60.7101674213	8				8			FALSE				La Capital	Santa Fe	Argentina	Santa Fe	La Capital	Bulimulus bonariensis	Bulimulus bonariensis		Mollusca	831286	Bulimulus bonariensis		Eupulmonata	Stylommatophora	Orthalicoidea
189229103	2023-10-20 12:48:05	2023-10-20	2023-10-20 15:48:05 UTC	Buenos Aires	2379506	seba_fornes	Sebastián Fornés	2023-10-28 14:42:06 UTC	2023-11-26 19:26:55 UTC	research	CC-BY	https://www.inaturalist.org/observations/189229103	https://inaturalist-open-data.s3.amazonaws.com/photos/331428330/medium.jpeg				1	0	false	2	Puerto Madero, CABA, Argentina	-34.5976404075	-58.3623093367	22				22			FALSE	gps	gps		Distrito Federal	Ciudad de Buenos Aires	Argentina	Ciudad de Buenos Aires	Distrito Federal	Bulimulus bonariensis	Bulimulus bonariensis		Mollusca	831286	Bulimulus bonariensis		Eupulmonata	Stylommatophora	Orthalicoidea
189349975	2023-10-28 16:37:38	2023-10-28	2023-10-28 19:37:38 UTC	Buenos Aires	3225167	laurabm2020	Lauu	2023-10-29 14:15:59 UTC	2023-10-31 02:01:28 UTC	research	CC-BY	https://www.inaturalist.org/observations/189349975	https://inaturalist-open-data.s3.amazonaws.com/photos/331677745/medium.jpeg				1	0	false	2	Rivadavia, Provincia de Buenos Aires, Argentina	-35.516061	-62.975146								FALSE	gps	gps		Rivadavia	Buenos Aires	Argentina	Buenos Aires	Rivadavia	Bulimulus bonariensis	Bulimulus bonariensis		Mollusca	831286	Bulimulus bonariensis		Eupulmonata	Stylommatophora	Orthalicoidea
190464835	2023-11-06 21:22:05	2023-11-06	2023-11-07 00:22:05 UTC	America/Argentina/Cordoba	3675845	danali	Danalí Herr	2023-11-09 04:07:34 UTC	2023-11-09 12:46:13 UTC	research	CC-BY-NC	https://www.inaturalist.org/observations/190464835	https://inaturalist-open-data.s3.amazonaws.com/photos/333896012/medium.jpeg				1	0	false	2	Santa Fe	-31.6106235168	-60.6972943246	12585				12585			FALSE	gps	gps		La Capital	Santa Fe	Argentina	Santa Fe	La Capital	Bulimulus bonariensis	Bulimulus bonariensis		Mollusca	831286	Bulimulus bonariensis		Eupulmonata	Stylommatophora	Orthalicoidea
190690046	2023-11-11 10:13:00	2023-11-11	2023-11-11 13:13:00 UTC	Buenos Aires	2653109	fergoracy	María Fernanda Goracy	2023-11-11 16:38:30 UTC	2023-11-13 00:20:21 UTC	research	CC-BY-NC	https://www.inaturalist.org/observations/190690046	https://inaturalist-open-data.s3.amazonaws.com/photos/334343873/medium.jpeg				1	0	false	2	Presidente Derqui 2505-2593, El Palomar, Provincia de Buenos Aires, Argentina	-34.6262893997	-58.6081748								FALSE	gps	gps		Morón	Buenos Aires	Argentina	Buenos Aires	Morón	Bulimulus bonariensis	Bulimulus bonariensis		Mollusca	831286	Bulimulus bonariensis		Eupulmonata	Stylommatophora	Orthalicoidea
190820494	2023-11-11 17:48:29	2023-11-11	2023-11-11 20:48:29 UTC	Buenos Aires	5476983	valeriacotone		2023-11-12 18:53:36 UTC	2023-11-12 19:00:51 UTC	research	CC-BY-NC	https://www.inaturalist.org/observations/190820494	https://inaturalist-open-data.s3.amazonaws.com/photos/334604926/medium.jpeg				1	0	false	2	Sierras Bayas, Provincia de Buenos Aires, Argentina	-36.93668791	-60.1561646909	1959				1959			FALSE	gps	gps		Olavarría	Buenos Aires	Argentina	Buenos Aires	Olavarría	Bulimulus bonariensis	Bulimulus bonariensis		Mollusca	831286	Bulimulus bonariensis		Eupulmonata	Stylommatophora	Orthalicoidea
190946665	2023/11/02 9:06 AM	2023-11-02	2023-11-02 12:06:00 UTC	America/Argentina/Cordoba	1383117	rguller	Roberto Guller	2023-11-13 23:09:25 UTC	2023-11-14 09:41:53 UTC	research	CC-BY-NC	https://www.inaturalist.org/observations/190946665	https://inaturalist-open-data.s3.amazonaws.com/photos/334852637/medium.jpg				1	0	false		Candelaria, Misiones, Argentina	-27.3325457374	-55.5202740282	2				2			FALSE				Candelaria	Misiones	Argentina	Misiones	Candelaria	Bulimulus bonariensis	Bulimulus bonariensis		Mollusca	831286	Bulimulus bonariensis		Eupulmonata	Stylommatophora	Orthalicoidea
191121565	2023-11-15 18:19:31	2023-11-15	2023-11-15 21:19:31 UTC	America/Argentina/Cordoba	5296144	dariodalmas		2023-11-15 21:19:58 UTC	2023-11-15 22:11:49 UTC	research	CC-BY-NC	https://www.inaturalist.org/observations/191121565	https://inaturalist-open-data.s3.amazonaws.com/photos/335205432/medium.jpeg				2	0	false	2	Cayastá, Santa Fe, Argentina	-31.199909	-60.1657859722								FALSE	gps	gps		Garay	Santa Fe	Argentina	Santa Fe	Garay	Bulimulus bonariensis	Bulimulus bonariensis		Mollusca	831286	Bulimulus bonariensis		Eupulmonata	Stylommatophora	Orthalicoidea
191130567	2023/11/12 12:25 PM	2023-11-12	2023-11-12 15:25:00 UTC	Buenos Aires	972932	ejnadal	Eduardo Nadal	2023-11-15 23:15:36 UTC	2023-11-16 00:06:35 UTC	research	CC-BY-NC	https://www.inaturalist.org/observations/191130567	https://inaturalist-open-data.s3.amazonaws.com/photos/335223367/medium.jpg				1	0	false		Puerto Madero, CABA, Argentina	-34.5980466667	-58.36204								FALSE				Distrito Federal	Ciudad de Buenos Aires	Argentina	Ciudad de Buenos Aires	Distrito Federal	Bulimulus bonariensis	Bulimulus bonariensis		Mollusca	831286	Bulimulus bonariensis		Eupulmonata	Stylommatophora	Orthalicoidea
191374323	2023-11-15 22:38:19	2023-11-15	2023-11-16 01:38:19 UTC	Buenos Aires	6800303	jennifer02		2023-11-18 16:13:22 UTC	2023-11-19 01:24:34 UTC	research	CC-BY-NC	https://www.inaturalist.org/observations/191374323	https://inaturalist-open-data.s3.amazonaws.com/photos/335712183/medium.jpeg				1	0	false	2	La Plata, Provincia de Buenos Aires, Argentina	-34.9204881919	-57.9535658285	5241				5241			FALSE	gps	gps		La Plata	Buenos Aires	Argentina	Buenos Aires	La Plata	Bulimulus bonariensis	Bulimulus bonariensis		Mollusca	831286	Bulimulus bonariensis		Eupulmonata	Stylommatophora	Orthalicoidea
191749141	2023-11-22 06:52:32	2023-11-22	2023-11-22 09:52:32 UTC	America/Argentina/Cordoba	1111470	leoleiva	Leonardo Adrián LEIVA	2023-11-22 10:23:04 UTC	2023-11-22 14:28:11 UTC	research	CC-BY-NC	https://www.inaturalist.org/observations/191749141	https://inaturalist-open-data.s3.amazonaws.com/photos/336462744/medium.jpeg				1	0	false	2	3016, Santo Tomé, Santa Fe, Argentina	-31.6681191382	-60.7643669844	4				4			FALSE	gps	gps		La Capital	Santa Fe	Argentina	Santa Fe	La Capital	Bulimulus bonariensis	Bulimulus bonariensis		Mollusca	831286	Bulimulus bonariensis		Eupulmonata	Stylommatophora	Orthalicoidea
191809510	2023-11-22 16:05:50	2023-11-22	2023-11-22 19:05:50 UTC	America/Argentina/Cordoba	3675845	danali	Danalí Herr	2023-11-23 01:34:03 UTC	2023-11-23 15:11:02 UTC	research	CC-BY-NC	https://www.inaturalist.org/observations/191809510	https://inaturalist-open-data.s3.amazonaws.com/photos/336583691/medium.jpeg				2	0	false	2	Santa Fe de la Vera Cruz, Santa Fe, Argentina	-31.6106235168	-60.6972943246	12585				12585			FALSE	gps	gps		La Capital	Santa Fe	Argentina	Santa Fe	La Capital	Bulimulus bonariensis	Bulimulus bonariensis		Mollusca	831286	Bulimulus bonariensis		Eupulmonata	Stylommatophora	Orthalicoidea
191947122	2023-11-23 09:54:00-03:00	2023-11-23	2023-11-23 12:54:00 UTC	Buenos Aires	7493734	jacquescousteau2	André Terwei	2023-11-24 14:18:35 UTC	2023-11-24 16:09:15 UTC	research	CC-BY-NC	https://www.inaturalist.org/observations/191947122	https://inaturalist-open-data.s3.amazonaws.com/photos/336855665/medium.jpg				1	0	false	3	General Alvarado, Buenos Aires, AR	-38.34283	-57.9791216667	4				4			FALSE				General Alvarado	Buenos Aires	Argentina	Buenos Aires	General Alvarado	Bulimulus bonariensis	Bulimulus bonariensis		Mollusca	831286	Bulimulus bonariensis		Eupulmonata	Stylommatophora	Orthalicoidea
192563729	2023-11-29 13:55:05	2023-11-29	2023-11-29 16:55:05 UTC	Buenos Aires	5955568	ines280	Ines Otero	2023-11-29 17:31:49 UTC	2023-11-29 17:58:27 UTC	research		https://www.inaturalist.org/observations/192563729	https://static.inaturalist.org/photos/338071748/medium.jpeg				1	0	false	2	Buenos Aires, AR	-35.4140456915	-57.9107051179	19				28677	obscured		TRUE	gps	gps		Chascomús	Buenos Aires	Argentina	Buenos Aires	Chascomús	Ghost Bulimulus	Bulimulus bonariensis		Mollusca	831286	Bulimulus bonariensis		Eupulmonata	Stylommatophora	Orthalicoidea
192606764	2023/11/26 5:00 PM	2023-11-26	2023-11-26 20:00:00 UTC	America/Argentina/Cordoba	144	trekman	Gustavo Fernando Durán	2023-11-30 03:37:41 UTC	2023-11-30 09:57:35 UTC	research	CC-BY-NC-SA	https://www.inaturalist.org/observations/192606764	https://inaturalist-open-data.s3.amazonaws.com/photos/338078756/medium.jpeg				1	0	false		San Jeronimo Nte., Santa Fe, Argentina	-31.5513198521	-61.0862983864	111				111			FALSE				Las Colonias	Santa Fe	Argentina	Santa Fe	Las Colonias	Bulimulus bonariensis	Bulimulus bonariensis		Mollusca	831286	Bulimulus bonariensis		Eupulmonata	Stylommatophora	Orthalicoidea
192944769	2023-12-02 11:05:55	2023-12-02	2023-12-02 14:05:55 UTC	Buenos Aires	1660164	el_druida	Iván Eroles	2023-12-03 17:31:32 UTC	2023-12-04 14:27:04 UTC	research	CC-BY-NC	https://www.inaturalist.org/observations/192944769	https://inaturalist-open-data.s3.amazonaws.com/photos/338831133/medium.jpeg				1	0	false	2	Presidente Derqui 2505-2593, El Palomar, Provincia de Buenos Aires, Argentina	-34.6268027778	-58.6067833333								FALSE	gps	gps		Morón	Buenos Aires	Argentina	Buenos Aires	Morón	Bulimulus bonariensis	Bulimulus bonariensis		Mollusca	831286	Bulimulus bonariensis		Eupulmonata	Stylommatophora	Orthalicoidea
193058717	2023-12-04 12:00:30	2023-12-04	2023-12-04 15:00:30 UTC	America/Argentina/Cordoba	3660407	txurruarin	Isaias Maximiliano Churruarin	2023-12-04 19:36:40 UTC	2023-12-04 20:03:23 UTC	research	CC-BY-NC	https://www.inaturalist.org/observations/193058717	https://inaturalist-open-data.s3.amazonaws.com/photos/339065198/medium.jpeg				1	0	false	2	Nueve de Julio, Santa Fe, Argentina	-29.0602853377	-61.6586198285	18				18			FALSE	gps	gps		Nueve de Julio	Santa Fe	Argentina	Santa Fe	Nueve de Julio	Bulimulus bonariensis	Bulimulus bonariensis		Mollusca	831286	Bulimulus bonariensis		Eupulmonata	Stylommatophora	Orthalicoidea
193255879	2023-12-03 12:45:08	2023-12-03	2023-12-03 15:45:08 UTC	America/Argentina/Cordoba	1447711	robertgodoy	Roberto Godoy	2023-12-07 00:22:26 UTC	2023-12-07 02:31:22 UTC	research		https://www.inaturalist.org/observations/193255879	https://inaturalist-open-data.s3.amazonaws.com/photos/339462322/medium.jpeg				1	0	false	2	Rosario del Tala, Entre Ríos, Argentina	-32.3113997546	-59.1392628103	8				8			FALSE	gps	gps		Tala	Entre Ríos	Argentina	Entre Ríos	Tala	Bulimulus bonariensis	Bulimulus bonariensis		Mollusca	831286	Bulimulus bonariensis		Eupulmonata	Stylommatophora	Orthalicoidea
193509371	2023-12-09 08:00:41	2023-12-09	2023-12-09 11:00:41 UTC	Buenos Aires	1426044	gonsaro	Gonzalo Roget	2023-12-09 18:10:46 UTC	2023-12-09 18:29:15 UTC	research	CC-BY-NC	https://www.inaturalist.org/observations/193509371	https://inaturalist-open-data.s3.amazonaws.com/photos/339938533/medium.jpeg				1	0	false	2	Chivilcoy, Provincia de Buenos Aires, Argentina	-35.0871581997	-59.9203467								FALSE	gps	gps	Ramón Biaus	Chivilcoy	Buenos Aires	Argentina	Buenos Aires	Chivilcoy	Bulimulus bonariensis	Bulimulus bonariensis		Mollusca	831286	Bulimulus bonariensis		Eupulmonata	Stylommatophora	Orthalicoidea
193707126	2023-12-10 10:42:53	2023-12-10	2023-12-10 13:42:53 UTC	Buenos Aires	2585272	berlartigau	Bernardo Lartigau	2023-12-11 13:42:09 UTC	2023-12-15 22:15:51 UTC	research	CC-BY-NC	https://www.inaturalist.org/observations/193707126	https://inaturalist-open-data.s3.amazonaws.com/photos/340305660/medium.jpeg				2	0	false	2	San Fernando (1), AR-BA, AR	-34.13794263	-58.64989328	5				5			FALSE				San Fernando (1)	Buenos Aires	Argentina	Buenos Aires	San Fernando (1)	Bulimulus bonariensis	Bulimulus bonariensis		Mollusca	831286	Bulimulus bonariensis		Eupulmonata	Stylommatophora	Orthalicoidea
193983338	2023/12/14 3:22 PM	2023-12-14	2023-12-14 18:22:00 UTC	Buenos Aires	4274616	cesarp2903		2023-12-14 23:48:56 UTC	2023-12-15 04:01:22 UTC	research	CC-BY-NC	https://www.inaturalist.org/observations/193983338	https://inaturalist-open-data.s3.amazonaws.com/photos/340861878/medium.jpg				1	0	false		Puerto Madero, CABA, Argentina	-34.6176460311	-58.3498086554	488				488			FALSE				Distrito Federal	Ciudad de Buenos Aires	Argentina	Ciudad de Buenos Aires	Distrito Federal	Bulimulus bonariensis	Bulimulus bonariensis		Mollusca	831286	Bulimulus bonariensis		Eupulmonata	Stylommatophora	Orthalicoidea
193992723	2023-12-08 11:12:58	2023-12-08	2023-12-08 14:12:58 UTC	America/Argentina/Cordoba	3640164	luchila	Lucila Boasso	2023-12-15 02:35:52 UTC	2023-12-15 03:56:27 UTC	research	CC-BY-NC	https://www.inaturalist.org/observations/193992723	https://inaturalist-open-data.s3.amazonaws.com/photos/340880868/medium.jpeg				1	0	false	2	Clucellas, Santa Fe, Argentina	-31.4484823278	-61.706440933	220				220			FALSE	gps	gps		Castellanos	Santa Fe	Argentina	Santa Fe	Castellanos	Bulimulus bonariensis	Bulimulus bonariensis		Mollusca	831286	Bulimulus bonariensis		Eupulmonata	Stylommatophora	Orthalicoidea
194158094	2023-12-16 12:48:04	2023-12-16	2023-12-16 15:48:04 UTC	Buenos Aires	6346728	nico456	Nicolas Orellana	2023-12-17 02:28:22 UTC	2023-12-17 02:29:19 UTC	research		https://www.inaturalist.org/observations/194158094	https://static.inaturalist.org/photos/341209451/medium.jpeg				1	0	false	2	Brandsen, Provincia de Buenos Aires, Argentina	-35.172277	-58.0586259722								FALSE	gps	gps		Brandsen	Buenos Aires	Argentina	Buenos Aires	Brandsen	Bulimulus bonariensis	Bulimulus bonariensis		Mollusca	831286	Bulimulus bonariensis		Eupulmonata	Stylommatophora	Orthalicoidea
194193628	2023-12-17 11:45:09	2023-12-17	2023-12-17 14:45:09 UTC	America/Argentina/Cordoba	1111470	leoleiva	Leonardo Adrián LEIVA	2023-12-17 14:55:43 UTC	2023-12-18 13:55:24 UTC	research	CC-BY-NC	https://www.inaturalist.org/observations/194193628	https://inaturalist-open-data.s3.amazonaws.com/photos/341284852/medium.jpeg				2	0	false	2	San Agustin, Santa Fe, Argentina	-31.6853281379	-60.9411285818	4				4			FALSE	gps	gps	San Agustín y alrededores	Las Colonias	Santa Fe	Argentina	Santa Fe	Las Colonias	Bulimulus bonariensis	Bulimulus bonariensis		Mollusca	831286	Bulimulus bonariensis		Eupulmonata	Stylommatophora	Orthalicoidea
194648737	2023-12-23 09:31:29	2023-12-23	2023-12-23 12:31:29 UTC	America/Argentina/Cordoba	6881806	sofialopez9		2023-12-23 12:32:14 UTC	2023-12-24 17:29:02 UTC	research	CC-BY-NC	https://www.inaturalist.org/observations/194648737	https://inaturalist-open-data.s3.amazonaws.com/photos/342206914/medium.jpeg				3	0	false	2	Roque Sáenz Peña, Rosario, Santa Fe, Argentina	-33.01014095	-60.6250334	5				5			FALSE				Rosario	Santa Fe	Argentina	Santa Fe	Rosario	Bulimulus bonariensis	Bulimulus bonariensis		Mollusca	831286	Bulimulus bonariensis		Eupulmonata	Stylommatophora	Orthalicoidea
194678129	2023-12-23 17:12:04	2023-12-23	2023-12-23 20:12:04 UTC	America/Argentina/Cordoba	5567453	gracieladangelo		2023-12-23 20:15:17 UTC	2023-12-24 13:14:43 UTC	research	CC-BY-NC	https://www.inaturalist.org/observations/194678129	https://inaturalist-open-data.s3.amazonaws.com/photos/342266808/medium.jpeg				1	0	false	2	11484, Santo Tomé, Santa Fe, Argentina	-31.6857356944	-60.7581748889								FALSE	gps	gps		La Capital	Santa Fe	Argentina	Santa Fe	La Capital	Bulimulus bonariensis	Bulimulus bonariensis		Mollusca	831286	Bulimulus bonariensis		Eupulmonata	Stylommatophora	Orthalicoidea
194744684	2023-12-23 09:33:07	2023-12-23	2023-12-23 12:33:07 UTC	America/Argentina/Cordoba	3878692	pedrogarabaya		2023-12-24 15:41:37 UTC	2023-12-25 17:58:16 UTC	research		https://www.inaturalist.org/observations/194744684	https://inaturalist-open-data.s3.amazonaws.com/photos/342403730/medium.jpeg				2	0	false	2	Roque Sáenz Peña, Rosario, Santa Fe, Argentina	-33.0097293604	-60.6244183704	156				156			FALSE	gps	gps		Rosario	Santa Fe	Argentina	Santa Fe	Rosario	Bulimulus bonariensis	Bulimulus bonariensis		Mollusca	831286	Bulimulus bonariensis		Eupulmonata	Stylommatophora	Orthalicoidea
195005638	2023-12-27 16:52:03-03:00	2023-12-27	2023-12-27 19:52:03 UTC	America/Argentina/Salta	2758402	anibalakd	Anibal Prina	2023-12-27 19:54:13 UTC	2023-12-28 12:42:38 UTC	research	CC-BY-NC	https://www.inaturalist.org/observations/195005638	https://inaturalist-open-data.s3.amazonaws.com/photos/342944409/medium.jpg				2	0	false	3	Juan Carlos Neveu, Santa Rosa, La Pampa, AR	-36.6354616667	-64.261055	8				8			FALSE				Capital	La Pampa	Argentina	La Pampa	Capital	Bulimulus bonariensis	Bulimulus bonariensis		Mollusca	831286	Bulimulus bonariensis		Eupulmonata	Stylommatophora	Orthalicoidea
195095532	2023/12/26 11:33 AM	2023-12-26	2023-12-26 14:33:00 UTC	America/Argentina/Cordoba	1205836	elbeltrocco	Eduardo Luis Beltrocco	2023-12-28 19:13:34 UTC	2023-12-28 20:09:29 UTC	research	CC-BY-NC	https://www.inaturalist.org/observations/195095532	https://inaturalist-open-data.s3.amazonaws.com/photos/343126312/medium.jpg				1	0	false		Santa Fe de la Vera Cruz, Santa Fe, Argentina	-31.6069512914	-60.7243070781	2				2			FALSE				La Capital	Santa Fe	Argentina	Santa Fe	La Capital	Bulimulus bonariensis	Bulimulus bonariensis		Mollusca	831286	Bulimulus bonariensis		Eupulmonata	Stylommatophora	Orthalicoidea
195114857	2023-12-28 19:37:18	2023-12-28	2023-12-28 22:37:18 UTC	America/Argentina/Cordoba	5359779	fernandocuello	Fernando E. Cuello	2023-12-28 22:40:25 UTC	2023-12-29 15:48:41 UTC	research	CC-BY-NC	https://www.inaturalist.org/observations/195114857	https://inaturalist-open-data.s3.amazonaws.com/photos/343165027/medium.jpeg				1	0	false	2	Venado Tuerto, Santa Fe, Argentina	-33.7255266868	-61.9817442074	10				10			FALSE				General López	Santa Fe	Argentina	Santa Fe	General López	Bulimulus bonariensis	Bulimulus bonariensis		Mollusca	831286	Bulimulus bonariensis		Eupulmonata	Stylommatophora	Orthalicoidea
195117335	2023-12-28 18:46:43-03:00	2023-12-28	2023-12-28 21:46:43 UTC	America/Argentina/Tucuman	688093	analiab87	Analía Benavidez	2023-12-28 23:07:13 UTC	2023-12-29 18:04:03 UTC	research	CC-BY-NC	https://www.inaturalist.org/observations/195117335	https://inaturalist-open-data.s3.amazonaws.com/photos/343169738/medium.jpg				1	0	false	3	Río de Janeiro, Municipalidad de San Miguel De Tucuman, Tucumán, AR	-26.8306821308	-65.1952226231	35				35			FALSE				Capital	Tucumán	Argentina	Tucumán	Capital	Bulimulus bonariensis	Bulimulus bonariensis		Mollusca	831286	Bulimulus bonariensis		Eupulmonata	Stylommatophora	Orthalicoidea
195567225	2024-01-02 10:07:33	2024-01-02	2024-01-02 13:07:33 UTC	America/Argentina/Cordoba	3979096	mfkielma	María Fernanda Kielmanowicz	2024-01-02 13:08:57 UTC	2024-01-24 21:51:23 UTC	research	CC-BY-NC	https://www.inaturalist.org/observations/195567225	https://inaturalist-open-data.s3.amazonaws.com/photos/344089344/medium.jpeg				1	0	false	2	Victoria, Entre Ríos, Argentina	-32.4063948775	-60.3809086606	9				9			FALSE				Victoria	Entre Ríos	Argentina	Entre Ríos	Victoria	Bulimulus bonariensis	Bulimulus bonariensis		Mollusca	831286	Bulimulus bonariensis		Eupulmonata	Stylommatophora	Orthalicoidea
195714987	2023-12-17 19:33:58	2023-12-17	2023-12-17 22:33:58 UTC	America/Argentina/Cordoba	6827407	lucho1976	Luis Bruno	2024-01-04 01:53:06 UTC	2024-01-04 04:29:52 UTC	research		https://www.inaturalist.org/observations/195714987	https://static.inaturalist.org/photos/344387419/medium.jpeg				1	0	false	2	S3080 Esperanza, Santa Fe, Argentina	-31.4491381861	-60.9246551245	44				44			FALSE				Las Colonias	Santa Fe	Argentina	Santa Fe	Las Colonias	Ghost Bulimulus	Bulimulus bonariensis		Mollusca	831286	Bulimulus bonariensis		Eupulmonata	Stylommatophora	Orthalicoidea
196146491	2024-01-07 16:08:27-03:00	2024-01-07	2024-01-07 19:08:27 UTC	Buenos Aires	2942920	fchieffo	Facundo Chieffo	2024-01-08 20:21:06 UTC	2024-01-08 22:13:22 UTC	research	CC-BY	https://www.inaturalist.org/observations/196146491	https://inaturalist-open-data.s3.amazonaws.com/photos/345251728/medium.jpg				1	0	false	3	Reserva Ecológica Lago Lugano, Buenos Aires, CABA, AR	-34.6791833333	-58.4424366667	43				43			FALSE				Distrito Federal	Ciudad de Buenos Aires	Argentina	Ciudad de Buenos Aires	Distrito Federal	Bulimulus bonariensis	Bulimulus bonariensis		Mollusca	831286	Bulimulus bonariensis		Eupulmonata	Stylommatophora	Orthalicoidea
196323203	2024/01/07 12:15 PM	2024-01-07	2024-01-07 15:15:00 UTC	America/Argentina/Cordoba	144	trekman	Gustavo Fernando Durán	2024-01-11 03:00:20 UTC	2024-01-11 13:24:12 UTC	research	CC-BY-NC-SA	https://www.inaturalist.org/observations/196323203	https://inaturalist-open-data.s3.amazonaws.com/photos/345598695/medium.jpeg				1	0	false		Las Colonias, Santa Fe, Argentina	-31.5450676369	-61.0658286625	1148				1148			FALSE				Las Colonias	Santa Fe	Argentina	Santa Fe	Las Colonias	Bulimulus bonariensis	Bulimulus bonariensis		Mollusca	831286	Bulimulus bonariensis		Eupulmonata	Stylommatophora	Orthalicoidea
196342726	2024-01-11 07:21:49	2024-01-11	2024-01-11 10:21:49 UTC	America/Argentina/Cordoba	7720716	rodrigo_valentin	Rodrigo Valentin Piazza	2024-01-11 10:51:52 UTC	2024-02-03 15:12:26 UTC	research		https://www.inaturalist.org/observations/196342726	https://static.inaturalist.org/photos/345649089/medium.jpeg				1	0	false	2	Bella Vista, Corrientes, Argentina	-28.5102133686	-59.045719346	9				9			FALSE				Bella Vista	Corrientes	Argentina	Corrientes	Bella Vista	Ghost Bulimulus	Bulimulus bonariensis		Mollusca	831286	Bulimulus bonariensis		Eupulmonata	Stylommatophora	Orthalicoidea
196471438	2024-01-07 20:05:00	2024-01-07	2024-01-07 23:05:00 UTC	America/Argentina/Cordoba	3640164	luchila	Lucila Boasso	2024-01-13 01:43:15 UTC	2024-01-14 18:51:55 UTC	research	CC-BY-NC	https://www.inaturalist.org/observations/196471438	https://inaturalist-open-data.s3.amazonaws.com/photos/345912612/medium.jpeg				2	0	false	2	Avenida Almirante Brown S/N, Santa Fe, Argentina	-31.6209654508	-60.6766014174	570				570			FALSE	gps	gps		La Capital	Santa Fe	Argentina	Santa Fe	La Capital	Bulimulus bonariensis	Bulimulus bonariensis		Mollusca	831286	Bulimulus bonariensis		Eupulmonata	Stylommatophora	Orthalicoidea
196650534	2024-01-11 18:57:42-03:00	2024-01-11	2024-01-11 21:57:42 UTC	America/Argentina/Tucuman	688093	analiab87	Analía Benavidez	2024-01-14 10:12:09 UTC	2024-01-14 15:52:06 UTC	research	CC-BY-NC	https://www.inaturalist.org/observations/196650534	https://inaturalist-open-data.s3.amazonaws.com/photos/346151411/medium.jpg				1	0	false	3	Río de Janeiro, Municipalidad de San Miguel De Tucuman, Tucumán, AR	-26.8305842241	-65.1952075998	35				35			FALSE				Capital	Tucumán	Argentina	Tucumán	Capital	Bulimulus bonariensis	Bulimulus bonariensis		Mollusca	831286	Bulimulus bonariensis		Eupulmonata	Stylommatophora	Orthalicoidea
196707740	2023-12-18 17:25:20	2023-12-18	2023-12-18 20:25:20 UTC	Buenos Aires	2379506	seba_fornes	Sebastián Fornés	2024-01-14 23:14:37 UTC	2024-01-15 14:19:37 UTC	research	CC-BY	https://www.inaturalist.org/observations/196707740	https://inaturalist-open-data.s3.amazonaws.com/photos/346262837/medium.jpeg				1	0	false	2	Puerto Madero, CABA, Argentina	-34.5985826177	-58.3623197302	12				12			FALSE	gps	gps		Distrito Federal	Ciudad de Buenos Aires	Argentina	Ciudad de Buenos Aires	Distrito Federal	Bulimulus bonariensis	Bulimulus bonariensis		Mollusca	831286	Bulimulus bonariensis		Eupulmonata	Stylommatophora	Orthalicoidea
196730052	2024-01-15 01:00:06	2024-01-15	2024-01-15 04:00:06 UTC	America/Argentina/Cordoba	1111470	leoleiva	Leonardo Adrián LEIVA	2024-01-15 04:19:43 UTC	2024-01-15 11:28:22 UTC	research	CC-BY-NC	https://www.inaturalist.org/observations/196730052	https://inaturalist-open-data.s3.amazonaws.com/photos/346309948/medium.jpeg				1	0	false	2	Las Colonias, Santa Fe, Argentina	-31.6878515977	-60.933897011	4				4			FALSE	gps	gps	San Agustín y alrededores	Las Colonias	Santa Fe	Argentina	Santa Fe	Las Colonias	Bulimulus bonariensis	Bulimulus bonariensis		Mollusca	831286	Bulimulus bonariensis		Eupulmonata	Stylommatophora	Orthalicoidea
196866865	2024-01-16 18:19:27	2024-01-16	2024-01-16 21:19:27 UTC	America/Argentina/Cordoba	1756788	sebawill	Sebastián	2024-01-16 21:28:59 UTC	2024-01-16 23:17:09 UTC	research	CC-BY-NC	https://www.inaturalist.org/observations/196866865	https://inaturalist-open-data.s3.amazonaws.com/photos/346584976/medium.jpeg				1	0	false	2	Colón, Entre Ríos, Argentina	-31.8252856	-58.3214073997								FALSE	gps	gps		Colón	Entre Ríos	Argentina	Entre Ríos	Colón	Bulimulus bonariensis	Bulimulus bonariensis		Mollusca	831286	Bulimulus bonariensis		Eupulmonata	Stylommatophora	Orthalicoidea
196919614	2024-01-17 12:23:37	2024-01-17	2024-01-17 15:23:37 UTC	America/Argentina/Jujuy	6818773	vicogm	Vico Muñoz	2024-01-17 15:42:59 UTC	2024-01-18 00:48:38 UTC	research	CC-BY-NC	https://www.inaturalist.org/observations/196919614	https://inaturalist-open-data.s3.amazonaws.com/photos/346693065/medium.jpeg				1	0	false	2	Palpalá, Jujuy, Argentina	-24.2706641944	-65.2130966111								FALSE	gps	gps		Palpalá	Jujuy	Argentina	Jujuy	Palpalá	Bulimulus bonariensis	Bulimulus bonariensis		Mollusca	831286	Bulimulus bonariensis		Eupulmonata	Stylommatophora	Orthalicoidea
197042841	2024-01-17 18:19:10	2024-01-17	2024-01-17 21:19:10 UTC	America/Argentina/Salta	7094895	metalphylum	Daniel Ayola	2024-01-19 05:35:46 UTC	2024-01-19 20:40:05 UTC	research	CC-BY-NC	https://www.inaturalist.org/observations/197042841	https://inaturalist-open-data.s3.amazonaws.com/photos/346945086/medium.jpeg				1	0	false	2	Capital, Salta, Argentina	-24.7333888889	-65.4238555556								FALSE				Capital	Salta	Argentina	Salta	Capital	Bulimulus bonariensis	Bulimulus bonariensis		Mollusca	831286	Bulimulus bonariensis		Eupulmonata	Stylommatophora	Orthalicoidea
197160863	2023/12/10 9:19 AM	2023-12-10	2023-12-10 12:19:00 UTC	America/Argentina/Cordoba	144	trekman	Gustavo Fernando Durán	2024-01-20 19:25:45 UTC	2024-01-21 00:43:08 UTC	research	CC-BY-NC-SA	https://www.inaturalist.org/observations/197160863	https://inaturalist-open-data.s3.amazonaws.com/photos/347176574/medium.jpeg				1	0	false		San Jeronimo Nte., Santa Fe, Argentina	-31.5527338	-61.077921	1934				1934			FALSE				Las Colonias	Santa Fe	Argentina	Santa Fe	Las Colonias	Bulimulus bonariensis	Bulimulus bonariensis		Mollusca	831286	Bulimulus bonariensis		Eupulmonata	Stylommatophora	Orthalicoidea
197219486	2024-01-21 07:39:49-03:00	2024-01-21	2024-01-21 10:39:49 UTC	Buenos Aires	127917	soti	Pedro Joaquin Soto	2024-01-21 12:27:16 UTC	2024-01-21 13:03:44 UTC	research	CC-BY-NC	https://www.inaturalist.org/observations/197219486	https://inaturalist-open-data.s3.amazonaws.com/photos/347301093/medium.jpg				1	0	false	3	Calle 663, Chacabuco, Provincia de Buenos Aires, AR	-34.6205133333	-60.4460533333	4				4			FALSE				Chacabuco	Buenos Aires	Argentina	Buenos Aires	Chacabuco	Bulimulus bonariensis	Bulimulus bonariensis		Mollusca	831286	Bulimulus bonariensis		Eupulmonata	Stylommatophora	Orthalicoidea
197257565	2024-01-21 18:30:01	2024-01-21	2024-01-21 21:30:01 UTC	America/Argentina/Cordoba	2539588	lsorbellini16	lsorbellini16	2024-01-21 21:31:32 UTC	2024-01-22 12:54:47 UTC	research		https://www.inaturalist.org/observations/197257565	https://static.inaturalist.org/photos/347376008/medium.jpeg				1	0	false	2	Rafaela, Santa Fe, Argentina	-31.2836254314	-61.5192321315	5				5			FALSE	gps	gps		Castellanos	Santa Fe	Argentina	Santa Fe	Castellanos	Ghost Bulimulus	Bulimulus bonariensis		Mollusca	831286	Bulimulus bonariensis		Eupulmonata	Stylommatophora	Orthalicoidea
197359113	2023/12/10 12:03 PM	2023-12-10	2023-12-10 15:03:00 UTC	America/Argentina/Cordoba	144	trekman	Gustavo Fernando Durán	2024-01-23 03:12:00 UTC	2024-01-25 10:59:24 UTC	research	CC-BY-NC-SA	https://www.inaturalist.org/observations/197359113	https://inaturalist-open-data.s3.amazonaws.com/photos/347515232/medium.jpeg				1	0	false		San Jeronimo Nte., Santa Fe, Argentina	-31.5527338	-61.077921	1934				1934			FALSE				Las Colonias	Santa Fe	Argentina	Santa Fe	Las Colonias	Bulimulus bonariensis	Bulimulus bonariensis		Mollusca	831286	Bulimulus bonariensis		Eupulmonata	Stylommatophora	Orthalicoidea
197897641	2024-01-10 21:46:23	2024-01-10	2024-01-11 00:46:23 UTC	America/Argentina/Cordoba	6263421	lucas_fornero	Lucas Fornero	2024-01-29 16:07:19 UTC	2024-02-05 17:16:26 UTC	research	CC-BY-NC	https://www.inaturalist.org/observations/197897641	https://inaturalist-open-data.s3.amazonaws.com/photos/348669428/medium.jpeg				1	0	false	2	7GFF+VC, Arroyo Ceibal, Santa Fe, Argentina	-28.7312902165	-59.4525515288	142				142			FALSE	gps	gps		General Obligado	Santa Fe	Argentina	Santa Fe	General Obligado	Bulimulus bonariensis	Bulimulus bonariensis		Mollusca	831286	Bulimulus bonariensis		Eupulmonata	Stylommatophora	Orthalicoidea
197931368	2024-01-24 14:15:05	2024-01-24	2024-01-24 17:15:05 UTC	Buenos Aires	7735698	ignaciostvz	Ignacio Estevez	2024-01-29 23:57:48 UTC	2024-01-30 00:29:23 UTC	research	CC-BY-NC	https://www.inaturalist.org/observations/197931368	https://inaturalist-open-data.s3.amazonaws.com/photos/348738342/medium.jpeg				1	0	false	2	La Lucila, Provincia de Buenos Aires, Argentina	-34.4930586997	-58.4807752997								FALSE	gps	gps		San Isidro	Buenos Aires	Argentina	Buenos Aires	San Isidro	Bulimulus bonariensis	Bulimulus bonariensis		Mollusca	831286	Bulimulus bonariensis		Eupulmonata	Stylommatophora	Orthalicoidea
198182721	2024/01/21 12:05 PM	2024-01-21	2024-01-21 15:05:00 UTC	America/Argentina/Cordoba	144	trekman	Gustavo Fernando Durán	2024-02-02 03:17:43 UTC	2024-02-02 15:47:29 UTC	research	CC-BY-NC-SA	https://www.inaturalist.org/observations/198182721	https://inaturalist-open-data.s3.amazonaws.com/photos/349212907/medium.jpeg				1	0	false		San Jeronimo Nte., Santa Fe, Argentina	-31.5527338	-61.077921	1934				1934			FALSE				Las Colonias	Santa Fe	Argentina	Santa Fe	Las Colonias	Bulimulus bonariensis	Bulimulus bonariensis		Mollusca	831286	Bulimulus bonariensis		Eupulmonata	Stylommatophora	Orthalicoidea
198182825	2024/01/28 7:01 AM	2024-01-28	2024-01-28 10:01:00 UTC	America/Argentina/Cordoba	144	trekman	Gustavo Fernando Durán	2024-02-02 03:18:10 UTC	2024-02-02 15:44:25 UTC	research	CC-BY-NC-SA	https://www.inaturalist.org/observations/198182825	https://inaturalist-open-data.s3.amazonaws.com/photos/349240815/medium.jpeg				1	0	false		San Jeronimo Nte., Santa Fe, Argentina	-31.5501738164	-61.0710545449	1934				1934			FALSE				Las Colonias	Santa Fe	Argentina	Santa Fe	Las Colonias	Bulimulus bonariensis	Bulimulus bonariensis		Mollusca	831286	Bulimulus bonariensis		Eupulmonata	Stylommatophora	Orthalicoidea
198438101	2024/02/04 7:54 PM	2024-02-04	2024-02-04 22:54:00 UTC	Buenos Aires	2713693	bigoti	Juan Diego Döke	2024-02-04 22:56:46 UTC	2024-03-23 20:28:17 UTC	research	CC-BY-NC	https://www.inaturalist.org/observations/198438101	https://inaturalist-open-data.s3.amazonaws.com/photos/349756171/medium.jpg				1	0	false		Dique Luján, Provincia de Buenos Aires, Argentina	-34.3909996783	-58.688849031	1				1			FALSE				Tigre	Buenos Aires	Argentina	Buenos Aires	Tigre	Bulimulus bonariensis	Bulimulus bonariensis		Mollusca	831286	Bulimulus bonariensis		Eupulmonata	Stylommatophora	Orthalicoidea
198536402	2024-02-05 08:39:57	2024-02-05	2024-02-05 11:39:57 UTC	America/Argentina/Cordoba	7184569	heber_aliendro	Heber Aliendro	2024-02-06 02:31:56 UTC	2024-02-06 12:44:36 UTC	research		https://www.inaturalist.org/observations/198536402	https://static.inaturalist.org/photos/349951335/medium.jpeg				1	0	false	2	Córdoba, AR	-31.1455670764	-64.132076604	20				29278	obscured		TRUE	gps	gps		Colón	Córdoba	Argentina	Córdoba	Colón	Bulimulus bonariensis	Bulimulus bonariensis		Mollusca	831286	Bulimulus bonariensis		Eupulmonata	Stylommatophora	Orthalicoidea
198821782	2024-02-08 14:19:22	2024-02-08	2024-02-08 17:19:22 UTC	Buenos Aires	5476983	valeriacotone		2024-02-09 17:44:55 UTC	2024-02-10 14:51:51 UTC	research	CC-BY-NC	https://www.inaturalist.org/observations/198821782	https://inaturalist-open-data.s3.amazonaws.com/photos/350506960/medium.jpeg				1	0	false	2	7400, Olavarría, Provincia de Buenos Aires, Argentina	-36.8936004373	-60.3233501315	20997				20997			FALSE	gps	gps		Olavarría	Buenos Aires	Argentina	Buenos Aires	Olavarría	Bulimulus bonariensis	Bulimulus bonariensis		Mollusca	831286	Bulimulus bonariensis		Eupulmonata	Stylommatophora	Orthalicoidea
198895043	2024-02-10 10:40:35	2024-02-10	2024-02-10 13:40:35 UTC	Buenos Aires	670350	lauravb	Laura Veronica Bianchi	2024-02-10 14:10:42 UTC	2024-02-10 14:52:49 UTC	research	CC-BY-SA	https://www.inaturalist.org/observations/198895043	https://inaturalist-open-data.s3.amazonaws.com/photos/350650355/medium.jpeg				1	0	false	2	Polvaredas, Provincia de Buenos Aires, Argentina	-35.5960529722	-59.5027329722								FALSE	gps	gps		Saladillo	Buenos Aires	Argentina	Buenos Aires	Saladillo	Bulimulus bonariensis	Bulimulus bonariensis		Mollusca	831286	Bulimulus bonariensis		Eupulmonata	Stylommatophora	Orthalicoidea
198988364	2024/02/10 10:34 AM	2024-02-10	2024-02-10 13:34:00 UTC	America/Argentina/Cordoba	5271037	romaju	Martin Juarez	2024-02-11 10:46:11 UTC	2024-02-11 18:47:37 UTC	research	CC-BY-NC	https://www.inaturalist.org/observations/198988364	https://inaturalist-open-data.s3.amazonaws.com/photos/350833760/medium.jpeg				1	0	false		Laguna La Picasa, Gral. López, Santa Fe	-34.3723084162	-62.2876651771	1953				1953			FALSE				General López	Santa Fe	Argentina	Santa Fe	General López	Bulimulus bonariensis	Bulimulus bonariensis		Mollusca	831286	Bulimulus bonariensis		Eupulmonata	Stylommatophora	Orthalicoidea
199002532	2024-02-11 11:07:50	2024-02-11	2024-02-11 14:07:50 UTC	America/Argentina/Salta	2815997	msantillan		2024-02-11 14:30:28 UTC	2024-02-11 19:42:24 UTC	research	CC-BY-NC	https://www.inaturalist.org/observations/199002532	https://inaturalist-open-data.s3.amazonaws.com/photos/350860740/medium.jpeg				1	0	false	2	Toay, La Pampa, Argentina	-36.6782238972	-64.3919919804	13				13			FALSE	gps	gps		Toay	La Pampa	Argentina	La Pampa	Toay	Bulimulus bonariensis	Bulimulus bonariensis		Mollusca	831286	Bulimulus bonariensis		Eupulmonata	Stylommatophora	Orthalicoidea
199096682	2024/02/11 7:51 PM	2024-02-11	2024-02-11 22:51:00 UTC	Buenos Aires	782978	matiascabezas	Matias Cabezas	2024-02-12 12:22:20 UTC	2024-04-04 15:16:22 UTC	research	CC-BY	https://www.inaturalist.org/observations/199096682	https://inaturalist-open-data.s3.amazonaws.com/photos/351046078/medium.jpeg				1	0	false		Berazategui, Provincia de Buenos Aires, Argentina	-34.754840345	-58.124528834	170				170			FALSE				Berazategui	Buenos Aires	Argentina	Buenos Aires	Berazategui	Bulimulus bonariensis	Bulimulus bonariensis		Mollusca	831286	Bulimulus bonariensis		Eupulmonata	Stylommatophora	Orthalicoidea
199107002	2024-02-12 12:08:13	2024-02-12	2024-02-12 15:08:13 UTC	Buenos Aires	6281058	manevillaro	Mane	2024-02-12 15:22:42 UTC	2024-02-12 15:43:41 UTC	research	CC-BY-NC	https://www.inaturalist.org/observations/199107002	https://inaturalist-open-data.s3.amazonaws.com/photos/351068333/medium.jpeg				1	0	false	2	Trenque Lauquen, Provincia de Buenos Aires, Argentina	-36.0093061	-62.7254118								FALSE	gps	gps		Trenque Lauquen	Buenos Aires	Argentina	Buenos Aires	Trenque Lauquen	Bulimulus bonariensis	Bulimulus bonariensis		Mollusca	831286	Bulimulus bonariensis		Eupulmonata	Stylommatophora	Orthalicoidea
199461791	2024-02-14 07:57:14	2024-02-14	2024-02-14 10:57:14 UTC	America/Argentina/Cordoba	1233171	gastma	Gaston Martinez	2024-02-16 14:55:19 UTC	2024-02-17 14:09:03 UTC	research	CC-BY-NC	https://www.inaturalist.org/observations/199461791	https://inaturalist-open-data.s3.amazonaws.com/photos/351760762/medium.jpeg				1	0	false	2	La Capital, Santa Fe, Argentina	-31.4868590392	-60.7544421405	4				4			FALSE	gps	gps		La Capital	Santa Fe	Argentina	Santa Fe	La Capital	Bulimulus bonariensis	Bulimulus bonariensis		Mollusca	831286	Bulimulus bonariensis		Eupulmonata	Stylommatophora	Orthalicoidea
199830167	2024/02/13 6:33 PM	2024-02-13	2024-02-13 21:33:00 UTC	Buenos Aires	4868844	romanlabrousse		2024-02-19 20:46:36 UTC	2024-02-20 10:34:50 UTC	research	CC-BY-NC	https://www.inaturalist.org/observations/199830167	https://inaturalist-open-data.s3.amazonaws.com/photos/352437458/medium.jpeg				2	0	false		Tigre, Provincia de Buenos Aires, Argentina	-34.3686604137	-58.5787424815	168				168			FALSE				Tigre	Buenos Aires	Argentina	Buenos Aires	Tigre	Bulimulus bonariensis	Bulimulus bonariensis		Mollusca	831286	Bulimulus bonariensis		Eupulmonata	Stylommatophora	Orthalicoidea
199859196	2024/02/11 8:33 AM	2024-02-11	2024-02-11 11:33:00 UTC	Buenos Aires	144	trekman	Gustavo Fernando Durán	2024-02-20 02:46:43 UTC	2024-04-06 22:48:59 UTC	research	CC-BY-NC-SA	https://www.inaturalist.org/observations/199859196	https://inaturalist-open-data.s3.amazonaws.com/photos/352506019/medium.jpeg				1	0	false		Puerto Madero, Buenos Aires, Argentina	-34.5974050615	-58.3607979765	186				186			FALSE				Distrito Federal	Ciudad de Buenos Aires	Argentina	Ciudad de Buenos Aires	Distrito Federal	Bulimulus bonariensis	Bulimulus bonariensis		Mollusca	831286	Bulimulus bonariensis		Eupulmonata	Stylommatophora	Orthalicoidea
199921802	2024-01-18 09:51:21	2024-01-18	2024-01-18 12:51:21 UTC	Buenos Aires	3640164	luchila	Lucila Boasso	2024-02-20 19:27:09 UTC	2024-02-21 13:52:43 UTC	research	CC-BY-NC	https://www.inaturalist.org/observations/199921802	https://inaturalist-open-data.s3.amazonaws.com/photos/352629721/medium.jpeg				1	0	false	2	La Costa, Provincia de Buenos Aires, Argentina	-36.5348721216	-56.7322839797	425				425			FALSE	gps	gps		La Costa	Buenos Aires	Argentina	Buenos Aires	La Costa	Bulimulus bonariensis	Bulimulus bonariensis		Mollusca	831286	Bulimulus bonariensis		Eupulmonata	Stylommatophora	Orthalicoidea
200007308	2024-02-21 13:10:30	2024-02-21	2024-02-21 16:10:30 UTC	America/Argentina/Jujuy	7306187	mariselm7	Marisel Morales	2024-02-21 17:02:43 UTC	2024-02-23 02:04:22 UTC	research	CC-BY-NC	https://www.inaturalist.org/observations/200007308	https://inaturalist-open-data.s3.amazonaws.com/photos/352792390/medium.jpeg				1	0	false	2	Libertador Gral San Martín, Jujuy, Argentina	-23.8169591278	-64.7998068194								FALSE	gps	gps		Ledesma	Jujuy	Argentina	Jujuy	Ledesma	Bulimulus bonariensis	Bulimulus bonariensis		Mollusca	831286	Bulimulus bonariensis		Eupulmonata	Stylommatophora	Orthalicoidea
200354675	2024/02/13 1:47 PM	2024-02-13	2024-02-13 16:47:00 UTC	America/Argentina/Tucuman	1384163	pablobaldu	Pablo Balduvino	2024-02-25 03:32:33 UTC	2024-02-25 13:47:53 UTC	research	CC-BY-NC	https://www.inaturalist.org/observations/200354675	https://inaturalist-open-data.s3.amazonaws.com/photos/353472329/medium.jpeg				1	0	false		La Cocha, Tucumán, Argentina	-27.6436344098	-65.7265733472	10752				10752			FALSE				La Cocha	Tucumán	Argentina	Tucumán	La Cocha	Bulimulus bonariensis	Bulimulus bonariensis		Mollusca	831286	Bulimulus bonariensis		Eupulmonata	Stylommatophora	Orthalicoidea
200425937	2024-02-25 15:11:26	2024-02-25	2024-02-25 18:11:26 UTC	America/Argentina/Cordoba	5419216	mariano_aimar	Mariano Aimar	2024-02-25 19:11:09 UTC	2024-02-27 02:32:29 UTC	research	CC-BY-NC	https://www.inaturalist.org/observations/200425937	https://inaturalist-open-data.s3.amazonaws.com/photos/353612696/medium.jpeg				1	0	false	2	S3040, Santa Fe, Argentina	-30.7889172222	-60.5964999273	7				7			FALSE	gps	gps		San Justo	Santa Fe	Argentina	Santa Fe	San Justo	Bulimulus bonariensis	Bulimulus bonariensis		Mollusca	831286	Bulimulus bonariensis		Eupulmonata	Stylommatophora	Orthalicoidea
200459829	2024/02/25 12:59 PM	2024-02-25	2024-02-25 15:59:00 UTC	Buenos Aires	3666067	abrilgn	Abril Gonzalez Navarro	2024-02-26 00:06:42 UTC	2024-03-11 20:00:02 UTC	research	CC-BY-NC	https://www.inaturalist.org/observations/200459829	https://inaturalist-open-data.s3.amazonaws.com/photos/353675422/medium.jpg				1	0	false		Guillermo Enrique Hudson, Provincia de Buenos Aires, Argentina	-34.7601316846	-58.129803125	43				43			FALSE				Berazategui	Buenos Aires	Argentina	Buenos Aires	Berazategui	Bulimulus bonariensis	Bulimulus bonariensis		Mollusca	831286	Bulimulus bonariensis		Eupulmonata	Stylommatophora	Orthalicoidea
200503707	2024/02/25 8:00 AM	2024-02-25	2024-02-25 11:00:00 UTC	America/Argentina/Cordoba	3424269	nmuzzachiodi	Norberto Muzzachiodi	2024-02-26 11:01:55 UTC	2024-03-02 23:37:19 UTC	research	CC-BY-NC	https://www.inaturalist.org/observations/200503707	https://inaturalist-open-data.s3.amazonaws.com/photos/353768523/medium.jpg				2	0	false		Aldea María Luisa, Entre Ríos, Argentina	-31.8833502459	-60.4089284254	4				4			FALSE				Paraná	Entre Ríos	Argentina	Entre Ríos	Paraná	Bulimulus bonariensis	Bulimulus bonariensis		Mollusca	831286	Bulimulus bonariensis		Eupulmonata	Stylommatophora	Orthalicoidea
200503982	2024/02/25 8:04 AM	2024-02-25	2024-02-25 11:04:00 UTC	America/Argentina/Cordoba	3424269	nmuzzachiodi	Norberto Muzzachiodi	2024-02-26 11:06:33 UTC	2024-02-28 14:51:06 UTC	research	CC-BY-NC	https://www.inaturalist.org/observations/200503982	https://inaturalist-open-data.s3.amazonaws.com/photos/353768721/medium.jpg			trapando parde vivienda en día de lluvia copiosa	1	0	false		Aldea María Luisa, Entre Ríos, Argentina	-31.8825251163	-60.4089919243	2				2			FALSE				Paraná	Entre Ríos	Argentina	Entre Ríos	Paraná	Bulimulus bonariensis	Bulimulus bonariensis		Mollusca	831286	Bulimulus bonariensis		Eupulmonata	Stylommatophora	Orthalicoidea
200574270	2024/02/13 9:59 AM	2024-02-13	2024-02-13 12:59:00 UTC	America/Argentina/Cordoba	144	trekman	Gustavo Fernando Durán	2024-02-27 01:29:51 UTC	2024-02-27 18:23:03 UTC	research	CC-BY-NC-SA	https://www.inaturalist.org/observations/200574270	https://inaturalist-open-data.s3.amazonaws.com/photos/353853231/medium.jpeg				1	0	false		San Jeronimo Nte., Santa Fe, Argentina	-31.5509418188	-61.0677500634	1934				1934			FALSE				Las Colonias	Santa Fe	Argentina	Santa Fe	Las Colonias	Bulimulus bonariensis	Bulimulus bonariensis		Mollusca	831286	Bulimulus bonariensis		Eupulmonata	Stylommatophora	Orthalicoidea
200659877	2024/01/13 7:39 AM	2024-01-13	2024-01-13 10:39:00 UTC	America/Argentina/Cordoba	1383117	rguller	Roberto Guller	2024-02-27 21:56:52 UTC	2024-02-28 23:59:55 UTC	research	CC-BY-NC	https://www.inaturalist.org/observations/200659877	https://inaturalist-open-data.s3.amazonaws.com/photos/354066807/medium.jpg				1	0	false		Islas del Ibicuy, Entre Ríos, Argentina	-33.4981462194	-58.7598701702	8				8			FALSE				Islas del Ibicuy	Entre Ríos	Argentina	Entre Ríos	Islas del Ibicuy	Bulimulus bonariensis	Bulimulus bonariensis		Mollusca	831286	Bulimulus bonariensis		Eupulmonata	Stylommatophora	Orthalicoidea
200772190	2024-02-28 21:22:17	2024-02-28	2024-02-29 00:22:17 UTC	America/Argentina/Cordoba	3886057	tresg		2024-02-29 00:27:15 UTC	2024-03-01 02:34:40 UTC	research	CC-BY-NC	https://www.inaturalist.org/observations/200772190	https://inaturalist-open-data.s3.amazonaws.com/photos/354285613/medium.jpeg				1	0	false	2	Vera, Santa Fe, Argentina	-29.4611419008	-60.2146338299	15017				15017			FALSE	gps	gps		Vera	Santa Fe	Argentina	Santa Fe	Vera	Bulimulus bonariensis	Bulimulus bonariensis		Mollusca	831286	Bulimulus bonariensis		Eupulmonata	Stylommatophora	Orthalicoidea
200821722	2024/02/27 9:59 AM	2024-02-27	2024-02-27 12:59:00 UTC	America/Argentina/Cordoba	1445301	andrespautasso	Andrés Pautasso	2024-02-29 15:43:09 UTC	2024-03-02 20:20:50 UTC	research	CC-BY-NC	https://www.inaturalist.org/observations/200821722	https://inaturalist-open-data.s3.amazonaws.com/photos/354380875/medium.jpeg				1	0	false		San Jerónimo, Santa Fe, Argentina	-32.2943425895	-60.7312553971	61				61			FALSE				San Jerónimo	Santa Fe	Argentina	Santa Fe	San Jerónimo	Bulimulus bonariensis	Bulimulus bonariensis		Mollusca	831286	Bulimulus bonariensis		Eupulmonata	Stylommatophora	Orthalicoidea
201128307	2024-03-02 17:05:50	2024-03-02	2024-03-02 20:05:50 UTC	Buenos Aires	1660164	el_druida	Iván Eroles	2024-03-03 14:48:36 UTC	2024-03-04 13:41:08 UTC	research	CC-BY-NC	https://www.inaturalist.org/observations/201128307	https://inaturalist-open-data.s3.amazonaws.com/photos/354986388/medium.jpeg				1	0	false	2	Colectora Norte Acceso Oeste, El Palomar, Provincia de Buenos Aires, Argentina	-34.6268583001	-58.6116716266	275				275			FALSE	gps	gps		Morón	Buenos Aires	Argentina	Buenos Aires	Morón	Bulimulus bonariensis	Bulimulus bonariensis		Mollusca	831286	Bulimulus bonariensis		Eupulmonata	Stylommatophora	Orthalicoidea
201188580	2024-03-03 11:22:15	2024-03-03	2024-03-03 14:22:15 UTC	Buenos Aires	2741741	astridnautas		2024-03-03 22:45:24 UTC	2024-03-04 13:41:16 UTC	research	CC-BY-NC	https://www.inaturalist.org/observations/201188580	https://inaturalist-open-data.s3.amazonaws.com/photos/355102009/medium.jpeg				1	0	false	2	Presidente Derqui 2505-2593, El Palomar, Provincia de Buenos Aires, Argentina	-34.6263539722	-58.6082079722								FALSE	gps	gps		Morón	Buenos Aires	Argentina	Buenos Aires	Morón	Ghost Bulimulus	Bulimulus bonariensis		Mollusca	831286	Bulimulus bonariensis		Eupulmonata	Stylommatophora	Orthalicoidea
201194930	2024-03-03 11:37:48-03:00	2024-03-03	2024-03-03 14:37:48 UTC	Buenos Aires	1425433	karuquebec		2024-03-03 23:36:06 UTC	2024-05-27 12:05:56 UTC	research	CC0	https://www.inaturalist.org/observations/201194930	https://inaturalist-open-data.s3.amazonaws.com/photos/355114588/medium.jpg				1	0	false	3	Aeropuerto El Palomar, Morón, Province de Buenos Aires, AR	-34.6251366667	-58.6083833333	7				7			FALSE				Morón	Buenos Aires	Argentina	Buenos Aires	Morón	Bulimulus bonariensis	Bulimulus bonariensis		Mollusca	831286	Bulimulus bonariensis		Eupulmonata	Stylommatophora	Orthalicoidea
201264660	2024-03-04 09:55:36	2024-03-04	2024-03-04 12:55:36 UTC	America/Argentina/Cordoba	5567453	gracieladangelo		2024-03-04 15:37:54 UTC	2024-03-06 02:52:24 UTC	research	CC-BY-NC	https://www.inaturalist.org/observations/201264660	https://inaturalist-open-data.s3.amazonaws.com/photos/355255054/medium.jpeg				1	0	false	2	Santo Tomé, Santa Fe, Argentina	-31.6833572222	-60.7823066667								FALSE	gps	gps		La Capital	Santa Fe	Argentina	Santa Fe	La Capital	Bulimulus bonariensis	Bulimulus bonariensis		Mollusca	831286	Bulimulus bonariensis		Eupulmonata	Stylommatophora	Orthalicoidea
201509107	2024-03-06 00:09:10	2024-03-06	2024-03-06 03:09:10 UTC	America/Argentina/Cordoba	3660407	txurruarin	Isaias Maximiliano Churruarin	2024-03-06 20:50:48 UTC	2024-03-07 16:39:30 UTC	research	CC-BY-NC	https://www.inaturalist.org/observations/201509107	https://inaturalist-open-data.s3.amazonaws.com/photos/355725162/medium.jpeg				1	0	false	2	Q63J+38, Tostado, Santa Fe, Argentina	-29.2463563017	-61.7666437849	12				12			FALSE				Nueve de Julio	Santa Fe	Argentina	Santa Fe	Nueve de Julio	Bulimulus bonariensis	Bulimulus bonariensis		Mollusca	831286	Bulimulus bonariensis		Eupulmonata	Stylommatophora	Orthalicoidea
201541420	2024/02/14 3:46 PM	2024-02-14	2024-02-14 18:46:00 UTC	America/Argentina/Cordoba	144	trekman	Gustavo Fernando Durán	2024-03-07 03:22:59 UTC	2024-03-07 13:17:52 UTC	research	CC-BY-NC-SA	https://www.inaturalist.org/observations/201541420	https://inaturalist-open-data.s3.amazonaws.com/photos/355788144/medium.jpeg				2	0	false		Santa Fe de la Vera Cruz, Santa Fe, Argentina	-31.6364454715	-60.6736082589	138				138			FALSE				La Capital	Santa Fe	Argentina	Santa Fe	La Capital	Bulimulus bonariensis	Bulimulus bonariensis		Mollusca	831286	Bulimulus bonariensis		Eupulmonata	Stylommatophora	Orthalicoidea
201674183	2024/03/08 9:17 AM	2024-03-08	2024-03-08 12:17:00 UTC	Buenos Aires	2516993	lucilaneb	Lucila N	2024-03-08 13:31:38 UTC	2024-03-09 15:57:43 UTC	research		https://www.inaturalist.org/observations/201674183	https://static.inaturalist.org/photos/356043271/medium.jpeg				1	0	false		Pinamar, Provincia de Buenos Aires, Argentina	-37.1680222222	-56.8947972222	4				4			FALSE				Pinamar	Buenos Aires	Argentina	Buenos Aires	Pinamar	Bulimulus bonariensis	Bulimulus bonariensis		Mollusca	831286	Bulimulus bonariensis		Eupulmonata	Stylommatophora	Orthalicoidea
201846967	2024/03/06 4:37 PM	2024-03-06	2024-03-06 19:37:00 UTC	America/Argentina/Cordoba	2452293	quentinvdm	Quentin Vandemoortele	2024-03-09 23:00:50 UTC	2024-03-11 13:17:27 UTC	research	CC-BY-NC	https://www.inaturalist.org/observations/201846967	https://inaturalist-open-data.s3.amazonaws.com/photos/356356423/medium.jpg				1	0	false		Río Cuarto, Córdoba, Argentina	-33.237421	-64.6043785								FALSE				Rió Cuarto	Córdoba	Argentina	Córdoba	Rió Cuarto	Bulimulus bonariensis	Bulimulus bonariensis		Mollusca	831286	Bulimulus bonariensis		Eupulmonata	Stylommatophora	Orthalicoidea
202235999	2024/02/18 10:43 AM	2024-02-18	2024-02-18 13:43:00 UTC	America/Argentina/Cordoba	144	trekman	Gustavo Fernando Durán	2024-03-13 02:37:40 UTC	2024-03-13 15:42:40 UTC	research	CC-BY-NC-SA	https://www.inaturalist.org/observations/202235999	https://inaturalist-open-data.s3.amazonaws.com/photos/357131262/medium.jpeg				1	0	false		San Jeronimo Nte., Santa Fe, Argentina	-31.5509783902	-61.0677071481	1934				1934			FALSE				Las Colonias	Santa Fe	Argentina	Santa Fe	Las Colonias	Bulimulus bonariensis	Bulimulus bonariensis		Mollusca	831286	Bulimulus bonariensis		Eupulmonata	Stylommatophora	Orthalicoidea
202267051	2024-03-13 07:49:39	2024-03-13	2024-03-13 10:49:39 UTC	Buenos Aires	3225167	laurabm2020	Lauu	2024-03-13 12:06:21 UTC	2024-03-13 14:59:57 UTC	research	CC-BY	https://www.inaturalist.org/observations/202267051	https://inaturalist-open-data.s3.amazonaws.com/photos/357201359/medium.jpeg				2	0	false	2	Casbas, Provincia de Buenos Aires, Argentina	-36.751541	-62.501727								FALSE	gps	gps		Guaminí	Buenos Aires	Argentina	Buenos Aires	Guaminí	Bulimulus bonariensis	Bulimulus bonariensis		Mollusca	831286	Bulimulus bonariensis		Eupulmonata	Stylommatophora	Orthalicoidea
203225118	2024/03/14 12:07 PM	2024-03-14	2024-03-14 15:07:00 UTC	Buenos Aires	2523944	juanmanuelatencio	Geografiaargentina	2024-03-20 13:19:40 UTC	2024-03-20 22:16:40 UTC	research	CC-BY	https://www.inaturalist.org/observations/203225118	https://inaturalist-open-data.s3.amazonaws.com/photos/359028286/medium.jpg			Encontrado en un camino de tierra, durante un día de lluvia.																											Mollusca	831286	Bulimulus bonariensis		Eupulmonata	Stylommatophora	Orthalicoidea
204017652	2024-03-20 16:08:00	2024-03-20	2024-03-20 19:08:00 UTC	Buenos Aires	3483102	analiabelaus	Analía Belaus	2024-03-26 14:09:26 UTC	2024-03-27 23:09:39 UTC	research	CC-BY-NC	https://www.inaturalist.org/observations/204017652	https://inaturalist-open-data.s3.amazonaws.com/photos/360548614/medium.jpeg			Foto de Alicia Fandiño	1	0	false	2	Tres Arroyos, Provincia de Buenos Aires, Argentina	-38.8385457577	-60.0641437992	75				75			FALSE	gps	gps		Tres Arroyos	Buenos Aires	Argentina	Buenos Aires	Tres Arroyos	Bulimulus bonariensis	Bulimulus bonariensis		Mollusca	831286	Bulimulus bonariensis		Eupulmonata	Stylommatophora	Orthalicoidea
204285686	2024-03-28 14:14:27	2024-03-28	2024-03-28 17:14:27 UTC	America/Argentina/Salta	2815997	msantillan		2024-03-28 17:20:17 UTC	2024-03-29 03:01:16 UTC	research	CC-BY-NC	https://www.inaturalist.org/observations/204285686	https://inaturalist-open-data.s3.amazonaws.com/photos/361065108/medium.jpeg				1	0	false	2	Toay, La Pampa, Argentina	-36.6782163682	-64.391968511	7				7			FALSE	gps	gps		Toay	La Pampa	Argentina	La Pampa	Toay	Bulimulus bonariensis	Bulimulus bonariensis		Mollusca	831286	Bulimulus bonariensis		Eupulmonata	Stylommatophora	Orthalicoidea
204341442	2024/03/10 7:36 AM	2024-03-10	2024-03-10 10:36:00 UTC	America/Argentina/Cordoba	144	trekman	Gustavo Fernando Durán	2024-03-29 01:42:37 UTC	2024-03-29 12:23:34 UTC	research	CC-BY-NC-SA	https://www.inaturalist.org/observations/204341442	https://inaturalist-open-data.s3.amazonaws.com/photos/361161101/medium.jpeg				1	0	false		San Jeronimo Nte., Santa Fe, Argentina	-31.5527338	-61.077921	1934				1934			FALSE				Las Colonias	Santa Fe	Argentina	Santa Fe	Las Colonias	Bulimulus bonariensis	Bulimulus bonariensis		Mollusca	831286	Bulimulus bonariensis		Eupulmonata	Stylommatophora	Orthalicoidea
204555884	2024-03-29 21:50:48-03:00	2024-03-29	2024-03-30 00:50:48 UTC	America/Argentina/Tucuman	688093	analiab87	Analía Benavidez	2024-03-30 14:43:34 UTC	2024-03-30 17:21:34 UTC	research	CC-BY-NC	https://www.inaturalist.org/observations/204555884	https://inaturalist-open-data.s3.amazonaws.com/photos/361583544/medium.jpg				1	0	false	3	Las Heras, San Pedro de Colalao, Tucumán, AR	-26.2266443758	-65.4871684541	200				200			FALSE				Trancas	Tucumán	Argentina	Tucumán	Trancas	Bulimulus bonariensis	Bulimulus bonariensis		Mollusca	831286	Bulimulus bonariensis		Eupulmonata	Stylommatophora	Orthalicoidea
204985112	2024/04/01 12:06 PM	2024-04-01	2024-04-01 15:06:00 UTC	Buenos Aires	782978	matiascabezas	Matias Cabezas	2024-04-01 20:39:32 UTC	2024-04-04 15:16:15 UTC	research	CC-BY	https://www.inaturalist.org/observations/204985112	https://inaturalist-open-data.s3.amazonaws.com/photos/362377618/medium.jpeg				1	0	false		Berazategui, Provincia de Buenos Aires, Argentina	-34.7586493066	-58.1132672753	586				586			FALSE				Berazategui	Buenos Aires	Argentina	Buenos Aires	Berazategui	Bulimulus bonariensis	Bulimulus bonariensis		Mollusca	831286	Bulimulus bonariensis		Eupulmonata	Stylommatophora	Orthalicoidea
204989491	2024/03/31 10:53 AM	2024-03-31	2024-03-31 13:53:00 UTC	Buenos Aires	2479819	el-naturalista	El Naturalista	2024-04-01 21:08:29 UTC	2024-04-04 15:16:01 UTC	research	CC-BY-NC	https://www.inaturalist.org/observations/204989491	https://inaturalist-open-data.s3.amazonaws.com/photos/362393704/medium.jpg				1	0	false		Trenque Lauquen, Provincia de Buenos Aires, Argentina	-35.9026911997	-62.4835008								FALSE				Trenque Lauquen	Buenos Aires	Argentina	Buenos Aires	Trenque Lauquen	Bulimulus bonariensis	Bulimulus bonariensis		Mollusca	831286	Bulimulus bonariensis		Eupulmonata	Stylommatophora	Orthalicoidea
205428472	2024/04/04 10:15 AM	2024-04-04	2024-04-04 13:15:00 UTC	Buenos Aires	2538072	eduardo_haene		2024-04-04 21:08:30 UTC	2024-04-06 22:48:44 UTC	research	CC-BY-NC	https://www.inaturalist.org/observations/205428472	https://inaturalist-open-data.s3.amazonaws.com/photos/363232817/medium.jpeg				1	0	false		Colegiales, Cdad. Autónoma de Buenos Aires, Argentina	-34.5703686476	-58.4535052413	1345				1345			FALSE				Distrito Federal	Ciudad de Buenos Aires	Argentina	Ciudad de Buenos Aires	Distrito Federal	Bulimulus bonariensis	Bulimulus bonariensis		Mollusca	831286	Bulimulus bonariensis		Eupulmonata	Stylommatophora	Orthalicoidea
206187386	2024/03/24 11:47 AM	2024-03-24	2024-03-24 14:47:00 UTC	America/Argentina/Cordoba	144	trekman	Gustavo Fernando Durán	2024-04-09 02:44:59 UTC	2024-04-11 15:28:34 UTC	research	CC-BY-NC-SA	https://www.inaturalist.org/observations/206187386	https://inaturalist-open-data.s3.amazonaws.com/photos/364652877/medium.jpeg				1	0	false		San Jeronimo Nte., Santa Fe, Argentina	-31.5527338	-61.077921	1934				1934			FALSE				Las Colonias	Santa Fe	Argentina	Santa Fe	Las Colonias	Bulimulus bonariensis	Bulimulus bonariensis		Mollusca	831286	Bulimulus bonariensis		Eupulmonata	Stylommatophora	Orthalicoidea
206346069	2024-04-07 16:50:40	2024-04-07	2024-04-07 19:50:40 UTC	Buenos Aires	7846600	milycarcacha	Milagros María Luján Carcacha	2024-04-10 01:12:14 UTC	2024-04-10 12:57:24 UTC	research	CC-BY-NC	https://www.inaturalist.org/observations/206346069	https://inaturalist-open-data.s3.amazonaws.com/photos/364955074/medium.jpeg				2	0	false	2	Bella Vista, Provincia de Buenos Aires, Argentina	-34.5724815959	-58.6696063355	452				452			FALSE	gps	gps		General Sarmiento	Buenos Aires	Argentina	Buenos Aires	General Sarmiento	Bulimulus bonariensis	Bulimulus bonariensis		Mollusca	831286	Bulimulus bonariensis		Eupulmonata	Stylommatophora	Orthalicoidea
209486757	2019/10/24 12:09 PM	2019-10-24	2019-10-24 15:09:00 UTC	America/Argentina/Cordoba	2823932	rebecaquetglas	Rebeca Quetglas	2024-04-26 10:46:01 UTC	2024-04-26 10:46:38 UTC	research	CC0	https://www.inaturalist.org/observations/209486757	https://inaturalist-open-data.s3.amazonaws.com/photos/370705654/medium.jpg				1	0	false		Bell Ville, Córdoba, Argentina	-32.6256173533	-62.6988342399	31				31			FALSE				Unión	Córdoba	Argentina	Córdoba	Unión	Bulimulus bonariensis	Bulimulus bonariensis		Mollusca	831286	Bulimulus bonariensis		Eupulmonata	Stylommatophora	Orthalicoidea
210162050	2024/03/29 10:02 AM	2024-03-29	2024-03-29 13:02:00 UTC	Buenos Aires	893121	martin_arregui	Martin Arregui	2024-04-27 14:16:33 UTC	2024-04-27 16:23:57 UTC	research	CC-BY-NC	https://www.inaturalist.org/observations/210162050	https://inaturalist-open-data.s3.amazonaws.com/photos/371752377/medium.jpeg				1	0	false		Berisso, Provincia de Buenos Aires, Argentina	-34.8668082604	-57.8677509824	61				61			FALSE				Berisso	Buenos Aires	Argentina	Buenos Aires	Berisso	Bulimulus bonariensis	Bulimulus bonariensis		Mollusca	831286	Bulimulus bonariensis		Eupulmonata	Stylommatophora	Orthalicoidea
210515362	2024-04-27 17:15:18	2024-04-27	2024-04-27 20:15:18 UTC	Buenos Aires	7806726	ivanain	ivana naivirt	2024-04-28 00:12:52 UTC	2024-04-30 15:18:12 UTC	research	CC-BY	https://www.inaturalist.org/observations/210515362	https://static.inaturalist.org/photos/372339575/medium.jpeg				1	0	false	2	Bella Vista, Provincia de Buenos Aires, Argentina	-34.5721216007	-58.6694397032	198				198			FALSE				General Sarmiento	Buenos Aires	Argentina	Buenos Aires	General Sarmiento	Bulimulus bonariensis	Bulimulus bonariensis		Mollusca	831286	Bulimulus bonariensis		Eupulmonata	Stylommatophora	Orthalicoidea
211226071	2024-04-28 13:20:16	2024-04-28	2024-04-28 16:20:16 UTC	Buenos Aires	5597875	cin-nature	Cinthia	2024-04-29 00:17:02 UTC	2024-04-29 01:37:10 UTC	research	CC-BY-NC	https://www.inaturalist.org/observations/211226071	https://inaturalist-open-data.s3.amazonaws.com/photos/373478500/medium.jpeg				1	0	false	2	Bella Vista, Provincia de Buenos Aires, Argentina	-34.5728912222	-58.6696471944								FALSE	gps	gps		General Sarmiento	Buenos Aires	Argentina	Buenos Aires	General Sarmiento	Bulimulus bonariensis	Bulimulus bonariensis		Mollusca	831286	Bulimulus bonariensis		Eupulmonata	Stylommatophora	Orthalicoidea
213284699	2024-05-02 12:00:09	2024-05-02	2024-05-02 15:00:09 UTC	America/Argentina/Cordoba	733101	pablohcapovilla	Pablo H Capovilla	2024-05-04 00:12:20 UTC	2024-05-07 04:24:35 UTC	research	CC-BY	https://www.inaturalist.org/observations/213284699	https://inaturalist-open-data.s3.amazonaws.com/photos/376925912/medium.jpeg				1	0	false	2	Nueve de Julio, Santa Fe, Argentina	-28.9902307	-61.6156397								FALSE	gps	gps		Nueve de Julio	Santa Fe	Argentina	Santa Fe	Nueve de Julio	Bulimulus bonariensis	Bulimulus bonariensis		Mollusca	831286	Bulimulus bonariensis		Eupulmonata	Stylommatophora	Orthalicoidea
213526254	2024-05-04 12:12:40	2024-05-04	2024-05-04 15:12:40 UTC	Buenos Aires	7194724	zorflor	Flor Zorzoli	2024-05-04 21:35:23 UTC	2024-05-04 21:51:06 UTC	research	CC-BY-NC	https://www.inaturalist.org/observations/213526254	https://inaturalist-open-data.s3.amazonaws.com/photos/377363045/medium.jpeg				1	0	false	2	Bella Vista, Provincia de Buenos Aires, Argentina	-34.5721216007	-58.6694397032	198				198			FALSE	gps	gps		General Sarmiento	Buenos Aires	Argentina	Buenos Aires	General Sarmiento	Bulimulus bonariensis	Bulimulus bonariensis		Mollusca	831286	Bulimulus bonariensis		Eupulmonata	Stylommatophora	Orthalicoidea
213584343	2024-05-04 15:49:16	2024-05-04	2024-05-04 18:49:16 UTC	America/Argentina/Cordoba	3640164	luchila	Lucila Boasso	2024-05-05 02:12:24 UTC	2024-05-07 03:11:29 UTC	research	CC-BY-NC	https://www.inaturalist.org/observations/213584343	https://inaturalist-open-data.s3.amazonaws.com/photos/377472254/medium.jpeg				1	0	false	2	16711, Santo Tomé, Santa Fe, Argentina	-31.6651008932	-60.7678977773	18				18			FALSE	gps	gps		La Capital	Santa Fe	Argentina	Santa Fe	La Capital	Bulimulus bonariensis	Bulimulus bonariensis		Mollusca	831286	Bulimulus bonariensis		Eupulmonata	Stylommatophora	Orthalicoidea
215566343	2024/05/12 11:03 AM	2024-05-12	2024-05-12 14:03:00 UTC	Buenos Aires	1454648	r-a-p	RAP	2024-05-13 20:04:10 UTC	2024-05-13 20:53:18 UTC	research	CC-BY-NC	https://www.inaturalist.org/observations/215566343	https://static.inaturalist.org/photos/381133978/medium.jpg				1	0	false		Buenos Aires, CABA, Argentina	-34.601423658	-58.4433571957	8440				8440			FALSE				Distrito Federal	Ciudad de Buenos Aires	Argentina	Ciudad de Buenos Aires	Distrito Federal	Bulimulus bonariensis	Bulimulus bonariensis		Mollusca	831286	Bulimulus bonariensis		Eupulmonata	Stylommatophora	Orthalicoidea
217208825	2024/05/19 5:02 PM	2024-05-19	2024-05-19 20:02:00 UTC	America/Argentina/Cordoba	144	trekman	Gustavo Fernando Durán	2024-05-21 02:30:17 UTC	2024-05-21 20:25:07 UTC	research	CC-BY-NC-SA	https://www.inaturalist.org/observations/217208825	https://inaturalist-open-data.s3.amazonaws.com/photos/384039166/medium.jpg				1	0	false		San Jeronimo Nte., Santa Fe, Argentina	-31.5511436656	-61.0867609502	63				63			FALSE				Las Colonias	Santa Fe	Argentina	Santa Fe	Las Colonias	Bulimulus bonariensis	Bulimulus bonariensis		Mollusca	831286	Bulimulus bonariensis		Eupulmonata	Stylommatophora	Orthalicoidea
217737415	2023/12/25 10:21 AM	2023-12-25	2023-12-25 13:21:00 UTC	America/Argentina/Cordoba	144	trekman	Gustavo Fernando Durán	2024-05-23 18:03:42 UTC	2024-05-23 19:53:22 UTC	research	CC-BY-NC-SA	https://www.inaturalist.org/observations/217737415	https://inaturalist-open-data.s3.amazonaws.com/photos/385212476/medium.jpeg				1	0	false		San Jeronimo Nte., Santa Fe, Argentina	-31.5527338	-61.077921	1934				1934			FALSE				Las Colonias	Santa Fe	Argentina	Santa Fe	Las Colonias	Bulimulus bonariensis	Bulimulus bonariensis		Mollusca	831286	Bulimulus bonariensis		Eupulmonata	Stylommatophora	Orthalicoidea
156062693	2023-04-22 11:49:10	2023-04-22	2023-04-22 14:49:10 UTC	America/Argentina/Cordoba	5464947	delfinae_	Delfina Espeche Saban	2023-04-22 15:40:32 UTC	2023-04-22 15:40:40 UTC	needs_id		https://www.inaturalist.org/observations/156062693	https://static.inaturalist.org/photos/269822533/medium.jpeg				0	0	false	2	Reserva Natural Urbana General San MartÃ­n	-313652732677	-642623812705	197				197			false	gps	gps		Capital	CÃ³rdoba	Argentina	CÃ³rdoba	Capital	Door snails	Clausiliidae		Mollusca	84784		Heterobranchia	Eupulmonata	Stylommatophora	Clausilioidea
195786275	2024-01-04 10:39:40	2024-01-04	2024-01-04 13:39:40 UTC	America/Argentina/Cordoba	3388807	lucascarbone	Lucas Carbone	2024-01-04 22:09:29 UTC	2024-01-04 22:09:35 UTC	needs_id	CC-BY-NC	https://www.inaturalist.org/observations/195786275	https://inaturalist-open-data.s3.amazonaws.com/photos/344527445/medium.jpeg				0	0	false	2	Punilla, CÃ³rdoba, Argentina	-314554539722	-64543249								false	gps	gps		Punilla	CÃ³rdoba	Argentina	CÃ³rdoba	Punilla	Door snails	Clausiliidae		Mollusca	84784		Heterobranchia	Eupulmonata	Stylommatophora	Clausilioidea
21101422	2007-03-25 5:01:21 a. m. GMT-03:00	2007-03-25	2007-03-25 20:01:21 UTC	Buenos Aires	7732	npelegrin	NicolÃ¡s Pelegrin	2019-03-10 03:16:44 UTC	2023-08-20 00:10:00 UTC	needs_id	CC-BY	https://www.inaturalist.org/observations/21101422	https://static.inaturalist.org/photos/32611301/medium.jpeg				1	0	false	2	Pocho, CÃ³rdoba, Argentina	-313681689557	-654574458674	8415				8415			false	gps	gps		Pocho	CÃ³rdoba	Argentina	CÃ³rdoba	Pocho	Clessinia chancanina	Clessinia chancanina		Mollusca	872418	Clessinia chancanina	Heterobranchia	Eupulmonata	Stylommatophora	Orthalicoidea
37763198	2019-12-28 19:52:00	2019-12-28	2019-12-28 22:52:00 UTC	Buenos Aires	50445	nicoolejnik	Nicolas Olejnik	2020-01-20 00:31:37 UTC	2022-08-05 11:41:34 UTC	needs_id	CC-BY-NC	https://www.inaturalist.org/observations/37763198	https://inaturalist-open-data.s3.amazonaws.com/photos/59930632/medium.jpeg				1	0	false		Punilla, AR-CB, AR	-308704687417	-645457417122	159				159			false				Punilla	CÃ³rdoba	Argentina	CÃ³rdoba	Punilla	Clessinia chancanina	Clessinia chancanina		Mollusca	872418	Clessinia chancanina	Heterobranchia	Eupulmonata	Stylommatophora	Orthalicoidea
73470537	2021-03-01 08:47:00	2021-03-01	2021-03-01 11:47:00 UTC	Buenos Aires	1383117	rguller	Roberto Guller	2021-04-10 08:16:04 UTC	2022-08-05 11:41:33 UTC	needs_id	CC-BY-NC	https://www.inaturalist.org/observations/73470537	https://inaturalist-open-data.s3.amazonaws.com/photos/119953075/medium.jpg				1	0	false		Capilla del Monte, CÃ³rdoba, Argentina	-308742970583	-64519794984	2				2			false				Punilla	CÃ³rdoba	Argentina	CÃ³rdoba	Punilla	Clessinia chancanina	Clessinia chancanina		Mollusca	872418	Clessinia chancanina	Heterobranchia	Eupulmonata	Stylommatophora	Orthalicoidea
128292490	2017-01-20 10:33:00	2017-01-20	2017-01-20 13:33:00 UTC	America/Argentina/Cordoba	382941	lrubio7	Lucas Rubio	2022-07-28 13:39:57 UTC	2023-08-20 00:10:00 UTC	needs_id	CC-BY	https://www.inaturalist.org/observations/128292490	https://inaturalist-open-data.s3.amazonaws.com/photos/217902294/medium.jpg				1	0	false		Los Paredones, CÃ³rdoba, Argentina	-308029008	-645412586	197				197			false				Punilla	CÃ³rdoba	Argentina	CÃ³rdoba	Punilla	Orthalicoidea	Clessinia chancanina		Mollusca	872418	Clessinia chancanina	Heterobranchia	Eupulmonata	Stylommatophora	Orthalicoidea
168541313	2023-04-22 11:00:00	2023-04-22	2023-04-22 14:00:00 UTC	America/Argentina/Cordoba	6618887	frandelver		2023-06-20 19:56:06 UTC	2023-06-21 22:45:19 UTC	research	CC-BY-NC	https://www.inaturalist.org/observations/168541313	https://inaturalist-open-data.s3.amazonaws.com/photos/292101715/medium.jpg				1	0	false		Parque Chateau Carreras, CÃ³rdoba, Argentina	-313625209313	-642621828129	134				134			false				Capital	CÃ³rdoba	Argentina	CÃ³rdoba	Capital	Clessinia cordovana	Clessinia cordovana		Mollusca	872411	Clessinia cordovana	Heterobranchia	Eupulmonata	Stylommatophora	Orthalicoidea
140362256	2022-10-28 15:56:54	2022-10-28	2022-10-28 18:56:54 UTC	America/Argentina/Cordoba	1887221	sebastianlescano	Sebastián Lescano	2022-10-29 11:21:31 UTC	2022-10-29 11:21:43 UTC	needs_id	CC-BY	https://www.inaturalist.org/observations/140362256	https://inaturalist-open-data.s3.amazonaws.com/photos/240257551/medium.jpg				0	0	FALSE	3	Cataratas del Iguazú, Iguazú, Misiones, AR	-256885491801	-544460259132	39				39			FALSE				Iguazú	Misiones	Argentina	Misiones	Iguazú		Cochlicella		Mollusca	172086		Heterobranchia	Eupulmonata	Stylommatophora	Helicoidea
1023217	2014-10-16	2014-10-16		Buenos Aires	50445	nicoolejnik	Nicolas Olejnik	2014-10-17 19:57:54 UTC	2019-06-25 20:59:49 UTC	research	CC-BY-NC	http://www.inaturalist.org/observations/1023217	https://inaturalist-open-data.s3.amazonaws.com/photos/1282624/medium.jpg				3	0	false		Lobos, Buenos Aires	-3517037	-59089022	1293				1293			false				Lobos	Buenos Aires	Argentina	Buenos Aires	Lobos	Garden Snail	Cornu aspersum	caracol de jardÃ­n	Mollusca	480298	Cornu aspersum	Heterobranchia	Eupulmonata	Stylommatophora	Helicoidea
1106009	2010-08-28	2010-08-28		Buenos Aires	50445	nicoolejnik	Nicolas Olejnik	2014-12-01 17:55:58 UTC	2019-09-10 17:30:48 UTC	research	CC-BY-NC	http://www.inaturalist.org/observations/1106009	https://inaturalist-open-data.s3.amazonaws.com/photos/1390363/medium.JPG				3	0	false		Chascomus	-35579179	-58013687	1302				1302			false				ChascomÃºs	Buenos Aires	Argentina	Buenos Aires	ChascomÃºs	Garden Snail	Cornu aspersum	caracol de jardÃ­n	Mollusca	480298	Cornu aspersum	Heterobranchia	Eupulmonata	Stylommatophora	Helicoidea
1135600	2014-12-11	2014-12-11		Buenos Aires	50445	nicoolejnik	Nicolas Olejnik	2014-12-17 14:28:42 UTC	2019-08-09 17:16:14 UTC	research	CC-BY-NC	http://www.inaturalist.org/observations/1135600	https://inaturalist-open-data.s3.amazonaws.com/photos/1428207/medium.JPG				3	0	false		Mar del Plata	-37986295	-57543694	99				99			false				General PueyrredÃ³n	Buenos Aires	Argentina	Buenos Aires	General PueyrredÃ³n	Garden Snail	Cornu aspersum	caracol de jardÃ­n	Mollusca	480298	Cornu aspersum	Heterobranchia	Eupulmonata	Stylommatophora	Helicoidea
1391717	2015-04-13	2015-04-13		Buenos Aires	50445	nicoolejnik	Nicolas Olejnik	2015-04-13 21:23:18 UTC	2019-06-25 21:00:14 UTC	research	CC-BY-NC	http://www.inaturalist.org/observations/1391717	https://inaturalist-open-data.s3.amazonaws.com/photos/1720596/medium.JPG				3	0	false		Ramos Mejia, Buenos Aires	-34654907	-58553635	304				304			false				La Matanza	Buenos Aires	Argentina	Buenos Aires	La Matanza	Garden Snail	Cornu aspersum	caracol de jardÃ­n	Mollusca	480298	Cornu aspersum	Heterobranchia	Eupulmonata	Stylommatophora	Helicoidea
1799191	2011-10-11	2011-10-11		Buenos Aires	50445	nicoolejnik	Nicolas Olejnik	2015-07-25 15:05:04 UTC	2019-08-09 17:00:35 UTC	research	CC-BY-NC	http://www.inaturalist.org/observations/1799191	https://inaturalist-open-data.s3.amazonaws.com/photos/2179831/medium.JPG				2	0	false		Puerto Madryn, Chubut	-42769448	-65031718	1644				1644			false				Biedma	Chubut	Argentina	Chubut	Biedma	Garden Snail	Cornu aspersum	caracol de jardÃ­n	Mollusca	480298	Cornu aspersum	Heterobranchia	Eupulmonata	Stylommatophora	Helicoidea
2103743	2015-10-11	2015-10-11		Buenos Aires	50445	nicoolejnik	Nicolas Olejnik	2015-10-13 11:56:44 UTC	2019-06-25 21:00:35 UTC	research	CC-BY-NC	http://www.inaturalist.org/observations/2103743	https://inaturalist-open-data.s3.amazonaws.com/photos/2519887/medium.jpg				3	0	false		Punta Indio, Buenos Aires	-35258656	-57254047	1735				1735			false				Magdalena	Buenos Aires	Argentina	Buenos Aires	Magdalena	Garden Snail	Cornu aspersum	caracol de jardÃ­n	Mollusca	480298	Cornu aspersum	Heterobranchia	Eupulmonata	Stylommatophora	Helicoidea
9113748	2017-12-09 13:08:00	2017-12-09		Buenos Aires	50445	nicoolejnik	Nicolas Olejnik	2017-12-10 20:02:32 UTC	2019-06-25 20:56:41 UTC	research	CC-BY-NC	https://www.inaturalist.org/observations/9113748	https://inaturalist-open-data.s3.amazonaws.com/photos/12313247/medium.jpeg				2	0	false		Moreno, La Reja, Buenos Aires, Argentina	-346624226587	-588628578186	31				31			false				Moreno	Buenos Aires	Argentina	Buenos Aires	Moreno	Garden Snail	Cornu aspersum	caracol de jardÃ­n	Mollusca	480298	Cornu aspersum	Heterobranchia	Eupulmonata	Stylommatophora	Helicoidea
11268631	2018-04-21 12:22:25 p. m. GMT-03:00	2018-04-21	2018-04-21 09:22:25 UTC	Baghdad	822716	cristinazamorano	Cristina Zamorano	2018-04-21 15:23:49 UTC	2019-06-25 20:52:56 UTC	research		https://www.inaturalist.org/observations/11268631	https://static.inaturalist.org/photos/16017192/medium.jpeg				3	0	false	2	E. FernÃ¡ndez, La Carlota, CÃ³rdoba, Argentina	-334152793884	-632944450378								false	gps	gps		JuÃ¡rez Celman	CÃ³rdoba	Argentina	CÃ³rdoba	JuÃ¡rez Celman	Garden Snail	Cornu aspersum	caracol de jardÃ­n	Mollusca	480298	Cornu aspersum	Heterobranchia	Eupulmonata	Stylommatophora	Helicoidea
11437985	2018-01-22	2018-01-22		UTC	901296	sabrina56	Sabrina Vazquez	2018-04-26 01:17:11 UTC	2018-10-14 16:30:20 UTC	research		https://www.inaturalist.org/observations/11437985	https://static.inaturalist.org/photos/16314872/medium.jpg				2	0	false	2	RN7, CÃ³rdoba, Argentina	-339245535433	-648568697646	11271095				11271095			false	gps	gps		RiÃ³ Cuarto	CÃ³rdoba	Argentina	CÃ³rdoba	RiÃ³ Cuarto	Garden Snail	Cornu aspersum	caracol de jardÃ­n	Mollusca	480298	Cornu aspersum	Heterobranchia	Eupulmonata	Stylommatophora	Helicoidea
11652214	2018-04-28 4:25:04 p.m. ART	2018-04-28	2018-04-28 19:25:04 UTC	Buenos Aires	855878	dieguty	Diego Gutierrez Gregoric	2018-04-28 19:28:29 UTC	2021-04-24 12:59:03 UTC	research	CC-BY-NC	https://www.inaturalist.org/observations/11652214	https://inaturalist-open-data.s3.amazonaws.com/photos/16649066/medium.jpeg				3	0	false	2	Calle 75 1479, B1912CVU Altos de San Lorenzo, Buenos Aires, Argentina	-349497642517	-579431228638								false	gps	gps		La Plata	Buenos Aires	Argentina	Buenos Aires	La Plata	Garden Snail	Cornu aspersum	caracol de jardÃ­n	Mollusca	480298	Cornu aspersum	Heterobranchia	Eupulmonata	Stylommatophora	Helicoidea
11661193	2018-04-28 11:40:54 AM GMT-03:00	2018-04-28	2018-04-28 08:40:54 UTC	Baghdad	844058	adolfochazarreta	Adolfo	2018-04-28 20:30:44 UTC	2019-06-25 20:53:13 UTC	research	CC-BY-NC	https://www.inaturalist.org/observations/11661193	https://inaturalist-open-data.s3.amazonaws.com/photos/16662409/medium.jpeg			Moluscos. Caracol debardin	4	0	false	2	Calle 15 3148, B1897BAV Gonnet, Buenos Aires, Argentina	-348813241523	-58013144061	1376				1376			false	gps	gps		La Plata	Buenos Aires	Argentina	Buenos Aires	La Plata	Garden Snail	Cornu aspersum	caracol de jardÃ­n	Mollusca	480298	Cornu aspersum	Heterobranchia	Eupulmonata	Stylommatophora	Helicoidea
11693301	Fri Apr 27 2018 12:31:28 GMT-0300 (GMT-3)	2018-04-27	2018-04-27 15:31:28 UTC	Brasilia	912205	institutotrasotraso	Instituto Tra.So. Tra.So.	2018-04-29 00:44:42 UTC	2019-06-25 20:53:19 UTC	research		https://www.inaturalist.org/observations/11693301	https://static.inaturalist.org/photos/16713880/medium.jpg			Fotos registradas por alumnos del Instituto Traso. Son alumnos de una escuela de educaciÃ³n especial del barrio de caballito.	3	0	false	3	Calle Paysandu 502â€“600, Buenos Aires, Ciudad AutÃ³noma de Buenos Aires, AR	-346171717029	-584495412429	452				452			false				Distrito Federal	Ciudad de Buenos Aires	Argentina	Ciudad de Buenos Aires	Distrito Federal	Garden Snail	Cornu aspersum	caracol de jardÃ­n	Mollusca	480298	Cornu aspersum	Heterobranchia	Eupulmonata	Stylommatophora	Helicoidea
11912695	2018-04-30 4:58:44 PM GMT-03:00	2018-04-30	2018-04-30 13:58:44 UTC	Baghdad	738478	cdamborenea	Cristina Damborenea	2018-04-30 20:05:02 UTC	2023-09-22 19:51:07 UTC	research	CC-BY-NC	https://www.inaturalist.org/observations/11912695	https://inaturalist-open-data.s3.amazonaws.com/photos/17054891/medium.jpeg			Cornu	5	0	false	2	Calle 417 2652-2700, Villa Elisa, Buenos Aires, Argentina	-348708216667	-5810239	9				9			false				La Plata	Buenos Aires	Argentina	Buenos Aires	La Plata	Garden Snail	Cornu aspersum	caracol de jardÃ­n	Mollusca	480298	Cornu aspersum	Heterobranchia	Eupulmonata	Stylommatophora	Helicoidea
11927770	2018-04-30 11:49:00	2018-04-30		Buenos Aires	922816	susanasalas	Susana Salas	2018-04-30 22:12:40 UTC	2019-06-25 20:51:28 UTC	research	CC-BY-NC	https://www.inaturalist.org/observations/11927770	https://inaturalist-open-data.s3.amazonaws.com/photos/17077164/medium.jpeg				2	0	false		Quilmes, Buenos Aires, Argentina	-347372748094	-582638025284	61				61			false				Quilmes	Buenos Aires	Argentina	Buenos Aires	Quilmes	Garden Snail	Cornu aspersum	caracol de jardÃ­n	Mollusca	480298	Cornu aspersum	Heterobranchia	Eupulmonata	Stylommatophora	Helicoidea
14465219	2018-07-14 14:13:00	2018-07-14		Buenos Aires	50445	nicoolejnik	Nicolas Olejnik	2018-07-18 01:15:51 UTC	2019-08-11 20:39:03 UTC	research	CC-BY-NC	https://www.inaturalist.org/observations/14465219	https://inaturalist-open-data.s3.amazonaws.com/photos/21528708/medium.jpeg				3	0	false		La Reja, Buenos Aires, Argentina	-346623946103	-588622701545	31				31			false				Moreno	Buenos Aires	Argentina	Buenos Aires	Moreno	Garden Snail	Cornu aspersum	caracol de jardÃ­n	Mollusca	480298	Cornu aspersum	Heterobranchia	Eupulmonata	Stylommatophora	Helicoidea
14465240	2018-07-14 13:58:00	2018-07-14		Buenos Aires	50445	nicoolejnik	Nicolas Olejnik	2018-07-18 01:16:00 UTC	2019-08-11 20:38:54 UTC	research	CC-BY-NC	https://www.inaturalist.org/observations/14465240	https://inaturalist-open-data.s3.amazonaws.com/photos/21529106/medium.jpeg				2	0	false		La Reja, Buenos Aires, Argentina	-346617934223	-588617182819	31				31			false				Moreno	Buenos Aires	Argentina	Buenos Aires	Moreno	Garden Snail	Cornu aspersum	caracol de jardÃ­n	Mollusca	480298	Cornu aspersum	Heterobranchia	Eupulmonata	Stylommatophora	Helicoidea
16625791	2018-09-15 20:15:00	2018-09-15		Buenos Aires	78105	gmalonso	GerÃ³nimo MartÃ­n Alonso	2018-09-17 13:44:38 UTC	2019-06-25 20:46:02 UTC	research	CC-BY-NC-ND	https://www.inaturalist.org/observations/16625791	https://inaturalist-open-data.s3.amazonaws.com/photos/25057917/medium.jpg		Bilateria, Eukaryotes, Gastropoda, Mollusca, Moluscos		3	0	false		Pcia de Buenos Aires, Argentina	-351337058	-573863854	193				193			false				Magdalena	Buenos Aires	Argentina	Buenos Aires	Magdalena	Garden Snail	Cornu aspersum	caracol de jardÃ­n	Mollusca	480298	Cornu aspersum	Heterobranchia	Eupulmonata	Stylommatophora	Helicoidea
17294302	2018-10-07 6:18:20 p.m. ART	2018-10-07	2018-10-07 21:18:20 UTC	Buenos Aires	1262494	agostina1	Agostina Boeri	2018-10-07 21:18:57 UTC	2022-02-02 22:07:15 UTC	research		https://www.inaturalist.org/observations/17294302	https://static.inaturalist.org/photos/26243215/medium.jpeg				2	0	false	2	Calle 161 4703, B1861 Platanos, Pcia de Buenos Aires, Argentina	-3478222921	-5816745902	9				9			false				Berazategui	Buenos Aires	Argentina	Buenos Aires	Berazategui	Garden Snail	Cornu aspersum	caracol de jardÃ­n	Mollusca	480298	Cornu aspersum	Heterobranchia	Eupulmonata	Stylommatophora	Helicoidea
17300125	2017/07/29 3:17 PM CDT	2017-07-29	2017-07-29 20:17:00 UTC	Central Time (US & Canada)	1261476	uriman25	Uriel CortÃ©s-JimÃ©nez	2018-10-07 23:53:13 UTC	2019-06-25 20:46:12 UTC	research	CC-BY-NC	https://www.inaturalist.org/observations/17300125	https://inaturalist-open-data.s3.amazonaws.com/photos/26252225/medium.jpg			Caracol comÃºn de jardÃ­n	2	0	false		Costa Azul, Pcia de Buenos Aires, Argentina	-3667544	-5668509								false				La Costa	Buenos Aires	Argentina	Buenos Aires	La Costa	Garden Snail	Cornu aspersum	caracol de jardÃ­n	Mollusca	480298	Cornu aspersum	Heterobranchia	Eupulmonata	Stylommatophora	Helicoidea
17923164	2018-10-27 1:57:37 p. m. ART	2018-10-27	2018-10-27 16:57:37 UTC	Buenos Aires	1255162	romigaleota	Romi Galeota Lencina	2018-10-29 01:50:50 UTC	2021-10-28 15:30:43 UTC	research	CC-BY	https://www.inaturalist.org/observations/17923164	https://inaturalist-open-data.s3.amazonaws.com/photos/27380603/medium.jpeg				3	0	false	2	300-398, B1845APG, Bernardo de Irigoyen, B1845APG JosÃ© Marmol, Pcia de Buenos Aires, Argentina	-347868529	-583792804	20				20			false				Almirante Brown	Buenos Aires	Argentina	Buenos Aires	Almirante Brown	Garden Snail	Cornu aspersum	caracol de jardÃ­n	Mollusca	480298	Cornu aspersum	Heterobranchia	Eupulmonata	Stylommatophora	Helicoidea
17957998	Tue Oct 30 2018 09:16:33 GMT-0300 (GMT-3)	2018-10-30	2018-10-30 12:16:33 UTC	Brasilia	737947	jresasco		2018-10-30 12:24:03 UTC	2019-06-25 20:41:53 UTC	research		https://www.inaturalist.org/observations/17957998	https://static.inaturalist.org/photos/27443470/medium.jpg				2	0	false	3	Calle 9 de Julio 2902â€“3000, General PueyrredÃ³n, Buenos Aires, AR	-37995361835	-57548243096	136				136			false				General PueyrredÃ³n	Buenos Aires	Argentina	Buenos Aires	General PueyrredÃ³n	Garden Snail	Cornu aspersum	caracol de jardÃ­n	Mollusca	480298	Cornu aspersum	Heterobranchia	Eupulmonata	Stylommatophora	Helicoidea
18470021	Sun Nov 18 2018 06:45:25 GMT-0300 (GMT-3)	2018-11-18	2018-11-18 08:45:25 UTC	Brasilia	738863	luisparravicini	Luis Parravicini	2018-11-18 09:46:18 UTC	2019-06-25 20:41:48 UTC	research	CC-BY	https://www.inaturalist.org/observations/18470021	https://inaturalist-open-data.s3.amazonaws.com/photos/28241777/medium.jpg				4	0	false	3	Buenos Aires, AR	-385627439819	-586983906675	5				28240	obscured		true				Necochea	Buenos Aires	Argentina	Buenos Aires	Necochea	Garden Snail	Cornu aspersum	caracol de jardÃ­n	Mollusca	480298	Cornu aspersum	Heterobranchia	Eupulmonata	Stylommatophora	Helicoidea
18713152	2018-11-28 23:06:00	2018-11-28		Buenos Aires	428443	tapi45	HUGO DAVID CAVERZASI	2018-11-29 13:07:18 UTC	2019-06-25 20:42:23 UTC	research	CC-BY-NC	https://www.inaturalist.org/observations/18713152	https://inaturalist-open-data.s3.amazonaws.com/photos/28654010/medium.jpg				4	0	false		Las Varillas, CÃ³rdoba, Argentina	-318722985	-627213671	3677				3677			false				San Justo	CÃ³rdoba	Argentina	CÃ³rdoba	San Justo	Garden Snail	Cornu aspersum	caracol de jardÃ­n	Mollusca	480298	Cornu aspersum	Heterobranchia	Eupulmonata	Stylommatophora	Helicoidea
19034724	2018-12-15 5:35:30 p.m. ART	2018-12-15	2018-12-15 20:35:30 UTC	Buenos Aires	854275	santiagogualchi		2018-12-15 20:52:01 UTC	2019-06-25 20:42:32 UTC	research	CC-BY-NC	https://www.inaturalist.org/observations/19034724	https://inaturalist-open-data.s3.amazonaws.com/photos/29194771/medium.jpeg				2	0	false	2	Las Heras 742, Campana, Buenos Aires, Argentina	-34331438244	-589789579156	5				5			false				ExaltaciÃ³n de la Cruz	Buenos Aires	Argentina	Buenos Aires	ExaltaciÃ³n de la Cruz	Garden Snail	Cornu aspersum	caracol de jardÃ­n	Mollusca	480298	Cornu aspersum	Heterobranchia	Eupulmonata	Stylommatophora	Helicoidea
19087867	Sun Dec 16 2018 18:28:41 GMT-0300 (GMT-3)	2018-12-16	2018-12-16 20:28:41 UTC	Brasilia	1392934	nicolaspetruzzi	Nicolas Petruzzi	2018-12-18 18:36:18 UTC	2023-07-19 14:58:06 UTC	research		https://www.inaturalist.org/observations/19087867	https://static.inaturalist.org/photos/29289902/medium.jpg				2	0	false	3	Calle General Juan Lavalle 702â€“800, Monte Grande, Buenos Aires, AR	-34823815827	-584676524424	67				67			false				Esteban EcheverrÃ­a	Buenos Aires	Argentina	Buenos Aires	Esteban EcheverrÃ­a	Garden Snail	Cornu aspersum	caracol de jardÃ­n	Mollusca	480298	Cornu aspersum	Heterobranchia	Eupulmonata	Stylommatophora	Helicoidea
19258739	2018-12-27 10:59:29 PM GMT-01:00	2018-12-27	2018-12-27 21:59:29 UTC	Amsterdam	772396	raphetnature	Raphael Forns	2018-12-28 00:11:28 UTC	2019-06-25 20:42:39 UTC	research	CC-BY-NC	https://www.inaturalist.org/observations/19258739	https://inaturalist-open-data.s3.amazonaws.com/photos/29593232/medium.jpeg				2	0	false	2	Av. Altair, Mar del Plata, Buenos Aires, Argentine	-380416426955	-575378291309	7				7			false	gps	gps		General PueyrredÃ³n	Buenos Aires	Argentina	Buenos Aires	General PueyrredÃ³n	Garden Snail	Cornu aspersum	caracol de jardÃ­n	Mollusca	480298	Cornu aspersum	Heterobranchia	Eupulmonata	Stylommatophora	Helicoidea
19338745	2018-12-31 5:11:24 p.m. ART	2018-12-31	2018-12-31 20:11:24 UTC	Buenos Aires	854275	santiagogualchi		2018-12-31 20:12:12 UTC	2019-06-25 20:42:57 UTC	research	CC-BY-NC	https://www.inaturalist.org/observations/19338745	https://inaturalist-open-data.s3.amazonaws.com/photos/29737713/medium.jpeg				2	0	false	2	Las Heras 742, Campana, Buenos Aires, Argentina	-343314351	-589789149	82				82			false				ExaltaciÃ³n de la Cruz	Buenos Aires	Argentina	Buenos Aires	ExaltaciÃ³n de la Cruz	Garden Snail	Cornu aspersum	caracol de jardÃ­n	Mollusca	480298	Cornu aspersum	Heterobranchia	Eupulmonata	Stylommatophora	Helicoidea
19427025	2019-01-04 7:46:54 p. m. ART	2019-01-04	2019-01-04 10:46:54 UTC	Buenos Aires	142253	carancho	Leonel Roget	2019-01-04 22:47:40 UTC	2019-06-25 20:43:07 UTC	research	CC-BY	https://www.inaturalist.org/observations/19427025	https://inaturalist-open-data.s3.amazonaws.com/photos/29885153/medium.jpeg				2	0	false	2	Santos Dumont 2724, Buenos Aires, Argentina	-3457622635	-5844134953	4				4			false				Distrito Federal	Ciudad de Buenos Aires	Argentina	Ciudad de Buenos Aires	Distrito Federal	Garden Snail	Cornu aspersum	caracol de jardÃ­n	Mollusca	480298	Cornu aspersum	Heterobranchia	Eupulmonata	Stylommatophora	Helicoidea
19684841	2019-01-16 10:21:08 p. m. ART	2019-01-16	2019-01-16 13:21:08 UTC	Buenos Aires	142253	carancho	Leonel Roget	2019-01-17 01:22:18 UTC	2019-06-25 20:39:45 UTC	research	CC-BY	https://www.inaturalist.org/observations/19684841	https://inaturalist-open-data.s3.amazonaws.com/photos/30320464/medium.jpeg				2	0	false	2	Av. Dorrego 2618, C1425GAQ CABA, Argentina	-3457476524	-5843523408	3				3			false				Distrito Federal	Ciudad de Buenos Aires	Argentina	Ciudad de Buenos Aires	Distrito Federal	Garden Snail	Cornu aspersum	caracol de jardÃ­n	Mollusca	480298	Cornu aspersum	Heterobranchia	Eupulmonata	Stylommatophora	Helicoidea
19903579	Sun Jan 27 2019 09:50:26 GMT-0300 (GMT-3)	2019-01-27	2019-01-27 11:50:26 UTC	Brasilia	886946	ledg		2019-01-27 12:50:34 UTC	2021-09-17 01:05:01 UTC	research		https://www.inaturalist.org/observations/19903579	https://static.inaturalist.org/photos/30697766/medium.jpg				2	0	false	3	Tandil, AR-BA, AR	-373208657652	-591499628965	50				50			false				Tandil	Buenos Aires	Argentina	Buenos Aires	Tandil	Garden Snail	Cornu aspersum	caracol de jardÃ­n	Mollusca	480298	Cornu aspersum	Heterobranchia	Eupulmonata	Stylommatophora	Helicoidea
20262270	2011-10-09 19:05:00	2011-10-09		Buenos Aires	472014	jjbonannod	Juan JosÃ© Bonanno	2019-02-10 21:12:09 UTC	2019-06-25 20:40:04 UTC	research	CC-BY-NC	https://www.inaturalist.org/observations/20262270	https://inaturalist-open-data.s3.amazonaws.com/photos/31275797/medium.jpg				3	0	false		CarilÃ³, Buenos Aires, Argentina	-371615028	-568993073	2099				2099			false				Pinamar	Buenos Aires	Argentina	Buenos Aires	Pinamar	Garden Snail	Cornu aspersum	caracol de jardÃ­n	Mollusca	480298	Cornu aspersum	Heterobranchia	Eupulmonata	Stylommatophora	Helicoidea
20262271	2011-10-09 20:02:00	2011-10-09		Buenos Aires	472014	jjbonannod	Juan JosÃ© Bonanno	2019-02-10 21:12:09 UTC	2019-06-25 20:40:01 UTC	research	CC-BY-NC	https://www.inaturalist.org/observations/20262271	https://inaturalist-open-data.s3.amazonaws.com/photos/31275832/medium.jpg				3	0	false		CarilÃ³, Buenos Aires, Argentina	-371615028	-568993073	2099				2099			false				Pinamar	Buenos Aires	Argentina	Buenos Aires	Pinamar	Garden Snail	Cornu aspersum	caracol de jardÃ­n	Mollusca	480298	Cornu aspersum	Heterobranchia	Eupulmonata	Stylommatophora	Helicoidea
20945909	2019-03-04 13:17:00	2019-03-04		Buenos Aires	1364542	pablof	Pablo Fraire	2019-03-04 16:34:52 UTC	2019-06-25 20:36:11 UTC	research	CC-BY-NC	https://www.inaturalist.org/observations/20945909	https://inaturalist-open-data.s3.amazonaws.com/photos/32334503/medium.jpeg				2	0	false		Florida, Buenos Aires, Argentina	-345202361891	-58487989156	43				43			false				Vicente LÃ³pez	Buenos Aires	Argentina	Buenos Aires	Vicente LÃ³pez	Garden Snail	Cornu aspersum	caracol de jardÃ­n	Mollusca	480298	Cornu aspersum	Heterobranchia	Eupulmonata	Stylommatophora	Helicoidea
21112310	2015-08-30 12:54:00	2015-08-30		Buenos Aires	146947	mbernini	Mauro Bernini	2019-03-10 14:40:02 UTC	2019-03-28 00:16:32 UTC	research	CC-BY-NC-SA	https://www.inaturalist.org/observations/21112310	https://inaturalist-open-data.s3.amazonaws.com/photos/32629622/medium.jpeg				1	0	false		LanÃºs Oeste, Buenos Aires, Argentina	-346865336928	-584323665336	1058				1058			false				LanÃºs	Buenos Aires	Argentina	Buenos Aires	LanÃºs	Garden Snail	Cornu aspersum	caracol de jardÃ­n	Mollusca	480298	Cornu aspersum	Heterobranchia	Eupulmonata	Stylommatophora	Helicoidea
21145511	2019-03-10 14:24:00	2019-03-10		Buenos Aires	50445	nicoolejnik	Nicolas Olejnik	2019-03-11 15:16:41 UTC	2019-08-13 00:52:03 UTC	research	CC-BY-NC	https://www.inaturalist.org/observations/21145511	https://inaturalist-open-data.s3.amazonaws.com/photos/32687355/medium.jpeg				2	0	false		Barrio Norte, CABA, Argentina	-345876308214	-583926521297	8				8			false				Distrito Federal	Ciudad de Buenos Aires	Argentina	Ciudad de Buenos Aires	Distrito Federal	Garden Snail	Cornu aspersum	caracol de jardÃ­n	Mollusca	480298	Cornu aspersum	Heterobranchia	Eupulmonata	Stylommatophora	Helicoidea
21306864	2018-04-06 23:44:00	2018-04-06		Buenos Aires	1205836	elbeltrocco	Eduardo Luis Beltrocco	2019-03-17 02:28:00 UTC	2019-06-25 20:36:54 UTC	research	CC-BY-NC	https://www.inaturalist.org/observations/21306864	https://inaturalist-open-data.s3.amazonaws.com/photos/32948852/medium.jpg				2	0	false		Sarmiento y Centenario, Santo Tome, Santa Fe	-316616575276	-607608092327	18				18			false				La Capital	Santa Fe	Argentina	Santa Fe	La Capital	Garden Snail	Cornu aspersum	caracol de jardÃ­n	Mollusca	480298	Cornu aspersum	Heterobranchia	Eupulmonata	Stylommatophora	Helicoidea
22831377	2009/03/03 11:43 PM UTC	2009-03-03		UTC	1597686	vagabondreports		2019-04-21 18:51:28 UTC	2020-06-26 03:20:29 UTC	research	CC-BY-NC	https://www.inaturalist.org/observations/22831377	https://inaturalist-open-data.s3.amazonaws.com/photos/35385556/medium.jpg				4	0	false		Ushuaia, Tierra del Fuego Province, Argentina	-548019121	-683029511	6410				6410			false				Ushuaia	Tierra del Fuego	Argentina	Tierra del Fuego	Ushuaia	Garden Snail	Cornu aspersum	caracol de jardÃ­n	Mollusca	480298	Cornu aspersum	Heterobranchia	Eupulmonata	Stylommatophora	Helicoidea
23150137	2019-04-26 12:37:43 p. m. GMT-03:00	2019-04-26	2019-04-26 15:37:43 UTC	Brasilia	1672559	santino5	Santino Andreani	2019-04-26 15:38:16 UTC	2020-06-22 16:10:10 UTC	research		https://www.inaturalist.org/observations/23150137	https://static.inaturalist.org/photos/35882215/medium.jpeg				2	0	false	2	Mariano Moreno 846, Gral. Villegas, Buenos Aires, Argentina	-350341237849	-630135806277	7				7			false				General Villegas	Buenos Aires	Argentina	Buenos Aires	General Villegas	Garden Snail	Cornu aspersum	caracol de jardÃ­n	Mollusca	480298	Cornu aspersum	Heterobranchia	Eupulmonata	Stylommatophora	Helicoidea
23150694	2019-04-26 12:39:18 p. m. ART	2019-04-26	2019-04-26 15:39:18 UTC	Buenos Aires	1672602	micucalles	Micu Calles	2019-04-26 15:40:44 UTC	2021-09-17 01:01:26 UTC	research		https://www.inaturalist.org/observations/23150694	https://static.inaturalist.org/photos/35882936/medium.jpeg				2	0	false	2	Mariano Moreno 846, Gral. Villegas, Buenos Aires, Argentina	-350341550494	-630136444978	16				16			false				General Villegas	Buenos Aires	Argentina	Buenos Aires	General Villegas	Garden Snail	Cornu aspersum	caracol de jardÃ­n	Mollusca	480298	Cornu aspersum	Heterobranchia	Eupulmonata	Stylommatophora	Helicoidea
23152548	2019-04-26 12:48:05 p. m. GMT-03:00	2019-04-26	2019-04-26 15:48:05 UTC	Brasilia	1672559	santino5	Santino Andreani	2019-04-26 15:49:39 UTC	2019-08-03 02:08:09 UTC	research		https://www.inaturalist.org/observations/23152548	https://static.inaturalist.org/photos/35885448/medium.jpeg				5	1	false	2	Mariano Moreno 846, Gral. Villegas, Buenos Aires, Argentina	-350340748765	-630135725811	25				25			false				General Villegas	Buenos Aires	Argentina	Buenos Aires	General Villegas	Garden Snail	Cornu aspersum	caracol de jardÃ­n	Mollusca	480298	Cornu aspersum	Heterobranchia	Eupulmonata	Stylommatophora	Helicoidea
23167298	2019-01-27 4:43:05 p. m. GMT-03:00	2019-01-27	2019-01-27 18:43:05 UTC	Brasilia	1674068	santino6	Santino Garetto	2019-04-26 16:53:36 UTC	2019-09-24 20:14:46 UTC	research		https://www.inaturalist.org/observations/23167298	https://static.inaturalist.org/photos/35905636/medium.jpeg				2	0	false	2	RÃ­o Negro, Gral. Villegas, Buenos Aires, Argentina	-350374026177	-629969149735	10				10			false				General Villegas	Buenos Aires	Argentina	Buenos Aires	General Villegas	Garden Snail	Cornu aspersum	caracol de jardÃ­n	Mollusca	480298	Cornu aspersum	Heterobranchia	Eupulmonata	Stylommatophora	Helicoidea
23241620	2019-04-26 7:40:19 PM GMT-03:00	2019-04-26	2019-04-26 22:40:19 UTC	Brasilia	1634400	fernando-i	Fernando Iglesias	2019-04-26 22:42:50 UTC	2019-04-26 23:12:49 UTC	research		https://www.inaturalist.org/observations/23241620	https://static.inaturalist.org/photos/36013429/medium.jpeg				1	0	false	2	Cjal. Larroca 1435, B1619HJS Garin, Buenos Aires, Argentina	-344167091621	-587331553021	8				8			false				Escobar	Buenos Aires	Argentina	Buenos Aires	Escobar	Caracol de jardÃ­n	Cornu aspersum	caracol de jardÃ­n	Mollusca	480298	Cornu aspersum	Heterobranchia	Eupulmonata	Stylommatophora	Helicoidea
23271183	2019-04-26	2019-04-26		Santiago	1653146	gochi		2019-04-27 01:18:06 UTC	2019-06-25 20:33:49 UTC	research	CC-BY-NC	https://www.inaturalist.org/observations/23271183	https://inaturalist-open-data.s3.amazonaws.com/photos/36058506/medium.jpg				2	0	false	2	Gral Villegas, Buenos Aires, Argentina	-349722294844	-62981952019	44615				44615			false	gps	gps		General Villegas	Buenos Aires	Argentina	Buenos Aires	General Villegas	Garden Snail	Cornu aspersum	caracol de jardÃ­n	Mollusca	480298	Cornu aspersum	Heterobranchia	Eupulmonata	Stylommatophora	Helicoidea
23304617	2019-04-27 1:02:43 a. m. ART	2019-04-27	2019-04-27 16:02:43 UTC	Buenos Aires	1669039	mcarolinalago	MarÃ­a Carolina Lago	2019-04-27 04:11:47 UTC	2021-05-26 22:33:44 UTC	research	CC-BY-NC	https://www.inaturalist.org/observations/23304617	https://inaturalist-open-data.s3.amazonaws.com/photos/36108782/medium.jpeg			Infantil. El caparazÃ³n mide 0,5 cm.	1	0	false	2	Av. JosÃ© Manuel Estrada 5645, B7605GAM Mar del Plata, Buenos Aires, Argentina	-379518914636	-57552081719	66				66			false	gps	gps		General PueyrredÃ³n	Buenos Aires	Argentina	Buenos Aires	General PueyrredÃ³n	Garden Snail	Cornu aspersum	caracol de jardÃ­n	Mollusca	480298	Cornu aspersum	Heterobranchia	Eupulmonata	Stylommatophora	Helicoidea
23347798	2019-04-27 09:06:00	2019-04-27		Buenos Aires	1364542	pablof	Pablo Fraire	2019-04-27 12:21:46 UTC	2019-04-28 21:59:14 UTC	research	CC-BY-NC	https://www.inaturalist.org/observations/23347798	https://inaturalist-open-data.s3.amazonaws.com/photos/36169832/medium.jpeg				1	0	false		Florida, Buenos Aires, Argentina	-345202361891	-58487989156	43				43			false				Vicente LÃ³pez	Buenos Aires	Argentina	Buenos Aires	Vicente LÃ³pez	Caracol de jardÃ­n	Cornu aspersum	caracol de jardÃ­n	Mollusca	480298	Cornu aspersum	Heterobranchia	Eupulmonata	Stylommatophora	Helicoidea
23367893	2019-04-27 11:18:21 AM GMT+02:00	2019-04-27	2019-04-27 09:18:21 UTC	Africa/Johannesburg	1667176	lucialuduea	lucia ludueÃ±a	2019-04-27 14:19:41 UTC	2019-06-25 20:34:09 UTC	research		https://www.inaturalist.org/observations/23367893	https://static.inaturalist.org/photos/36197418/medium.jpeg				3	0	false	2	ValentÃ­n GÃ³mez 7310, B1759GAP GonzÃ¡lez CatÃ¡n, Buenos Aires, Argentina	-347753906	-586263756	34				34			false				La Matanza	Buenos Aires	Argentina	Buenos Aires	La Matanza	Garden Snail	Cornu aspersum	caracol de jardÃ­n	Mollusca	480298	Cornu aspersum	Heterobranchia	Eupulmonata	Stylommatophora	Helicoidea
23408934	2019-04-27 2:07:48 PM GMT-03:00	2019-04-27	2019-04-27 17:07:48 UTC	Brasilia	1658739	rominagomez	Romina Gomez	2019-04-27 16:59:51 UTC	2019-08-03 02:07:24 UTC	research		https://www.inaturalist.org/observations/23408934	https://static.inaturalist.org/photos/36253212/medium.jpeg				2	0	false	2	Los Dabove 2184, B1712GWP Castelar, Buenos Aires, Argentina	-346995183333	-586468783333	3				3			false				MorÃ³n	Buenos Aires	Argentina	Buenos Aires	MorÃ³n	Garden Snail	Cornu aspersum	caracol de jardÃ­n	Mollusca	480298	Cornu aspersum	Heterobranchia	Eupulmonata	Stylommatophora	Helicoidea
23421420	2019-04-27 2:48:51 p.m. ART	2019-04-27	2019-04-27 17:48:51 UTC	Buenos Aires	1546853	loly1	Loly Kunakum	2019-04-27 17:50:20 UTC	2019-08-03 02:07:23 UTC	research		https://www.inaturalist.org/observations/23421420	https://static.inaturalist.org/photos/36271825/medium.jpeg			Caracoles	4	0	false	2	Gral. Paz 60, San Antonio de Areco, Buenos Aires, Argentina	-342473016667	-594809666667	4				4			false				San Antonio de Areco	Buenos Aires	Argentina	Buenos Aires	San Antonio de Areco	Garden Snail	Cornu aspersum	caracol de jardÃ­n	Mollusca	480298	Cornu aspersum	Heterobranchia	Eupulmonata	Stylommatophora	Helicoidea
23462788	2019-04-27 4:34:27 p. m. ART	2019-04-27	2019-04-27 19:34:27 UTC	Buenos Aires	301307	ezequielvera	Ezequiel Vera	2019-04-27 20:29:16 UTC	2023-12-19 12:00:42 UTC	research	CC-BY	https://www.inaturalist.org/observations/23462788	https://inaturalist-open-data.s3.amazonaws.com/photos/36333041/medium.jpeg				1	0	false	2	Salcedo 1083, B1875EPU Wilde, Buenos Aires, Argentina	-347155046784	-583267502859	294				294			false	gps	gps		Avellaneda	Buenos Aires	Argentina	Buenos Aires	Avellaneda	Caracol de jardÃ­n	Cornu aspersum	caracol de jardÃ­n	Mollusca	480298	Cornu aspersum	Heterobranchia	Eupulmonata	Stylommatophora	Helicoidea
23631766	2019-04-28 10:52:19 a. m. ART	2019-04-28	2019-04-28 13:52:19 UTC	Buenos Aires	1651643	elianaalvarez	Eliana Alvarez	2019-04-28 14:24:36 UTC	2019-11-12 17:10:22 UTC	research		https://www.inaturalist.org/observations/23631766	https://static.inaturalist.org/photos/36584393/medium.jpeg				2	0	false	2	Rivadavia 1466, Gral. Villegas, Buenos Aires, Argentina	-350338897705	-630024986267								false	gps	gps		General Villegas	Buenos Aires	Argentina	Buenos Aires	General Villegas	Garden Snail	Cornu aspersum	caracol de jardÃ­n	Mollusca	480298	Cornu aspersum	Heterobranchia	Eupulmonata	Stylommatophora	Helicoidea
23722376	2019-04-28 5:08:24 p. m. ART	2019-04-28	2019-04-28 20:08:24 UTC	Buenos Aires	1647523	soledad9	Soledad Tancoff	2019-04-28 20:09:06 UTC	2019-08-03 02:06:41 UTC	research		https://www.inaturalist.org/observations/23722376	https://static.inaturalist.org/photos/36710991/medium.jpeg			Caracol	4	0	false	2	San Isidro, AR-BA, AR	-344698741028	-584967161664	5				5			false				San Isidro	Buenos Aires	Argentina	Buenos Aires	San Isidro	Garden Snail	Cornu aspersum	caracol de jardÃ­n	Mollusca	480298	Cornu aspersum	Heterobranchia	Eupulmonata	Stylommatophora	Helicoidea
23729186	2019-04-28 4:58:55 p.m. ART	2019-04-28	2019-04-28 19:58:55 UTC	Buenos Aires	915765	magcl	Malena Lorente	2019-04-28 20:36:27 UTC	2021-07-26 20:28:45 UTC	research	CC-BY	https://www.inaturalist.org/observations/23729186	https://inaturalist-open-data.s3.amazonaws.com/photos/36720984/medium.jpeg				2	0	false	2	Av. 72 467, B1914 La Plata, Buenos Aires, Argentina	-349286328	-5792550416	9				9			false				La Plata	Buenos Aires	Argentina	Buenos Aires	La Plata	Garden Snail	Cornu aspersum	caracol de jardÃ­n	Mollusca	480298	Cornu aspersum	Heterobranchia	Eupulmonata	Stylommatophora	Helicoidea
23808321	2019-04-27 10:44:00	2019-04-27		Santiago	1694130	gabrielallamosas		2019-04-29 01:34:54 UTC	2020-06-18 22:17:07 UTC	research	CC-BY-NC	https://www.inaturalist.org/observations/23808321	https://inaturalist-open-data.s3.amazonaws.com/photos/36839515/medium.jpg				2	0	false		Tandil, Buenos Aires, Argentina	-373280555556	-591313888889								false				Tandil	Buenos Aires	Argentina	Buenos Aires	Tandil	Garden Snail	Cornu aspersum	caracol de jardÃ­n	Mollusca	480298	Cornu aspersum	Heterobranchia	Eupulmonata	Stylommatophora	Helicoidea
23824176	2019-04-28 6:15:50 PM GMT-03:00	2019-04-28	2019-04-28 21:15:50 UTC	Brasilia	1667146	sebastiantevez	Sebastian Tevez	2019-04-29 02:46:49 UTC	2019-06-25 20:29:38 UTC	research		https://www.inaturalist.org/observations/23824176	https://static.inaturalist.org/photos/36864539/medium.jpeg				2	0	false	2	Cnel. Conde 5685, B1759HHG GonzÃ¡lez CatÃ¡n, Buenos Aires, Argentina	-347767921534	-586296052113	88				88			false	gps	gps		La Matanza	Buenos Aires	Argentina	Buenos Aires	La Matanza	Garden Snail	Cornu aspersum	caracol de jardÃ­n	Mollusca	480298	Cornu aspersum	Heterobranchia	Eupulmonata	Stylommatophora	Helicoidea
23977641	2019-04-29 2:40:43 p. m. GMT-03:00	2019-04-29	2019-04-29 17:40:43 UTC	Brasilia	1653772	jorgepablo	Jorge Pablo Bourdette	2019-04-29 18:00:00 UTC	2019-06-25 20:30:55 UTC	research		https://www.inaturalist.org/observations/23977641	https://static.inaturalist.org/photos/37087447/medium.jpeg				2	0	false	2	Pje. VÃ¡zquez 523, Tandil, Buenos Aires, Argentina	-373400001526	-591294441223								false	gps	gps		Tandil	Buenos Aires	Argentina	Buenos Aires	Tandil	Garden Snail	Cornu aspersum	caracol de jardÃ­n	Mollusca	480298	Cornu aspersum	Heterobranchia	Eupulmonata	Stylommatophora	Helicoidea
24015448	2019-04-29 5:29:40 PM GMT-03:00	2019-04-29	2019-04-29 20:29:40 UTC	Brasilia	1623726	marialaura4	Maria Laura Pedraza	2019-04-29 20:30:10 UTC	2020-01-14 15:43:26 UTC	research		https://www.inaturalist.org/observations/24015448	https://static.inaturalist.org/photos/37144622/medium.jpeg				2	0	false	2	Diagonal 113, Casco Urbano, B1900 La Plata, Buenos Aires, Argentina	-349122233333	-579308183333	4				4			false				La Plata	Buenos Aires	Argentina	Buenos Aires	La Plata	Caracol europeo de jardÃ­n	Cornu aspersum	caracol de jardÃ­n	Mollusca	480298	Cornu aspersum	Heterobranchia	Eupulmonata	Stylommatophora	Helicoidea
24051597	2019/03/19 10:33 AM UTC	2019-03-19		UTC	1700503	gdelosrios		2019-04-29 22:47:21 UTC	2019-06-25 20:31:07 UTC	research	CC-BY-NC	https://www.inaturalist.org/observations/24051597	https://inaturalist-open-data.s3.amazonaws.com/photos/37196789/medium.jpg				2	0	false		Garin, Buenos Aires, Argentina	-344166805556	-587248194444	10				10			false				Tigre	Buenos Aires	Argentina	Buenos Aires	Tigre	Garden Snail	Cornu aspersum	caracol de jardÃ­n	Mollusca	480298	Cornu aspersum	Heterobranchia	Eupulmonata	Stylommatophora	Helicoidea
24051601	2019/03/19 10:49 AM UTC	2019-03-19		UTC	1700503	gdelosrios		2019-04-29 22:47:22 UTC	2019-08-03 02:05:50 UTC	research	CC-BY-NC	https://www.inaturalist.org/observations/24051601	https://inaturalist-open-data.s3.amazonaws.com/photos/37196953/medium.jpg				3	0	false		Garin, Buenos Aires, Argentina	-344166305556	-587249333333	10				10			false				Tigre	Buenos Aires	Argentina	Buenos Aires	Tigre	Garden Snail	Cornu aspersum	caracol de jardÃ­n	Mollusca	480298	Cornu aspersum	Heterobranchia	Eupulmonata	Stylommatophora	Helicoidea
24051603	2019/03/19 10:48 AM UTC	2019-03-19		UTC	1700503	gdelosrios		2019-04-29 22:47:24 UTC	2019-08-03 02:05:45 UTC	research	CC-BY-NC	https://www.inaturalist.org/observations/24051603	https://inaturalist-open-data.s3.amazonaws.com/photos/37197009/medium.jpg				3	0	false		Garin, Buenos Aires, Argentina	-344168888889	-587250555556	204				204			false				Tigre	Buenos Aires	Argentina	Buenos Aires	Tigre	Garden Snail	Cornu aspersum	caracol de jardÃ­n	Mollusca	480298	Cornu aspersum	Heterobranchia	Eupulmonata	Stylommatophora	Helicoidea
24095036	2019-04-27 5:37:10 p. m. ART	2019-04-27	2019-04-27 20:37:10 UTC	Buenos Aires	1682244	micarodriguez		2019-04-30 01:21:54 UTC	2019-08-03 02:05:43 UTC	research	CC-BY-NC	https://www.inaturalist.org/observations/24095036	https://inaturalist-open-data.s3.amazonaws.com/photos/37262249/medium.jpeg				2	0	false	2	M. Melgar 5658, B1763 Virrey del Pino, Buenos Aires, Argentina	-348622894287	-58672706604								false	gps	gps		La Matanza	Buenos Aires	Argentina	Buenos Aires	La Matanza	Garden Snail	Cornu aspersum	caracol de jardÃ­n	Mollusca	480298	Cornu aspersum	Heterobranchia	Eupulmonata	Stylommatophora	Helicoidea
24098071	2019-04-29	2019-04-29		Buenos Aires	1664862	escuelaprimaria_azucena		2019-04-30 01:33:27 UTC	2019-12-05 20:03:23 UTC	research	CC-BY-NC	https://www.inaturalist.org/observations/24098071	https://inaturalist-open-data.s3.amazonaws.com/photos/37266766/medium.jpg				1	0	false		Tandil, Buenos Aires, Argentina	-373287999	-591367167	7275				7275			false				Tandil	Buenos Aires	Argentina	Buenos Aires	Tandil	Caracol europeo de jardÃ­n	Cornu aspersum	caracol de jardÃ­n	Mollusca	480298	Cornu aspersum	Heterobranchia	Eupulmonata	Stylommatophora	Helicoidea
24580814	2019-05-05 8:03:25 a. m. GMT-03:00	2019-05-05	2019-05-05 11:03:25 UTC	Brasilia	1720950	lucasandrada	Lucas Andrada	2019-05-05 11:20:45 UTC	2021-04-30 15:33:55 UTC	research		https://www.inaturalist.org/observations/24580814	https://static.inaturalist.org/photos/38010978/medium.jpeg				3	1	false	2	Tinogasta 6163, B1759DSK GonzÃ¡lez CatÃ¡n, Buenos Aires, Argentina	-34756942749	-586255569458								false	gps	gps		La Matanza	Buenos Aires	Argentina	Buenos Aires	La Matanza	Garden Snail	Cornu aspersum	caracol de jardÃ­n	Mollusca	480298	Cornu aspersum	Heterobranchia	Eupulmonata	Stylommatophora	Helicoidea
24836270	2019-05-08 17:15:00	2019-05-08		Buenos Aires	1667133	martinmartin	Martin	2019-05-09 14:22:21 UTC	2019-11-25 21:35:53 UTC	research	CC-BY	https://www.inaturalist.org/observations/24836270	https://inaturalist-open-data.s3.amazonaws.com/photos/38413769/medium.jpg				3	0	false		San Bernardo, Buenos Aires, Argentina	-366863655	-566791979	1199				1199			false				La Costa	Buenos Aires	Argentina	Buenos Aires	La Costa	Garden Snail	Cornu aspersum	caracol de jardÃ­n	Mollusca	480298	Cornu aspersum	Heterobranchia	Eupulmonata	Stylommatophora	Helicoidea
26114675	2017-01-03 10:49:00	2017-01-03		Buenos Aires	382941	lrubio7	Lucas Rubio	2019-05-31 14:16:10 UTC	2023-08-19 11:13:44 UTC	research	CC-BY	https://www.inaturalist.org/observations/26114675	https://inaturalist-open-data.s3.amazonaws.com/photos/40520240/medium.jpg				5	0	false		Mar del TuyÃº, Buenos Aires, Argentina	-365772887	-5668818	2913				2913			false				La Costa	Buenos Aires	Argentina	Buenos Aires	La Costa	Garden Snail	Cornu aspersum	caracol de jardÃ­n	Mollusca	480298	Cornu aspersum	Heterobranchia	Eupulmonata	Stylommatophora	Helicoidea
27054782	2018-12-26 10:00:00	2018-12-26	2018-12-26 13:00:00 UTC	Santiago	1879392	tandria		2019-06-15 23:13:25 UTC	2019-08-03 02:02:24 UTC	research	CC-BY-NC	https://www.inaturalist.org/observations/27054782	https://static.inaturalist.org/photos/42052668/medium.jpg				3	0	false		ItuzaingÃ³, Buenos Aires, Argentina	-346749049835	-58673625633	31				31			false				MorÃ³n	Buenos Aires	Argentina	Buenos Aires	MorÃ³n	Garden Snail	Cornu aspersum	caracol de jardÃ­n	Mollusca	480298	Cornu aspersum	Heterobranchia	Eupulmonata	Stylommatophora	Helicoidea
27067596	2017-02-02 08:15:00	2017-02-02		Buenos Aires	1509502	diego_t	Diego Trillo	2019-06-16 03:35:23 UTC	2019-06-25 20:26:58 UTC	research	CC-BY-NC	https://www.inaturalist.org/observations/27067596	https://inaturalist-open-data.s3.amazonaws.com/photos/42072566/medium.jpeg				2	0	false		Mar de AjÃ³, Buenos Aires, Argentina	-367325497583	-566738818159	410				410			false				La Costa	Buenos Aires	Argentina	Buenos Aires	La Costa	Garden Snail	Cornu aspersum	caracol de jardÃ­n	Mollusca	480298	Cornu aspersum	Heterobranchia	Eupulmonata	Stylommatophora	Helicoidea
27067695	2017-02-01 08:20:00	2017-02-01		Buenos Aires	1509502	diego_t	Diego Trillo	2019-06-16 03:36:18 UTC	2019-06-25 20:27:00 UTC	research	CC-BY-NC	https://www.inaturalist.org/observations/27067695	https://inaturalist-open-data.s3.amazonaws.com/photos/42073220/medium.jpeg				2	0	false		Mar de AjÃ³, Buenos Aires, Argentina	-367325497583	-566738818159	410				410			false				La Costa	Buenos Aires	Argentina	Buenos Aires	La Costa	Garden Snail	Cornu aspersum	caracol de jardÃ­n	Mollusca	480298	Cornu aspersum	Heterobranchia	Eupulmonata	Stylommatophora	Helicoidea
27182253	2017-04-14 08:57:00	2017-04-14		Buenos Aires	1509502	diego_t	Diego Trillo	2019-06-17 23:31:59 UTC	2019-08-03 01:59:55 UTC	research	CC-BY-NC	https://www.inaturalist.org/observations/27182253	https://inaturalist-open-data.s3.amazonaws.com/photos/42264068/medium.jpeg				5	0	false		Mar de AjÃ³, Buenos Aires, Argentina	-367325497583	-566738818159	410				410			false				La Costa	Buenos Aires	Argentina	Buenos Aires	La Costa	Garden Snail	Cornu aspersum	caracol de jardÃ­n	Mollusca	480298	Cornu aspersum	Heterobranchia	Eupulmonata	Stylommatophora	Helicoidea
27182256	2017-04-14 09:03:00	2017-04-14		Buenos Aires	1509502	diego_t	Diego Trillo	2019-06-17 23:32:01 UTC	2019-08-03 01:59:56 UTC	research	CC-BY-NC	https://www.inaturalist.org/observations/27182256	https://inaturalist-open-data.s3.amazonaws.com/photos/42264076/medium.jpeg				4	0	false		Mar de AjÃ³, Buenos Aires, Argentina	-367325497583	-566738818159	410				410			false				La Costa	Buenos Aires	Argentina	Buenos Aires	La Costa	Garden Snail	Cornu aspersum	caracol de jardÃ­n	Mollusca	480298	Cornu aspersum	Heterobranchia	Eupulmonata	Stylommatophora	Helicoidea
27757172	2014-01-02 13:11:00	2014-01-02		Buenos Aires	1861152	pafracas	Pablo AndrÃ©s Fracas	2019-06-27 15:12:22 UTC	2019-06-27 15:31:58 UTC	research		https://www.inaturalist.org/observations/27757172	https://static.inaturalist.org/photos/43221033/medium.jpeg				1	0	false		ChascomÃºs, Buenos Aires, Argentina	-355730783879	-580189710011	61				61			false				ChascomÃºs	Buenos Aires	Argentina	Buenos Aires	ChascomÃºs	Garden Snail	Cornu aspersum	caracol de jardÃ­n	Mollusca	480298	Cornu aspersum	Heterobranchia	Eupulmonata	Stylommatophora	Helicoidea
28491957	2017-03-18 08:55:00	2017-03-18		Buenos Aires	1383117	rguller	Roberto Guller	2019-07-09 12:25:06 UTC	2019-08-03 01:52:02 UTC	research	CC-BY-NC	https://www.inaturalist.org/observations/28491957	https://inaturalist-open-data.s3.amazonaws.com/photos/44418878/medium.jpg				2	0	false		AgronomÃ­a, CABA, Argentina	-34593029125	-584828984672	61				61			false				Distrito Federal	Ciudad de Buenos Aires	Argentina	Ciudad de Buenos Aires	Distrito Federal	Garden Snail	Cornu aspersum	caracol de jardÃ­n	Mollusca	480298	Cornu aspersum	Heterobranchia	Eupulmonata	Stylommatophora	Helicoidea
28502132	2016-04-16 13:56:00	2016-04-16		Buenos Aires	1861152	pafracas	Pablo AndrÃ©s Fracas	2019-07-09 15:55:13 UTC	2021-09-17 01:07:01 UTC	research		https://www.inaturalist.org/observations/28502132	https://static.inaturalist.org/photos/44434640/medium.jpeg				2	0	false		Gral Alvarado, Buenos Aires, Argentina	-382946155662	-578549653065	488				488			false				General Alvarado	Buenos Aires	Argentina	Buenos Aires	General Alvarado	Garden Snail	Cornu aspersum	caracol de jardÃ­n	Mollusca	480298	Cornu aspersum	Heterobranchia	Eupulmonata	Stylommatophora	Helicoidea
29202210	2018-11-30 11:32:00	2018-11-30		Buenos Aires	1383117	rguller	Roberto Guller	2019-07-20 22:06:43 UTC	2019-08-03 01:51:39 UTC	research	CC-BY-NC	https://www.inaturalist.org/observations/29202210	https://inaturalist-open-data.s3.amazonaws.com/photos/45563178/medium.jpg				3	0	false		AgronomÃ­a, CABA, Argentina	-34593029125	-584828984672	61				61			false				Distrito Federal	Ciudad de Buenos Aires	Argentina	Ciudad de Buenos Aires	Distrito Federal	Garden Snail	Cornu aspersum	caracol de jardÃ­n	Mollusca	480298	Cornu aspersum	Heterobranchia	Eupulmonata	Stylommatophora	Helicoidea
30015836	2014-05-17 18:43:00	2014-05-17		Buenos Aires	1368063	goncrisdi	Gonzalo Diaz	2019-08-02 01:02:16 UTC	2019-08-03 01:50:48 UTC	research	CC-BY-NC	https://www.inaturalist.org/observations/30015836	https://inaturalist-open-data.s3.amazonaws.com/photos/46872802/medium.jpeg				2	0	false		Punta Indio, Buenos Aires, Argentina	-352733185	-57247885	3393				3393			false				Magdalena	Buenos Aires	Argentina	Buenos Aires	Magdalena	Garden Snail	Cornu aspersum	caracol de jardÃ­n	Mollusca	480298	Cornu aspersum	Heterobranchia	Eupulmonata	Stylommatophora	Helicoidea
31120695	2019-08-18 10:58:00	2019-08-18		Santiago	1879392	tandria		2019-08-19 15:00:12 UTC	2019-08-21 04:49:14 UTC	research		https://www.inaturalist.org/observations/31120695	https://static.inaturalist.org/photos/48675658/medium.jpg				2	0	false		ItuzaingÃ³, Buenos Aires, Argentina	-346570243	-586753978	3765				3765			false				MorÃ³n	Buenos Aires	Argentina	Buenos Aires	MorÃ³n	Garden Snail	Cornu aspersum	caracol de jardÃ­n	Mollusca	480298	Cornu aspersum	Heterobranchia	Eupulmonata	Stylommatophora	Helicoidea
31452393	2012-10-27 14:49:00	2012-10-27		Buenos Aires	1368063	goncrisdi	Gonzalo Diaz	2019-08-25 03:19:53 UTC	2019-08-28 02:22:14 UTC	research	CC-BY-NC	https://www.inaturalist.org/observations/31452393	https://inaturalist-open-data.s3.amazonaws.com/photos/49225740/medium.jpeg				2	0	false		Laguna de Rocha, Buenos Aires Province, Argentina	-346930556	-606844444	1784				1784			false				Bragado	Buenos Aires	Argentina	Buenos Aires	Bragado	Garden Snail	Cornu aspersum	caracol de jardÃ­n	Mollusca	480298	Cornu aspersum	Heterobranchia	Eupulmonata	Stylommatophora	Helicoidea
31955753	2019-08-31 22:49:00	2019-08-31	2019-09-01 01:49:00 UTC	Buenos Aires	428443	tapi45	HUGO DAVID CAVERZASI	2019-09-02 00:22:10 UTC	2019-09-06 04:02:00 UTC	research	CC-BY-NC	https://www.inaturalist.org/observations/31955753	https://inaturalist-open-data.s3.amazonaws.com/photos/50068369/medium.jpeg				4	0	false		Las Varillas, CÃ³rdoba, Argentina	-318688166667	-627228166667								false				San Justo	CÃ³rdoba	Argentina	CÃ³rdoba	San Justo	Garden Snail	Cornu aspersum	caracol de jardÃ­n	Mollusca	480298	Cornu aspersum	Heterobranchia	Eupulmonata	Stylommatophora	Helicoidea
32052379	2016-09-04	2016-09-04		UTC	2152171	magaemilce	Magali Emilce	2019-09-03 14:43:35 UTC	2019-09-06 04:01:59 UTC	research		https://www.inaturalist.org/observations/32052379	https://static.inaturalist.org/photos/50233216/medium.jpg				2	0	false	2	San NicolÃ¡s Partido, Buenos Aires Province, Argentina	-33321616357	-602066800743	44615				44615			false	gps	gps		San NicolÃ¡s	Buenos Aires	Argentina	Buenos Aires	San NicolÃ¡s	Garden Snail	Cornu aspersum	caracol de jardÃ­n	Mollusca	480298	Cornu aspersum	Heterobranchia	Eupulmonata	Stylommatophora	Helicoidea
32278760	2019/09/05 5:04 PM UTC	2019-09-05		UTC	2197647	nstor8	NÃ©stor Trossero	2019-09-07 17:06:14 UTC	2019-09-09 21:00:59 UTC	research	CC0	https://www.inaturalist.org/observations/32278760	https://static.inaturalist.org/photos/50612298/medium.jpg				2	0	false		ParanÃ¡, Entre RÃ­os, Argentina	-317521810223	-604933583957	122				122			false				ParanÃ¡	Entre RÃ­os	Argentina	Entre RÃ­os	ParanÃ¡	Garden Snail	Cornu aspersum	caracol de jardÃ­n	Mollusca	480298	Cornu aspersum	Heterobranchia	Eupulmonata	Stylommatophora	Helicoidea
33339471	2019-09-23 11:14:10 AM GMT-03:00	2019-09-23	2019-09-23 14:14:10 UTC	Brasilia	1401709	nahue	Nahuel	2019-09-24 22:15:49 UTC	2021-10-28 09:50:30 UTC	research	CC-BY-NC	https://www.inaturalist.org/observations/33339471	https://inaturalist-open-data.s3.amazonaws.com/photos/52357907/medium.jpeg				4	0	false	2	Villa Soldati, CABA, Argentina	-34664393842	-584661882743	33				33			false	gps	gps		Distrito Federal	Ciudad de Buenos Aires	Argentina	Ciudad de Buenos Aires	Distrito Federal	Caracol europeo de jardÃ­n	Cornu aspersum	caracol de jardÃ­n	Mollusca	480298	Cornu aspersum	Heterobranchia	Eupulmonata	Stylommatophora	Helicoidea
34228420	2019-10-04 16:33:00	2019-10-04	2019-10-04 19:33:00 UTC	Buenos Aires	1458503	lorenazapata	Lorena Zapata	2019-10-12 01:24:45 UTC	2019-10-12 09:35:12 UTC	research	CC-BY-NC	https://www.inaturalist.org/observations/34228420	https://inaturalist-open-data.s3.amazonaws.com/photos/53842548/medium.jpg				2	0	false		Reserva EcolÃ³gica Costanera Sur, CABA, Argentina	-345967153552	-583609628852	40				40			false				Distrito Federal	Ciudad de Buenos Aires	Argentina	Ciudad de Buenos Aires	Distrito Federal	Garden Snail	Cornu aspersum	caracol de jardÃ­n	Mollusca	480298	Cornu aspersum	Heterobranchia	Eupulmonata	Stylommatophora	Helicoidea
35062163	2009-02-05 20:11:00	2009-02-05	2009-02-05 22:11:00 UTC	Mid-Atlantic	19893	walterprado	Walter S. Prado	2019-10-29 21:05:42 UTC	2023-06-28 22:52:38 UTC	research		https://www.inaturalist.org/observations/35062163	https://static.inaturalist.org/photos/55264424/medium.jpeg				3	0	false		Necochea Partido, Buenos Aires Province, Argentina	-385737928656	-58689554438	8				8			false				Necochea	Buenos Aires	Argentina	Buenos Aires	Necochea	Garden Snail	Cornu aspersum	caracol de jardÃ­n	Mollusca	480298	Cornu aspersum	Heterobranchia	Eupulmonata	Stylommatophora	Helicoidea
35165987	2019-10-30 10:19:00	2019-10-30	2019-10-30 13:19:00 UTC	Buenos Aires	1255162	romigaleota	Romi Galeota Lencina	2019-11-01 15:17:06 UTC	2021-10-28 15:30:43 UTC	research	CC-BY	https://www.inaturalist.org/observations/35165987	https://inaturalist-open-data.s3.amazonaws.com/photos/55421296/medium.jpeg				2	0	false		JosÃ© Marmol, Buenos Aires, Argentina	-347867754412	-583795198178	2				2			false				Almirante Brown	Buenos Aires	Argentina	Buenos Aires	Almirante Brown	Garden Snail	Cornu aspersum	caracol de jardÃ­n	Mollusca	480298	Cornu aspersum	Heterobranchia	Eupulmonata	Stylommatophora	Helicoidea
35849819	2019-11-18 04:23:00	2019-11-18	2019-11-18 07:23:00 UTC	Buenos Aires	1268934	diegocarau	Diego CarÃºs	2019-11-19 14:11:49 UTC	2021-11-21 18:55:59 UTC	research	CC0	https://www.inaturalist.org/observations/35849819	https://inaturalist-open-data.s3.amazonaws.com/photos/56582749/medium.jpeg				3	0	false		Magdalena, Buenos Aires, Argentina	-355607006055	-574245202546	61				61			false				Magdalena	Buenos Aires	Argentina	Buenos Aires	Magdalena	Caracol europeo de jardÃ­n	Cornu aspersum	caracol de jardÃ­n	Mollusca	480298	Cornu aspersum	Heterobranchia	Eupulmonata	Stylommatophora	Helicoidea
35950767	2019-11-17	2019-11-17		Hawaii	753960	belendri	MarÃ­a BelÃ©n Dri	2019-11-22 16:50:52 UTC	2022-02-02 22:20:36 UTC	research	CC-BY-NC	https://www.inaturalist.org/observations/35950767	https://inaturalist-open-data.s3.amazonaws.com/photos/56758376/medium.jpg				2	0	false		Magdalena, Buenos Aires, Argentina	-356069146567	-574246686967	3906				3906			false				Magdalena	Buenos Aires	Argentina	Buenos Aires	Magdalena	Garden Snail	Cornu aspersum	caracol de jardÃ­n	Mollusca	480298	Cornu aspersum	Heterobranchia	Eupulmonata	Stylommatophora	Helicoidea
35958509	2019-11-22 6:19:18 PM GMT-03:00	2019-11-22	2019-11-22 21:19:18 UTC	Brasilia	2331254	preli	Pablo Preliasco	2019-11-22 21:20:03 UTC	2022-02-02 22:20:38 UTC	research	CC-BY-NC	https://www.inaturalist.org/observations/35958509	https://inaturalist-open-data.s3.amazonaws.com/photos/56772923/medium.jpeg			Helix	6	0	false	2	Avenida Bernabe Marquez 5880-6200, Billinghurst, Buenos Aires, Argentina	-3456739241	-5858676036	6				6			false				General San MartÃ­n	Buenos Aires	Argentina	Buenos Aires	General San MartÃ­n	ãƒ’ãƒ¡ãƒªãƒ³ã‚´ãƒžã‚¤ãƒžã‚¤	Cornu aspersum	caracol de jardÃ­n	Mollusca	480298	Cornu aspersum	Heterobranchia	Eupulmonata	Stylommatophora	Helicoidea
35967938	2019/11/22 3:44 AM UTC	2019-11-22		UTC	2453465	educacionguardaparques	educacion guardaparques	2019-11-23 03:45:30 UTC	2021-10-28 09:43:16 UTC	research		https://www.inaturalist.org/observations/35967938	https://static.inaturalist.org/photos/56788852/medium.jpg				5	0	false		Gral PueyrredÃ³n, Buenos Aires, Argentina	-379467486347	-577226949025	977				977			false				General PueyrredÃ³n	Buenos Aires	Argentina	Buenos Aires	General PueyrredÃ³n	Caracol europeo de jardÃ­n	Cornu aspersum	caracol de jardÃ­n	Mollusca	480298	Cornu aspersum	Heterobranchia	Eupulmonata	Stylommatophora	Helicoidea
35985795	2019-11-23 10:59:18 AM GMT-03:00	2019-11-23	2019-11-23 13:59:18 UTC	Brasilia	1689137	tangara89		2019-11-23 18:48:52 UTC	2021-10-28 09:43:14 UTC	research	CC-BY-NC	https://www.inaturalist.org/observations/35985795	https://inaturalist-open-data.s3.amazonaws.com/photos/56821701/medium.jpeg				5	0	false	2	Parque Tres De Febrero	-345700110143	-584243008867	263				263			false	gps	gps		Distrito Federal	Ciudad de Buenos Aires	Argentina	Ciudad de Buenos Aires	Distrito Federal	Caracol europeo de jardÃ­n	Cornu aspersum	caracol de jardÃ­n	Mollusca	480298	Cornu aspersum	Heterobranchia	Eupulmonata	Stylommatophora	Helicoidea
35995385	2019-11-23 4:36:37 PM GMT-03:00	2019-11-23	2019-11-23 19:36:37 UTC	Buenos Aires	301307	ezequielvera	Ezequiel Vera	2019-11-23 23:22:17 UTC	2023-12-19 12:00:42 UTC	research	CC-BY	https://www.inaturalist.org/observations/35995385	https://inaturalist-open-data.s3.amazonaws.com/photos/56838540/medium.jpeg				3	0	false	2	Valeria del Mar, Buenos Aires, Argentina	-371405648434	-568987579644	294				294			false	gps	gps		Pinamar	Buenos Aires	Argentina	Buenos Aires	Pinamar	ãƒ’ãƒ¡ãƒªãƒ³ã‚´ãƒžã‚¤ãƒžã‚¤	Cornu aspersum	caracol de jardÃ­n	Mollusca	480298	Cornu aspersum	Heterobranchia	Eupulmonata	Stylommatophora	Helicoidea
36014113	2019-11-24 09:34:00	2019-11-24	2019-11-24 12:34:00 UTC	Brasilia	2452172	loreb	Lorena	2019-11-24 11:49:04 UTC	2022-02-02 22:20:46 UTC	research	CC-BY-NC	https://www.inaturalist.org/observations/36014113	https://inaturalist-open-data.s3.amazonaws.com/photos/56872782/medium.jpeg				5	0	false		Las Compuertas, Mendoza, Argentina	-330395979886	-689949983627	15				15			false				LujÃ¡n de Cuyo	Mendoza	Argentina	Mendoza	LujÃ¡n de Cuyo	ãƒ’ãƒ¡ãƒªãƒ³ã‚´ãƒžã‚¤ãƒžã‚¤	Cornu aspersum	caracol de jardÃ­n	Mollusca	480298	Cornu aspersum	Heterobranchia	Eupulmonata	Stylommatophora	Helicoidea
36017117	Sun Nov 24 2019 11:02:07 GMT-0300 (GMT-3)	2019-11-24	2019-11-24 14:02:07 UTC	Brasilia	2456673	monkey79		2019-11-24 14:09:39 UTC	2022-02-02 22:20:47 UTC	research	CC-BY-NC	https://www.inaturalist.org/observations/36017117	https://inaturalist-open-data.s3.amazonaws.com/photos/56878206/medium.jpg				4	0	false	3	Calle 117, La Plata, Buenos Aires, AR	-3491620333	-5792786167	5				5			false				La Plata	Buenos Aires	Argentina	Buenos Aires	La Plata	ãƒ’ãƒ¡ãƒªãƒ³ã‚´ãƒžã‚¤ãƒžã‚¤	Cornu aspersum	caracol de jardÃ­n	Mollusca	480298	Cornu aspersum	Heterobranchia	Eupulmonata	Stylommatophora	Helicoidea
[truncated: 2,638 more rows]
[truncated: 2 more columns]
