# Supplementary material for: Use and application of iNaturalist on land snails from Argentina
Source: PeerJ. 2025 Mar 17;13:e19152. doi: 10.7717/peerj.19152 (PMC11925043; doi:10.7717/peerj.19152)
Supplement: Supplemental Information 2 [file peerj-13-19152-s002.xlsx]

## Sheet: Hoja1
Order	Superfamily	Family	Identification at iNaturalist	Observation	Note	with visible soft parts	References
Stylommatophora	Helicoidea	Helicidae	Cornu aspersum	https://www.inaturalist.org/observations/208201600	interaction with another species	yes
Stylommatophora	Helicoidea	Helicidae	Cornu aspersum	https://www.inaturalist.org/observations/213840831	appears to be Helix pomatia	yes
Stylommatophora	Helicoidea	Helicidae	Cornu aspersum	https://www.inaturalist.org/observations/213866386	possibly a different species	yes
Stylommatophora	Helicoidea	Helicidae	Cornu aspersum	https://www.inaturalist.org/observations/213601591	possibly a different species	no
Stylommatophora	Helicoidea	Helicidae	Cornu aspersum	https://www.inaturalist.org/observations/198927907	possibly a different species	yes
Stylommatophora	Helicoidea	Helicidae	Cornu aspersum	https://www.inaturalist.org/observations/163736884	possibly a different species	yes
Stylommatophora	Helicoidea	Helicidae	Cornu aspersum	https://www.inaturalist.org/observations/134950623	possibly a different species	yes
Stylommatophora	Helicoidea	Helicidae	Cornu aspersum	https://www.inaturalist.org/observations/105855271	possibly a different species	no
Stylommatophora	Helicoidea	Helicidae	Cornu aspersum	https://www.inaturalist.org/observations/85422883	possibly a different species	yes
Stylommatophora	Achatinoidea	Achatinidae	Rumina decollata	https://www.inaturalist.org/observations/31748799	range extension (Santa Fé)	yes	Rau et al., 2022 (Buenos Aires, La Pampa, Mendoza, Córdoba, Chubut, Rio Negro, Misiones)
Stylommatophora	Achatinoidea	Achatinidae	Rumina decollata	https://www.inaturalist.org/observations/40143582	range extension (Santa Fé)	yes	Rau et al., 2022 (Buenos Aires, La Pampa, Mendoza, Córdoba, Chubut, Rio Negro, Misiones)
Stylommatophora	Achatinoidea	Achatinidae	Rumina decollata	https://www.inaturalist.org/observations/40167913	range extension (Santa Fé)	yes	Rau et al., 2022 (Buenos Aires, La Pampa, Mendoza, Córdoba, Chubut, Rio Negro, Misiones)
Stylommatophora	Achatinoidea	Achatinidae	Rumina decollata	https://www.inaturalist.org/observations/119730232	range extension (Santa Fé)	no	Rau et al., 2022 (Buenos Aires, La Pampa, Mendoza, Córdoba, Chubut, Rio Negro, Misiones)
Stylommatophora	Achatinoidea	Achatinidae	Rumina decollata	https://www.inaturalist.org/observations/140016403	range extension (Santa Fé)	yes	Rau et al., 2022 (Buenos Aires, La Pampa, Mendoza, Córdoba, Chubut, Rio Negro, Misiones)
Stylommatophora	Achatinoidea	Achatinidae	Rumina decollata	https://www.inaturalist.org/observations/160553356	range extension (Santa Fé)	yes	Rau et al., 2022 (Buenos Aires, La Pampa, Mendoza, Córdoba, Chubut, Rio Negro, Misiones)
Stylommatophora	Achatinoidea	Achatinidae	Rumina decollata	https://www.inaturalist.org/observations/195206411	range extension (Santa Fé)	yes	Rau et al., 2022 (Buenos Aires, La Pampa, Mendoza, Córdoba, Chubut, Rio Negro, Misiones)
Stylommatophora	Achatinoidea	Achatinidae	Rumina decollata	https://www.inaturalist.org/observations/142906079	range extension (San Juan)	no	Rau et al., 2022 (Buenos Aires, La Pampa, Mendoza, Córdoba, Chubut, Rio Negro, Misiones)
Stylommatophora	Achatinoidea	Achatinidae	Rumina decollata	https://www.inaturalist.org/observations/38738573	range extension (San Juan)	yes	Rau et al., 2022 (Buenos Aires, La Pampa, Mendoza, Córdoba, Chubut, Rio Negro, Misiones)
Stylommatophora	Achatinoidea	Achatinidae	Rumina decollata	https://www.inaturalist.org/observations/38601736	range extension (San Juan)	yes	Rau et al., 2022 (Buenos Aires, La Pampa, Mendoza, Córdoba, Chubut, Rio Negro, Misiones)
Stylommatophora	Achatinoidea	Achatinidae	Rumina decollata	https://www.inaturalist.org/observations/61476537	range extension (San Luis)	yes	Rau et al., 2022 (Buenos Aires, La Pampa, Mendoza, Córdoba, Chubut, Rio Negro, Misiones)
Stylommatophora	Achatinoidea	Achatinidae	Rumina decollata	https://www.inaturalist.org/observations/147947776	range extension (San Luis)	yes	Rau et al., 2022 (Buenos Aires, La Pampa, Mendoza, Córdoba, Chubut, Rio Negro, Misiones)
Stylommatophora	Achatinoidea	Achatinidae	Rumina decollata	https://www.inaturalist.org/observations/151952620	range extension (San Luis)	yes	Rau et al., 2022 (Buenos Aires, La Pampa, Mendoza, Córdoba, Chubut, Rio Negro, Misiones)
Stylommatophora	Achatinoidea	Achatinidae	Rumina decollata	https://www.inaturalist.org/observations/153752127	range extension (San Luis)	yes	Rau et al., 2022 (Buenos Aires, La Pampa, Mendoza, Córdoba, Chubut, Rio Negro, Misiones)
Stylommatophora	Achatinoidea	Achatinidae	Rumina decollata	https://www.inaturalist.org/observations/153762877	range extension (San Luis)	yes	Rau et al., 2022 (Buenos Aires, La Pampa, Mendoza, Córdoba, Chubut, Rio Negro, Misiones)
Stylommatophora	Achatinoidea	Achatinidae	Rumina decollata	https://www.inaturalist.org/observations/165187081	range extension (San Luis)	no	Rau et al., 2022 (Buenos Aires, La Pampa, Mendoza, Córdoba, Chubut, Rio Negro, Misiones)
Stylommatophora	Achatinoidea	Achatinidae	Rumina decollata	https://www.inaturalist.org/observations/201721894	range extension (San Luis)	yes	Rau et al., 2022 (Buenos Aires, La Pampa, Mendoza, Córdoba, Chubut, Rio Negro, Misiones)
Stylommatophora	Achatinoidea	Achatinidae	Rumina decollata	https://www.inaturalist.org/observations/147136371	range extension (Entre Rios)	no	Rau et al., 2022 (Buenos Aires, La Pampa, Mendoza, Córdoba, Chubut, Rio Negro, Misiones)
Stylommatophora	Achatinoidea	Achatinidae	Rumina decollata	https://www.inaturalist.org/observations/141840063	range extension (Entre Rios)	no	Rau et al., 2022 (Buenos Aires, La Pampa, Mendoza, Córdoba, Chubut, Rio Negro, Misiones)
Stylommatophora	Achatinoidea	Achatinidae	Rumina decollata	https://www.inaturalist.org/observations/97306973	range extension (Entre Rios)	no	Rau et al., 2022 (Buenos Aires, La Pampa, Mendoza, Córdoba, Chubut, Rio Negro, Misiones)
Stylommatophora	Achatinoidea	Achatinidae	Rumina decollata	https://www.inaturalist.org/observations/81755746	range extension (Entre Rios)	yes	Rau et al., 2022 (Buenos Aires, La Pampa, Mendoza, Córdoba, Chubut, Rio Negro, Misiones)
Stylommatophora	Limacoidea	Limacidae	Limacus flavus	https://www.inaturalist.org/observations/197168228	range extension (Mendoza)	yes	Virgillito, 2012 (Misiones, Tucumán, Corrientes, Córdoba, Buenos Aires, Neuquén, Río Negro, Chubut)
Stylommatophora	Limacoidea	Limacidae	Limacus flavus	https://www.inaturalist.org/observations/111864200	range extension (Mendoza)	yes	Virgillito, 2012 (Misiones, Tucumán, Corrientes, Córdoba, Buenos Aires, Neuquén, Río Negro, Chubut)
Stylommatophora	Limacoidea	Limacidae	Limacus flavus	https://www.inaturalist.org/observations/40183166	range extension (Mendoza)	yes	Virgillito, 2012 (Misiones, Tucumán, Corrientes, Córdoba, Buenos Aires, Neuquén, Río Negro, Chubut)
Stylommatophora	Limacoidea	Limacidae	Limacus flavus	https://www.inaturalist.org/observations/16922630	range extension (Santa Fé)	yes	Virgillito, 2012 (Misiones, Tucumán, Corrientes, Córdoba, Buenos Aires, Neuquén, Río Negro, Chubut)
Stylommatophora	Limacoidea	Limacidae	Limacus flavus	https://www.inaturalist.org/observations/16984898	range extension (Santa Fé)	yes	Virgillito, 2012 (Misiones, Tucumán, Corrientes, Córdoba, Buenos Aires, Neuquén, Río Negro, Chubut)
Stylommatophora	Limacoidea	Limacidae	Limacus flavus	https://www.inaturalist.org/observations/21306853	range extension (Santa Fé)	yes	Virgillito, 2012 (Misiones, Tucumán, Corrientes, Córdoba, Buenos Aires, Neuquén, Río Negro, Chubut)
Stylommatophora	Limacoidea	Limacidae	Limacus flavus	https://www.inaturalist.org/observations/21306856	range extension (Santa Fé)	yes	Virgillito, 2012 (Misiones, Tucumán, Corrientes, Córdoba, Buenos Aires, Neuquén, Río Negro, Chubut)
Stylommatophora	Limacoidea	Limacidae	Limacus flavus	https://www.inaturalist.org/observations/21306859	range extension (Santa Fé)	yes	Virgillito, 2012 (Misiones, Tucumán, Corrientes, Córdoba, Buenos Aires, Neuquén, Río Negro, Chubut)
Stylommatophora	Limacoidea	Limacidae	Limacus flavus	https://www.inaturalist.org/observations/43026165	range extension (Santa Fé)	yes	Virgillito, 2012 (Misiones, Tucumán, Corrientes, Córdoba, Buenos Aires, Neuquén, Río Negro, Chubut)
Stylommatophora	Limacoidea	Limacidae	Limacus flavus	https://www.inaturalist.org/observations/43029326	range extension (Santa Fé)	yes	Virgillito, 2012 (Misiones, Tucumán, Corrientes, Córdoba, Buenos Aires, Neuquén, Río Negro, Chubut)
Stylommatophora	Limacoidea	Limacidae	Limacus flavus	https://www.inaturalist.org/observations/60683685	range extension (Santa Fé)	yes	Virgillito, 2012 (Misiones, Tucumán, Corrientes, Córdoba, Buenos Aires, Neuquén, Río Negro, Chubut)
Stylommatophora	Limacoidea	Limacidae	Limacus flavus	https://www.inaturalist.org/observations/60772787	range extension (Santa Fé)	yes	Virgillito, 2012 (Misiones, Tucumán, Corrientes, Córdoba, Buenos Aires, Neuquén, Río Negro, Chubut)
Stylommatophora	Limacoidea	Limacidae	Limacus flavus	https://www.inaturalist.org/observations/68079415	range extension (Santa Fé)	yes	Virgillito, 2012 (Misiones, Tucumán, Corrientes, Córdoba, Buenos Aires, Neuquén, Río Negro, Chubut)
Stylommatophora	Limacoidea	Limacidae	Limacus flavus	https://www.inaturalist.org/observations/68706838	range extension (Santa Fé)	yes	Virgillito, 2012 (Misiones, Tucumán, Corrientes, Córdoba, Buenos Aires, Neuquén, Río Negro, Chubut)
Stylommatophora	Limacoidea	Limacidae	Limacus flavus	https://www.inaturalist.org/observations/98318666	range extension (Santa Fé)	yes	Virgillito, 2012 (Misiones, Tucumán, Corrientes, Córdoba, Buenos Aires, Neuquén, Río Negro, Chubut)
Stylommatophora	Limacoidea	Limacidae	Limacus flavus	https://www.inaturalist.org/observations/99339186	range extension (Santa Fé)	yes	Virgillito, 2012 (Misiones, Tucumán, Corrientes, Córdoba, Buenos Aires, Neuquén, Río Negro, Chubut)
Stylommatophora	Limacoidea	Limacidae	Limacus flavus	https://www.inaturalist.org/observations/104651469	range extension (Santa Fé)	yes	Virgillito, 2012 (Misiones, Tucumán, Corrientes, Córdoba, Buenos Aires, Neuquén, Río Negro, Chubut)
Stylommatophora	Limacoidea	Limacidae	Limacus flavus	https://www.inaturalist.org/observations/108199068	range extension (Santa Fé)	yes	Virgillito, 2012 (Misiones, Tucumán, Corrientes, Córdoba, Buenos Aires, Neuquén, Río Negro, Chubut)
Stylommatophora	Limacoidea	Limacidae	Limacus flavus	https://www.inaturalist.org/observations/132472661	range extension (Santa Fé)	yes	Virgillito, 2012 (Misiones, Tucumán, Corrientes, Córdoba, Buenos Aires, Neuquén, Río Negro, Chubut)
Stylommatophora	Limacoidea	Limacidae	Limacus flavus	https://www.inaturalist.org/observations/135988372	range extension (Santa Fé)	yes	Virgillito, 2012 (Misiones, Tucumán, Corrientes, Córdoba, Buenos Aires, Neuquén, Río Negro, Chubut)
Stylommatophora	Limacoidea	Limacidae	Limacus flavus	https://www.inaturalist.org/observations/138646174	range extension (Santa Fé)	yes	Virgillito, 2012 (Misiones, Tucumán, Corrientes, Córdoba, Buenos Aires, Neuquén, Río Negro, Chubut)
Stylommatophora	Limacoidea	Limacidae	Limacus flavus	https://www.inaturalist.org/observations/140217917	range extension (Santa Fé)	yes	Virgillito, 2012 (Misiones, Tucumán, Corrientes, Córdoba, Buenos Aires, Neuquén, Río Negro, Chubut)
Stylommatophora	Limacoidea	Limacidae	Limacus flavus	https://www.inaturalist.org/observations/144388447	range extension (Santa Fé)	yes	Virgillito, 2012 (Misiones, Tucumán, Corrientes, Córdoba, Buenos Aires, Neuquén, Río Negro, Chubut)
Stylommatophora	Limacoidea	Limacidae	Limacus flavus	https://www.inaturalist.org/observations/147076006	range extension (Santa Fé)	yes	Virgillito, 2012 (Misiones, Tucumán, Corrientes, Córdoba, Buenos Aires, Neuquén, Río Negro, Chubut)
Stylommatophora	Limacoidea	Limacidae	Limacus flavus	https://www.inaturalist.org/observations/152323901	range extension (Santa Fé)	yes	Virgillito, 2012 (Misiones, Tucumán, Corrientes, Córdoba, Buenos Aires, Neuquén, Río Negro, Chubut)
Stylommatophora	Limacoidea	Limacidae	Limacus flavus	https://www.inaturalist.org/observations/162389064	range extension (Santa Fé)	yes	Virgillito, 2012 (Misiones, Tucumán, Corrientes, Córdoba, Buenos Aires, Neuquén, Río Negro, Chubut)
Stylommatophora	Limacoidea	Limacidae	Limacus flavus	https://www.inaturalist.org/observations/189395570	range extension (Santa Fé)	yes	Virgillito, 2012 (Misiones, Tucumán, Corrientes, Córdoba, Buenos Aires, Neuquén, Río Negro, Chubut)
Stylommatophora	Limacoidea	Limacidae	Limacus flavus	https://www.inaturalist.org/observations/189817767	range extension (Santa Fé)	yes	Virgillito, 2012 (Misiones, Tucumán, Corrientes, Córdoba, Buenos Aires, Neuquén, Río Negro, Chubut)
Stylommatophora	Limacoidea	Limacidae	Limacus flavus	https://www.inaturalist.org/observations/189880608	range extension (Santa Fé)	yes	Virgillito, 2012 (Misiones, Tucumán, Corrientes, Córdoba, Buenos Aires, Neuquén, Río Negro, Chubut)
Stylommatophora	Limacoidea	Limacidae	Limacus flavus	https://www.inaturalist.org/observations/190464526	range extension (Santa Fé)	yes	Virgillito, 2012 (Misiones, Tucumán, Corrientes, Córdoba, Buenos Aires, Neuquén, Río Negro, Chubut)
Stylommatophora	Limacoidea	Limacidae	Limacus flavus	https://www.inaturalist.org/observations/194018004	range extension (Santa Fé)	yes	Virgillito, 2012 (Misiones, Tucumán, Corrientes, Córdoba, Buenos Aires, Neuquén, Río Negro, Chubut)
Stylommatophora	Limacoidea	Limacidae	Limacus flavus	https://www.inaturalist.org/observations/195533363	range extension (Santa Fé)	yes	Virgillito, 2012 (Misiones, Tucumán, Corrientes, Córdoba, Buenos Aires, Neuquén, Río Negro, Chubut)
Stylommatophora	Limacoidea	Limacidae	Limacus flavus	https://www.inaturalist.org/observations/195474717	range extension (La Pampa)	yes	Virgillito, 2012 (Misiones, Tucumán, Corrientes, Córdoba, Buenos Aires, Neuquén, Río Negro, Chubut)
Stylommatophora	Limacoidea	Limacidae	Limacus flavus	https://www.inaturalist.org/observations/190681956	range extension (La Pampa)	yes	Virgillito, 2012 (Misiones, Tucumán, Corrientes, Córdoba, Buenos Aires, Neuquén, Río Negro, Chubut)
Stylommatophora	Limacoidea	Limacidae	Limacus flavus	https://www.inaturalist.org/observations/96089691	range extension (La Pampa)	yes	Virgillito, 2012 (Misiones, Tucumán, Corrientes, Córdoba, Buenos Aires, Neuquén, Río Negro, Chubut)
Stylommatophora	Limacoidea	Limacidae	Limacus flavus	https://www.inaturalist.org/observations/79659980	range extension (La Pampa)	yes	Virgillito, 2012 (Misiones, Tucumán, Corrientes, Córdoba, Buenos Aires, Neuquén, Río Negro, Chubut)
Stylommatophora	Limacoidea	Limacidae	Limacus flavus	https://www.inaturalist.org/observations/34512234	range extension (La Pampa)	yes	Virgillito, 2012 (Misiones, Tucumán, Corrientes, Córdoba, Buenos Aires, Neuquén, Río Negro, Chubut)
Stylommatophora	Limacoidea	Limacidae	Limacus flavus	https://www.inaturalist.org/observations/37928099	range extension (La Pampa)	yes	Virgillito, 2012 (Misiones, Tucumán, Corrientes, Córdoba, Buenos Aires, Neuquén, Río Negro, Chubut)
Stylommatophora	Limacoidea	Limacidae	Limacus flavus	https://www.inaturalist.org/observations/40934438	range extension (La Pampa)	yes	Virgillito, 2012 (Misiones, Tucumán, Corrientes, Córdoba, Buenos Aires, Neuquén, Río Negro, Chubut)
Stylommatophora	Limacoidea	Limacidae	Limacus flavus	https://www.inaturalist.org/observations/43246454	range extension (La Pampa)	yes	Virgillito, 2012 (Misiones, Tucumán, Corrientes, Córdoba, Buenos Aires, Neuquén, Río Negro, Chubut)
Stylommatophora	Limacoidea	Limacidae	Limacus flavus	https://www.inaturalist.org/observations/59089822	range extension (La Pampa)	yes	Virgillito, 2012 (Misiones, Tucumán, Corrientes, Córdoba, Buenos Aires, Neuquén, Río Negro, Chubut)
Stylommatophora	Limacoidea	Limacidae	Limacus flavus	https://www.inaturalist.org/observations/99799035	range extension (La Pampa)	yes	Virgillito, 2012 (Misiones, Tucumán, Corrientes, Córdoba, Buenos Aires, Neuquén, Río Negro, Chubut)
Stylommatophora	Limacoidea	Limacidae	Limacus flavus	https://www.inaturalist.org/observations/116023986	range extension (La Pampa)	yes	Virgillito, 2012 (Misiones, Tucumán, Corrientes, Córdoba, Buenos Aires, Neuquén, Río Negro, Chubut)
Stylommatophora	Limacoidea	Limacidae	Limacus flavus	https://www.inaturalist.org/observations/128876729	range extension (La Pampa)	yes	Virgillito, 2012 (Misiones, Tucumán, Corrientes, Córdoba, Buenos Aires, Neuquén, Río Negro, Chubut)
Stylommatophora	Limacoidea	Limacidae	Limacus flavus	https://www.inaturalist.org/observations/167124446	range extension (La Pampa)	yes	Virgillito, 2012 (Misiones, Tucumán, Corrientes, Córdoba, Buenos Aires, Neuquén, Río Negro, Chubut)
Stylommatophora	Limacoidea	Limacidae	Limacus flavus	https://www.inaturalist.org/observations/192545035	range extension (La Pampa)	yes	Virgillito, 2012 (Misiones, Tucumán, Corrientes, Córdoba, Buenos Aires, Neuquén, Río Negro, Chubut)
Stylommatophora	Limacoidea	Limacidae	Limacus flavus	https://www.inaturalist.org/observations/146310822	range extension (La Pampa)	yes	Virgillito, 2012 (Misiones, Tucumán, Corrientes, Córdoba, Buenos Aires, Neuquén, Río Negro, Chubut)
Stylommatophora	Limacoidea	Limacidae	Limacus flavus	https://www.inaturalist.org/observations/36953736	range extension (Salta)	yes	Virgillito, 2012 (Misiones, Tucumán, Corrientes, Córdoba, Buenos Aires, Neuquén, Río Negro, Chubut)
Stylommatophora	Limacoidea	Limacidae	Limacus flavus	https://www.inaturalist.org/observations/74209934	range extension (Salta)	yes	Virgillito, 2012 (Misiones, Tucumán, Corrientes, Córdoba, Buenos Aires, Neuquén, Río Negro, Chubut)
Stylommatophora	Limacoidea	Limacidae	Limacus flavus	https://www.inaturalist.org/observations/105226660	range extension (Salta)	yes	Virgillito, 2012 (Misiones, Tucumán, Corrientes, Córdoba, Buenos Aires, Neuquén, Río Negro, Chubut)
Stylommatophora	Helicoidea	Helicidae	Otala punctata	https://www.inaturalist.org/observations/9474308	range extension (Chubut)	yes	Virgillito, 2012 (Jujuy, Catamarca, Tucumán, Entre Ríos, Buenos Aires)
Stylommatophora	Helicoidea	Helicidae	Otala punctata	https://www.inaturalist.org/observations/35964862	range extension (Chubut)	no	Virgillito, 2012 (Jujuy, Catamarca, Tucumán, Entre Ríos, Buenos Aires)
Stylommatophora	Helicoidea	Helicidae	Otala punctata	https://www.inaturalist.org/observations/38393033	range extension (Chubut)	no	Virgillito, 2012 (Jujuy, Catamarca, Tucumán, Entre Ríos, Buenos Aires)
Stylommatophora	Helicoidea	Helicidae	Otala punctata	https://www.inaturalist.org/observations/93524076	range extension (Chubut)	no	Virgillito, 2012 (Jujuy, Catamarca, Tucumán, Entre Ríos, Buenos Aires)
Stylommatophora	Helicoidea	Helicidae	Otala punctata	https://www.inaturalist.org/observations/103051857	range extension (Chubut)	yes	Virgillito, 2012 (Jujuy, Catamarca, Tucumán, Entre Ríos, Buenos Aires)
Stylommatophora	Helicoidea	Helicidae	Otala punctata	https://www.inaturalist.org/observations/105424776	range extension (Chubut)	no	Virgillito, 2012 (Jujuy, Catamarca, Tucumán, Entre Ríos, Buenos Aires)
Stylommatophora	Helicoidea	Helicidae	Otala punctata	https://www.inaturalist.org/observations/106460753	range extension (Chubut)	yes	Virgillito, 2012 (Jujuy, Catamarca, Tucumán, Entre Ríos, Buenos Aires)
Stylommatophora	Helicoidea	Helicidae	Otala punctata	https://www.inaturalist.org/observations/111746295	range extension (Chubut)	yes	Virgillito, 2012 (Jujuy, Catamarca, Tucumán, Entre Ríos, Buenos Aires)
Stylommatophora	Helicoidea	Helicidae	Otala punctata	https://www.inaturalist.org/observations/140095541	range extension (Chubut)	no	Virgillito, 2012 (Jujuy, Catamarca, Tucumán, Entre Ríos, Buenos Aires)
Stylommatophora	Helicoidea	Helicidae	Otala punctata	https://www.inaturalist.org/observations/140178888	range extension (Chubut)	no	Virgillito, 2012 (Jujuy, Catamarca, Tucumán, Entre Ríos, Buenos Aires)
Stylommatophora	Helicoidea	Helicidae	Otala punctata	https://www.inaturalist.org/observations/147482484	range extension (Chubut)	yes	Virgillito, 2012 (Jujuy, Catamarca, Tucumán, Entre Ríos, Buenos Aires)
Stylommatophora	Helicoidea	Helicidae	Otala punctata	https://www.inaturalist.org/observations/147665141	range extension (Chubut)	yes	Virgillito, 2012 (Jujuy, Catamarca, Tucumán, Entre Ríos, Buenos Aires)
Stylommatophora	Helicoidea	Helicidae	Otala punctata	https://www.inaturalist.org/observations/150711739	range extension (Chubut)	no	Virgillito, 2012 (Jujuy, Catamarca, Tucumán, Entre Ríos, Buenos Aires)
Stylommatophora	Helicoidea	Helicidae	Otala punctata	https://www.inaturalist.org/observations/152945086	range extension (Chubut)	no	Virgillito, 2012 (Jujuy, Catamarca, Tucumán, Entre Ríos, Buenos Aires)
Stylommatophora	Helicoidea	Helicidae	Otala punctata	https://www.inaturalist.org/observations/157408877	range extension (Chubut)	no	Virgillito, 2012 (Jujuy, Catamarca, Tucumán, Entre Ríos, Buenos Aires)
Stylommatophora	Helicoidea	Helicidae	Otala punctata	https://www.inaturalist.org/observations/43396838	range extension (Río Negro)	yes	Virgillito, 2012 (Jujuy, Catamarca, Tucumán, Entre Ríos, Buenos Aires)
Stylommatophora	Helicoidea	Helicidae	Otala punctata	https://www.inaturalist.org/observations/44819607	range extension (Río Negro)	no	Virgillito, 2012 (Jujuy, Catamarca, Tucumán, Entre Ríos, Buenos Aires)
Stylommatophora	Helicoidea	Helicidae	Otala punctata	https://www.inaturalist.org/observations/67863223	range extension (Río Negro)	yes	Virgillito, 2012 (Jujuy, Catamarca, Tucumán, Entre Ríos, Buenos Aires)
Stylommatophora	Helicoidea	Helicidae	Otala punctata	https://www.inaturalist.org/observations/87398449	range extension (Río Negro)	yes	Virgillito, 2012 (Jujuy, Catamarca, Tucumán, Entre Ríos, Buenos Aires)
Stylommatophora	Helicoidea	Helicidae	Otala punctata	https://www.inaturalist.org/observations/111939949	range extension (Río Negro)	no	Virgillito, 2012 (Jujuy, Catamarca, Tucumán, Entre Ríos, Buenos Aires)
Stylommatophora	Helicoidea	Helicidae	Otala punctata	https://www.inaturalist.org/observations/196400908	range extension (Río Negro)	no	Virgillito, 2012 (Jujuy, Catamarca, Tucumán, Entre Ríos, Buenos Aires)
Stylommatophora	Helicoidea	Helicidae	Otala punctata	https://www.inaturalist.org/observations/197101716	range extension (Río Negro)	no	Virgillito, 2012 (Jujuy, Catamarca, Tucumán, Entre Ríos, Buenos Aires)
Stylommatophora	Helicoidea	Helicidae	Otala punctata	https://www.inaturalist.org/observations/205795318	range extension (Río Negro)	yes	Virgillito, 2012 (Jujuy, Catamarca, Tucumán, Entre Ríos, Buenos Aires)
Stylommatophora	Helicoidea	Helicidae	Otala punctata	https://www.inaturalist.org/observations/40884753	range extension (Santa Cruz)	yes	Virgillito, 2012 (Jujuy, Catamarca, Tucumán, Entre Ríos, Buenos Aires)
Stylommatophora	Helicoidea	Helicidae	Otala punctata	https://www.inaturalist.org/observations/150758004	range extension (Santa Cruz)	no	Virgillito, 2012 (Jujuy, Catamarca, Tucumán, Entre Ríos, Buenos Aires)
Stylommatophora	Helicoidea	Helicidae	Otala punctata	https://www.inaturalist.org/observations/103484484	range extension (Mendoza)	no	Virgillito, 2012 (Jujuy, Catamarca, Tucumán, Entre Ríos, Buenos Aires)
Stylommatophora	Helicoidea	Helicidae	Otala punctata	https://www.inaturalist.org/observations/144633430	range extension (Mendoza)	yes	Virgillito, 2012 (Jujuy, Catamarca, Tucumán, Entre Ríos, Buenos Aires)
Stylommatophora	Helicoidea	Helicidae	Otala punctata	https://www.inaturalist.org/observations/190344800	range extension (Mendoza)	no	Virgillito, 2012 (Jujuy, Catamarca, Tucumán, Entre Ríos, Buenos Aires)
Stylommatophora	Helicoidea	Helicidae	Otala punctata	https://www.inaturalist.org/observations/73517556	range extension (La Pampa)	yes	Virgillito, 2012 (Jujuy, Catamarca, Tucumán, Entre Ríos, Buenos Aires)
Stylommatophora	Helicoidea	Helicidae	Otala punctata	https://www.inaturalist.org/observations/76126222	range extension (La Pampa)	no	Virgillito, 2012 (Jujuy, Catamarca, Tucumán, Entre Ríos, Buenos Aires)
Stylommatophora	Helicoidea	Helicidae	Otala punctata	https://www.inaturalist.org/observations/104670857	range extension (La Pampa)	no	Virgillito, 2012 (Jujuy, Catamarca, Tucumán, Entre Ríos, Buenos Aires)
Stylommatophora	Helicoidea	Helicidae	Otala punctata	https://www.inaturalist.org/observations/113546083	range extension (La Pampa)	no	Virgillito, 2012 (Jujuy, Catamarca, Tucumán, Entre Ríos, Buenos Aires)
Stylommatophora	Helicoidea	Helicidae	Otala punctata	https://www.inaturalist.org/observations/114637124	range extension (La Pampa)	yes	Virgillito, 2012 (Jujuy, Catamarca, Tucumán, Entre Ríos, Buenos Aires)
Stylommatophora	Helicoidea	Helicidae	Otala punctata	https://www.inaturalist.org/observations/134480579	range extension (Neuquén)	no	Virgillito, 2012 (Jujuy, Catamarca, Tucumán, Entre Ríos, Buenos Aires)
Stylommatophora	Helicoidea	Helicidae	Otala lactea	https://www.inaturalist.org/observations/23460493	range extension (Mendoza)	no	Doering, 1874; 1875; Virgillito, 2012 (Santa Fe, Misiones, Tucumán, Córdoba, Entre Ríos, Buenos Aires, Río Negro, Santa Cruz)
Stylommatophora	Helicoidea	Camaenidae	Bradybaena similaris	https://www.inaturalist.org/observations/43927118	range extension (Santa Fé)	yes	Virgillito & Miquel, 2013; Sernioti et al., 2019 (Misiones, Tucumán, Entre Ríos)
Stylommatophora	Helicoidea	Camaenidae	Bradybaena similaris	https://www.inaturalist.org/observations/105685120	range extension (Santa Fé)	no	Virgillito & Miquel, 2013; Sernioti et al., 2019 (Misiones, Tucumán, Entre Ríos)
Stylommatophora	Helicoidea	Camaenidae	Bradybaena similaris	https://www.inaturalist.org/observations/109316945	range extension (Buenos Aires)	no	Virgillito & Miquel, 2013; Sernioti et al., 2019 (Misiones, Tucumán, Entre Ríos)
Stylommatophora	Limacoidea	Agriolimacidae	Deroceras reticulatum	https://www.inaturalist.org/observations/37950690	range extension (Neuquén)	yes	Fernández, 1973; Virgillito & Miquel, 2013 (Tucumán, Buenos Aires, Neuquén, Río Negro, Chubut and Tierra del Fuego)
Stylommatophora	Limacoidea	Agriolimacidae	Deroceras reticulatum	https://www.inaturalist.org/observations/85825934	range extension (Neuquén)	yes	Fernández, 1973; Virgillito & Miquel, 2013 (Tucumán, Buenos Aires, Neuquén, Río Negro, Chubut and Tierra del Fuego)
Stylommatophora	Limacoidea	Agriolimacidae	Deroceras reticulatum	https://www.inaturalist.org/observations/90565955	range extension (Neuquén)	yes	Fernández, 1973; Virgillito & Miquel, 2013 (Tucumán, Buenos Aires, Neuquén, Río Negro, Chubut and Tierra del Fuego)
Stylommatophora	Limacoidea	Agriolimacidae	Deroceras reticulatum	https://www.inaturalist.org/observations/155462544	range extension (Neuquén)	yes	Fernández, 1973; Virgillito & Miquel, 2013 (Tucumán, Buenos Aires, Neuquén, Río Negro, Chubut and Tierra del Fuego)
Stylommatophora	Limacoidea	Agriolimacidae	Deroceras reticulatum	https://www.inaturalist.org/observations/116364257	range extension (La Pampa)	yes	Fernández, 1973; Virgillito & Miquel, 2013 (Tucumán, Buenos Aires, Neuquén, Río Negro, Chubut and Tierra del Fuego)
Stylommatophora	Limacoidea	Limacidae	Limax maximus	https://www.inaturalist.org/observations/36494585	range extension (Chubut)	yes	Fernández, 1973; Virgillito & Miquel, 2013 (Neuquén and Río Negro)
Stylommatophora	Limacoidea	Limacidae	Limax maximus	https://www.inaturalist.org/observations/40858822	range extension (Buenos Aires)	yes	Fernández, 1973; Virgillito & Miquel, 2013 (Neuquén and Río Negro)
Stylommatophora	Limacoidea	Limacidae	Limax maximus	https://www.inaturalist.org/observations/67731794	range extension (Buenos Aires)	yes	Fernández, 1973; Virgillito & Miquel, 2013 (Neuquén and Río Negro)
Stylommatophora	Limacoidea	Limacidae	Limax maximus	https://www.inaturalist.org/observations/100742940	range extension (Buenos Aires)	yes	Fernández, 1973; Virgillito & Miquel, 2013 (Neuquén and Río Negro)
Stylommatophora	Gastrodontoidea	Oxychilidae	Oxychilus cellarius	https://www.inaturalist.org/observations/181106632	collection required for precise identification	yes
Stylommatophora	Gastrodontoidea	Oxychilidae	Oxychilus alliarius	https://www.inaturalist.org/observations/205839698	collection required for precise identification	yes
Stylommatophora	Gastrodontoidea	Oxychilidae	Oxychilus draparnaudi	https://www.inaturalist.org/observations/36047363	cited and registered in Buenos Aires	yes	Virgillito & Miquel, 2013; Díaz et al., en prensa (Buenos Aires)
Stylommatophora	Gastrodontoidea	Oxychilidae	Oxychilus draparnaudi	https://www.inaturalist.org/observations/43489596	cited and registered in Buenos Aires	yes	Virgillito & Miquel, 2013; Díaz et al., en prensa (Buenos Aires)
Stylommatophora	Limacoidea	Agriolimacidae	Deroceras laeve	https://www.inaturalist.org/observations/67675773	range extension (Santa Fé)	yes	Reviriego et al., 1989; Costamagna et al., 2002 (Buenos Aires and La Pampa)
Stylommatophora	Limacoidea	Milacidae	Milax gagates	https://www.inaturalist.org/observations/37889951	range extension (Neuquén)	yes	Virgillito, 2012 (Buenos Aires, Río Negro)
Stylommatophora	Limacoidea	Agriolimacidae	Deroceras invadens	https://www.inaturalist.org/observations/25575358	range extension (Buenos Aires)	yes	Gutierrez et al., 2013 (Neuquen, Río Negro, Chubut)
Stylommatophora	Limacoidea	Agriolimacidae	Deroceras invadens	https://www.inaturalist.org/observations/42194446	range extension (Buenos Aires)	yes	Gutierrez et al., 2013 (Neuquen, Río Negro, Chubut)
Stylommatophora	Limacoidea	Agriolimacidae	Deroceras invadens	https://www.inaturalist.org/observations/106078565	range extension (Buenos Aires)	yes	Gutierrez et al., 2013 (Neuquen, Río Negro, Chubut)
Stylommatophora	Arionoidea	Arionidae	Arion intermedius	https://www.inaturalist.org/observations/107316714	range extension (Neuquén)	yes	Virgillito, 2012; Gutierrez et al., 2013 (Río negro y Chubut)
Stylommatophora	Arionoidea	Arionidae	Arion intermedius	https://www.inaturalist.org/observations/111592930	range extension (Neuquén)	yes	Virgillito, 2012; Gutierrez et al., 2013 (Río negro y Chubut)
Stylommatophora	Arionoidea	Arionidae	Arion intermedius	https://www.inaturalist.org/observations/220995679	range extension (Neuquén)	yes	Virgillito, 2012; Gutierrez et al., 2013 (Río negro y Chubut)
Stylommatophora	Arionoidea	Arionidae	Arion intermedius	https://www.inaturalist.org/observations/113164084	range extension (Tierra del Fuego)	yes	Virgillito, 2012; Gutierrez et al., 2013 (Río negro y Chubut)
Stylommatophora	Gastrodontoidea	Gastrodontidae	Zonitoidessp.	https://www.inaturalist.org/observations/100015749	range extension (Santa Fe)	yes	Virgillito, 2012 (Jujuy, Salta, Catamarca, Tucumán, Misiones, Corrientes, Santiago del Estero, Córdoba, Entre Ríos, Buenos Aires)
Stylommatophora	Gastrodontoidea	Gastrodontidae	Zonitoidessp.	https://www.inaturalist.org/observations/105990624	range extension (Río Negro)	no	Virgillito, 2012 (Tucumán, Catamarca, Misiones, Corrientes, Entre Ríos, La Pampa y Buenos Aires)
Stylommatophora	Achatinoidea	Achatinidae	Allopeas gracile	https://www.inaturalist.org/observations/57588360	within known range (Buenos Aires)	yes	Virgillito, 2012 (Jujuy, Salta, Catamarca, Tucumán, Misiones, Corrientes, Santiago del Estero, Córdoba, Entre Ríos, Buenos Aires)
Stylommatophora	Achatinoidea	Achatinidae	Allopeas gracile	https://www.inaturalist.org/observations/149044401	within known range (Buenos Aires)	no	Virgillito, 2012 (Jujuy, Salta, Catamarca, Tucumán, Misiones, Corrientes, Santiago del Estero, Córdoba, Entre Ríos, Buenos Aires)
Stylommatophora	Achatinoidea	Achatinidae	Allopeas gracile	https://www.inaturalist.org/observations/192783810	within known range (Corrientes)	yes	Virgillito, 2012 (Jujuy, Salta, Catamarca, Tucumán, Misiones, Corrientes, Santiago del Estero, Córdoba, Entre Ríos, Buenos Aires)
Stylommatophora	Achatinoidea	Achatinidae	Allopeas gracile	https://www.inaturalist.org/observations/116894775	within known range (Entre Ríos)	yes	Virgillito, 2012 (Jujuy, Salta, Catamarca, Tucumán, Misiones, Corrientes, Santiago del Estero, Córdoba, Entre Ríos, Buenos Aires)
Stylommatophora	Gastrodontoidea	Pristilomatidae	Hawaiia minuscula	https://www.inaturalist.org/observations/44215907	within known range (Buenos Aires)	no	Miquel et al., 2007; Rumi et al ., 2010; Virgillito & Miquel, 2013 (Jujuy, Salta, Tucumán, Catamarca, Córdoba and Buenos Aires)
Stylommatophora	Gastrodontoidea	Pristilomatidae	Hawaiia minuscula	https://www.inaturalist.org/observations/140772614	within known range (Buenos Aires)	no	Miquel et al., 2007; Rumi et al ., 2010; Virgillito & Miquel, 2013 (Jujuy, Salta, Tucumán, Catamarca, Córdoba and Buenos Aires)
Systellommatophora	Veronicelloidea	Veronicellidae	Sarasinula linguaeformis	https://www.inaturalist.org/observations/68581591	within known range (Misiones)	yes	Santin & Miquel, 2015 (Tucumán, Misiones, Corrientes)
Systellommatophora	Veronicelloidea	Veronicellidae	Sarasinula linguaeformis	https://www.inaturalist.org/observations/202885026	within known range (Misiones)	yes	Santin & Miquel, 2015 (Tucumán, Misiones, Corrientes)
Systellommatophora	Veronicelloidea	Veronicellidae	Sarasinula linguaeformis	https://www.inaturalist.org/observations/202885027	within known range (Misiones)	yes	Santin & Miquel, 2015 (Tucumán, Misiones, Corrientes)
Stylommatophora	Pupilloidea	Enidae	Merdigera obscura	https://www.inaturalist.org/observations/209964103	collection required for precise identification	no
Stylommatophora	Helicoidea	Geomitridae	Cochlicella sp.	https://www.inaturalist.org/observations/140362256	collection required for precise identification	no
Stylommatophora	Trochomorphoidea	Euconulidae	Euconulus sp.	https://www.inaturalist.org/observations/134796118	collection required for precise identification	no
Stylommatophora	Pupilloidea	Valloniidae	Vallonia pulchella	https://www.inaturalist.org/observations/191307384	extension range (Santa Fé)	yes	Rumi et al., 2010; Virgillito, 2012 (Jujuy, Buenos Aires, La Rioja and Salta)
Stylommatophora	Pupilloidea	Lauriidae	Lauria cylindracea	https://www.inaturalist.org/observations/87159107	collection required for precise identification	no
Stylommatophora	Limacoidea	Vitrinidae	Vitrina pellucida	https://www.inaturalist.org/observations/112667836	within known range (Tierra del Fuego)	yes	Cuezzo & Dellagnola, 2024 (Tierra del Fuego)
Stylommatophora	Streptaxoidea	Streptaxidae	Rectartemon candidus	https://www.inaturalist.org/observations/89826939	collection is required to contribute to the knowledge of its distribution.	yes
Stylommatophora	Limacoidea	Limacidae	Ambigolimax parvipenis	https://www.inaturalist.org/observations/202705570	collection required for precise identification	yes
Stylommatophora	Orthalicoidea	Bulimulidae	Mesembrinus gereti	https://www.inaturalist.org/observations/148479710	possible new registration for Argentina	yes
Architaenioglossa	Cyclophoroidea	Neocyclotidae	Amphicyclotussp.	https://www.inaturalist.org/observations/137231266	collection required for precise identification	no
Systellommatophora	Veronicelloidea	Veronicellidae	Laevicaulis alte	https://www.inaturalist.org/observations/92670155	possible first registration (Buenos Aires)	yes
Systellommatophora	Veronicelloidea	Veronicellidae	Laevicaulis alte	https://www.inaturalist.org/observations/38506963	possible first registration (Buenos Aires)	yes
Stylommatophora	Orthalicoidea	Bulimulidae	Bulimulus bonariensis	https://www.inaturalist.org/observations/196730052	potential new species (Santa Fe)	yes
Stylommatophora	Orthalicoidea	Bulimulidae	Bulimulus bonariensis	https://www.inaturalist.org/observations/190690046	potential new species (Buenos Aires)	yes
Stylommatophora	Orthalicoidea	Bulimulidae	Bulimulus bonariensis	https://www.inaturalist.org/observations/186089211	potential new species (Formosa)	no
Stylommatophora	Orthalicoidea	Bulimulidae	Bulimulus bonariensis	https://www.inaturalist.org/observations/150745443	potential new species (Córdoba)	no
Stylommatophora	Orthalicoidea	Bulimulidae	Bulimulus bonariensis	https://www.inaturalist.org/observations/144179586	potential new species (Entre Rios)	no
Stylommatophora	Orthalicoidea	Bulimulidae	Bulimulus bonariensis	https://www.inaturalist.org/observations/117795783	potential new species (Buenos Aires)	no
Stylommatophora	Orthalicoidea	Bulimulidae	Bulimulus bonariensis	https://www.inaturalist.org/observations/48124517	potential new species (Buenos Aires)	no
Stylommatophora	Orthalicoidea	Bulimulidae	Bulimulus bonariensis	https://www.inaturalist.org/observations/39382182	potential new species (Buenos Aires)	yes
Stylommatophora	Orthalicoidea	Bulimulidae	Bulimulus bonariensis	https://www.inaturalist.org/observations/105358396	potential new species (Tucumán)	yes
Systellommatophora	Veronicelloidea	Veronicellidae	Phyllocaulis soleiformis	https://www.inaturalist.org/observations/22817104	range extension (San Luis)	yes	Santin & Miquel, 2015 (Buenos Aires, Misiones, Jujuy, Salta, Tucumán, La Rioja, Catamarca, Chaco, Santiago del Estero, Corrientes, Córdoba, Mendoza, Santa Fe, Entre Ríos)
Systellommatophora	Veronicelloidea	Veronicellidae	Phyllocaulis soleiformis	https://www.inaturalist.org/observations/199238506	range extension (San Luis)	yes	Santin & Miquel, 2015 (Buenos Aires, Misiones, Jujuy, Salta, Tucumán, La Rioja, Catamarca, Chaco, Santiago del Estero, Corrientes, Córdoba, Mendoza, Santa Fe, Entre Ríos)
Systellommatophora	Veronicelloidea	Veronicellidae	Phyllocaulis soleiformis	https://www.inaturalist.org/observations/105359519	range extension (La Pampa)	yes	Santin & Miquel, 2015 (Buenos Aires, Misiones, Jujuy, Salta, Tucumán, La Rioja, Catamarca, Chaco, Santiago del Estero, Corrientes, Córdoba, Mendoza, Santa Fe, Entre Ríos)
Systellommatophora	Veronicelloidea	Veronicellidae	Phyllocaulis soleiformis	https://www.inaturalist.org/observations/116154033	range extension (La Pampa)	yes	Santin & Miquel, 2015 (Buenos Aires, Misiones, Jujuy, Salta, Tucumán, La Rioja, Catamarca, Chaco, Santiago del Estero, Corrientes, Córdoba, Mendoza, Santa Fe, Entre Ríos)
Systellommatophora	Veronicelloidea	Veronicellidae	Phyllocaulis soleiformis	https://www.inaturalist.org/observations/116154334	range extension (La Pampa)	yes	Santin & Miquel, 2015 (Buenos Aires, Misiones, Jujuy, Salta, Tucumán, La Rioja, Catamarca, Chaco, Santiago del Estero, Corrientes, Córdoba, Mendoza, Santa Fe, Entre Ríos)
Systellommatophora	Veronicelloidea	Veronicellidae	Phyllocaulis soleiformis	https://www.inaturalist.org/observations/192507791	range extension (La Pampa)	yes	Santin & Miquel, 2015 (Buenos Aires, Misiones, Jujuy, Salta, Tucumán, La Rioja, Catamarca, Chaco, Santiago del Estero, Corrientes, Córdoba, Mendoza, Santa Fe, Entre Ríos)
Systellommatophora	Veronicelloidea	Veronicellidae	Phyllocaulis soleiformis	https://www.inaturalist.org/observations/195035092	range extension (La Pampa)	yes	Santin & Miquel, 2015 (Buenos Aires, Misiones, Jujuy, Salta, Tucumán, La Rioja, Catamarca, Chaco, Santiago del Estero, Corrientes, Córdoba, Mendoza, Santa Fe, Entre Ríos)
Systellommatophora	Veronicelloidea	Veronicellidae	Phyllocaulis soleiformis	https://www.inaturalist.org/observations/198998129	range extension (La Pampa)	yes	Santin & Miquel, 2015 (Buenos Aires, Misiones, Jujuy, Salta, Tucumán, La Rioja, Catamarca, Chaco, Santiago del Estero, Corrientes, Córdoba, Mendoza, Santa Fe, Entre Ríos)
Systellommatophora	Veronicelloidea	Veronicellidae	Phyllocaulis variegatus	http://www.inaturalist.org/observations/1105922	within known range (Misiones)	yes	Santin & Miquel, 2015 (Buenos Aires, Misiones,Entre Ríos)
Systellommatophora	Veronicelloidea	Veronicellidae	Phyllocaulis variegatus	http://www.inaturalist.org/observations/1772140	within known range (Misiones)	yes	Santin & Miquel, 2015 (Buenos Aires, Misiones,Entre Ríos)
Systellommatophora	Veronicelloidea	Veronicellidae	Phyllocaulis variegatus	https://www.inaturalist.org/observations/37401365	within known range (Misiones)	yes	Santin & Miquel, 2015 (Buenos Aires, Misiones,Entre Ríos)
Systellommatophora	Veronicelloidea	Veronicellidae	Phyllocaulis variegatus	https://www.inaturalist.org/observations/63738311	within known range (Misiones)	yes	Santin & Miquel, 2015 (Buenos Aires, Misiones,Entre Ríos)
Systellommatophora	Veronicelloidea	Veronicellidae	Phyllocaulis variegatus	https://www.inaturalist.org/observations/110038859	within known range (Misiones)	yes	Santin & Miquel, 2015 (Buenos Aires, Misiones,Entre Ríos)
Systellommatophora	Veronicelloidea	Veronicellidae	Phyllocaulis variegatus	https://www.inaturalist.org/observations/117257849	within known range (Misiones)	yes	Santin & Miquel, 2015 (Buenos Aires, Misiones,Entre Ríos)
Systellommatophora	Veronicelloidea	Veronicellidae	Phyllocaulis variegatus	https://www.inaturalist.org/observations/121941056	within known range (Misiones)	yes	Santin & Miquel, 2015 (Buenos Aires, Misiones,Entre Ríos)
Systellommatophora	Veronicelloidea	Veronicellidae	Phyllocaulis variegatus	https://www.inaturalist.org/observations/151516788	within known range (Misiones)	yes	Santin & Miquel, 2015 (Buenos Aires, Misiones,Entre Ríos)
Systellommatophora	Veronicelloidea	Veronicellidae	Phyllocaulis variegatus	https://www.inaturalist.org/observations/154024343	within known range (Buenos Aires)	yes	Santin & Miquel, 2015 (Buenos Aires, Misiones,Entre Ríos)
Systellommatophora	Veronicelloidea	Veronicellidae	Phyllocaulis variegatus	https://www.inaturalist.org/observations/191296956	within known range (Misiones)	yes	Santin & Miquel, 2015 (Buenos Aires, Misiones,Entre Ríos)
Systellommatophora	Veronicelloidea	Veronicellidae	Phyllocaulis variegatus	https://www.inaturalist.org/observations/194183023	within known range (Misiones)	yes	Santin & Miquel, 2015 (Buenos Aires, Misiones,Entre Ríos)
Systellommatophora	Veronicelloidea	Veronicellidae	Phyllocaulis variegatus	https://www.inaturalist.org/observations/194356837	range extension (Córdoba)	yes	Santin & Miquel, 2015 (Buenos Aires, Misiones,Entre Ríos)
Systellommatophora	Veronicelloidea	Veronicellidae	Phyllocaulis variegatus	https://www.inaturalist.org/observations/195775869	within known range (Misiones)	yes	Santin & Miquel, 2015 (Buenos Aires, Misiones,Entre Ríos)
Systellommatophora	Veronicelloidea	Veronicellidae	Phyllocaulis variegatus	https://www.inaturalist.org/observations/204193950	within known range (Misiones)	yes	Santin & Miquel, 2015 (Buenos Aires, Misiones,Entre Ríos)
Systellommatophora	Veronicelloidea	Veronicellidae	Phyllocaulis variegatus	https://www.inaturalist.org/observations/205006122	within known range (Misiones)	yes	Santin & Miquel, 2015 (Buenos Aires, Misiones,Entre Ríos)
Stylommatophora	Orthalicoidea	Bulimulidae	Drymaeus poecilus	https://www.inaturalist.org/observations/196678699	range extension (San Luis)	no	Díaz, 2022 (Catamarca, Chaco, Córdoba, Formosa, Jujuy, Misiones, Salta, San Juan, Santiago del Estero and Tucumán)
Stylommatophora	Rhytidoidea	Strophocheilidae	Megalobulimus lorentzianus	https://www.inaturalist.org/observations/21306860	range extension (Santa Fe)	yes	Beltramino, 2014 (Salta, Jujuy, Tucumán, Catamarca, Santiago del Estero, Córdoba, Chaco)
Stylommatophora	Rhytidoidea	Strophocheilidae	Megalobulimus lorentzianus	https://www.inaturalist.org/observations/22600303	range extension (Santa Fe)	yes	Beltramino, 2014 (Salta, Jujuy, Tucumán, Catamarca, Santiago del Estero, Córdoba, Chaco)
Stylommatophora	Rhytidoidea	Strophocheilidae	Megalobulimus lorentzianus	https://www.inaturalist.org/observations/37575498	range extension (Santa Fe)	yes	Beltramino, 2014 (Salta, Jujuy, Tucumán, Catamarca, Santiago del Estero, Córdoba, Chaco)
Stylommatophora	Rhytidoidea	Strophocheilidae	Megalobulimus lorentzianus	https://www.inaturalist.org/observations/37844321	range extension (Santa Fe)	yes	Beltramino, 2014 (Salta, Jujuy, Tucumán, Catamarca, Santiago del Estero, Córdoba, Chaco)
Stylommatophora	Rhytidoidea	Strophocheilidae	Megalobulimus lorentzianus	https://www.inaturalist.org/observations/40877379	range extension (Santa Fe)	yes	Beltramino, 2014 (Salta, Jujuy, Tucumán, Catamarca, Santiago del Estero, Córdoba, Chaco)
Stylommatophora	Rhytidoidea	Strophocheilidae	Megalobulimus lorentzianus	https://www.inaturalist.org/observations/41099993	range extension (Santa Fe)	yes	Beltramino, 2014 (Salta, Jujuy, Tucumán, Catamarca, Santiago del Estero, Córdoba, Chaco)
Stylommatophora	Rhytidoidea	Strophocheilidae	Megalobulimus lorentzianus	https://www.inaturalist.org/observations/41115399	range extension (Santa Fe)	yes	Beltramino, 2014 (Salta, Jujuy, Tucumán, Catamarca, Santiago del Estero, Córdoba, Chaco)
Stylommatophora	Rhytidoidea	Strophocheilidae	Megalobulimus lorentzianus	https://www.inaturalist.org/observations/42256827	range extension (Santa Fe)	yes	Beltramino, 2014 (Salta, Jujuy, Tucumán, Catamarca, Santiago del Estero, Córdoba, Chaco)
Stylommatophora	Rhytidoidea	Strophocheilidae	Megalobulimus lorentzianus	https://www.inaturalist.org/observations/43060315	range extension (Santa Fe)	yes	Beltramino, 2014 (Salta, Jujuy, Tucumán, Catamarca, Santiago del Estero, Córdoba, Chaco)
Stylommatophora	Rhytidoidea	Strophocheilidae	Megalobulimus lorentzianus	https://www.inaturalist.org/observations/54700806	range extension (Santa Fe)	yes	Beltramino, 2014 (Salta, Jujuy, Tucumán, Catamarca, Santiago del Estero, Córdoba, Chaco)
Stylommatophora	Rhytidoidea	Strophocheilidae	Megalobulimus lorentzianus	https://www.inaturalist.org/observations/66065424	range extension (Santa Fe)	yes	Beltramino, 2014 (Salta, Jujuy, Tucumán, Catamarca, Santiago del Estero, Córdoba, Chaco)
Stylommatophora	Rhytidoidea	Strophocheilidae	Megalobulimus lorentzianus	https://www.inaturalist.org/observations/68912791	range extension (Santa Fe)	yes	Beltramino, 2014 (Salta, Jujuy, Tucumán, Catamarca, Santiago del Estero, Córdoba, Chaco)
Stylommatophora	Rhytidoidea	Strophocheilidae	Megalobulimus lorentzianus	https://www.inaturalist.org/observations/69033431	range extension (Santa Fe)	yes	Beltramino, 2014 (Salta, Jujuy, Tucumán, Catamarca, Santiago del Estero, Córdoba, Chaco)
Stylommatophora	Rhytidoidea	Strophocheilidae	Megalobulimus lorentzianus	https://www.inaturalist.org/observations/69673273	range extension (Santa Fe)	yes	Beltramino, 2014 (Salta, Jujuy, Tucumán, Catamarca, Santiago del Estero, Córdoba, Chaco)
Stylommatophora	Rhytidoidea	Strophocheilidae	Megalobulimus lorentzianus	https://www.inaturalist.org/observations/102044459	range extension (Santa Fe)	yes	Beltramino, 2014 (Salta, Jujuy, Tucumán, Catamarca, Santiago del Estero, Córdoba, Chaco)
Stylommatophora	Rhytidoidea	Strophocheilidae	Megalobulimus lorentzianus	https://www.inaturalist.org/observations/106793542	range extension (Santa Fe)	yes	Beltramino, 2014 (Salta, Jujuy, Tucumán, Catamarca, Santiago del Estero, Córdoba, Chaco)
Stylommatophora	Rhytidoidea	Strophocheilidae	Megalobulimus lorentzianus	https://www.inaturalist.org/observations/108212165	range extension (Santa Fe)	yes	Beltramino, 2014 (Salta, Jujuy, Tucumán, Catamarca, Santiago del Estero, Córdoba, Chaco)
Stylommatophora	Rhytidoidea	Strophocheilidae	Megalobulimus lorentzianus	https://www.inaturalist.org/observations/108343684	range extension (Santa Fe)	yes	Beltramino, 2014 (Salta, Jujuy, Tucumán, Catamarca, Santiago del Estero, Córdoba, Chaco)
Stylommatophora	Rhytidoidea	Strophocheilidae	Megalobulimus lorentzianus	https://www.inaturalist.org/observations/136213561	range extension (Santa Fe)	yes	Beltramino, 2014 (Salta, Jujuy, Tucumán, Catamarca, Santiago del Estero, Córdoba, Chaco)
Stylommatophora	Rhytidoidea	Strophocheilidae	Megalobulimus lorentzianus	https://www.inaturalist.org/observations/141883303	range extension (Santa Fe)	yes	Beltramino, 2014 (Salta, Jujuy, Tucumán, Catamarca, Santiago del Estero, Córdoba, Chaco)
Stylommatophora	Rhytidoidea	Strophocheilidae	Megalobulimus lorentzianus	https://www.inaturalist.org/observations/141978646	range extension (Santa Fe)	yes	Beltramino, 2014 (Salta, Jujuy, Tucumán, Catamarca, Santiago del Estero, Córdoba, Chaco)
Stylommatophora	Rhytidoidea	Strophocheilidae	Megalobulimus lorentzianus	https://www.inaturalist.org/observations/144845359	range extension (Santa Fe)	yes	Beltramino, 2014 (Salta, Jujuy, Tucumán, Catamarca, Santiago del Estero, Córdoba, Chaco)
Stylommatophora	Rhytidoidea	Strophocheilidae	Megalobulimus lorentzianus	https://www.inaturalist.org/observations/152054802	range extension (Santa Fe)	yes	Beltramino, 2014 (Salta, Jujuy, Tucumán, Catamarca, Santiago del Estero, Córdoba, Chaco)
Stylommatophora	Rhytidoidea	Strophocheilidae	Megalobulimus lorentzianus	https://www.inaturalist.org/observations/188282316	range extension (Santa Fe)	yes	Beltramino, 2014 (Salta, Jujuy, Tucumán, Catamarca, Santiago del Estero, Córdoba, Chaco)
Stylommatophora	Rhytidoidea	Strophocheilidae	Megalobulimus lorentzianus	https://www.inaturalist.org/observations/203171506	range extension (Santa Fe)	yes	Beltramino, 2014 (Salta, Jujuy, Tucumán, Catamarca, Santiago del Estero, Córdoba, Chaco)
Stylommatophora	Rhytidoidea	Strophocheilidae	Megalobulimus lorentzianus	https://www.inaturalist.org/observations/205434134	range extension (Santa Fe)	yes	Beltramino, 2014 (Salta, Jujuy, Tucumán, Catamarca, Santiago del Estero, Córdoba, Chaco)
Stylommatophora	Rhytidoidea	Strophocheilidae	Megalobulimus lorentzianus	https://www.inaturalist.org/observations/207265418	range extension (Santa Fe)	yes	Beltramino, 2014 (Salta, Jujuy, Tucumán, Catamarca, Santiago del Estero, Córdoba, Chaco)
Stylommatophora	Rhytidoidea	Strophocheilidae	Megalobulimus lorentzianus	https://www.inaturalist.org/observations/103892193	range extension (La Rioja)	yes	Beltramino, 2014 (Salta, Jujuy, Tucumán, Catamarca, Santiago del Estero, Córdoba, Chaco)
Stylommatophora	Rhytidoidea	Strophocheilidae	Megalobulimus lorentzianus	https://www.inaturalist.org/observations/23347886	range extension (Buenos Aires)	yes	Beltramino, 2014 (Salta, Jujuy, Tucumán, Catamarca, Santiago del Estero, Córdoba, Chaco)
Stylommatophora	Rhytidoidea	Strophocheilidae	Megalobulimus lorentzianus	https://www.inaturalist.org/observations/38373938	range extension (Buenos Aires)	yes	Beltramino, 2014 (Salta, Jujuy, Tucumán, Catamarca, Santiago del Estero, Córdoba, Chaco)
Stylommatophora	Rhytidoidea	Strophocheilidae	Megalobulimus lorentzianus	https://www.inaturalist.org/observations/68742014	range extension (Buenos Aires)	yes	Beltramino, 2014 (Salta, Jujuy, Tucumán, Catamarca, Santiago del Estero, Córdoba, Chaco)
Stylommatophora	Rhytidoidea	Strophocheilidae	Megalobulimus lorentzianus	https://www.inaturalist.org/observations/196872156	range extension (Buenos Aires)	yes	Beltramino, 2014 (Salta, Jujuy, Tucumán, Catamarca, Santiago del Estero, Córdoba, Chaco)
Stylommatophora	Rhytidoidea	Strophocheilidae	Megalobulimus oblongus	https://www.inaturalist.org/observations/128568802	range extension (Misiones)	yes	Salas Oroño, 2018 (Jujuy, Salta, Catamarca, Córdoba, Tucumán)
Stylommatophora	Rhytidoidea	Strophocheilidae	Megalobulimus oblongus	https://www.inaturalist.org/observations/153324010	range extension (Misiones)	yes	Salas Oroño, 2018 (Jujuy, Salta, Catamarca, Córdoba, Tucumán)
Stylommatophora	Rhytidoidea	Strophocheilidae	Megalobulimus oblongus	https://www.inaturalist.org/observations/217704750	range extension (Misiones)	yes	Salas Oroño, 2018 (Jujuy, Salta, Catamarca, Córdoba, Tucumán)
Stylommatophora	Rhytidoidea	Strophocheilidae	Megalobulimus sanctaepauli	https://www.inaturalist.org/observations/15314420	within known range (Misiones)	yes	Beltramino, 2012 (Misiones, Corrientes)
Stylommatophora	Rhytidoidea	Strophocheilidae	Megalobulimus sanctaepauli	https://www.inaturalist.org/observations/41342376	within known range (Misiones)	yes	Beltramino, 2012 (Misiones, Corrientes)
Stylommatophora	Rhytidoidea	Strophocheilidae	Megalobulimus sanctaepauli	https://www.inaturalist.org/observations/49169357	within known range (Misiones)	yes	Beltramino, 2012 (Misiones, Corrientes)
Stylommatophora	Rhytidoidea	Strophocheilidae	Megalobulimus sanctaepauli	https://www.inaturalist.org/observations/68923502	within known range (Misiones)	yes	Beltramino, 2012 (Misiones, Corrientes)
Stylommatophora	Rhytidoidea	Strophocheilidae	Megalobulimus sanctaepauli	https://www.inaturalist.org/observations/75119450	within known range (Misiones)	yes	Beltramino, 2012 (Misiones, Corrientes)
Stylommatophora	Rhytidoidea	Strophocheilidae	Megalobulimus sanctaepauli	https://www.inaturalist.org/observations/92577998	within known range (Misiones)	yes	Beltramino, 2012 (Misiones, Corrientes)
Stylommatophora	Rhytidoidea	Strophocheilidae	Megalobulimus sanctaepauli	https://www.inaturalist.org/observations/117257843	within known range (Misiones)	yes	Beltramino, 2012 (Misiones, Corrientes)
Stylommatophora	Rhytidoidea	Strophocheilidae	Megalobulimus sanctaepauli	https://www.inaturalist.org/observations/117257848	within known range (Misiones)	yes	Beltramino, 2012 (Misiones, Corrientes)
Stylommatophora	Rhytidoidea	Strophocheilidae	Megalobulimus sanctaepauli	https://www.inaturalist.org/observations/146424176	within known range (Misiones)	yes	Beltramino, 2012 (Misiones, Corrientes)
Stylommatophora	Rhytidoidea	Strophocheilidae	Megalobulimus sanctaepauli	https://www.inaturalist.org/observations/161174383	within known range (Misiones)	yes	Beltramino, 2012 (Misiones, Corrientes)
Stylommatophora	Rhytidoidea	Strophocheilidae	Megalobulimus sanctaepauli	https://www.inaturalist.org/observations/161174404	within known range (Misiones)	yes	Beltramino, 2012 (Misiones, Corrientes)
Stylommatophora	Rhytidoidea	Strophocheilidae	Megalobulimus sanctaepauli	https://www.inaturalist.org/observations/204193972	within known range (Misiones)	yes	Beltramino, 2012 (Misiones, Corrientes)
Stylommatophora	Rhytidoidea	Strophocheilidae	Megalobulimus sanctaepauli	https://www.inaturalist.org/observations/205521058	within known range (Misiones)	yes	Beltramino, 2012 (Misiones, Corrientes)
Stylommatophora	Orthalicoidea	Bulimulidae	Drymaeus papyraceus	https://www.inaturalist.org/observations/77528777	range extension (Chaco)	yes	Cuezzo et al., 2013 (Buenos Aires, Corrientes, Entre Ríos, Formosa, Misiones)
Stylommatophora	Orthalicoidea	Bulimulidae	Drymaeus papyraceus	https://www.inaturalist.org/observations/120231355	range extension (Santa Fe)	yes	Cuezzo et al., 2013 (Buenos Aires, Corrientes, Entre Ríos, Formosa, Misiones)
Stylommatophora	Orthalicoidea	Bulimulidae	Mesembrinus interpunctus	https://www.inaturalist.org/observations/153080583	range extension (Buenos Aires)	yes	Cuezzo et al., 2013 (Buenos Aires, Corrientes, Formosa, Misiones)
Stylommatophora	Orthalicoidea	Bothriembryontidae	Discoleus aguirrei	https://www.inaturalist.org/observations/64729245	within known range (Buenos Aires)	no	Cuezzo et al., 2013 (Buenos Aires, La Pampa)
Stylommatophora	Orthalicoidea	Bothriembryontidae	Discoleus aguirrei	https://www.inaturalist.org/observations/72741352	within known range (La Pampa)	no	Cuezzo et al., 2013 (Buenos Aires, La Pampa)
Stylommatophora	Orthalicoidea	Bothriembryontidae	Discoleus aguirrei	https://www.inaturalist.org/observations/95003818	within known range (Buenos Aires)	no	Cuezzo et al., 2013 (Buenos Aires, La Pampa)
Stylommatophora	Orthalicoidea	Bothriembryontidae	Discoleus aguirrei	https://www.inaturalist.org/observations/101794290	within known range (Buenos Aires)	no	Cuezzo et al., 2013 (Buenos Aires, La Pampa)
Stylommatophora	Orthalicoidea	Bothriembryontidae	Discoleus aguirrei	https://www.inaturalist.org/observations/123895110	within known range (Buenos Aires)	no	Cuezzo et al., 2013 (Buenos Aires, La Pampa)
Stylommatophora	Orthalicoidea	Bothriembryontidae	Discoleus aguirrei	https://www.inaturalist.org/observations/123895393	within known range (Buenos Aires)	no	Cuezzo et al., 2013 (Buenos Aires, La Pampa)
Stylommatophora	Orthalicoidea	Bothriembryontidae	Discoleus aguirrei	https://www.inaturalist.org/observations/123897135	within known range (Buenos Aires)	no	Cuezzo et al., 2013 (Buenos Aires, La Pampa)
Stylommatophora	Orthalicoidea	Bothriembryontidae	Discoleus aguirrei	https://www.inaturalist.org/observations/136269408	within known range (Buenos Aires)	no	Cuezzo et al., 2013 (Buenos Aires, La Pampa)
Stylommatophora	Orthalicoidea	Bothriembryontidae	Discoleus aguirrei	https://www.inaturalist.org/observations/168654296	within known range (Buenos Aires)	no	Cuezzo et al., 2013 (Buenos Aires, La Pampa)
Stylommatophora	Orthalicoidea	Bothriembryontidae	Discoleus aguirrei	https://www.inaturalist.org/observations/200956583	within known range (Buenos Aires)	yes	Cuezzo et al., 2013 (Buenos Aires, La Pampa)
Stylommatophora	Orthalicoidea	Bothriembryontidae	Discoleus aguirrei	https://www.inaturalist.org/observations/218796137	within known range (Buenos Aires)	no	Cuezzo et al., 2013 (Buenos Aires, La Pampa)
Stylommatophora	Orthalicoidea	Bothriembryontidae	Discoleus ameghinoi	https://www.inaturalist.org/observations/37758593	within known range (Río Negro)	no	Fernandez, 1965
Stylommatophora	Orthalicoidea	Bothriembryontidae	Discoleus ameghinoi	https://www.inaturalist.org/observations/102740317	within known range (Río Negro)	yes	Fernandez, 1966
Stylommatophora	Orthalicoidea	Bothriembryontidae	Discoleus ameghinoi	https://www.inaturalist.org/observations/194676614	within known range (Río Negro)	yes	Fernandez, 1967
Stylommatophora	Orthalicoidea	Bothriembryontidae	Discoleus ameghinoi	https://www.inaturalist.org/observations/121822542	incorrect identification	no	Fernandez, 1969
Stylommatophora	Orthalicoidea	Bothriembryontidae	Discoleus ameghinoi	https://www.inaturalist.org/observations/213845515	incorrect identification	no	Fernandez, 1969
Stylommatophora	Orthalicoidea	Bothriembryontidae	Discoleus ameghinoi	https://www.inaturalist.org/observations/121823137	incorrect identification	no	Fernandez, 1969
Stylommatophora	Orthalicoidea	Bothriembryontidae	Discoleus ameghinoi	https://www.inaturalist.org/observations/121822763	incorrect identification	no	Fernandez, 1969
Stylommatophora	Orthalicoidea	Bothriembryontidae	Discoleus ameghinoi	https://www.inaturalist.org/observations/121822148	incorrect identification	no	Fernandez, 1969
Systellommatophora	Veronicelloidea	Veronicellidae	Belocaulus angustipes	https://www.inaturalist.org/observations/30041592	possible new location (Misiones)	yes	Pitoni & Thomé, 1981; Thomé, 1993; Ohlweiler et al., 2009 (Santa Fe, Tucumán ); Gutiérrez et al., 2020 (Buenos Aires)
Stylommatophora	Sagdoidea	Solaropsidae	Solaropsis sp.	https://www.inaturalist.org/observations/43632008	collection required for precise identification	yes	Cuezzo et al., 2018
Stylommatophora	Sagdoidea	Solaropsidae	Solaropsis sp.	https://www.inaturalist.org/observations/94588181	collection required for precise identification	no	Cuezzo et al., 2018
Stylommatophora	Clausilioidea	Clausiliidae	Clausiliidae	https://www.inaturalist.org/observations/156062693	collection required for precise identification	no
Stylommatophora	Clausilioidea	Clausiliidae	Clausiliidae	https://www.inaturalist.org/observations/195786275	collection required for precise identification	no
Stylommatophora	Orthalicoidea	Cyclodontinidae	Plagiodontes daedaleus	https://www.inaturalist.org/observations/70911109	within known range (Córdoba)	yes	Miquel & Aguirre, 2011 (west-central Argentina)
Stylommatophora	Orthalicoidea	Cyclodontinidae	Plagiodontes daedaleus	https://www.inaturalist.org/observations/102246885	within known range (Córdoba)	yes	Miquel & Aguirre, 2011 (west-central Argentina)
Stylommatophora	Orthalicoidea	Cyclodontinidae	Plagiodontes daedaleus	https://www.inaturalist.org/observations/106851745	within known range (Córdoba)	no	Miquel & Aguirre, 2011 (west-central Argentina)
Stylommatophora	Orthalicoidea	Cyclodontinidae	Plagiodontes daedaleus	https://www.inaturalist.org/observations/127331516	within known range (Córdoba)	no	Miquel & Aguirre, 2011 (west-central Argentina)
Stylommatophora	Orthalicoidea	Cyclodontinidae	Plagiodontes daedaleus	https://www.inaturalist.org/observations/128292485	within known range (Córdoba)	no	Miquel & Aguirre, 2011 (west-central Argentina)
Stylommatophora	Orthalicoidea	Cyclodontinidae	Plagiodontes daedaleus	https://www.inaturalist.org/observations/136751352	within known range (Córdoba)	yes	Miquel & Aguirre, 2011 (west-central Argentina)
Stylommatophora	Orthalicoidea	Cyclodontinidae	Plagiodontes daedaleus	https://www.inaturalist.org/observations/151293290	within known range (Córdoba)	no	Miquel & Aguirre, 2011 (west-central Argentina)
Stylommatophora	Orthalicoidea	Cyclodontinidae	Plagiodontes daedaleus	https://www.inaturalist.org/observations/163402863	within known range (Córdoba)	no	Miquel & Aguirre, 2011 (west-central Argentina)
Stylommatophora	Orthalicoidea	Cyclodontinidae	Plagiodontes daedaleus	https://www.inaturalist.org/observations/176163594	within known range (Santiago del Estero)	no	Miquel & Aguirre, 2011 (west-central Argentina)
Stylommatophora	Orthalicoidea	Cyclodontinidae	Plagiodontes weyenberghii	https://www.inaturalist.org/observations/21494755	within known range (Córdoba)	no	Gordillo et al., 2013
Stylommatophora	Orthalicoidea	Cyclodontinidae	Plagiodontes weyenberghii	https://www.inaturalist.org/observations/96843736	within known range (Córdoba)	no	Gordillo et al., 2014
Stylommatophora	Orthalicoidea	Cyclodontinidae	Plagiodontes patagonicus	https://www.inaturalist.org/observations/27451676	within known range (Buenos Aires)	no	Pizá & Cazzaniga, 2003 (Buenos Aires)
Stylommatophora	Orthalicoidea	Cyclodontinidae	Plagiodontes patagonicus	https://www.inaturalist.org/observations/27452890	within known range (Buenos Aires)	yes	Pizá & Cazzaniga, 2003 (Buenos Aires)
Stylommatophora	Orthalicoidea	Cyclodontinidae	Plagiodontes patagonicus	https://www.inaturalist.org/observations/27452892	within known range (Buenos Aires)	yes	Pizá & Cazzaniga, 2003 (Buenos Aires)
Stylommatophora	Orthalicoidea	Cyclodontinidae	Plagiodontes patagonicus	https://www.inaturalist.org/observations/37844254	within known range (Buenos Aires)	yes	Pizá & Cazzaniga, 2003 (Buenos Aires)
Stylommatophora	Orthalicoidea	Cyclodontinidae	Plagiodontes patagonicus	https://www.inaturalist.org/observations/38551942	within known range (Buenos Aires)	no	Pizá & Cazzaniga, 2003 (Buenos Aires)
Stylommatophora	Orthalicoidea	Cyclodontinidae	Plagiodontes patagonicus	https://www.inaturalist.org/observations/61019649	within known range (Buenos Aires)	no	Pizá & Cazzaniga, 2003 (Buenos Aires)
Stylommatophora	Orthalicoidea	Cyclodontinidae	Plagiodontes patagonicus	https://www.inaturalist.org/observations/86623389	within known range (Buenos Aires)	no	Pizá & Cazzaniga, 2003 (Buenos Aires)
Stylommatophora	Orthalicoidea	Cyclodontinidae	Plagiodontes patagonicus	https://www.inaturalist.org/observations/98899626	within known range (Buenos Aires)	no	Pizá & Cazzaniga, 2003 (Buenos Aires)
Stylommatophora	Orthalicoidea	Cyclodontinidae	Plagiodontes patagonicus	https://www.inaturalist.org/observations/116935724	within known range (Buenos Aires)	yes	Pizá & Cazzaniga, 2003 (Buenos Aires)
Stylommatophora	Orthalicoidea	Cyclodontinidae	Plagiodontes patagonicus	https://www.inaturalist.org/observations/123886996	within known range (Buenos Aires)	no	Pizá & Cazzaniga, 2003 (Buenos Aires)
Stylommatophora	Orthalicoidea	Cyclodontinidae	Plagiodontes patagonicus	https://www.inaturalist.org/observations/143679853	within known range (Buenos Aires)	no	Pizá & Cazzaniga, 2003 (Buenos Aires)
Stylommatophora	Orthalicoidea	Cyclodontinidae	Plagiodontes patagonicus	https://www.inaturalist.org/observations/148066445	within known range (Buenos Aires)	no	Pizá & Cazzaniga, 2003 (Buenos Aires)
Stylommatophora	Orthalicoidea	Cyclodontinidae	Plagiodontes patagonicus	https://www.inaturalist.org/observations/151557235	within known range (Buenos Aires)	no	Pizá & Cazzaniga, 2003 (Buenos Aires)
Stylommatophora	Orthalicoidea	Cyclodontinidae	Plagiodontes patagonicus	https://www.inaturalist.org/observations/158984656	within known range (Buenos Aires)	no	Pizá & Cazzaniga, 2003 (Buenos Aires)
Stylommatophora	Orthalicoidea	Cyclodontinidae	Plagiodontes patagonicus	https://www.inaturalist.org/observations/162163166	within known range (Buenos Aires)	no	Pizá & Cazzaniga, 2003 (Buenos Aires)
Stylommatophora	Orthalicoidea	Cyclodontinidae	Plagiodontes patagonicus	https://www.inaturalist.org/observations/183576017	within known range (Buenos Aires)	no	Pizá & Cazzaniga, 2003 (Buenos Aires)
Stylommatophora	Orthalicoidea	Cyclodontinidae	Plagiodontes patagonicus	https://www.inaturalist.org/observations/191705848	within known range (Buenos Aires)	no	Pizá & Cazzaniga, 2003 (Buenos Aires)
Stylommatophora	Orthalicoidea	Cyclodontinidae	Plagiodontes patagonicus	https://www.inaturalist.org/observations/194552823	within known range (Buenos Aires)	no	Pizá & Cazzaniga, 2003 (Buenos Aires)
Stylommatophora	Orthalicoidea	Cyclodontinidae	Plagiodontes patagonicus	https://www.inaturalist.org/observations/213882046	within known range (Buenos Aires)	no	Pizá & Cazzaniga, 2003 (Buenos Aires)
Stylommatophora	Orthalicoidea	Cyclodontinidae	Plagiodontes multiplicatus	https://www.inaturalist.org/observations/75401703	within known range (Córdoba)	no	Pizá & Cazzaniga, 2003 (west-central Argentina)
Stylommatophora	Orthalicoidea	Cyclodontinidae	Plagiodontes strobelii	https://www.inaturalist.org/observations/21101685	within known range (Córdoba)	yes	Gordillo et al., 2013 (Córdoba)
Stylommatophora	Orthalicoidea	Cyclodontinidae	Plagiodontes strobelii	https://www.inaturalist.org/observations/111876727	within known range (Córdoba)	no	Gordillo et al., 2013 (Córdoba)
Stylommatophora	Orthalicoidea	Cyclodontinidae	Plagiodontes strobelii	https://www.inaturalist.org/observations/136754222	within known range (Córdoba)	no	Gordillo et al., 2013 (Córdoba)
Stylommatophora	Orthalicoidea	Cyclodontinidae	Plagiodontes strobelii	https://www.inaturalist.org/observations/136754223	within known range (Córdoba)	yes	Gordillo et al., 2013 (Córdoba)
Stylommatophora	Orthalicoidea	Cyclodontinidae	Plagiodontes strobelii	https://www.inaturalist.org/observations/138284044	within known range (Córdoba)	no	Gordillo et al., 2013 (Córdoba)
Stylommatophora	Orthalicoidea	Cyclodontinidae	Plagiodontes strobelii	https://www.inaturalist.org/observations/177388824	within known range (Córdoba)	no	Gordillo et al., 2013 (Córdoba)
Stylommatophora	Rhytidoidea	Odontostomidae	Anthinus albolabiatus	https://www.inaturalist.org/observations/20283998	within known range (Corrientes)	yes	Bonard et al., 2012 (Corrientes and Misiones)
Stylommatophora	Rhytidoidea	Odontostomidae	Anthinus albolabiatus	https://www.inaturalist.org/observations/122954348	within known range (Misiones)	no	Bonard et al., 2012 (Corrientes and Misiones)
Stylommatophora	Orthalicoidea	Simpulopsidae	Simpulopsis eudioptus	https://www.inaturalist.org/observations/109258726	within known range (Misiones)	yes	Cuezzo et al., 2013 (Jujuy, Misiones)
Stylommatophora	Orthalicoidea	Simpulopsidae	Simpulopsis eudioptus	https://www.inaturalist.org/observations/144632959	within known range (Misiones)	yes	Cuezzo et al., 2013 (Jujuy, Misiones)
Stylommatophora	Orthalicoidea	Bulimulidae	Rabdotus dealbatus	https://www.inaturalist.org/observations/222651057	possible erroneous identification	yes
Stylommatophora	Orthalicoidea	Cyclodontinidae	Cyclodontina sp.	https://www.inaturalist.org/observations/134987098	collection required for precise identification	no
Stylommatophora	Succineoidea	Succineidae	Oxyloma sp.	https://www.inaturalist.org/observations/129050253	collection required for precise identification	yes
Stylommatophora	Scolodontoidea	Scolodontidae	Scolodontinae	https://www.inaturalist.org/observations/222711592	collection required for precise identification	yes
Stylommatophora	Orthalicoidea	Cyclodontinidae	Clessinia chancanina	https://www.inaturalist.org/observations/21101422	within known range (Córdoba)	yes	Hylton Scott, 1965 (Córdoba)
Stylommatophora	Orthalicoidea	Cyclodontinidae	Clessinia chancanina	https://www.inaturalist.org/observations/37763198	within known range (Córdoba)	no	Hylton Scott, 1965 (Córdoba)
Stylommatophora	Orthalicoidea	Cyclodontinidae	Clessinia chancanina	https://www.inaturalist.org/observations/73470537	within known range (Córdoba)	yes	Hylton Scott, 1965 (Córdoba)
Stylommatophora	Orthalicoidea	Cyclodontinidae	Clessinia cordovana	https://www.inaturalist.org/observations/168541313	within known range (Córdoba)	no	Cuezzo et al., 2018 (Córdoba)
Stylommatophora	Orthalicoidea	Bulimulidae	Bostryx stelzneri	https://www.inaturalist.org/observations/43151183	within known range (Tucumán)	no	Miranda & Cuezzo, 2014 (Bolivia a San Luis)
Stylommatophora	Helicoidea	Epiphragmophoridae	Epiphragmophora jujuyensis	https://www.inaturalist.org/observations/219897638	within known range (Salta)	no	Fernandez & Rumi, 1984; Cuezzo, 2006 (Salta and Jujuy)
Stylommatophora	Helicoidea	Epiphragmophoridae	Epiphragmophora puntana	https://www.inaturalist.org/observations/105300293	potential new species	yes	Fernandez & Rumi, 1984; Cuezzo, 2006 (Salta and Jujuy)
Stylommatophora	Helicoidea	Epiphragmophoridae	Epiphragmophora puntana	https://www.inaturalist.org/observations/105479501	seems to correspond to another species of Epiphragmophora	yes	Fernandez & Rumi, 1984; Cuezzo, 2006 (Salta and Jujuy)
Stylommatophora	Helicoidea	Epiphragmophoridae	Epiphragmophora puntana	https://www.inaturalist.org/observations/36379458	first image of the living animal	yes	Fernandez & Rumi, 1984; Cuezzo, 2006 (Salta and Jujuy)
Stylommatophora	Helicoidea	Epiphragmophoridae	Epiphragmophora puntana	https://www.inaturalist.org/observations/22227718	first image of the living animal	yes	Fernandez & Rumi, 1984; Cuezzo, 2006 (Salta and Jujuy)
Stylommatophora	Trochomorphoidea	Euconulidae	Habroconus sp.	https://www.inaturalist.org/observations/19949188	within known range (Jujuy)	yes	Miranda & Cuezzo, 2010 (Yungas)
Stylommatophora	Helicoidea	Epiphragmophoridae	Epiphragmophora trenquelleonis	https://www.inaturalist.org/observations/38023261	within known range (Córdoba)	yes	Cuezzo, 2006 (Córdoba, Santiago del Estero, San Luis, Catamarca, La Rioja, Chaco y Formosa)
Stylommatophora	Helicoidea	Epiphragmophoridae	Epiphragmophora trenquelleonis	https://www.inaturalist.org/observations/61873793	within known range (Córdoba)	yes	Cuezzo, 2006 (Córdoba, Santiago del Estero, San Luis, Catamarca, La Rioja, Chaco y Formosa)
Stylommatophora	Helicoidea	Epiphragmophoridae	Epiphragmophora trenquelleonis	https://www.inaturalist.org/observations/69235452	within known range (Córdoba)	no	Cuezzo, 2006 (Córdoba, Santiago del Estero, San Luis, Catamarca, La Rioja, Chaco y Formosa)
Stylommatophora	Helicoidea	Epiphragmophoridae	Epiphragmophora trenquelleonis	https://www.inaturalist.org/observations/98947663	within known range (Córdoba)	no	Cuezzo, 2006 (Córdoba, Santiago del Estero, San Luis, Catamarca, La Rioja, Chaco y Formosa)
Stylommatophora	Helicoidea	Epiphragmophoridae	Epiphragmophora trenquelleonis	https://www.inaturalist.org/observations/99008622	within known range (Córdoba)	no	Cuezzo, 2006 (Córdoba, Santiago del Estero, San Luis, Catamarca, La Rioja, Chaco y Formosa)
Stylommatophora	Helicoidea	Epiphragmophoridae	Epiphragmophora trenquelleonis	https://www.inaturalist.org/observations/99843183	within known range (Córdoba)	no	Cuezzo, 2006 (Córdoba, Santiago del Estero, San Luis, Catamarca, La Rioja, Chaco y Formosa)
Stylommatophora	Helicoidea	Epiphragmophoridae	Epiphragmophora trenquelleonis	https://www.inaturalist.org/observations/101438022	within known range (Córdoba)	yes	Cuezzo, 2006 (Córdoba, Santiago del Estero, San Luis, Catamarca, La Rioja, Chaco y Formosa)
Stylommatophora	Helicoidea	Epiphragmophoridae	Epiphragmophora trenquelleonis	https://www.inaturalist.org/observations/102386951	within known range (Córdoba)	yes	Cuezzo, 2006 (Córdoba, Santiago del Estero, San Luis, Catamarca, La Rioja, Chaco y Formosa)
Stylommatophora	Helicoidea	Epiphragmophoridae	Epiphragmophora trenquelleonis	https://www.inaturalist.org/observations/102386951	range extension (Catamarca)	yes	Cuezzo, 2006 (Córdoba, Santiago del Estero, San Luis, Catamarca, La Rioja, Chaco y Formosa)
Stylommatophora	Helicoidea	Epiphragmophoridae	Epiphragmophora trenquelleonis	https://www.inaturalist.org/observations/107423064	within known range (Córdoba)	yes	Cuezzo, 2006 (Córdoba, Santiago del Estero, San Luis, Catamarca, La Rioja, Chaco and Formosa)
Stylommatophora	Orthalicoidea	Cyclodontinidae	Plagiodontes dentatus	https://www.inaturalist.org/observations/141296040	within known range (Entre Ríos)	no	Pizá & Cazzaniga, 2003 (Entre Ríos, norte de Buenos Aires and Uruguay)
Stylommatophora	Orthalicoidea	Cyclodontinidae	Ventania avellanedae	https://www.inaturalist.org/observations/37844964	within known range (Buenos Aires)	no	Pizá et al., 2018 (Buenos Aires)
Stylommatophora	Orthalicoidea	Cyclodontinidae	Ventania avellanedae	https://www.inaturalist.org/observations/196508010	within known range (Buenos Aires)	no	Pizá et al., 2018 (Buenos Aires)
Stylommatophora	Orthalicoidea	Cyclodontinidae	Ventania avellanedae	https://www.inaturalist.org/observations/221655225	within known range (Buenos Aires)	yes	Pizá et al., 2018 (Buenos Aires)
Stylommatophora	Rhytidoidea	Strophocheilidae	Austroborus dorbignyi	https://www.inaturalist.org/observations/37130720	within known range (Buenos Aires)	yes	Bonard et al., 2012 (south of Buenos Aires)
Stylommatophora	Rhytidoidea	Strophocheilidae	Austroborus dorbignyi	https://www.inaturalist.org/observations/38552195	within known range (Buenos Aires)	no	Bonard et al., 2012 (south of Buenos Aires)
Stylommatophora	Rhytidoidea	Strophocheilidae	Austroborus dorbignyi	https://www.inaturalist.org/observations/73888750	within known range (Buenos Aires)	no	Bonard et al., 2012 (south of Buenos Aires)
Stylommatophora	Rhytidoidea	Strophocheilidae	Austroborus dorbignyi	https://www.inaturalist.org/observations/123894727	within known range (Buenos Aires)	no	Bonard et al., 2012 (south of Buenos Aires)
Stylommatophora	Rhytidoidea	Strophocheilidae	Austroborus dorbignyi	https://www.inaturalist.org/observations/169821656	within known range (Buenos Aires)	no	Bonard et al., 2012 (south of Buenos Aires)
Stylommatophora	Rhytidoidea	Strophocheilidae	Austroborus dorbignyi	https://www.inaturalist.org/observations/190093382	within known range (Buenos Aires)	no	Bonard et al., 2012 (south of Buenos Aires)
Stylommatophora	Rhytidoidea	Strophocheilidae	Austroborus dorbignyi	https://www.inaturalist.org/observations/194527097	within known range (Buenos Aires)	no	Bonard et al., 2012 (south of Buenos Aires)
Stylommatophora	Rhytidoidea	Strophocheilidae	Austroborus dorbignyi	https://www.inaturalist.org/observations/194759113	within known range (Buenos Aires)	yes	Bonard et al., 2012 (south of Buenos Aires)
Stylommatophora	Rhytidoidea	Strophocheilidae	Austroborus dorbignyi	https://www.inaturalist.org/observations/195365305	within known range (Buenos Aires)	no	Bonard et al., 2012 (south of Buenos Aires)
Stylommatophora	Rhytidoidea	Strophocheilidae	Austroborus dorbignyi	https://www.inaturalist.org/observations/209025695	within known range (Buenos Aires)	yes	Bonard et al., 2012 (south of Buenos Aires)
Stylommatophora	Rhytidoidea	Strophocheilidae	Austroborus dorbignyi	https://www.inaturalist.org/observations/209025700	within known range (Buenos Aires)	yes	Bonard et al., 2012 (south of Buenos Aires)
Stylommatophora	Rhytidoidea	Strophocheilidae	Austroborus dorbignyi	https://www.inaturalist.org/observations/210096404	within known range (Buenos Aires)	no	Bonard et al., 2012 (south of Buenos Aires)
Stylommatophora	Rhytidoidea	Strophocheilidae	Austroborus dorbignyi	https://www.inaturalist.org/observations/221181410	within known range (Buenos Aires)	no	Bonard et al., 2012 (south of Buenos Aires)
Stylommatophora	Succineoidea	Succineidae	Succinea meridionalis	https://www.inaturalist.org/observations/99143780	within known range (La Pampa)	no	Hylton Scott, 1963; Miquel & Aguirre, 2011 (Argentina- tropical and temperate zones up to Patagonia)
Stylommatophora	Succineoidea	Succineidae	Succinea meridionalis	https://www.inaturalist.org/observations/101284455	within known range (La Pampa)	no	Hylton Scott, 1963; Miquel & Aguirre, 2011 (Argentina- tropical and temperate zones up to Patagonia)
Stylommatophora	Succineoidea	Succineidae	Succinea meridionalis	https://www.inaturalist.org/observations/102569290	within known range (Buenos Aires)	yes	Hylton Scott, 1963; Miquel & Aguirre, 2011 (Argentina- tropical and temperate zones up to Patagonia)
Stylommatophora	Succineoidea	Succineidae	Succinea meridionalis	https://www.inaturalist.org/observations/106347271	within known range (La Pampa)	no	Hylton Scott, 1963; Miquel & Aguirre, 2011 (Argentina- tropical and temperate zones up to Patagonia)
Stylommatophora	Succineoidea	Succineidae	Succinea meridionalis	https://www.inaturalist.org/observations/108260654	within known range (Buenos Aires)	no	Hylton Scott, 1963; Miquel & Aguirre, 2011 (Argentina- tropical and temperate zones up to Patagonia)
Stylommatophora	Succineoidea	Succineidae	Succinea meridionalis	https://www.inaturalist.org/observations/113604732	within known range (La Pampa)	yes	Hylton Scott, 1963; Miquel & Aguirre, 2011 (Argentina- tropical and temperate zones up to Patagonia)
Stylommatophora	Succineoidea	Succineidae	Succinea meridionalis	https://www.inaturalist.org/observations/114030438	within known range (La Pampa)	no	Hylton Scott, 1963; Miquel & Aguirre, 2011 (Argentina- tropical and temperate zones up to Patagonia)
Stylommatophora	Succineoidea	Succineidae	Succinea meridionalis	https://www.inaturalist.org/observations/114534323	within known range (La Pampa)	no	Hylton Scott, 1963; Miquel & Aguirre, 2011 (Argentina- tropical and temperate zones up to Patagonia)
Stylommatophora	Succineoidea	Succineidae	Succinea meridionalis	https://www.inaturalist.org/observations/122562327	within known range (La Pampa)	yes	Hylton Scott, 1963; Miquel & Aguirre, 2011 (Argentina- tropical and temperate zones up to Patagonia)
Stylommatophora	Succineoidea	Succineidae	Succinea meridionalis	https://www.inaturalist.org/observations/128539075	within known range (La Pampa)	yes	Hylton Scott, 1963; Miquel & Aguirre, 2011 (Argentina- tropical and temperate zones up to Patagonia)
Stylommatophora	Succineoidea	Succineidae	Succinea meridionalis	https://www.inaturalist.org/observations/132215928	within known range (La Pampa)	no	Hylton Scott, 1963; Miquel & Aguirre, 2011 (Argentina- tropical and temperate zones up to Patagonia)
Stylommatophora	Succineoidea	Succineidae	Omalonyx unguis	https://www.inaturalist.org/observations/50835723	within known range (Santa Fe)	yes	Coscarelli & Vidigal, 2011 (Buenos Aires, Santa Fe, Formosa, Chaco); Guzman et al., 2018 (Misiones)
Stylommatophora	Succineoidea	Succineidae	Omalonyx unguis	https://www.inaturalist.org/observations/69259449	within known range (Buenos Aires)	yes	Coscarelli & Vidigal, 2011 (Buenos Aires, Santa Fe, Formosa, Chaco); Guzman et al., 2018 (Misiones)
Stylommatophora	Succineoidea	Succineidae	Omalonyx unguis	https://www.inaturalist.org/observations/77143198	within known range (Santa Fe)	yes	Coscarelli & Vidigal, 2011 (Buenos Aires, Santa Fe, Formosa, Chaco); Guzman et al., 2018 (Misiones)
Stylommatophora	Succineoidea	Succineidae	Omalonyx unguis	https://www.inaturalist.org/observations/77143216	within known range (Santa Fe)	yes	Coscarelli & Vidigal, 2011 (Buenos Aires, Santa Fe, Formosa, Chaco); Guzman et al., 2018 (Misiones)
Stylommatophora	Succineoidea	Succineidae	Omalonyx unguis	https://www.inaturalist.org/observations/112599440	within known range (Santa Fe)	yes	Coscarelli & Vidigal, 2011 (Buenos Aires, Santa Fe, Formosa, Chaco); Guzman et al., 2018 (Misiones)
Systellommatophora	Veronicelloidea	Veronicellidae	Angustipes difficilis	https://www.inaturalist.org/observations/114915925	within known range (Santa Fe)	yes	Santin & Miquel, 2015 (Salta, Tucumán, Misiones, Chaco, Corrientes, Santa Fe, Entre Ríos and Buenos Aires)
Systellommatophora	Veronicelloidea	Veronicellidae	Angustipes difficilis	https://www.inaturalist.org/observations/197897139	within known range (Santa Fe)	yes	Santin & Miquel, 2015 (Salta, Tucumán, Misiones, Chaco, Corrientes, Santa Fe, Entre Ríos and Buenos Aires)
Systellommatophora	Veronicelloidea	Veronicellidae	Angustipes difficilis	https://www.inaturalist.org/observations/202967044	within known range (Santa Fe)	yes	Santin & Miquel, 2015 (Salta, Tucumán, Misiones, Chaco, Corrientes, Santa Fe, Entre Ríos and Buenos Aires)
